# Supplementary material for: Nitric Oxide Is Associated With Heterosis of Salinity Tolerance in Brassica napus L
Source: Front Plant Sci. 2021 May 28;12:649888. doi: 10.3389/fpls.2021.649888 (PMC8194068; doi:10.3389/fpls.2021.649888)
Supplement: Supplementary Table 1 — The sequences of primers for qPCR. [file Data_Sheet_1.xls]

## Sheet: Supplementary Table S1
Supplementary Table S1 The sequences of primers for qPCR
Accession	Primer name	Sequences (5'-3')
A0A078CW69	BnHEMC-F	GAACCACGAGGAAACGAGACT
	BnHEMC-R	CAGCAATAGGAGTACGGCATG
A0A078FSF5	BnPPOX-F	ATCCTATGCTCACTATGGTGGTA
	BnPPOX-R	ATCAAGTCAAAGAAAGGCAAGT
A0A078HA16	BnCHLM-F	GCGTAAGGTTGGGTGGAGAA
	BnCHLM-R	GTGAAGTTTGCATAGACGGCA
A0A078FHJ5	BnPCB2-F	GTCTTCTTCTTCTTCCTCCACC
	BnPCB2-R	GAACCACGAATCTGCCTATGT
A0A078GUT8	BnPORB-F	TGCGACTAATCATTTGGGACA
	BnPORB-R	GTTCAAACCGTTCAATCCACC
A0A078IH04	BnCS-F	GGATTCAATGGGCAATAGGTC
	BnCS-R	TAGAGGCAAGATGACGAGCAG
A0A078FVI0	BnICDH-F	TCACCTACTCCACTCACCACCAT
	BnICDH-R	ACGTTCTAGTCTTCGGCGATC
A0A078FMN3	BnPYD2-F	GCTGGTTGGGAAAGCTAGGAG
	BnPYD2-R	CAAACATACCGAGATTCGATAAAGT
A0A078FRZ0	BnOGD2-F	TTCCCAGTCGTCATTCCATTC
	BnOGD2-R	GACAGCACGCAACATCATCCC
A0A078HSE9	BnSCS-F	GCACCAGCTCCGAAGCTATTC
	BnSCS-R	CGTCACTCCTGCCACCATTTT
A0A078F9Z9	BnP5CR-F	TCACAGACGGTTCTTGGAGC
	BnP5CR-R	CCCGCCTGGTGAAGTAACAT
A0A078E0Y2	BnP5CS1-F	GTTGATCCTCCACAACTTCCCT
	BnP5CS1-R	ACAACACCGGTTCCAACCTT
A0A078HWQ9	BnP5CS2-F	ACTTGATATCTCCCATCACCCG
	BnP5CS2-R	AAAGCGCGGGAACGATCTAT
A0A078G092	BnPDH-F	GCCAAGTCCTTGCCAACATC
	BnPDH-R	GCAAGTCGCTCACACGTTTT
P39867	BnNIA1-F	ACAAAACCACCAAAGAAGACCG
	BnNIA1-R	GATCCATTTGTCACCCGTGG
P39868	BnNIA2-F	AGGAATTCGGCACGAGCAAA
	BnNIA2-R	GTTTGAAGGAGCGAACGACG
Q9ZSD7	BnActin-F	CTGACCGTATGAGCAAAG
	BnActin-R	CCACCGAACCAGAAGGCAGA
D8L1X4	BnGAPDH-F	TGTGCCAATCTACGAGGGTTT
	BnGAPDH-R	TTTCCCGCTCTGCTGTTGT

## Sheet: Supplementary Table S2
Supplementary Table S2. Total number of identified proteins
Accession	Gene name	Description	Fasta headers	Mol. weight [kDa]	Sequence length	Unique peptides	LFQ intensity F1 Con-1	LFQ intensity F1 Con-2	LFQ intensity F1 Con-3	mean F1 Con	LFQ intensity F1 NaCl-1	LFQ intensity F1 NaCl-2	LFQ intensity F1 NaCl-3	mean F1 NaCl	LFQ intensity NJ4375 Con-1	LFQ intensity NJ4375 Con-2	LFQ intensity NJ4375 Con-3	mean NJ4375 Con	LFQ intensity NJ4375 NaCl-1	LFQ intensity NJ4375 NaCl-2	LFQ intensity NJ4375 NaCl-3	mean NJ4375 NaCl	LFQ intensity MB1942 Con-1	LFQ intensity MB1942 Con-2	LFQ intensity MB1942 Con-3	mean MB1942 Con	LFQ intensity MB1942 NaCl-1	LFQ intensity MB1942 NaCl-2	LFQ intensity MB1942 NaCl-3	mean MB1942 NaCl	LFQ intensity SNP-NaCl-1	LFQ intensity SNP-NaCl-2	LFQ intensity SNP-NaCl-3	mean SNP-NaCl	LFQ intensity cPTIO-NaCl-1	LFQ intensity cPTIO-NaCl-2	LFQ intensity cPTIO-NaCl-3	mean cPTIO-NaCl
A0A068F427	DRP3A	Dynamin-related protein 3A	tr|A0A068F427|A0A068F427_BRANA Dynamin-like protein 2 OS=Brassica napus GN=GSBNAPT00096220001 PE=3 SV=1;tr|A0A078BYH9|A0A078BYH9_BRANA BnaC01g04590D protein OS=Brassica napus GN=BnaC01g04590D PE=3 SV=1;tr|A0A078CER1|A0A078CER1_BRANA BnaA01g03320D protein O	89.415	809	1	0	0	0	0	0	0	0	0	137110000	0	0	4.57033e+07	0	0	0	0	0	0	0	0	0	0	84795000	28265000	0	0	0	0	0	0	0	0
A0A068FAY3	DAP	LL-diaminopimelate aminotransferase (EC 2.6.1.83)	tr|A0A068FAY3|A0A068FAY3_BRANA BnaA01g03290D protein OS=Brassica napus GN=BnaA01g03290D PE=3 SV=1	50.088	458	1	0	0	0	0	2918500	3716900	0	2211800	4963900	0	0	1.65463e+06	0	0	0	0	6142200	0	4649800	3.59733e+06	0	0	0	0	0	0	0	0	0	0	0	0
T2C628	PLDALPHA1	Phospholipase D alpha 1 (AtPLDalpha1) (PLD alpha 1) (EC 3.1.4.4)	tr|T2C628|T2C628_BRANA Phospholipase D OS=Brassica napus GN=PLD3 PE=2 SV=1;tr|R9UMA2|R9UMA2_BRANA Phospholipase D OS=Brassica napus GN=PLD1 PE=2 SV=1;tr|A0A078GZU4|A0A078GZU4_BRANA Phospholipase D OS=Brassica napus GN=BnaC05g37540D PE=3 SV=1;tr|A0A078E6G6|	91.902	810	4	3734900	7694000	0	3.80963e+06	12754000	6502300	6228100	8494800	0	0	0	0	6878900	4059200	19314000	1.0084e+07	0	5647800	6586300	4.07803e+06	18874000	0	0	6.29133e+06	0	0	2485500	828500	28678000	5350800	32941000	2.23233e+07
A0A075M3R5	RBCS-3B	Ribulose bisphosphate carboxylase small chain 3B(RuBisCO small subunit 3B) (EC 4.1.1.39)	tr|A0A075M3R5|A0A075M3R5_BRANA Ribulose bisphosphate carboxylase small chain (Fragment) OS=Brassica napus GN=rbcS PE=3 SV=1	19.797	177	1	0	0	59154000	19718000	0	16912000	3743700000	1.25354e+09	0	0	91324000	3.04413e+07	0	92426000	0	3.08087e+07	51649000	0	0	1.72163e+07	0	57547000	18064000	2.52037e+07	698570	0	5596200	2.09826e+06	220300000	566250000	1002800000	596450000
A0A075M5B7	RBCS-1B	Ribulose bisphosphate carboxylase small chain 1B(RuBisCO small subunit 1B) (EC 4.1.1.39)	tr|A0A075M5B7|A0A075M5B7_BRANA Ribulose bisphosphate carboxylase small chain (Fragment) OS=Brassica napus GN=rbcS PE=3 SV=1;tr|A0A075M5B1|A0A075M5B1_BRANA Ribulose bisphosphate carboxylase small chain (Fragment) OS=Brassica napus GN=rbcS PE=3 SV=1;tr|A0A07	19.865	177	5	9800400000	3625900000	7516700000	6981000000	1510900000	15911000000	14654000000	1.0692e+10	27766000000	37097000000	2459400000	22440800000	34326000000	12632000000	11936000000	1.96313e+10	19385000000	6135600000	8754100000	11424900000	16136000000	16116000000	9494300000	1.39154e+10	101140000000	18960000000	16172000000	45424000000	9526100000	11009000000	11417000000	10650700000
A0A075M9F1	rbcS	Ribule bisphphate carboxylase small chain (Fragment)	tr|A0A075M9F1|A0A075M9F1_BRANA Ribulose bisphosphate carboxylase small chain (Fragment) OS=Brassica napus GN=rbcS PE=3 SV=1;tr|A0A075M5C4|A0A075M5C4_BRANA Ribulose bisphosphate carboxylase small chain (Fragment) OS=Brassica napus GN=rbcS PE=3 SV=1;tr|A0A07	19.908	177	2	1108800000	814760000	1501000000	1141520000	1554200000	877080000	1079500000	1170260000	912780000	455160000	1037400000	801780000	789890000	829470000	439600000	686320000	2816100000	566770000	780760000	1.38788e+09	1046000000	3134000000	2615100000	2.26503e+09	197350000	305590000	1233100000	578680000	1254700000	307960000	0	5.20887e+08
D1L8U6	rps15	30S ribosomal protein S15	tr|D1L8U6|D1L8U6_BRANA 30S ribosomal protein S15 OS=Brassica napus GN=rps15 PE=3 SV=1;tr|A0A1B1Y0B0|A0A1B1Y0B0_BRANA 30S ribosomal protein S15 OS=Brassica napus var. napus GN=rps15 PE=3 SV=1;tr|A0A076VFD2|A0A076VFD2_BRANA 30S ribosomal protein S15, chlorop	10.677	88	3	3433100	1789300	2546500	2.58963e+06	0	2338400	13645000	5327800	0	0	3537000	1179000	2363300	1317300	0	1.22687e+06	0	958980	2332700	1.09723e+06	38627000	31547000	42488000	37554000	1755700	20342000	68182000	3.00932e+07	1585000	2166700	1999800	1.91717e+06
D1L8R4	psbB	Photosystem II CP47 reaction center protein (PSII 47 kDa protein) (Protein CP-47)	tr|D1L8R4|D1L8R4_BRANA Photosystem II CP47 reaction center protein OS=Brassica napus GN=psbB PE=3 SV=1;tr|A0A1B1Y091|A0A1B1Y091_BRANA Photosystem II CP47 reaction center protein OS=Brassica napus var. napus GN=psbB PE=3 SV=1;tr|A0A076VFP7|A0A076VFP7_BRANA	54.71	494	5	7893300	5070400	10953000	7.97223e+06	13092000	10227000	13975000	1.24313e+07	5464700	5348500	5901900	5571700	21804000	13969000	16854000	1.75423e+07	13034000	7610100	11255000	1.0633e+07	16563000	17583000	4215300	12787100	2410100000	74543000	56837000	847160000	69086000	209760000	136640000	1.38495e+08
A0A1B1Y101	psaJ	Photosystem I reaction center subunit IX (PSI-J)	tr|A0A1B1Y101|A0A1B1Y101_BRANA Photosystem I reaction center subunit IX OS=Brassica napus var. napus GN=psaJ PE=3 SV=1;tr|A0A076VHN4|A0A076VHN4_BRANA Photosystem I reaction center subunit IX OS=Brassica napus GN=psaJ PE=3 SV=1	4.8167	42	1	60470000	52408000	25747000	4.62083e+07	4336200	220460	26956000	10504220	0	1869100	55884000	1.9251e+07	103830000	12270000	4261300	4.01204e+07	0	0	0	0	66787000	47383000	0	3.80567e+07	3661200	6133200	30060000	13284800	0	0	53795000	1.79317e+07
A0A1B1XZJ2	rps8	30S ribosomal protein S8	tr|A0A1B1XZJ2|A0A1B1XZJ2_BRANA Ribosomal protein S8 OS=Brassica napus var. napus GN=rps8 PE=3 SV=1;tr|A0A076VHS8|A0A076VHS8_BRANA 30S ribosomal protein S8, chloroplastic OS=Brassica napus GN=rps8 PE=3 SV=1;tr|D1L8S3|D1L8S3_BRANA Ribosomal protein S8 OS=Bra	15.451	134	4	41143000	0	0	1.37143e+07	23952000	55925000	66801000	4.88927e+07	0	15644000	0	5.21467e+06	0	20134000	0	6.71133e+06	0	0	16390000	5.46333e+06	41037000	0	0	13679000	0	64492000	76712000	47068000	106330000	49172000	29020000	6.15073e+07
A0A078CLW1	P56763	DNA-directed RNA polymerase	tr|A0A078CLW1|A0A078CLW1_BRANA BnaC04g37990D protein OS=Brassica napus GN=BnaC04g37990D PE=4 SV=1;tr|A0A078I8N2|A0A078I8N2_BRANA BnaCnng12670D protein OS=Brassica napus GN=BnaCnng12670D PE=3 SV=1;tr|A0A078FXW2|A0A078FXW2_BRANA BnaC01g27060D protein OS=Bras	59.198	527	1	0	0	0	0	0	0	1701900	567300	0	0	0	0	0	1832800	0	610933	0	0	0	0	2722400	0	3624100	2115500	6291100	2903100	2061800	3752000	2096800	0	1302400	1.13307e+06
A0A078JY23	GRF3	14-3-3-like protein GF14 psi (General regulatory factor 3) (Protein RARE COLD INDUCIBLE 1A)	tr|A0A078JY23|A0A078JY23_BRANA BnaCnng72220D protein OS=Brassica napus GN=BnaCnng72220D PE=3 SV=1;tr|A0A078BS21|A0A078BS21_BRANA BnaA07g14450D protein OS=Brassica napus GN=BnaA07g14450D PE=3 SV=1;tr|C0KJK8|C0KJK8_BRANA 1433-3 OS=Brassica napus PE=2 SV=1	28.891	257	1	0	0	0	0	0	8785100	0	2.92837e+06	0	0	0	0	0	0	0	0	0	0	0	0	0	0	6883200	2294400	9806300	0	0	3.26877e+06	5718200	0	0	1.90607e+06
A0A078BSD8	Q93ZG7	DEAD-box ATP-dependent RNA helicase 38	tr|A0A078BSD8|A0A078BSD8_BRANA BnaA07g15960D protein OS=Brassica napus GN=BnaA07g15960D PE=4 SV=1;tr|A0A078FK29|A0A078FK29_BRANA BnaC06g14380D protein OS=Brassica napus GN=BnaC06g14380D PE=4 SV=1;tr|A0A078E2N5|A0A078E2N5_BRANA BnaC04g27610D protein OS=Bras	53.059	472	1	0	0	0	0	0	0	0	0	0	0	0	0	0	0	0	0	0	0	0	0	0	0	0	0	53572000	0	0	1.78573e+07	0	0	0	0
A0A078BSG1	Q42586	Uridine 5'-monophosphate synthase UMP synthase	tr|A0A078BSG1|A0A078BSG1_BRANA BnaA07g16410D protein OS=Brassica napus GN=BnaA07g16410D PE=3 SV=1;tr|A0A078F7E9|A0A078F7E9_BRANA BnaC06g15260D protein OS=Brassica napus GN=BnaC06g15260D PE=3 SV=1;tr|A0A078CGZ8|A0A078CGZ8_BRANA BnaA04g04090D protein OS=Bras	51.431	470	2	1240100	1827800	0	1.02263e+06	0	1778400	0	592800	0	0	0	0	0	4079900	2566700	2.21553e+06	0	1211100	2192300	1.13447e+06	0	0	0	0	0	0	2376300	792100	0	4449800	0	1.48327e+06
A0A078BSH8	FER3	Ferritin	tr|A0A078BSH8|A0A078BSH8_BRANA Ferritin OS=Brassica napus GN=BnaA07g16710D PE=3 SV=1;tr|A0A078GZY9|A0A078GZY9_BRANA Ferritin OS=Brassica napus GN=BnaC06g15730D PE=3 SV=1;tr|A0A078GPX1|A0A078GPX1_BRANA Ferritin OS=Brassica napus GN=BnaA09g35550D PE=3 SV=1;t	27.469	245	1	0	264380000	376580000	2.13653e+08	635160000	0	582880000	4.06013e+08	251810000	0	0	8.39367e+07	0	0	0	0	0	43600000	60948000	3.48493e+07	0	0	0	0	0	0	65169000	21723000	34584000	0	25360000	1.99813e+07
A0A078CF58	RPL24A	60S ribosomal protein L24-1	tr|A0A078CF58|A0A078CF58_BRANA BnaC08g24200D protein OS=Brassica napus GN=BnaC08g24200D PE=4 SV=1;tr|A0A078H6L6|A0A078H6L6_BRANA BnaC04g08700D protein OS=Brassica napus GN=BnaC04g08700D PE=4 SV=1;tr|A0A078CJ12|A0A078CJ12_BRANA BnaA05g07740D protein OS=Bras	14.594	130	1	0	0	2411400	803800	0	22300000	0	7.43333e+06	0	0	0	0	0	0	0	0	0	21473000	0	7.15767e+06	262660000	66507000	72683000	133950000	0	0	0	0	0	0	14408000	4.80267e+06
A0A078BSK3	F5K20_290	Adenine nucleotide alpha hydrolases-like superfamily protein	tr|A0A078BSK3|A0A078BSK3_BRANA BnaA07g16200D protein OS=Brassica napus GN=BnaA07g16200D PE=4 SV=1	17.657	159	3	4711000	0	0	1.57033e+06	1649300	0	29003000	1.02174e+07	25722000	15713000	11357000	1.75973e+07	20647000	9985900	801130	10478010	30869000	10119000	3618100	14868700	4980000	5545400	0	3.50847e+06	0	5475300	7085300	4.18687e+06	94355000	82679000	241690000	1.39575e+08
A0A078BT17	P49692	60S ribosomal protein L7a-1	tr|A0A078BT17|A0A078BT17_BRANA BnaA07g19460D protein OS=Brassica napus GN=BnaA07g19460D PE=4 SV=1;tr|A0A078E3A7|A0A078E3A7_BRANA BnaA04g29590D protein OS=Brassica napus GN=BnaC04g21170D PE=4 SV=1;tr|A0A078DIV0|A0A078DIV0_BRANA BnaA04g00350D protein OS=Bras	50.932	443	1	1407600	0	1475300	960967	0	0	0	0	7181600	2172800	3415300	4.25657e+06	0	0	0	0	2736300	1982100	1858200	2192200	0	0	0	0	0	0	0	0	17867000	0	26320000	14729000
A0A078EB29	MTHFR1	Methylenetetrahydrofolate reductase	tr|A0A078EB29|A0A078EB29_BRANA Methylenetetrahydrofolate reductase OS=Brassica napus GN=BnaC06g17620D PE=3 SV=1;tr|A0A078BT75|A0A078BT75_BRANA Methylenetetrahydrofolate reductase OS=Brassica napus GN=BnaA07g18600D PE=3 SV=1;tr|A0A078HWP8|A0A078HWP8_BRANA M	66.322	592	5	31476000	0	21456000	17644000	4312300	0	11460000	5.25743e+06	14660000	28728000	23715000	2.23677e+07	11933000	8816700	0	6.91657e+06	10080000	33170000	78925000	40725000	46998000	39904000	8455500	3.17858e+07	0	46833000	58716000	35183000	5595800	15731000	9437300	10254700
A0A078CCD5	HAT	Zinc finger BED domain-containing protein DAYSLEEPER	tr|A0A078CCD5|A0A078CCD5_BRANA BnaA04g09140D protein OS=Brassica napus GN=BnaA04g09140D PE=4 SV=1;tr|A0A078HGY9|A0A078HGY9_BRANA UDP-glucose 6-dehydrogenase OS=Brassica napus GN=BnaC06g12620D PE=3 SV=1;tr|A0A078BT80|A0A078BT80_BRANA UDP-glucose 6-dehydroge	27.768	258	4	47231000	0	18931000	22054000	38372000	13038000	25932000	2.57807e+07	7006900	5268200	9479900	7.25167e+06	2728900	12669000	5251200	6.88303e+06	7642300	12973000	12804000	1.11398e+07	0	6756900	30119000	1.2292e+07	0	10919000	12682000	7867000	5010000	6793600	7025600	6276400
A0A078DJ39	NUDT3	Nudix hydrolase 3	tr|A0A078DJ39|A0A078DJ39_BRANA BnaC06g40030D protein OS=Brassica napus GN=BnaC06g40030D PE=4 SV=1;tr|A0A078CRI1|A0A078CRI1_BRANA BnaC06g19660D protein OS=Brassica napus GN=BnaC06g19660D PE=4 SV=1;tr|A0A078BT83|A0A078BT83_BRANA BnaA07g20210D protein OS=Bras	88.072	776	1	2070800	0	0	690267	0	0	0	0	0	0	0	0	0	0	0	0	0	0	0	0	0	0	0	0	0	0	0	0	0	0	0	0
A0A078JXE7	PSBR	Photosystem II 10 kDa polypeptide	tr|A0A078JXE7|A0A078JXE7_BRANA BnaAnng40550D protein OS=Brassica napus GN=BnaAnng40550D PE=4 SV=1;tr|A0A078DGV5|A0A078DGV5_BRANA BnaC06g39450D protein OS=Brassica napus GN=BnaC06g39450D PE=4 SV=1;tr|A0A078CRC4|A0A078CRC4_BRANA BnaC06g20160D protein OS=Bras	14.576	140	1	64540000	103440000	0	5.59933e+07	40967000	49329000	48690000	4.63287e+07	0	0	142130000	4.73767e+07	81442000	52627000	71900000	6.86563e+07	0	0	47861000	1.59537e+07	16480000	0	39165000	1.85483e+07	12494000	72330000	55100000	4.66413e+07	27840000	33600000	0	20480000
A0A078CPY9	GSTU19	Glutathione S-transferase U19	tr|A0A078CPY9|A0A078CPY9_BRANA BnaC06g20420D protein OS=Brassica napus GN=BnaC06g20420D PE=4 SV=1;tr|A0A078BTD0|A0A078BTD0_BRANA BnaA07g20560D protein OS=Brassica napus GN=BnaA07g20560D PE=4 SV=1	25.657	219	3	21049000	12283000	29067000	2.07997e+07	20140000	52225000	46371000	3.95787e+07	9560100	10156000	9321400	9.67917e+06	13555000	27046000	8627700	1.64096e+07	25655000	20590000	11210000	1.91517e+07	54911000	37153000	17976000	36680000	956620000	36356000	33293000	3.4209e+08	47736000	67143000	93560000	6.94797e+07
A0A078BTF3	LOX2	Lipoxygenase 2	tr|A0A078BTF3|A0A078BTF3_BRANA Lipoxygenase OS=Brassica napus GN=BnaA07g19600D PE=3 SV=1	103.09	904	8	333760000	489280000	342410000	3.88483e+08	658150000	576430000	375810000	5.36797e+08	47304000	14951000	6342200	2.28657e+07	249360000	598100000	215270000	3.54243e+08	258710000	439750000	126400000	2.74953e+08	192240000	261250000	531050000	328180000	636220000	487000000	278020000	467080000	295340000	379330000	350210000	3.41627e+08
A0A078CW68	FHY1C	Flavin mononucleotide hydrolase 1	tr|A0A078CW68|A0A078CW68_BRANA BnaC06g18900D protein OS=Brassica napus GN=BnaC06g18900D PE=4 SV=1;tr|A0A078BTF8|A0A078BTF8_BRANA BnaA07g19650D protein OS=Brassica napus GN=BnaA07g19650D PE=4 SV=1	28.649	250	2	0	0	0	0	0	0	7215400	2.40513e+06	0	0	0	0	9401100	0	1595700	3665600	0	0	1577200	525733	6985600	0	11776000	6.25387e+06	0	4084900	7928200	4.00437e+06	1787100	1747700	1908600	1.81447e+06
A0A078D9U7	SYGM2	Glycine--tRNA ligase	tr|A0A078D9U7|A0A078D9U7_BRANA BnaC06g22570D protein OS=Brassica napus GN=BnaC06g22570D PE=4 SV=1;tr|A0A078DEZ9|A0A078DEZ9_BRANA BnaC06g22560D protein OS=Brassica napus GN=BnaC06g22560D PE=4 SV=1;tr|A0A078BU29|A0A078BU29_BRANA BnaA07g21850D protein OS=Bras	25.927	232	1	0	183000	0	61000	0	281400	397670	226357	0	0	0	0	238710	289170	242800	256893	297820	138550	0	145457	0	0	0	0	0	0	200550	66850	257000	255760	170240	227667
A0A078C4P1	SYFM	Phenylalanine--tRNA ligase	tr|A0A078C4P1|A0A078C4P1_BRANA BnaC08g29030D protein OS=Brassica napus GN=BnaC08g29030D PE=4 SV=1;tr|A0A078EY24|A0A078EY24_BRANA BnaA09g37290D protein OS=Brassica napus GN=BnaA09g37290D PE=4 SV=1;tr|A0A078E836|A0A078E836_BRANA BnaC06g16310D protein OS=Bras	48.876	425	1	0	38166000	0	12722000	22897000	9931000	0	1.09427e+07	0	0	0	0	0	11861000	14254000	8705000	0	0	0	0	0	44338000	27861000	2.40663e+07	459610000	0	0	1.53203e+08	0	0	0	0
A0A078IFN1	RH37	Secondary accession number(s): O23150, Q9SU73	tr|A0A078IFN1|A0A078IFN1_BRANA BnaA04g24560D protein OS=Brassica napus GN=BnaA04g24560D PE=4 SV=1;tr|A0A078EBY1|A0A078EBY1_BRANA BnaC06g16650D protein OS=Brassica napus GN=BnaC06g16650D PE=4 SV=1;tr|A0A078EZM8|A0A078EZM8_BRANA BnaA09g37460D protein OS=Bras	45.447	418	1	2117700	1556300	1919300	1.86443e+06	0	0	4365200	1.45507e+06	1915800	0	2412600	1442800	1852500	2132600	0	1.32837e+06	0	2471000	1945700	1.47223e+06	1862100	2574300	0	1478800	0	2272000	2868400	1.71347e+06	9424200	4373900	3923300	5.90713e+06
Q58QP9	GLP1	Germin-like protein subfamily T member 1	tr|Q58QP9|Q58QP9_BRANA Oxalic acid oxidase OS=Brassica napus PE=3 SV=1;sp|P46271|GLP1_BRANA Germin-like protein 1 OS=Brassica napus GN=GER1 PE=2 SV=1;tr|A0A078FE00|A0A078FE00_BRANA BnaC06g24160D protein OS=Brassica napus GN=BnaC06g24160D PE=3 SV=1;tr|A0A07	21.504	207	1	8652900	19271000	0	9.30797e+06	10870000	11602000	0	7.49067e+06	0	40900000	0	1.36333e+07	0	11668000	10244000	7304000	0	8504900	0	2.83497e+06	20223000	32725000	0	1.76493e+07	0	6076100	0	2.02537e+06	13694000	7208000	0	6.96733e+06
A0A078IJJ1	VHA-D	V-type proton ATPase subunit D (V-ATPase subunit D)	tr|A0A078IJJ1|A0A078IJJ1_BRANA BnaA09g55270D protein OS=Brassica napus GN=BnaA09g55270D PE=4 SV=1;tr|A0A078EIM2|A0A078EIM2_BRANA BnaC04g23410D protein OS=Brassica napus GN=BnaC04g23410D PE=4 SV=1;tr|A0A078E888|A0A078E888_BRANA BnaC06g16860D protein OS=Bras	22.427	202	1	0	61296000	0	20432000	21524000	0	0	7.17467e+06	0	0	0	0	0	0	0	0	0	0	0	0	0	86086000	0	2.86953e+07	0	0	0	0	0	94253000	0	3.14177e+07
A0A078K352	RPL38A	60S ribosomal protein L38	tr|A0A078K352|A0A078K352_BRANA BnaCnng77070D protein OS=Brassica napus GN=BnaCnng77070D PE=3 SV=1;tr|A0A078DCF4|A0A078DCF4_BRANA BnaC03g52160D protein OS=Brassica napus GN=BnaC03g52160D PE=3 SV=1;tr|A0A078GYU8|A0A078GYU8_BRANA BnaA04g25080D protein OS=Bras	7.9934	68	1	173870000	266940000	0	1.46937e+08	0	143540000	155110000	99550000	270690000	0	0	90230000	0	0	0	0	0	93545000	0	3.11817e+07	0	0	28292000	9.43067e+06	0	29152000	20812000	1.66547e+07	47320000	34365000	63586000	4.84237e+07
A0A078J3A2	PBF1	Proteasome subunit beta type (EC 3.4.25.1)	tr|A0A078J3A2|A0A078J3A2_BRANA Proteasome subunit beta type OS=Brassica napus GN=BnaCnng31140D PE=3 SV=1;tr|A0A078IMN6|A0A078IMN6_BRANA Proteasome subunit beta type OS=Brassica napus GN=BnaA09g38940D PE=3 SV=1;tr|A0A078DIQ6|A0A078DIQ6_BRANA Proteasome subu	24.583	223	2	9690600	0	14445000	8045200	11285000	0	0	3.76167e+06	0	0	0	0	0	0	0	0	0	0	0	0	0	0	12697000	4.23233e+06	0	0	10860000	3620000	0	0	0	0
A0A078GF67	CP12-2	Calvin cycle protein CP12-2(CP12 domain-containing protein 2)	tr|A0A078GF67|A0A078GF67_BRANA BnaC06g18520D protein OS=Brassica napus GN=BnaC06g18520D PE=4 SV=1;tr|A0A078BUJ4|A0A078BUJ4_BRANA BnaA07g19320D protein OS=Brassica napus GN=BnaA07g19320D PE=4 SV=1;tr|A0A078CID7|A0A078CID7_BRANA BnaC08g32210D protein OS=Bras	13.935	129	2	61769000	102680000	62642000	75697000	64772000	47484000	41479000	51245000	59379000	153500000	84332000	9.90703e+07	36626000	32991000	13626000	2.77477e+07	84098000	70883000	53867000	69616000	62666000	49571000	36431000	49556000	0	7072700	29158000	12076900	9162300	7610600	7973100	8.24867e+06
A0A078HYF5	TS1	Threonine synthase 1(EC 4.2.3.1)	tr|A0A078HYF5|A0A078HYF5_BRANA BnaA01g07140D protein OS=Brassica napus GN=BnaA01g07140D PE=4 SV=1;tr|A0A078BUV3|A0A078BUV3_BRANA BnaC01g08620D protein OS=Brassica napus GN=BnaC01g08620D PE=4 SV=1	57.774	525	1	0	1297200	0	432400	0	253710000	0	84570000	0	0	0	0	13464000	0	0	4488000	0	0	0	0	130850000	0	0	4.36167e+07	0	0	0	0	21355000	0	0	7.11833e+06
C7E640	STR1	Thiosulfate/3-mercaptopyruvate sulfurtransferase 1(EC 2.8.1.1)	tr|C7E640|C7E640_BRANA Sulfurtransferase OS=Brassica napus GN=ST1 PE=2 SV=1;tr|A0A078CRE5|A0A078CRE5_BRANA Sulfurtransferase OS=Brassica napus GN=BnaC06g19960D PE=4 SV=1;tr|A0A078BUW1|A0A078BUW1_BRANA Sulfurtransferase OS=Brassica napus GN=BnaA07g20420D PE	41.508	379	1	834000	1128600	1444500	1.13582e+06	1184900	1092000	1281500	1.18613e+06	1418900	1568400	1471100	1.48613e+06	1194900	917580	830210	980897	1919900	0	0	639967	351100	954900	792000	699333	1278200	1106900	1296600	1.22723e+06	3507500	2507200	1757200	2.59063e+06
Q2EGT6	GSTU20	Glutathione S-transferase U20 (AtGSTU20) (EC 2.5.1.18)	tr|Q2EGT6|Q2EGT6_BRANA BnaC06g20430D protein OS=Brassica napus GN=BnaC06g20430D PE=2 SV=1;tr|A0A078BV06|A0A078BV06_BRANA BnaA07g20570D protein OS=Brassica napus GN=BnaA07g20570D PE=4 SV=1	24.731	217	3	64963000	94138000	110940000	9.00137e+07	0	176940000	119240000	9.87267e+07	96499000	156190000	41353000	98014000	35004000	34412000	0	2.31387e+07	99065000	42192000	33715000	58324000	39642000	87526000	70204000	6.57907e+07	2967300	65407000	129080000	65818100	61678000	64125000	66071000	63958000
A0A078BV11	ACA10	Calcium-transporting ATPase 10	tr|A0A078BV11|A0A078BV11_BRANA Calcium-transporting ATPase OS=Brassica napus GN=BnaC01g08580D PE=3 SV=1;tr|A0A078I1R7|A0A078I1R7_BRANA Calcium-transporting ATPase OS=Brassica napus GN=BnaA01g07100D PE=3 SV=1;tr|A0A078GYG2|A0A078GYG2_BRANA Calcium-transport	115.58	1058	1	0	0	0	0	0	0	0	0	0	0	0	0	0	0	114370	38123.3	0	0	0	0	0	0	0	0	0	0	160050	53350	1158600	1143600	1304800	1.20233e+06
A0A078GSK1	XTH22	Xyloglucan endotransglucosylase/hydrolase protein 22 (At-XTH22) (EC 2.4.1.207)	tr|A0A078GSK1|A0A078GSK1_BRANA Xyloglucan endotransglucosylase/hydrolase OS=Brassica napus GN=BnaA01g06750D PE=3 SV=1;tr|A0A078BV43|A0A078BV43_BRANA Xyloglucan endotransglucosylase/hydrolase OS=Brassica napus GN=BnaC01g08130D PE=3 SV=1;tr|A0A078CB44|A0A078	31.837	282	2	0	0	2055700	685233	0	0	0	0	3824800	2480200	4172500	3492500	10518000	42848000	477620000	1.76995e+08	9571000	0	0	3.19033e+06	0	0	4925900	1.64197e+06	0	0	0	0	0	0	1753400	584467
A0A078GQL6	DRP1A	Dynamin-related protein 1A (Dynamin-like protein 1)	tr|A0A078GQL6|A0A078GQL6_BRANA BnaUnng00110D protein OS=Brassica napus GN=BnaUnng00110D PE=3 SV=1;tr|A0A078FK65|A0A078FK65_BRANA BnaC06g13930D protein OS=Brassica napus GN=BnaC06g13930D PE=3 SV=1;tr|A0A078EF82|A0A078EF82_BRANA BnaC04g34590D protein OS=Bras	68.172	610	2	1704800	16167000	7494600	8.45547e+06	29091000	1974400	1396100	10820500	16150000	0	5374500	7.17483e+06	6902100	4024400	11797000	7574500	0	1505300	2767500	1.42427e+06	6244000	2621100	0	2.95503e+06	0	18062000	11471000	9.84433e+06	11452000	20330000	27903000	19895000
A0A078F3E0	At3g53970	Proteasome inhibitor-like protein	tr|A0A078F3E0|A0A078F3E0_BRANA BnaC06g14970D protein OS=Brassica napus GN=BnaC06g14970D PE=4 SV=1;tr|A0A078BV86|A0A078BV86_BRANA BnaA07g16190D protein OS=Brassica napus GN=BnaA07g16190D PE=4 SV=1	32.37	300	1	9859000	0	7038200	5632400	17316000	0	15461000	1.09257e+07	5355600	7873300	7630700	6953200	0	0	0	0	3846900	23371000	0	9.07263e+06	0	5910900	19938000	8616300	0	16697000	13256000	9.98433e+06	11643000	69780000	7769700	29730900
A0A078BV89	SCPL29	Serine carboxypeptidase-like 29	tr|A0A078BV89|A0A078BV89_BRANA Carboxypeptidase OS=Brassica napus GN=BnaC01g07580D PE=3 SV=1;tr|A0A078GRW5|A0A078GRW5_BRANA Carboxypeptidase OS=Brassica napus GN=BnaA01g06330D PE=3 SV=1	53.447	481	6	68438000	0	181030000	83156000	56928000	100530000	22938000	60132000	293860000	62175000	364720000	2.40252e+08	146590000	165510000	70147000	1.27416e+08	270150000	116100000	58781000	1.48344e+08	71164000	223720000	155560000	150148000	715420000	102090000	59887000	2.92466e+08	54307000	54444000	128210000	78987000
A0A078F2D4	GRXS14	Monothiol glutaredoxin-S14(AtGRXcp) (AtGrxS14)	tr|A0A078F2D4|A0A078F2D4_BRANA BnaC06g15480D protein OS=Brassica napus GN=BnaC06g15480D PE=4 SV=1;tr|A0A078BVA9|A0A078BVA9_BRANA BnaA07g16540D protein OS=Brassica napus GN=BnaA07g16540D PE=4 SV=1;tr|A0A078CT07|A0A078CT07_BRANA BnaA09g34730D protein OS=Bras	20.048	181	2	0	5921600	6353700	4.09177e+06	35207000	58191000	51130000	48176000	0	0	45508000	1.51693e+07	83482000	13427000	0	32303000	0	0	0	0	55928000	39186000	0	3.17047e+07	0	0	44204000	1.47347e+07	35315000	23079000	0	1.94647e+07
A0A078IMW8	CRD1	Dicarboxylate diiron protein, putative (Crd1)	tr|A0A078IMW8|A0A078IMW8_BRANA BnaCnng20460D protein OS=Brassica napus GN=BnaCnng20460D PE=3 SV=1;tr|A0A078C7H0|A0A078C7H0_BRANA BnaC08g27800D protein OS=Brassica napus GN=BnaC08g27800D PE=3 SV=1;tr|A0A078BVE1|A0A078BVE1_BRANA BnaA07g17040D protein OS=Bras	47.68	409	3	12278000	6692300	4993300	7.98787e+06	12491000	58773000	0	2.37547e+07	0	0	0	0	11637000	0	30484000	1.40403e+07	13493000	7351100	10127000	10323700	3400700	15279000	8814700	9164800	945300000	1531000	23368000	3.234e+08	9107800	8294700	27779000	15060500
A0A078BVH9	At4g37010	PDE334	tr|A0A078BVH9|A0A078BVH9_BRANA BnaC01g06270D protein OS=Brassica napus GN=BnaC01g06270D PE=3 SV=1	23.437	216	3	0	2833100	1998400	1610500	961180	2331100	1206000	1.49943e+06	2528900	3188600	2344800	2.68743e+06	2789900	2110100	4891900	3.26397e+06	3469200	3163600	1749900	2.79423e+06	1675000	2106300	0	1.26043e+06	3439100	27580000	1921600	1.09802e+07	2232900	0	1351200	1194700
A0A078BVU6	GCSP1	Glycine dehydrogenase	tr|A0A078BVU6|A0A078BVU6_BRANA Glycine cleavage system P protein OS=Brassica napus GN=BnaC01g05230D PE=3 SV=1	114.28	1045	1	0	0	2242600000	7.47533e+08	0	32097000	50736000	27611000	130560000	0	0	43520000	545730000	75138000	197920000	2.72929e+08	0	0	0	0	0	25675000	0	8.55833e+06	0	0	46257000	15419000	17555000	8910000	0	8.82167e+06
A0A078FK59	At4g33110	Uncharacterized protein AT4g33110 (Uncharacterized protein F4I10.40)	tr|A0A078FK59|A0A078FK59_BRANA BnaA03g52340D protein OS=Brassica napus GN=BnaA03g52340D PE=4 SV=1;tr|A0A078CEL1|A0A078CEL1_BRANA BnaA01g03770D protein OS=Brassica napus GN=BnaA01g03770D PE=4 SV=1;tr|A0A078BVW0|A0A078BVW0_BRANA BnaC01g05130D protein OS=Bras	41.406	355	1	0	0	0	0	13517000	0	0	4.50567e+06	0	0	0	0	28849000	0	0	9.61633e+06	0	0	0	0	0	0	0	0	302440000	0	0	1.00813e+08	0	0	0	0
A0A078BVX4	At4g33150	Lysine-ketoglutarate reductase/saccharopine dehydrogenase bifunctional enzyme	tr|A0A078BVX4|A0A078BVX4_BRANA BnaC01g05030D protein OS=Brassica napus GN=BnaC01g05030D PE=4 SV=1;tr|A0A078CGS5|A0A078CGS5_BRANA BnaA01g03680D protein OS=Brassica napus GN=BnaA01g03680D PE=4 SV=1	116.41	1054	7	1716500	3641300	1680500	2346100	0	0	0	0	10657000	12920000	18510000	14029000	4081300	4340100	0	2.80713e+06	0	9416400	13673000	7.69647e+06	0	0	0	0	0	0	0	0	91199000	26051000	21985000	4.64117e+07
A0A078BW36	PTA16	Protein plastid transcriptionally active 16	tr|A0A078BW36|A0A078BW36_BRANA BnaC01g24850D protein OS=Brassica napus GN=BnaC01g24850D PE=4 SV=1	53.012	500	2	145830000	0	20589000	55473000	23020000	22053000	2790000	1.59543e+07	1117600	0	0	372533	0	46889000	39193000	28694000	0	0	20722000	6.90733e+06	78595000	134750000	126500000	1.13282e+08	0	0	0	0	19758000	0	0	6586000
A0A078IAL6	At4g34450	Coatomer subunit gamma	tr|A0A078IAL6|A0A078IAL6_BRANA Coatomer subunit gamma OS=Brassica napus GN=BnaC03g66090D PE=3 SV=1;tr|A0A078CMH3|A0A078CMH3_BRANA Coatomer subunit gamma OS=Brassica napus GN=BnaA08g11170D PE=3 SV=1;tr|A0A078CEX8|A0A078CEX8_BRANA Coatomer subunit gamma OS=B	98.361	886	1	0	0	0	0	0	12089000	0	4.02967e+06	0	19201000	0	6.40033e+06	0	0	0	0	0	0	0	0	19469000	0	0	6.48967e+06	0	0	4540900	1.51363e+06	164220000	0	0	54740000
A0A078BW91	ACAP1	Cyclase-associated protein 1	tr|A0A078BW91|A0A078BW91_BRANA Adenylyl cyclase-associated protein OS=Brassica napus GN=BnaC01g03880D PE=3 SV=1;tr|A0A078CK29|A0A078CK29_BRANA Adenylyl cyclase-associated protein OS=Brassica napus GN=BnaA01g02640D PE=3 SV=1	51.173	480	2	2345000	3053000	2993600	2797200	330450	1836100	2958800	1708450	4629800	9254400	4129900	6004700	3476500	2256500	2086300	2.60643e+06	3031700	2728000	1660600	2.47343e+06	1566400	1787000	1608300	1653900	0	1970200	2961900	1.64403e+06	4423800	4612000	5593100	4876300
A0A078HW79	AKR2A	Ankyrin repeat domain-containing protein 2A (AtAKR2)	tr|A0A078HW79|A0A078HW79_BRANA BnaC03g62300D protein OS=Brassica napus GN=BnaC03g62300D PE=4 SV=1;tr|A0A078C6A0|A0A078C6A0_BRANA BnaC07g45580D protein OS=Brassica napus GN=BnaC07g45580D PE=4 SV=1;tr|A0A078CHE5|A0A078CHE5_BRANA BnaA01g01980D protein OS=Bras	36.154	337	1	2854700	0	0	951567	0	102700	100620	67773.3	0	0	0	0	0	149120	154900	101340	0	0	0	0	2207600	0	542570	916723	0	3430900	14653000	6.02797e+06	4155300	6125100	154220	3.47821e+06
A0A078D486	At2g27420	Cysteine proteinase	tr|A0A078D486|A0A078D486_BRANA BnaA01g20790D protein OS=Brassica napus GN=BnaA01g20790D PE=3 SV=1;tr|A0A078C0A6|A0A078C0A6_BRANA BnaC01g26060D protein OS=Brassica napus GN=BnaC01g26060D PE=3 SV=1;tr|A0A078BWG2|A0A078BWG2_BRANA BnaC01g26050D protein OS=Bras	38.204	343	1	0	0	0	0	0	0	0	0	0	0	0	0	0	0	0	0	0	0	0	0	0	0	0	0	0	0	0	0	0	0	0	0
A0A078DBY5	TIM13	Mitochondrial import inner membrane translocase subunit TIM13	tr|A0A078DBY5|A0A078DBY5_BRANA BnaC06g22550D protein OS=Brassica napus GN=BnaC06g22550D PE=3 SV=1;tr|A0A078BWG4|A0A078BWG4_BRANA BnaA07g21840D protein OS=Brassica napus GN=BnaA07g21840D PE=3 SV=1	9.5037	87	1	0	1016300	1368000	794767	98890	0	0	32965.3	1480400	519060	2737900	1579120	543680	326310	556830	475607	1336200	0	566620	634273	496900	765600	456700	573067	0	0	0	0	8099000	6770700	6080900	6.98353e+06
A0A078GVP9	RPL8C	60S ribosomal protein L8-3	tr|A0A078GVP9|A0A078GVP9_BRANA BnaA06g25400D protein OS=Brassica napus GN=BnaA06g25400D PE=4 SV=1;tr|A0A078CFF8|A0A078CFF8_BRANA BnaA01g01470D protein OS=Brassica napus GN=BnaA01g01470D PE=4 SV=1;tr|A0A078HKL0|A0A078HKL0_BRANA BnaA07g02120D protein OS=Bras	16.228	154	1	4818700	1109000	5649300	3859000	134680	671810	1284100	696863	1898200	0	0	632733	751510	822900	1069200	881203	0	293920	0	97973.3	3309600	2690800	1910400	2.63693e+06	0	5006100	29643000	11549700	7180600	8082400	762720	5.34191e+06
A0A078HQY4	RPS10B	RNA binding Plectin/S10 domain-containing protein	tr|A0A078HQY4|A0A078HQY4_BRANA BnaA04g11190D protein OS=Brassica napus GN=BnaA04g11190D PE=4 SV=1;tr|A0A078HBA9|A0A078HBA9_BRANA BnaC06g13490D protein OS=Brassica napus GN=BnaC06g13490D PE=4 SV=1;tr|A0A078I0T4|A0A078I0T4_BRANA BnaCnng11230D protein OS=Bras	21.779	195	2	0	73999000	35546000	36515000	91448000	0	42674000	4.47073e+07	102830000	94217000	0	6.56823e+07	0	0	0	0	54481000	0	36144000	3.02083e+07	0	0	29571000	9857000	0	17750000	0	5.91667e+06	17104000	0	33012000	1.67053e+07
A0A078BWX9	At4g37550	Acetamidase/Formamidase family protein	tr|A0A078BWX9|A0A078BWX9_BRANA BnaC01g01370D protein OS=Brassica napus GN=BnaC01g01370D PE=4 SV=1	49.864	452	1	366000	433000	709000	503183	0	230860	260850	163903	651510	0	0	217170	341330	232760	0	191363	0	0	0	0	259270	254400	0	171223	0	0	383540	127847	569470	535440	372200	492370
A0A078BWZ6	ASP5	Aspartate aminotransferase	tr|A0A078BWZ6|A0A078BWZ6_BRANA Aspartate aminotransferase OS=Brassica napus GN=BnaC01g06460D PE=4 SV=1;tr|A0A078FKE4|A0A078FKE4_BRANA Aspartate aminotransferase OS=Brassica napus GN=BnaA03g51850D PE=4 SV=1	56.69	513	1	19371000	0	0	6457000	0	0	0	0	0	0	0	0	16799000	0	0	5.59967e+06	33769000	0	0	1.12563e+07	15222000	14114000	11840000	1.37253e+07	0	0	0	0	0	57475000	26305000	2.79267e+07
A0A078JC84	DJA5	Molecular chaperone Hsp40/DnaJ family protein	tr|A0A078JC84|A0A078JC84_BRANA BnaA01g34580D protein OS=Brassica napus GN=BnaA01g34580D PE=3 SV=1;tr|A0A078BX30|A0A078BX30_BRANA BnaC01g00820D protein OS=Brassica napus GN=BnaC01g00820D PE=3 SV=1;tr|A0A078DQF1|A0A078DQF1_BRANA BnaC04g34720D protein OS=Bras	52.579	486	2	0	0	0	0	0	0	0	0	0	0	0	0	0	1824000	0	608000	0	0	0	0	2133100	1745100	1463700	1.78063e+06	0	113540000	14740000	42760000	2502000	2915000	0	1.80567e+06
A0A078BX32	DHS1	Phospho-2-dehydro-3-deoxyheptonate aldolase 1	tr|A0A078BX32|A0A078BX32_BRANA Phospho-2-dehydro-3-deoxyheptonate aldolase OS=Brassica napus GN=BnaC01g00830D PE=3 SV=1;tr|A0A078JQN4|A0A078JQN4_BRANA Phospho-2-dehydro-3-deoxyheptonate aldolase OS=Brassica napus GN=BnaA01g34720D PE=3 SV=1	53.344	483	1	0	0	0	0	0	14979000	93624000	36201000	0	0	0	0	0	0	0	0	0	0	0	0	0	0	0	0	0	0	0	0	0	0	0	0
A0A078FK25	CYP97C1	Carotene epsilon-monooxygenase(EC 1.14.99.45)	tr|A0A078FK25|A0A078FK25_BRANA BnaC06g14430D protein OS=Brassica napus GN=BnaC06g14430D PE=3 SV=1;tr|A0A078BX71|A0A078BX71_BRANA BnaA07g15980D protein OS=Brassica napus GN=BnaA07g15980D PE=3 SV=1	59.788	533	1	0	0	0	0	3298800	0	2382400	1.89373e+06	0	0	0	0	6373800	0	2704000	3.02593e+06	0	4013100	2607500	2.20687e+06	0	2283900	6818500	3.03413e+06	0	8624200	13844000	7489400	2091900	0	0	697300
A0A078FLX9	CDC48D	Cell division control protein 48 homolog D (AtCDC48d)	tr|A0A078FLX9|A0A078FLX9_BRANA BnaC06g14490D protein OS=Brassica napus GN=BnaC06g14490D PE=4 SV=1;tr|A0A078BX76|A0A078BX76_BRANA BnaA07g16030D protein OS=Brassica napus GN=BnaA07g16030D PE=4 SV=1;tr|A0A078CQ09|A0A078CQ09_BRANA BnaA09g33490D protein OS=Bras	89.856	810	1	32885000	0	37805000	2.35633e+07	26507000	0	0	8.83567e+06	31213000	12921000	6488000	16874000	35329000	23177000	4443200	2.09831e+07	3042700	0	29198000	10746900	26570000	29988000	22938000	2.64987e+07	304100000	0	0	1.01367e+08	0	17266000	0	5.75533e+06
A0A078IKM5	PUMP1	Mitochondrial uncoupling protein 1 (AtPUMP1)	tr|A0A078IKM5|A0A078IKM5_BRANA BnaC06g42530D protein OS=Brassica napus GN=BnaC06g42530D PE=3 SV=1;tr|A0A078BXA1|A0A078BXA1_BRANA BnaA07g16280D protein OS=Brassica napus GN=BnaA07g16280D PE=3 SV=1;tr|A0A078CEZ3|A0A078CEZ3_BRANA BnaA09g34030D protein OS=Bras	32.653	304	1	0	604000	771000	458867	0	540840	476490	339110	0	0	0	0	0	635840	0	211947	0	0	0	0	0	0	0	0	0	0	1279200	426400	4713100	0	0	1.57103e+06
A0A078BXA8	RK17	50S ribosomal protein L17	tr|A0A078BXA8|A0A078BXA8_BRANA BnaA07g16330D protein OS=Brassica napus GN=BnaA07g16330D PE=3 SV=1;tr|A0A078CSU3|A0A078CSU3_BRANA BnaA09g34130D protein OS=Brassica napus GN=BnaA09g34130D PE=3 SV=1;tr|A0A078C9G1|A0A078C9G1_BRANA BnaC08g25060D protein OS=Bras	23.099	207	1	2671300	2876600	3200000	2.91597e+06	0	5443500	4924400	3.45597e+06	4810000	3305100	0	2.70503e+06	0	0	0	0	0	0	0	0	5986600	6786900	14212000	8.99517e+06	0	16314000	28094000	1.48027e+07	3853400	0	3637800	2.49707e+06
A0A078CNC7	Q01667	Chlorophyll a-b binding protein	tr|A0A078CNC7|A0A078CNC7_BRANA Chlorophyll a-b binding protein, chloroplastic OS=Brassica napus GN=BnaA09g34720D PE=3 SV=1;tr|A0A078C9E5|A0A078C9E5_BRANA Chlorophyll a-b binding protein, chloroplastic OS=Brassica napus GN=BnaC08g25680D PE=3 SV=1;tr|A0A078B	26.072	241	5	156990000	319800000	397540000	2.91443e+08	215330000	516630000	365380000	365780000	66949000	81582000	136350000	9.49603e+07	304620000	844050000	408200000	5.18957e+08	1279800000	847660000	713600000	947020000	1666500000	1726500000	143630000	1.17888e+09	9123600000	831460000	479230000	3.4781e+09	355940000	479000000	485100000	4.40013e+08
A0A078JE23	CLPC2	Chaperone protein ClpC2(EC 3.6.1.3)	tr|A0A078JE23|A0A078JE23_BRANA BnaA06g38690D protein OS=Brassica napus GN=BnaA06g38690D PE=3 SV=1;tr|A0A078D1U0|A0A078D1U0_BRANA BnaA01g20520D protein OS=Brassica napus GN=BnaA01g20520D PE=3 SV=1;tr|A0A078BXG1|A0A078BXG1_BRANA BnaC01g25820D protein OS=Bras	91.593	822	3	114600000	43066000	53379000	7.03483e+07	4235800	166530000	36172000	6.89793e+07	29457000	34855000	38210000	34174000	40266000	44630000	133040000	7.26453e+07	69091000	52215000	53833000	5.83797e+07	120050000	130400000	297690000	1.82713e+08	1524000	267510000	280890000	183308000	80617000	237180000	159490000	1.59096e+08
Q9FUM4	KIN1	Stress-induced protein KIN1	tr|Q9FUM4|Q9FUM4_BRANA BN28b OS=Brassica napus GN=BN28b PE=4 SV=1;tr|A0A078GMM9|A0A078GMM9_BRANA BnaC09g41890D protein OS=Brassica napus GN=BnaC09g41890D PE=4 SV=1;tr|A0A078BXG7|A0A078BXG7_BRANA BnaA10g18350D protein OS=Brassica napus GN=BnaA10g18350D PE=4	6.5962	65	1	691000	544000	879000	705313	395950	608990	514630	506523	3087800	346280	4670400	2.70149e+06	1441500	1281700	1269700	1.33097e+06	1407500	1375200	0	927567	1281300	724130	1018900	1008110	283570	2740000	922930	1315500	6668800	5948200	5264500	5960500
A0A078IVN3	SSL9	Protein STRICTOSIDINE SYNTHASE-LIKE 9 (AtSSL9)	tr|A0A078IVN3|A0A078IVN3_BRANA BnaCnng26110D protein OS=Brassica napus GN=BnaCnng26110D PE=4 SV=1;tr|A0A078BXI1|A0A078BXI1_BRANA BnaA07g17130D protein OS=Brassica napus GN=BnaA07g17130D PE=4 SV=1;tr|A0A078EZY2|A0A078EZY2_BRANA BnaA09g36360D protein OS=Bras	41.387	370	3	865000	914000	0	593177	0	108580	223680	110753	674100	1015700	0	563267	0	0	0	0	7590800	1317100	451520	3.11981e+06	0	0	0	0	0	354640	765700	373447	7090300	6233600	10359000	7894300
A0A078GM99	RGP2	UDP-arabinopyranose mutase 2 (EC 5.4.99.30)	tr|A0A078GM99|A0A078GM99_BRANA BnaC09g42220D protein OS=Brassica napus GN=BnaC09g42220D PE=4 SV=1;tr|A0A078BXI9|A0A078BXI9_BRANA BnaA10g18590D protein OS=Brassica napus GN=BnaA10g18590D PE=4 SV=1;tr|A0A078CN84|A0A078CN84_BRANA BnaA03g05580D protein OS=Bras	37.988	335	3	17742000	12154000	18118000	1.60047e+07	52239000	20554000	29809000	3.42007e+07	9644200	24312000	12292000	1.54161e+07	53777000	23053000	64897000	4.72423e+07	14573000	44794000	56662000	3.86763e+07	14840000	7770700	26735000	1.64486e+07	0	25665000	27772000	1.78123e+07	72157000	38860000	59242000	56753000
A0A078BXJ1	BG3	Probable glucan endo-1,3-beta-glucosidase BG3 (EC 3.2.1.39)	tr|A0A078BXJ1|A0A078BXJ1_BRANA BnaA07g17230D protein OS=Brassica napus GN=BnaA07g17230D PE=3 SV=1	37.894	341	7	99664000	84926000	82466000	8.90187e+07	17880000	19804000	20694000	1.94593e+07	175580000	255770000	323150000	251500000	274640000	170200000	75671000	1.73504e+08	83427000	68054000	93516000	8.16657e+07	8729000	7577600	9880200	8.72893e+06	0	6861100	5666400	4.17583e+06	44707000	91942000	115920000	8.41897e+07
A0A078CHA1	ISPH	4-hydroxy-3-methylbut-2-enyl diphosphate reductase	tr|A0A078CHA1|A0A078CHA1_BRANA BnaA08g11250D protein OS=Brassica napus GN=BnaA08g11250D PE=3 SV=1;tr|A0A078BXJ4|A0A078BXJ4_BRANA BnaC01g04060D protein OS=Brassica napus GN=BnaC01g04060D PE=3 SV=1;tr|A0A078IAM3|A0A078IAM3_BRANA BnaC03g66190D protein OS=Bras	52.151	461	2	13193000	13462000	18167000	1.49407e+07	246860	1868800	8852800	3.65615e+06	5763100	917010	3619500	3.4332e+06	4500100	4048200	4085100	4.21113e+06	1063800	1318500	4389400	2.25723e+06	8715000	2200600	3933600	4.94973e+06	0	6653000	17744000	8.13233e+06	8963000	8447000	1722100	6.37737e+06
A0A078BXJ8	PURA	Adenylosuccinate synthetase	tr|A0A078BXJ8|A0A078BXJ8_BRANA Adenylosuccinate synthetase, chloroplastic OS=Brassica napus GN=BnaA07g17380D PE=3 SV=1;tr|A0A078HAE4|A0A078HAE4_BRANA Adenylosuccinate synthetase, chloroplastic OS=Brassica napus GN=BnaCnng07310D PE=3 SV=1;tr|A0A078EYR1|A0A0	53.351	488	3	0	18333000	27912000	15415000	49464000	21368000	63149000	4.46603e+07	0	72676000	57896000	43524000	0	0	0	0	29493000	53414000	15921000	3.29427e+07	0	0	0	0	0	104400000	0	34800000	27115000	0	11878000	1.29977e+07
A0A078C6U0	DRP3A	Dynamin-related protein 3A	tr|A0A078C6U0|A0A078C6U0_BRANA BnaC07g45370D protein OS=Brassica napus GN=BnaC07g45370D PE=3 SV=1;tr|A0A078IUF9|A0A078IUF9_BRANA BnaAnng11630D protein OS=Brassica napus GN=BnaAnng11630D PE=3 SV=1;tr|A0A078FX10|A0A078FX10_BRANA BnaC03g65520D protein OS=Bras	26.991	254	1	0	0	0	0	0	31004	0	10334.7	0	0	0	0	0	94500	0	31500	0	0	0	0	0	0	0	0	171000	36690000	849230	1.25701e+07	134000	126500	89300	116600
A0A078DPD1	RR13	30S ribosomal protein S13	tr|A0A078DPD1|A0A078DPD1_BRANA BnaC02g05260D protein OS=Brassica napus GN=BnaC02g05260D PE=3 SV=1;tr|A0A078IZL2|A0A078IZL2_BRANA BnaC09g54460D protein OS=Brassica napus GN=BnaC09g54460D PE=3 SV=1;tr|A0A078CP15|A0A078CP15_BRANA BnaA03g04820D protein OS=Bras	18.272	161	2	32961000	7076000	8621600	1.62195e+07	32938000	33085000	0	2.20077e+07	8723900	13934000	0	7.55263e+06	0	0	0	0	9422300	0	0	3.14077e+06	51910000	268790000	2767200	107822400	0	207940000	0	6.93133e+07	8585000	0	10313000	6.29933e+06
Q7Y0H9	RPS6A	40S ribosomal protein S6-1	tr|Q7Y0H9|Q7Y0H9_BRANA 40S ribosomal protein S6 OS=Brassica napus GN=RPS6 PE=2 SV=1;tr|A0A078E4L9|A0A078E4L9_BRANA 40S ribosomal protein S6 OS=Brassica napus GN=BnaC09g46300D PE=3 SV=1;tr|A0A078D932|A0A078D932_BRANA 40S ribosomal protein S6 OS=Brassica nap	28.265	249	2	1934000	2351200	4411100	2.89877e+06	0	7364000	5066200	4143400	2226000	4843400	3985400	3.68493e+06	514660	288370	0	267677	0	1332500	1519100	950533	4402000	1824200	2747400	2991200	0	2678400	1835500	1.50463e+06	0	0	0	0
A0A078F9X4	RPL10	50S ribosomal protein L10(CL10)	tr|A0A078F9X4|A0A078F9X4_BRANA BnaC09g43570D protein OS=Brassica napus GN=BnaC09g43570D PE=3 SV=1;tr|A0A078BY26|A0A078BY26_BRANA BnaA10g19850D protein OS=Brassica napus GN=BnaA10g19850D PE=3 SV=1;tr|A0A078DP97|A0A078DP97_BRANA BnaC02g04820D protein OS=Bras	24.453	218	3	25587000	34708000	31305000	3.05333e+07	734140	58241000	55634000	3.8203e+07	132110000	24414000	105230000	8.72513e+07	2490700	14215000	0	5.56857e+06	11428000	20709000	13547000	15228000	44493000	16962000	16196000	2.58837e+07	23828000	17909000	15745000	1.91607e+07	56281000	63759000	80731000	6.69237e+07
A0A078C2Q1	ATPO	ATP synthase subunit O	tr|A0A078C2Q1|A0A078C2Q1_BRANA BnaC03g05880D protein OS=Brassica napus GN=BnaC03g05880D PE=3 SV=1;tr|A0A078F9W7|A0A078F9W7_BRANA BnaC09g43620D protein OS=Brassica napus GN=BnaC09g43620D PE=3 SV=1;tr|A0A078BY31|A0A078BY31_BRANA BnaA10g19900D protein OS=Bras	26.551	240	3	8982800	0	3143300	4.04203e+06	3516500	2618400	2718300	2.95107e+06	0	46935000	0	15645000	6787300	8223400	0	5.00357e+06	0	0	0	0	3056100	8640800	7688200	6461700	0	716620000	2432400	2.39684e+08	4310400	5984200	4465000	4.91987e+06
A0A078CHX9	At4g37550	Acetamidase/Formamidase family protein	tr|A0A078CHX9|A0A078CHX9_BRANA BnaA01g00380D protein OS=Brassica napus GN=BnaA01g00380D PE=4 SV=1;tr|A0A078BYB3|A0A078BYB3_BRANA BnaC01g01360D protein OS=Brassica napus GN=BnaC01g01360D PE=4 SV=1	49.822	452	1	0	0	0	0	0	0	0	0	110010000	0	11476000	4.04953e+07	0	0	0	0	0	0	0	0	0	0	10842000	3614000	615840	0	18557000	6.39095e+06	43619000	0	172250000	7.19563e+07
A0A078CZ38	At5g64990	RAB GTPase homolog H1A	tr|A0A078CZ38|A0A078CZ38_BRANA BnaC09g06750D protein OS=Brassica napus GN=BnaC09g06750D PE=4 SV=1;tr|A0A078E7E4|A0A078E7E4_BRANA BnaC09g46380D protein OS=Brassica napus GN=BnaC09g46380D PE=4 SV=1;tr|A0A078BYL4|A0A078BYL4_BRANA BnaA10g21990D protein OS=Bras	22.948	204	1	385000	0	0	128637	0	0	0	0	2940500	0	1475900	1.47213e+06	0	0	0	0	0	0	0	0	0	0	0	0	0	0	0	0	0	5756300	0	1.91877e+06
A0A078GUB9	CCT6A	T-complex protein 1 subunit zeta 1	tr|A0A078GUB9|A0A078GUB9_BRANA BnaA05g33440D protein OS=Brassica napus GN=BnaCnng05830D PE=3 SV=1;tr|A0A078CP91|A0A078CP91_BRANA BnaA03g05820D protein OS=Brassica napus GN=BnaA03g05820D PE=3 SV=1;tr|A0A078GJ20|A0A078GJ20_BRANA BnaC09g41780D protein OS=Bras	58.881	535	2	0	0	4177800	1392600	0	2386300	3382000	1.92277e+06	0	0	3094900	1.03163e+06	4058500	2427700	2461000	2982400	1660000	0	0	553333	2296100	2519400	3005300	2.60693e+06	903250	4161200	1796400	2286950	3326000	3795600	3090400	3404000
A0A078HX39	ASE3	Amidophosphoribosyltransferase 3(AtATase3)(EC 2.4.2.14)	tr|A0A078HX39|A0A078HX39_BRANA Amidophosphoribosyltransferase OS=Brassica napus GN=BnaA01g05210D PE=3 SV=1;tr|A0A078HY22|A0A078HY22_BRANA Amidophosphoribosyltransferase OS=Brassica napus GN=BnaC01g00030D PE=3 SV=1;tr|A0A078I5U0|A0A078I5U0_BRANA Amidophosph	52.894	481	1	2135900	145000	0	760627	0	0	279230	93076.7	523810	0	0	174603	0	199660	540550	246737	0	0	0	0	0	106680	0	35560	0	512690	3065400	1.1927e+06	4878500	4114000	0	2997500
A0A078CK61	CYP18-4	Peptidyl-prolyl cis-trans isomerase CYP18-4	tr|A0A078CK61|A0A078CK61_BRANA Peptidyl-prolyl cis-trans isomerase OS=Brassica napus GN=BnaA01g02340D PE=3 SV=1;tr|A0A078BYT0|A0A078BYT0_BRANA Peptidyl-prolyl cis-trans isomerase OS=Brassica napus GN=BnaC01g03590D PE=3 SV=1	18.204	172	1	0	218740000	234600000	1.51113e+08	196360000	189910000	0	1.28757e+08	284120000	0	0	9.47067e+07	0	0	0	0	0	42292000	102210000	4.81673e+07	0	0	0	0	15443000	0	0	5.14767e+06	0	0	0	0
A0A078GA43	NDC1	Alternative NAD(P)H-ubiquinone oxidoreductase C1 (EC 1.6.5.9)	tr|A0A078GA43|A0A078GA43_BRANA BnaC09g47290D protein OS=Brassica napus GN=BnaC09g47290D PE=4 SV=1;tr|A0A078BYU1|A0A078BYU1_BRANA BnaA10g22740D protein OS=Brassica napus GN=BnaA10g22740D PE=4 SV=1	57.008	525	5	5466600	0	4197700	3.22143e+06	2121600	0	2499900	1540500	0	0	0	0	51035000	21389000	4903300	2.57758e+07	5402900	18704000	0	8.03563e+06	0	4224300	13822000	6.01543e+06	678660000	17195000	52951000	249602000	17721000	19153000	44106000	2.69933e+07
A0A078BYU6	IDH1	Isocitrate dehydrogenase [NAD] regulatory subunit 1	tr|A0A078BYU6|A0A078BYU6_BRANA BnaC01g03290D protein OS=Brassica napus GN=BnaC01g03290D PE=4 SV=1;tr|A0A078GJN5|A0A078GJN5_BRANA BnaA08g14920D protein OS=Brassica napus GN=BnaA08g14920D PE=4 SV=1	45.605	418	1	0	0	0	0	0	0	0	0	0	0	0	0	2857000	0	0	952333	0	0	0	0	0	0	0	0	0	0	0	0	0	0	1858300	619433
B2Z3W8	ARF2-A	ADP-ribosylation factor 2-A (AtARF2)	tr|B2Z3W8|B2Z3W8_BRANA BnaA08g20460D protein OS=Brassica napus GN=BnaC08g06360D PE=2 SV=1;tr|A0A078IPS8|A0A078IPS8_BRANA BnaA09g14150D protein OS=Brassica napus GN=BnaA09g14150D PE=3 SV=1;tr|A0A078IBK6|A0A078IBK6_BRANA BnaC09g14700D protein OS=Brassica nap	20.578	181	1	0	0	0	0	4841500	8907300	9131500	7.62677e+06	0	0	0	0	4907600	7752300	0	4.21997e+06	0	0	11062000	3.68733e+06	11041000	6752300	0	5931100	0	0	0	0	9370900	6735200	10609000	8.90503e+06
A0A078BYY1	ACO1	Aconitate hydratase 1	tr|A0A078BYY1|A0A078BYY1_BRANA Aconitate hydratase OS=Brassica napus GN=BnaC01g02790D PE=3 SV=1;tr|A0A078CFK4|A0A078CFK4_BRANA Aconitate hydratase OS=Brassica napus GN=BnaA01g01700D PE=3 SV=1;tr|A0A078HV91|A0A078HV91_BRANA Aconitate hydratase OS=Brassica n	98.338	901	2	0	14970000	0	4990000	0	0	0	0	0	0	44532000	14844000	0	0	0	0	0	173720000	0	5.79067e+07	5810000	14714000	0	6.84133e+06	31377000	0	0	10459000	57702000	350560000	474580000	2.94281e+08
A0A078BZ09	SCPL35	Serine carboxypeptidase-like 35	tr|A0A078BZ09|A0A078BZ09_BRANA Carboxypeptidase OS=Brassica napus GN=BnaA10g23100D PE=3 SV=1;tr|A0A078G963|A0A078G963_BRANA Carboxypeptidase OS=Brassica napus GN=BnaC09g47650D PE=3 SV=1	53.94	483	3	35372000	32781000	20833000	29662000	26031000	0	29028000	18353000	105550000	44113000	73730000	7.44643e+07	30226000	33895000	218340000	9.41537e+07	21616000	291990000	21027000	1.11544e+08	53258000	7529800	12270000	24352600	0	21494000	0	7.16467e+06	58945000	21688000	26359000	35664000
A0A078D9F0	RR9	30S ribosomal protein S9	tr|A0A078D9F0|A0A078D9F0_BRANA BnaC06g22640D protein OS=Brassica napus GN=BnaC06g22640D PE=3 SV=1;tr|A0A078CAC2|A0A078CAC2_BRANA BnaC06g35770D protein OS=Brassica napus GN=BnaC06g35770D PE=3 SV=1;tr|A0A078JCZ3|A0A078JCZ3_BRANA BnaAnng19390D protein OS=Bras	22.763	211	2	20464000	24263000	26869000	2.38653e+07	271490	20177000	29890000	1.67795e+07	47997000	43660000	14154000	3.52703e+07	21586000	7468800	12163000	1.37393e+07	8006500	19678000	1874400	9.85297e+06	19861000	12581000	19179000	17207000	21765000	18935000	34401000	2.50337e+07	13597000	15038000	14665000	1.44333e+07
A0A078I713	MOJ9.19	Protein MAINTENANCE OF PSII UNDER HIGH LIGHT 1	tr|A0A078I713|A0A078I713_BRANA BnaA03g48230D protein OS=Brassica napus GN=BnaA03g48230D PE=4 SV=1;tr|A0A078EZF9|A0A078EZF9_BRANA BnaAnng01950D protein OS=Brassica napus GN=BnaAnng01950D PE=4 SV=1;tr|A0A078ED21|A0A078ED21_BRANA BnaC09g48190D protein OS=Bras	9.9654	97	1	0	0	0	0	0	0	0	0	0	0	0	0	0	0	0	0	0	0	0	0	0	0	0	0	0	11297000	0	3.76567e+06	0	0	0	0
A0A078EAC4	At5g07030	Eukaryotic aspartyl protease family protein	tr|A0A078EAC4|A0A078EAC4_BRANA BnaC09g48200D protein OS=Brassica napus GN=BnaC09g48200D PE=3 SV=1;tr|A0A078BZ58|A0A078BZ58_BRANA BnaA10g23500D protein OS=Brassica napus GN=BnaA10g23500D PE=3 SV=1	46.934	439	4	60018000	824310000	389630000	4.24653e+08	251860000	286450000	373220000	3.03843e+08	59373000	99705000	41530000	6.68693e+07	25743000	26843000	57441000	3.66757e+07	77319000	68034000	6786000	50713000	4814100	11746000	6551200	7.70377e+06	0	91221000	39209000	4.34767e+07	5872600	10943000	18855000	11890200
A0A078EDU3	At5g61410		tr|A0A078EDU3|A0A078EDU3_BRANA Ribulose-phosphate 3-epimerase OS=Brassica napus GN=BnaC09g48610D PE=3 SV=1;tr|A0A078BZA0|A0A078BZA0_BRANA Ribulose-phosphate 3-epimerase OS=Brassica napus GN=BnaA10g23990D PE=3 SV=1	29.37	275	2	36583000	131580000	383310000	1.83824e+08	0	71377000	199990000	9.04557e+07	0	138760000	133800000	9.08533e+07	647550000	336150000	282420000	422040000	0	210160000	121370000	110510000	210000000	156580000	0	1.22193e+08	77037000	114420000	0	63819000	0	0	6808200	2269400
A0A078IL52	RPSaA	40S ribosomal protein Sa-1 (Laminin receptor homolog) (p40)	tr|A0A078IL52|A0A078IL52_BRANA 40S ribosomal protein SA OS=Brassica napus GN=BnaC06g24350D PE=3 SV=1;tr|A0A078BZC2|A0A078BZC2_BRANA 40S ribosomal protein SA OS=Brassica napus GN=BnaA07g23080D PE=3 SV=1;sp|Q9ZSR8|RSSA_BRANA 40S ribosomal protein SA OS=Brass	31.612	288	8	182750000	158820000	206220000	1.82597e+08	44821000	233590000	276410000	1.8494e+08	588110000	836350000	458200000	6.27553e+08	251380000	107600000	112550000	1.57177e+08	253060000	260450000	193770000	235760000	131220000	136340000	118590000	1.28717e+08	1490200000	247760000	162680000	6.33547e+08	230420000	176570000	291910000	2.32967e+08
A0A078BZD2	PATL3	Patellin-3	tr|A0A078BZD2|A0A078BZD2_BRANA BnaA07g23180D protein OS=Brassica napus GN=BnaA07g23180D PE=4 SV=1;tr|A0A078IKB6|A0A078IKB6_BRANA BnaC06g24230D protein OS=Brassica napus GN=BnaC06g24230D PE=4 SV=1;tr|A0A078ESM1|A0A078ESM1_BRANA BnaA02g15830D protein OS=Bras	49.645	439	1	565000	680000	703000	649693	0	436890	485900	307597	0	2635500	3024300	1886600	4653800	2756600	2690100	3.36683e+06	742290	1159600	607760	836550	1048000	1938500	0	995500	0	430290	1573700	667997	3867100	3437800	3443400	3.58277e+06
A0A078II75	COX6A	Cytochrome c oxidase subunit 6a(AtCOX6a)	tr|A0A078II75|A0A078II75_BRANA BnaC03g61230D protein OS=Brassica napus GN=BnaC03g61230D PE=4 SV=1;tr|A0A078IST7|A0A078IST7_BRANA BnaA04g28190D protein OS=Brassica napus GN=BnaA04g28190D PE=4 SV=1;tr|A0A078DT63|A0A078DT63_BRANA BnaA08g15810D protein OS=Bras	10.333	92	1	74310000	0	0	24770000	72446000	0	52757000	4.17343e+07	0	0	0	0	22808000	0	0	7.60267e+06	21961000	0	0	7.32033e+06	0	0	0	0	0	11953000	28485000	1.34793e+07	194200000	112060000	0	1.02087e+08
A0A078CCF0	PCKA	Phosphoenolpyruvate carboxykinase (ATP) PEP carboxykinase PEPCK	tr|A0A078CCF0|A0A078CCF0_BRANA BnaC07g46800D protein OS=Brassica napus GN=BnaC07g46800D PE=3 SV=1;tr|A0A078BZE7|A0A078BZE7_BRANA BnaC01g01140D protein OS=Brassica napus GN=BnaC01g01140D PE=3 SV=1;tr|A0A078CEU1|A0A078CEU1_BRANA BnaA01g00210D protein OS=Bras	70.127	638	2	0	14391000	0	4797000	9935000	0	10410000	6.78167e+06	7986400	11118000	0	6.36813e+06	14398000	12722000	8010500	1.17102e+07	15775000	6810000	0	7.52833e+06	0	10178000	0	3.39267e+06	0	0	14277000	4759000	0	12352000	0	4.11733e+06
A0A078K1Z4	RH6	DEAD-box ATP-dependent RNA helicase 6 (EC 3.6.4.13)	tr|A0A078K1Z4|A0A078K1Z4_BRANA BnaAnng39360D protein (Fragment) OS=Brassica napus GN=BnaAnng39360D PE=4 SV=1;tr|A0A078IMF3|A0A078IMF3_BRANA BnaCnng20150D protein OS=Brassica napus GN=BnaCnng20150D PE=4 SV=1;tr|A0A078D930|A0A078D930_BRANA BnaA02g00880D prot	46.794	417	3	0	0	0	0	0	1602100	2258600	1286900	0	0	43804000	1.46013e+07	942190	418700	0	453630	0	7196400	1193600	2.79667e+06	837420	782720	8425700	3.34861e+06	0	182770000	3346900	6.2039e+07	41258000	22371000	27165000	3.02647e+07
A0A078BZH8	CBSX3	CBS domain-containing protein CBSX3	tr|A0A078BZH8|A0A078BZH8_BRANA BnaA10g21510D protein OS=Brassica napus GN=BnaA10g21510D PE=4 SV=1;tr|A0A078E8M4|A0A078E8M4_BRANA BnaC09g45610D protein OS=Brassica napus GN=BnaC09g45610D PE=4 SV=1	32.007	286	4	145580000	72806000	15836000	78074000	177840000	81625000	296990000	185485000	136980000	145880000	663840000	3.15567e+08	269610000	140160000	51741000	153837000	37405000	19897000	123770000	6.03573e+07	189960000	186310000	141040000	1.72437e+08	675520000	120760000	102070000	299450000	217630000	183950000	193240000	1.98273e+08
A0A078JFL2	CH1	Chlorophyllide a oxygenase	>tr|A0A078JFL2|A0A078JFL2_BRANA BnaAnng19090D protein OS=Brassica napus OX=3708 GN=BnaAnng19090D PE=4 SV=1	59773	531	5	91048000	82910000	69387000	8.11154e+07	17601000	22344000	27309000	22418000	4288300	6172630	5904100	5455044	8273000	10295000	11275000	9.94767e+06	15268000	16774000	18002000	1.66813e+07	8900300	6768600	7329400	7666100	258395000	220196000	219482000	232691000	14029000	11279000	12885000	12731000
A0A078FHJ5	PCB2	Divinyl chlorophyllide a 8-vinyl-reductase(EC 1.3.1.75)	>tr|A0A078FHJ5|A0A078FHJ5_BRANA BnaC09g39160D protein OS=Brassica napus OX=3708 GN=BnaC09g39160D PE=4 SV=1	45921	418	2	40029000	31285000	30291000	3.38691e+07	47066000	45035000	42120000	4.47403e+07	31283900	34883920	29104490	31757452	18204000	12995000	15849000	1.56827e+07	34920000	41827000	38472000	3.84063e+07	14227500	16284400	14938400	15150100	419483000	390285000	438728000	4.16165e+08	15192000	9877000	10919000	11996000
A0A078E4U1	AT5g10730	NAD(P)-binding Rossmann-fold superfamily protein	tr|A0A078E4U1|A0A078E4U1_BRANA BnaC09g45750D protein OS=Brassica napus GN=BnaC09g45750D PE=4 SV=1;tr|A0A078BZI2|A0A078BZI2_BRANA BnaA10g21560D protein OS=Brassica napus GN=BnaA10g21560D PE=4 SV=1;tr|A0A078HTN9|A0A078HTN9_BRANA BnaC02g00170D protein OS=Bras	31.115	288	1	0	0	0	0	0	0	0	0	0	0	0	0	0	0	0	0	36423000	0	19659000	18694000	0	0	0	0	0	0	0	0	38895000	0	0	12965000
A0A078EVA4	BTR1	Protein BTR1	tr|A0A078EVA4|A0A078EVA4_BRANA BnaAnng00940D protein OS=Brassica napus GN=BnaAnng00940D PE=4 SV=1;tr|A0A078FM46|A0A078FM46_BRANA BnaC02g02730D protein OS=Brassica napus GN=BnaC02g02730D PE=4 SV=1;tr|A0A078FD91|A0A078FD91_BRANA BnaA03g01270D protein OS=Bras	22.332	205	1	2044800	1367700	0	1137500	0	1860100	3747900	1.86933e+06	1607700	2024000	2026200	1.88597e+06	884830	819980	0	568270	0	1268700	1015100	761267	0	0	0	0	0	2825000	2836900	1887300	3558200	0	3065100	2.20777e+06
A0A078C007	ADK2	Adenosine kinase 2	tr|A0A078C007|A0A078C007_BRANA BnaA10g26640D protein OS=Brassica napus GN=BnaA10g26640D PE=4 SV=1;tr|A0A078FBL4|A0A078FBL4_BRANA BnaCnng02900D protein OS=Brassica napus GN=BnaCnng02900D PE=4 SV=1;tr|A0A078FE18|A0A078FE18_BRANA BnaA03g00830D protein OS=Bras	37.623	344	3	30264000	45230000	48596000	4.13633e+07	66073000	39362000	16657000	4.06973e+07	60845000	0	62426000	4.10903e+07	0	0	0	0	31371000	0	35984000	2.24517e+07	28433000	24991000	30854000	2.80927e+07	50539000	75013000	10323000	4.52917e+07	103490000	90785000	90416000	94897000
A0A078FBH4	SBE2.2	1,4-alpha-glucan-branching enzyme 2-2 (AtSBE II-2) (EC 2.4.1.18)	tr|A0A078FBH4|A0A078FBH4_BRANA BnaCnng02680D protein OS=Brassica napus GN=BnaCnng02680D PE=4 SV=1;tr|A0A078C011|A0A078C011_BRANA BnaA10g26450D protein OS=Brassica napus GN=BnaA10g26450D PE=4 SV=1;tr|A0A078D4U0|A0A078D4U0_BRANA BnaC04g08890D protein OS=Bras	95.254	837	1	0	84787000	0	2.82623e+07	0	0	22690000	7.56333e+06	0	0	18106000	6.03533e+06	3637600	43225000	0	1.56209e+07	0	0	22756000	7.58533e+06	0	0	23539000	7.84633e+06	136540000	34946000	0	57162000	0	0	0	0
Q84JA9	IDH5	Isocitrate dehydrogenase [NAD] catalytic subunit 5(EC 1.1.1.41)	tr|Q84JA9|Q84JA9_BRANA Isocitrate dehydrogenase [NAD] subunit, mitochondrial (Fragment) OS=Brassica napus PE=2 SV=1;tr|A0A078FAF4|A0A078FAF4_BRANA Isocitrate dehydrogenase [NAD] subunit, mitochondrial OS=Brassica napus GN=BnaCnng02920D PE=3 SV=1;tr|A0A078I	36.245	330	4	78986000	25076000	95178000	6.64133e+07	0	44233000	51407000	31880000	15363000	15249000	6630700	1.24142e+07	29497000	58459000	49938000	4.59647e+07	108110000	52930000	177960000	113000000	64882000	79103000	91436000	7.84737e+07	0	39765000	35825000	2.51967e+07	121240000	222350000	155680000	1.66423e+08
A0A078GP33	CLPB3	Chaperone protein ClpB3(ATP-dependent Clp protease ATP-binding subunit ClpB homolog 3)	tr|A0A078GP33|A0A078GP33_BRANA BnaC09g42450D protein OS=Brassica napus GN=BnaC09g42450D PE=3 SV=1;tr|A0A078C054|A0A078C054_BRANA BnaA10g18730D protein OS=Brassica napus GN=BnaA10g18730D PE=3 SV=1;tr|A0A078DP19|A0A078DP19_BRANA BnaC02g06060D protein OS=Bras	109.15	973	11	2489600000	1239200000	1507700000	1745500000	78916000	43066000	157000000	92994000	4480400	202510000	28644000	78544800	35925000	43235000	22081000	33747000	30455000	102020000	183060000	1.05178e+08	76882000	199160000	39509000	1.05184e+08	0	171790000	300930000	1.57573e+08	131320000	14440000	294370000	146710000
A0A078D139	PER	Peroxidase	tr|A0A078D139|A0A078D139_BRANA Peroxidase OS=Brassica napus GN=BnaA01g20660D PE=3 SV=1;tr|A0A078C056|A0A078C056_BRANA Peroxidase OS=Brassica napus GN=BnaC01g25860D PE=3 SV=1	38.411	349	2	1844000	2839900	17798000	7.49397e+06	0	375300	0	125100	46025000	37070000	72397000	5.18307e+07	0	0	0	0	3843900	3132100	3370300	3.44877e+06	0	0	0	0	31617000	0	3451200	11689400	0	1082400	0	360800
A0A078DV61	PER22	Rubisco methyltransferase family protein	tr|A0A078DV61|A0A078DV61_BRANA BnaC02g05240D protein OS=Brassica napus GN=BnaC02g05240D PE=4 SV=1;tr|A0A078J2Z1|A0A078J2Z1_BRANA BnaC09g54420D protein OS=Brassica napus GN=BnaC09g54420D PE=4 SV=1;tr|A0A078C0C7|A0A078C0C7_BRANA BnaA10g19430D protein OS=Bras	48.274	429	1	17479000	12361000	18865000	16235000	0	0	0	0	1280100	0	0	426700	0	0	0	0	0	0	0	0	73900000	85446000	93061000	8.41357e+07	0	45177000	38533000	2.79033e+07	63521000	18577000	0	27366000
A0A078I603	T1E3_70	Aspartyl aminopeptidase (Aspartyl aminopeptidase-like protein)	tr|A0A078I603|A0A078I603_BRANA BnaC09g50740D protein OS=Brassica napus GN=BnaC09g50740D PE=3 SV=1;tr|A0A078C0D2|A0A078C0D2_BRANA BnaA10g25560D protein OS=Brassica napus GN=BnaA10g25560D PE=3 SV=1	56.88	517	2	756680	1068500	1523300	1116160	934190	666810	0	533667	1812000	2700800	2123100	2.21197e+06	0	991550	1083100	691550	1454300	1808300	1158000	1.47353e+06	1210000	0	530570	580190	0	1061100	949420	670173	848320	939780	1076900	955000
A0A078CTH6	NILP3	Omega-amidase	tr|A0A078CTH6|A0A078CTH6_BRANA BnaA03g03750D protein OS=Brassica napus GN=BnaA03g03750D PE=4 SV=1;tr|A0A078C0I3|A0A078C0I3_BRANA BnaC03g05250D protein OS=Brassica napus GN=BnaC03g05250D PE=4 SV=1	39.668	364	4	0	23446000	0	7.81533e+06	6145300	14247000	8442500	9611600	16724000	15728000	18436000	1.69627e+07	12582000	43843000	23523000	2.66493e+07	0	47764000	10125000	1.92963e+07	3658200	31660000	6856100	14058100	0	28123000	6822200	11648400	5623800	7216700	38025000	1.69552e+07
A0A078C0M4	AMPL2	Leucine aminopeptidase 2	tr|A0A078C0M4|A0A078C0M4_BRANA BnaC01g07500D protein OS=Brassica napus GN=BnaC01g07500D PE=3 SV=1;tr|A0A078GSU8|A0A078GSU8_BRANA BnaA01g06220D protein OS=Brassica napus GN=BnaA01g06220D PE=3 SV=1	61.036	582	10	137330000	33169000	136920000	102473000	103570000	69627000	58455000	7.72173e+07	120520000	415380000	300480000	2.78793e+08	298780000	301460000	305850000	302030000	188590000	175560000	109670000	157940000	276960000	238640000	176770000	230790000	3643900000	124050000	208420000	1.32546e+09	146100000	160700000	144710000	1.50503e+08
A0A078CTN4	PNSL5	Photosynthetic NDH subunit of lumenal location 5	tr|A0A078CTN4|A0A078CTN4_BRANA Peptidyl-prolyl cis-trans isomerase OS=Brassica napus GN=BnaA03g04200D PE=3 SV=1;tr|A0A078C0N9|A0A078C0N9_BRANA Peptidyl-prolyl cis-trans isomerase OS=Brassica napus GN=BnaC03g05790D PE=3 SV=1	27.909	256	4	109950000	0	46478000	5.21427e+07	361380000	215470000	91184000	222678000	80956000	117820000	94808000	9.78613e+07	0	0	0	0	24140000	220320000	202990000	149150000	288810000	333770000	375800000	3.32793e+08	5084200000	231840000	53220000	1.78975e+09	272950000	385470000	588200000	415540000
I7D138	LYSA2	Diaminopimelate decarboxylase (DAPDC 2) (EC 4.1.1.20)	tr|I7D138|I7D138_BRANA Putative diaminopimelate decarboxylase OS=Brassica napus PE=3 SV=1;tr|A0A078C0R3|A0A078C0R3_BRANA BnaA10g20730D protein OS=Brassica napus GN=BnaA10g20730D PE=3 SV=1;tr|A0A078CNM1|A0A078CNM1_BRANA BnaA03g03620D protein OS=Brassica nap	53.465	485	3	31233000	41545000	52540000	4.17727e+07	5494900	94989000	27102000	4.25286e+07	71094000	75800000	59963000	6.89523e+07	22356000	16915000	11517000	1.69293e+07	48332000	111370000	59548000	7.30833e+07	83076000	20388000	22953000	42139000	0	0	10485000	3495000	11538000	12060000	52051000	2.52163e+07
A0A078CNZ6	At5g13980	Probable alpha-mannosidase	tr|A0A078CNZ6|A0A078CNZ6_BRANA Alpha-mannosidase OS=Brassica napus GN=BnaA03g04620D PE=3 SV=1;tr|A0A078C0V8|A0A078C0V8_BRANA Alpha-mannosidase OS=Brassica napus GN=BnaC03g06150D PE=3 SV=1	115.34	1020	4	7132500	6017300	6599300	6.58303e+06	15905000	16346000	17055000	1.64353e+07	46039000	60450000	51394000	5.26277e+07	24186000	15725000	10916000	1.69423e+07	48095000	18584000	35602000	3.40937e+07	7165300	6167600	10107000	7813300	0	0	9963600	3321200	7008800	8163200	11921000	9031000
A0A078CRC2	GASAE	Gibberellin-regulated protein 14	tr|A0A078CRC2|A0A078CRC2_BRANA BnaA03g05110D protein OS=Brassica napus GN=BnaA03g05110D PE=4 SV=1;tr|A0A078C0Y9|A0A078C0Y9_BRANA BnaC03g06640D protein OS=Brassica napus GN=BnaC03g06640D PE=4 SV=1	49.44	461	1	35054000	5455100	7445300	15984800	113870000	134310000	34496000	9.42253e+07	14011000	22756000	10897000	15888000	0	0	0	0	4519300	7111300	6212300	5.94763e+06	48020000	55982000	11023000	3.83417e+07	0	0	112040000	3.73467e+07	85277000	0	58657000	47978000
A0A078C139	IPYR6	Soluble inorganic pyrophosphatase 6	tr|A0A078C139|A0A078C139_BRANA BnaA10g22430D protein OS=Brassica napus GN=BnaA10g22430D PE=4 SV=1;tr|A0A078GA69|A0A078GA69_BRANA BnaC09g46990D protein OS=Brassica napus GN=BnaC09g46990D PE=4 SV=1	33.26	298	4	4009200	5489700	8312900	5.93727e+06	14600000	7761500	18691000	1.36842e+07	13271000	19127000	24663000	1.90203e+07	31398000	12182000	8328500	1.73028e+07	20581000	10908000	6177300	1.25554e+07	13662000	8883400	14173000	1.22395e+07	59128000	5511900	11099000	25246300	7617100	12378000	11535000	1.051e+07
A0A078C163	SHM3	Serine hydroxymethyltransferase 3	tr|A0A078C163|A0A078C163_BRANA Serine hydroxymethyltransferase OS=Brassica napus GN=BnaC01g06000D PE=3 SV=1;tr|A0A078HRG0|A0A078HRG0_BRANA Serine hydroxymethyltransferase OS=Brassica napus GN=BnaC03g67280D PE=3 SV=1;tr|A0A078GFC4|A0A078GFC4_BRANA Serine hy	57.773	529	3	32728000	0	0	1.09093e+07	68374000	37503000	21061000	4.23127e+07	6167500	25592000	12980000	1.49132e+07	30681000	8856000	0	13179000	0	23796000	35280000	19692000	23411000	0	13238000	1.22163e+07	0	0	0	0	15476000	16297000	0	10591000
A0A078I6L6	At5g08680	ATP synthase subunit beta-3(EC 3.6.3.14)	tr|A0A078I6L6|A0A078I6L6_BRANA ATP synthase subunit beta OS=Brassica napus GN=BnaC02g01040D PE=3 SV=1;tr|A0A078GA38|A0A078GA38_BRANA ATP synthase subunit beta OS=Brassica napus GN=BnaC09g47340D PE=3 SV=1;tr|A0A078CN85|A0A078CN85_BRANA ATP synthase subunit	59.501	553	20	2843000000	2276100000	2988100000	2702400000	289600000	1773100000	1993900000	1352200000	2947500000	3369100000	2231800000	2.84947e+09	2836900000	2563300000	2041000000	2480400000	3846700000	3741500000	3608400000	3732200000	3112100000	3384700000	3348200000	3.28167e+09	141830000	2223800000	1553900000	1306510000	4182100000	4580000000	4014500000	4.25887e+09
A0A078C3P2	ADT2	ADP,ATP carrier protein 2	tr|A0A078C3P2|A0A078C3P2_BRANA BnaA10g19870D protein OS=Brassica napus GN=BnaA10g19870D PE=3 SV=1;tr|A0A078CNX4|A0A078CNX4_BRANA BnaA03g04370D protein OS=Brassica napus GN=BnaA03g04370D PE=3 SV=1;tr|A0A078C170|A0A078C170_BRANA BnaC03g05910D protein OS=Bras	40.619	372	8	207630000	160770000	300320000	2.22907e+08	88847000	232860000	122310000	1.48006e+08	10286000	4858500	4872400	6672300	552970000	252410000	88428000	297936000	89259000	102100000	241300000	1.4422e+08	43922000	38653000	42699000	41758000	192430000	387110000	295730000	2.91757e+08	691070000	812220000	791740000	765010000
A0A078C192	CLPP2	ATP-dependent Clp protease proteolytic subunit	tr|A0A078C192|A0A078C192_BRANA ATP-dependent Clp protease proteolytic subunit OS=Brassica napus GN=BnaA10g23130D PE=3 SV=1;tr|A0A078EJG7|A0A078EJG7_BRANA ATP-dependent Clp protease proteolytic subunit OS=Brassica napus GN=BnaA03g39570D PE=3 SV=1;tr|A0A078J	16.262	150	1	0	0	0	0	0	0	0	0	0	0	0	0	0	0	0	0	0	0	0	0	0	0	0	0	0	0	0	0	0	0	0	0
A0A078C5R7	At4g32760	ENTH/VHS/GAT family protein	tr|A0A078C5R7|A0A078C5R7_BRANA BnaC07g43930D protein OS=Brassica napus GN=BnaC07g43930D PE=4 SV=1;tr|A0A078C1A2|A0A078C1A2_BRANA BnaC01g05650D protein OS=Brassica napus GN=BnaC01g05650D PE=4 SV=1;tr|A0A078FK15|A0A078FK15_BRANA BnaA03g52190D protein OS=Bras	70.023	645	1	0	0	0	0	0	0	856900	285633	0	0	0	0	977750	0	694370	557373	0	0	871670	290557	3652300	0	4019000	2557100	3575300	439900	1496800	1.83733e+06	1201500	1663900	1194800	1353400
A0A078FKR0	SQD1	SQD1 (Fragment)	tr|A0A078FKR0|A0A078FKR0_BRANA BnaA03g52320D protein OS=Brassica napus GN=BnaA03g52320D PE=4 SV=1;tr|A0A078C6A8|A0A078C6A8_BRANA BnaC07g44070D protein OS=Brassica napus GN=BnaC07g44070D PE=4 SV=1;tr|A0A078C1F9|A0A078C1F9_BRANA BnaC01g05200D protein OS=Bras	53.619	479	6	1983000000	618010000	1068500000	1223170000	210010000	448290000	501780000	3.86693e+08	80518000	37809000	22126000	4.68177e+07	461200000	142060000	37882000	213714000	10075000	0	61666000	2.39137e+07	442840000	233480000	638520000	438280000	0	770930000	603830000	4.58253e+08	16009000	18020000	46699000	2.69093e+07
A0A078CJS1	APM1	Aminopeptidase M1	tr|A0A078CJS1|A0A078CJS1_BRANA Aminopeptidase OS=Brassica napus GN=BnaA01g03790D PE=3 SV=1;tr|A0A078C1G4|A0A078C1G4_BRANA Aminopeptidase OS=Brassica napus GN=BnaC01g05150D PE=3 SV=1	97.614	873	2	2916100	0	58665000	2.0527e+07	0	25154000	13812000	1.29887e+07	0	72139000	0	2.40463e+07	45417000	36561000	25767000	35915000	0	0	0	0	34156000	40204000	0	2.47867e+07	0	10319000	0	3.43967e+06	27321000	22782000	8773600	1.96255e+07
A0A078DIY0	STR12	Rhodanese-like/PpiC domain-containing protein 12	tr|A0A078DIY0|A0A078DIY0_BRANA BnaA03g07570D protein OS=Brassica napus GN=BnaA03g07570D PE=4 SV=1;tr|A0A078C1V8|A0A078C1V8_BRANA BnaC03g09590D protein OS=Brassica napus GN=BnaC03g09590D PE=4 SV=1;tr|A0A078I6Z4|A0A078I6Z4_BRANA BnaA02g04180D protein OS=Bras	32.668	297	3	14133000	0	11312000	8.48167e+06	42078000	187520000	40152000	8.99167e+07	0	0	11066000	3.68867e+06	12904000	22974000	0	1.19593e+07	13604000	25296000	0	1.29667e+07	0	0	28256000	9.41867e+06	0	25877000	30902000	1.89263e+07	0	24678000	0	8226000
A0A078CK40	RS16A	30S ribosomal protein S16-1	tr|A0A078CK40|A0A078CK40_BRANA BnaA01g02540D protein OS=Brassica napus GN=BnaA01g02540D PE=3 SV=1;tr|A0A078C204|A0A078C204_BRANA BnaC01g03800D protein OS=Brassica napus GN=BnaC01g03800D PE=3 SV=1	12.762	113	2	11267000	60654000	0	2.39737e+07	36106000	51632000	52661000	4.67997e+07	0	0	0	0	0	0	0	0	0	19383000	0	6461000	28604000	42668000	41933000	37735000	0	0	0	0	0	29286000	0	9762000
A0A078C236	GL33	Germin-like protein subfamily 3 member 3	tr|A0A078C236|A0A078C236_BRANA BnaC03g10190D protein OS=Brassica napus GN=BnaC03g10190D PE=3 SV=1	21.915	211	2	190160000	205630000	171500000	1.89097e+08	89334000	106900000	48548000	81594000	117700000	242390000	125290000	1.61793e+08	15898000	8925000	44104000	2.29757e+07	62374000	61834000	221560000	115256000	117530000	89955000	121140000	1.09542e+08	0	0	0	0	31313000	0	0	1.04377e+07
A0A078CFD3	At2g17340	Uncharacterized protein At2g17340	tr|A0A078CFD3|A0A078CFD3_BRANA BnaA01g02050D protein OS=Brassica napus GN=BnaA01g02050D PE=4 SV=1;tr|A0A078C241|A0A078C241_BRANA BnaC01g03200D protein OS=Brassica napus GN=BnaC01g03200D PE=4 SV=1	41.071	367	3	4158600	2190600	0	2116400	0	0	1929300	643100	1860900	2669800	1938200	2156300	7376500	3822200	2867900	4.68887e+06	0	3648400	4358300	2668900	7898500	15793000	4659000	9.45017e+06	224150000	3527100	3703400	7.71268e+07	26241000	21350000	9851800	19147600
A0A078IPH5	CPN20	20 kDa chaperonin (Ch-CPN10)	tr|A0A078IPH5|A0A078IPH5_BRANA BnaA03g56040D protein OS=Brassica napus GN=BnaA03g56040D PE=3 SV=1;tr|A0A078C244|A0A078C244_BRANA BnaC03g10240D protein OS=Brassica napus GN=BnaC03g10240D PE=3 SV=1	26.783	253	3	518830000	150750000	122030000	263870000	146210000	333930000	158970000	2.13037e+08	76457000	76778000	81848000	78361000	53933000	84714000	246700000	128449000	107850000	156840000	232990000	1.65893e+08	0	233060000	338310000	1.90457e+08	1851500	535170000	574650000	3.70557e+08	144580000	266930000	149480000	1.86997e+08
A0A078C2C3	ASP3	Aspartate aminotransferase 3	tr|A0A078C2C3|A0A078C2C3_BRANA Aspartate aminotransferase OS=Brassica napus GN=BnaC03g04830D PE=4 SV=1;tr|A0A078CTE2|A0A078CTE2_BRANA Aspartate aminotransferase OS=Brassica napus GN=BnaA03g03400D PE=4 SV=1;tr|A0A078DQL1|A0A078DQL1_BRANA BnaC02g03850D prote	49.132	450	2	812000	566000	532000	637297	0	0	0	0	0	0	0	0	563210	484110	580740	542687	0	571070	0	190357	572000	374080	436440	460840	0	610070	781810	463960	2419800	2615500	1864300	2.29987e+06
A0A078CNU3	NADP-ME2	NADP-dependent malic enzyme 2	tr|A0A078CNU3|A0A078CNU3_BRANA Malic enzyme OS=Brassica napus GN=BnaA03g03440D PE=3 SV=1;tr|A0A078C2D5|A0A078C2D5_BRANA Malic enzyme OS=Brassica napus GN=BnaC03g04930D PE=3 SV=1	64.476	588	3	41824000	0	0	1.39413e+07	0	40643000	27186000	2.26097e+07	0	0	0	0	50809000	37386000	31953000	4.00493e+07	0	0	0	0	35527000	33985000	17447000	2.89863e+07	0	18479000	17244000	1.19077e+07	180970000	180660000	241640000	201090000
A0A078CHT9	RCCR	Red chlorophyll catabolite reductase	tr|A0A078CHT9|A0A078CHT9_BRANA BnaA01g00780D protein OS=Brassica napus GN=BnaA01g00780D PE=4 SV=1;tr|Q1ELT7|Q1ELT7_BRANA Red chlorophyll catabolite reductase (Fragment) OS=Brassica napus GN=rccr PE=2 SV=1;tr|A0A078C2H3|A0A078C2H3_BRANA BnaC01g01800D protei	32.124	281	2	9626300	0	0	3.20877e+06	17337000	16675000	0	1.13373e+07	39320000	0	0	1.31067e+07	0	0	0	0	0	0	0	0	11694000	0	27071000	1.29217e+07	0	16169000	14997000	1.03887e+07	33467000	35771000	0	2.30793e+07
A0A078E8Z5	RER4	Protein RETICULATA-RELATED 4	tr|A0A078E8Z5|A0A078E8Z5_BRANA BnaC09g44210D protein OS=Brassica napus GN=BnaC09g44210D PE=4 SV=1;tr|A0A078C2M3|A0A078C2M3_BRANA BnaC03g05630D protein OS=Brassica napus GN=BnaC03g05630D PE=4 SV=1;tr|A0A078CMU1|A0A078CMU1_BRANA BnaA03g04030D protein OS=Bras	40.18	374	1	0	0	0	0	0	0	0	0	0	0	0	0	0	0	0	0	0	0	6234300	2078100	0	0	0	0	0	13931000	11054000	8.32833e+06	46629000	0	0	15543000
A0A078CP97	CHLH	Magnesium-chelatase subunit ChlH	tr|A0A078CP97|A0A078CP97_BRANA BnaA03g04440D protein OS=Brassica napus GN=BnaA03g04440D PE=4 SV=1;tr|A0A078C2U8|A0A078C2U8_BRANA BnaC03g05980D protein OS=Brassica napus GN=BnaC03g05980D PE=4 SV=1	153.48	1382	2	0	0	0	0	7893700	0	0	2.63123e+06	0	0	0	0	0	0	0	0	0	0	0	0	0	0	0	0	0	0	0	0	0	5072100	0	1690700
A0A078DNA2	UXS3	UDP-glucuronic acid decarboxylase 3	tr|A0A078DNA2|A0A078DNA2_BRANA BnaA03g09560D protein OS=Brassica napus GN=BnaA03g09560D PE=4 SV=1;tr|A0A078C2V6|A0A078C2V6_BRANA BnaC03g12060D protein OS=Brassica napus GN=BnaC03g12060D PE=4 SV=1;tr|A0A078BUE3|A0A078BUE3_BRANA BnaC01g24540D protein OS=Bras	38.629	343	1	0	0	0	0	0	0	0	0	0	0	0	0	0	0	0	0	23330000	0	0	7.77667e+06	0	0	0	0	0	0	0	0	0	5200300	0	1.73343e+06
A0A078C2X9	AER	NADPH-dependent oxidoreductase 2-alkenal reductase	tr|A0A078C2X9|A0A078C2X9_BRANA BnaA10g17570D protein OS=Brassica napus GN=BnaA10g17570D PE=4 SV=1;tr|A0A078FVH8|A0A078FVH8_BRANA BnaC09g40930D protein OS=Brassica napus GN=BnaC09g40930D PE=4 SV=1;tr|A0A078CNE6|A0A078CNE6_BRANA BnaA03g06330D protein OS=Bras	37.975	344	3	0	0	1747700	582567	3317600	10942000	0	4753200	6229700	2576700	7947200	5.58453e+06	3059100	7436100	24867000	11787400	23107000	0	20979000	1.46953e+07	13395000	15338000	35092000	21275000	0	20346000	0	6782000	13451000	24503000	29084000	22346000
A0A078C354	RPS7C	40S ribosomal protein S7-3	tr|A0A078C354|A0A078C354_BRANA BnaA10g18170D protein OS=Brassica napus GN=BnaA10g18170D PE=4 SV=1;tr|A0A078HJU4|A0A078HJU4_BRANA BnaC02g06410D protein OS=Brassica napus GN=BnaC02g06410D PE=4 SV=1;tr|A0A078DB60|A0A078DB60_BRANA BnaA02g02990D protein OS=Bras	22	190	1	2092800	2085000	2514100	2.23063e+06	0	1203500	3136600	1446700	1458000	0	1162500	873500	0	0	0	0	0	472690	0	157563	2720500	1746800	1550000	2.00577e+06	0	6627700	6586300	4.40467e+06	3747400	4461700	1997300	3.40213e+06
A0A078GMQ6	At1g72550	tRNA synthetase beta subunit family protein	tr|A0A078GMQ6|A0A078GMQ6_BRANA BnaA03g56470D protein OS=Brassica napus GN=BnaC09g41860D PE=4 SV=1;tr|A0A078C375|A0A078C375_BRANA BnaA10g18320D protein OS=Brassica napus GN=BnaA10g18320D PE=4 SV=1;tr|A0A078IXL6|A0A078IXL6_BRANA BnaC08g47290D protein OS=Bras	22.849	199	1	15002000	1800500	0	5.60083e+06	13591000	0	0	4.53033e+06	0	5755100	0	1.91837e+06	11990000	7007100	6744900	8.58067e+06	0	0	0	0	16781000	15750000	0	1.08437e+07	0	0	0	0	23750000	9549900	0	1.11e+07
A0A078C3F0	At3g02900	Low-density receptor-like protein	tr|A0A078C3F0|A0A078C3F0_BRANA BnaC03g07880D protein OS=Brassica napus GN=BnaC03g07880D PE=4 SV=1	18.425	173	1	0	0	0	0	0	0	0	0	0	0	0	0	0	0	0	0	0	0	0	0	0	0	0	0	0	0	0	0	0	0	0	0
A0A078C3M3	NLAL2	H/ACA ribonucleoprotein complex subunit 1-like protein 2	tr|A0A078C3M3|A0A078C3M3_BRANA H/ACA ribonucleoprotein complex subunit OS=Brassica napus GN=BnaC03g08830D PE=3 SV=1;tr|A0A078IJK0|A0A078IJK0_BRANA H/ACA ribonucleoprotein complex subunit OS=Brassica napus GN=BnaA03g06930D PE=3 SV=1;tr|A0A078GTY6|A0A078GTY6	20.461	198	1	0	0	0	0	0	0	0	0	0	0	0	0	7242500	0	0	2.41417e+06	0	0	0	0	0	0	3702300	1234100	0	21975000	0	7325000	0	0	0	0
A0A078C3M5	RPL10AB	60S ribosomal protein L10a-2	tr|A0A078C3M5|A0A078C3M5_BRANA BnaC04g16800D protein OS=Brassica napus GN=BnaC04g16800D PE=4 SV=1;tr|A0A078ETH3|A0A078ETH3_BRANA BnaA07g13270D protein OS=Brassica napus GN=BnaA07g13270D PE=4 SV=1;tr|A0A078H195|A0A078H195_BRANA Ribosomal protein OS=Brassica	16.559	146	2	0	0	0	0	0	0	0	0	0	0	0	0	0	0	0	0	0	0	0	0	826920	502160	0	443027	0	6551000	3243100	3264700	2421700	4718100	982680	2.70749e+06
A0A078EXW3	ODPB1	Pyruvate dehydrogenase E1 component subunit beta-1	tr|A0A078EXW3|A0A078EXW3_BRANA BnaA10g05930D protein OS=Brassica napus GN=BnaA10g05930D PE=4 SV=1;tr|A0A078C3S8|A0A078C3S8_BRANA BnaC09g26770D protein OS=Brassica napus GN=BnaC09g26770D PE=4 SV=1;tr|A0A078FVB3|A0A078FVB3_BRANA BnaA02g11520D protein OS=Bras	39.247	364	5	12848000	19895000	85329000	3.93573e+07	213240000	110890000	186200000	170110000	104850000	86632000	152700000	1.14727e+08	530930000	210400000	212330000	3.17887e+08	70623000	482300000	175770000	2.42898e+08	455610000	330880000	424860000	4.03783e+08	32828000	177430000	266290000	1.58849e+08	287200000	201230000	259480000	2.49303e+08
A0A078C3T4	TBB6	Tubulin beta-6 chain	tr|A0A078C3T4|A0A078C3T4_BRANA Tubulin beta chain OS=Brassica napus GN=BnaA10g20420D PE=3 SV=1;tr|A0A078E553|A0A078E553_BRANA Tubulin beta chain OS=Brassica napus GN=BnaC09g44450D PE=3 SV=1	52.029	461	1	0	44039000	0	1.46797e+07	25182000	44336000	138000000	6.91727e+07	0	29455000	0	9.81833e+06	0	0	0	0	0	15044000	7835800	7626600	8393200	0	0	2.79773e+06	0	9993500	10293000	6.76217e+06	12235000	0	14536000	8.92367e+06
A0A078DUA3	PAP8	Probable plastid-lipid-associated protein 8	tr|A0A078DUA3|A0A078DUA3_BRANA BnaA10g15260D protein OS=Brassica napus GN=BnaA10g15260D PE=4 SV=1;tr|A0A078C3X0|A0A078C3X0_BRANA BnaC03g09830D protein OS=Brassica napus GN=BnaC03g09830D PE=4 SV=1;tr|A0A078HDD3|A0A078HDD3_BRANA BnaC09g37690D protein OS=Bras	25.425	230	1	24630000	0	0	8210000	8072400	0	103110000	37060800	0	0	0	0	0	11017000	0	3.67233e+06	0	0	11882000	3.96067e+06	14340000	0	0	4780000	0	12787000	18818000	10535000	0	0	0	0
A0A078GKV6	RD21B	Probable cysteine protease RD21B	tr|A0A078GKV6|A0A078GKV6_BRANA BnaC02g30040D protein OS=Brassica napus GN=BnaC02g30040D PE=3 SV=1;tr|A0A078G7A3|A0A078G7A3_BRANA BnaA06g36920D protein OS=Brassica napus GN=BnaA06g36920D PE=3 SV=1;tr|A0A078C407|A0A078C407_BRANA BnaC04g17750D protein OS=Bras	50.694	460	2	42265000	0	6605900	16290300	62487000	24333000	57618000	48146000	14530000	18833000	13607000	1.56567e+07	9023700	108280000	15946000	4.44166e+07	17241000	97250000	57301000	57264000	79160000	97218000	88357000	88245000	0	56136000	4697300	2.02778e+07	45646000	40403000	104740000	6.35963e+07
A0A078C4B3	CYSC1	Bifunctional L-3-cyanoalanine synthase/cysteine synthase C1	tr|A0A078C4B3|A0A078C4B3_BRANA Cysteine synthase OS=Brassica napus GN=BnaC08g31370D PE=3 SV=1;tr|A0A078IHN8|A0A078IHN8_BRANA BnaA09g39180D protein OS=Brassica napus GN=BnaA09g39180D PE=4 SV=1	39.923	368	3	0	0	64560000	21520000	17811000	24501000	0	14104000	139230000	137130000	75355000	1.17238e+08	47632000	21428000	31250000	3.34367e+07	58335000	58107000	33131000	4.98577e+07	0	0	0	0	3481100	64964000	31916000	33453700	41537000	13485000	124990000	60004000
A0A078C4D6	At5g09660	Malate dehydrogenase	tr|A0A078C4D6|A0A078C4D6_BRANA BnaA10g22420D protein OS=Brassica napus GN=BnaA10g22420D PE=4 SV=1	59.371	552	1	1275600	0	0	425200	0	0	14021000	4.67367e+06	0	0	0	0	0	0	0	0	13493000	0	0	4.49767e+06	9927400	24740000	0	11555800	0	0	0	0	0	0	0	0
A0A078J2U0	At3g61870		tr|A0A078J2U0|A0A078J2U0_BRANA BnaA09g55550D protein OS=Brassica napus GN=BnaA09g55550D PE=4 SV=1;tr|A0A078C4E1|A0A078C4E1_BRANA BnaC08g31740D protein OS=Brassica napus GN=BnaC08g31740D PE=4 SV=1	29.651	272	1	0	0	0	0	0	0	0	0	0	0	0	0	0	0	0	0	0	0	0	0	0	0	0	0	0	0	0	0	0	0	0	0
A0A078DCK4	H2B9	Histone H2B.9	tr|A0A078DCK4|A0A078DCK4_BRANA Histone H2B OS=Brassica napus GN=BnaC03g55640D PE=3 SV=1;tr|A0A078INV5|A0A078INV5_BRANA Histone H2B OS=Brassica napus GN=BnaA07g37600D PE=3 SV=1;tr|A0A078EE93|A0A078EE93_BRANA Histone H2B OS=Brassica napus GN=BnaA06g18250D PE	14.556	132	1	58445000	33494000	45698000	45879000	13518000	483620000	0	1.65713e+08	34931000	15416000	59278000	3.65417e+07	8803200	15121000	0	7.97473e+06	0	32840000	0	1.09467e+07	342880000	451100000	0	264660000	8432000000	9684700	164290000	2.86866e+09	54024000	48664000	14201000	38963000
A0A078C4M4	TKTC1	Transketolase-1	tr|A0A078C4M4|A0A078C4M4_BRANA BnaC08g30890D protein OS=Brassica napus GN=BnaC08g30890D PE=4 SV=1	79.624	739	1	4374700	0	2163700	2.17947e+06	23839000	20512000	0	1.47837e+07	0	0	0	0	34071000	17570000	30629000	2.74233e+07	0	0	0	0	46575000	47609000	36676000	43620000	34295000	0	56579000	3.02913e+07	0	11181000	0	3727000
A0A078C4Q2	RPL37AC	60S ribosomal protein L37a-2	tr|A0A078C4Q2|A0A078C4Q2_BRANA BnaC08g30490D protein OS=Brassica napus GN=BnaC08g30490D PE=3 SV=1;tr|A0A078DPF9|A0A078DPF9_BRANA BnaA04g01280D protein OS=Brassica napus GN=BnaA04g01280D PE=3 SV=1;tr|A0A078JGK6|A0A078JGK6_BRANA BnaC06g42830D protein (Fragme	12.4	111	1	248800	185000	0	144850	170980	180440	265160	205527	0	0	0	0	0	0	0	0	0	0	0	0	778960	526090	376860	560637	3249000	3969500	1511100	2.90987e+06	187440	192070	0	126503
A0A078C4S3	RS41	40S ribosomal protein S4-1	tr|A0A078C4S3|A0A078C4S3_BRANA 40S ribosomal protein S4 OS=Brassica napus GN=BnaA10g23570D PE=3 SV=1;tr|A0A078J6M9|A0A078J6M9_BRANA 40S ribosomal protein S4 OS=Brassica napus GN=BnaA03g55550D PE=3 SV=1;tr|A0A078CWE3|A0A078CWE3_BRANA 40S ribosomal protein S	30.535	269	5	162520000	56540000	58116000	92392000	75255000	129200000	124110000	1.09522e+08	137770000	79566000	112340000	109892000	111150000	100430000	113020000	108200000	44378000	53209000	67855000	5.51473e+07	51267000	82242000	145510000	9.30063e+07	2475800	264150000	247070000	1.71232e+08	189830000	120770000	124340000	144980000
A0A078C4U0	ILV5	Ketol-acid reductoisomerase	tr|A0A078C4U0|A0A078C4U0_BRANA Ketol-acid reductoisomerase OS=Brassica napus GN=BnaC08g29320D PE=3 SV=1;tr|A0A078IEF0|A0A078IEF0_BRANA BnaA09g55140D protein OS=Brassica napus GN=BnaA09g55140D PE=4 SV=1	62.888	581	3	212710000	0	39279000	8.39963e+07	52790000	55764000	28844000	4.57993e+07	31407000	0	27073000	1.94933e+07	30610000	24322000	20750000	2.52273e+07	20821000	23295000	39650000	27922000	248580000	169680000	120710000	1.79657e+08	0	45463000	0	1.51543e+07	20623000	0	0	6.87433e+06
A0A078I6V6	SIR	Assimilatory sulfite reductase (ferredoxin)(AtSiR) (EC 1.8.7.1)	tr|A0A078I6V6|A0A078I6V6_BRANA BnaC09g50680D protein OS=Brassica napus GN=BnaC09g50680D PE=4 SV=1;tr|A0A078C5F1|A0A078C5F1_BRANA BnaA10g25620D protein OS=Brassica napus GN=BnaA10g25620D PE=4 SV=1	72.312	645	2	1080100	2315500	7369100	3.58823e+06	0	634830	944340	526390	40790000	5331800	15233000	20451600	1456400	1148200	1000300	1.20163e+06	21410000	9003900	510420	1.03081e+07	13332000	12292000	10299000	1.19743e+07	0	0	904400	301467	0	0	0	0
A0A078C5K7	MED24.18	Thioredoxin family protein	tr|A0A078C5K7|A0A078C5K7_BRANA BnaA10g26270D protein OS=Brassica napus GN=BnaA10g26270D PE=4 SV=1;tr|A0A078HXF1|A0A078HXF1_BRANA BnaCnng10640D protein OS=Brassica napus GN=BnaCnng10640D PE=4 SV=1;tr|A0A078FD77|A0A078FD77_BRANA BnaA03g01120D protein OS=Bras	36.85	335	1	0	0	0	0	23514000	0	0	7838000	0	0	0	0	0	49785000	29342000	2.63757e+07	0	0	23913000	7971000	0	48383000	35169000	2.78507e+07	0	0	0	0	55720000	40337000	64671000	53576000
A0A078GPW1	ASNAP2	Alpha-soluble NSF attachment protein 2 (Alpha-SNAP2)	tr|A0A078GPW1|A0A078GPW1_BRANA BnaA09g35650D protein OS=Brassica napus GN=BnaA09g35650D PE=4 SV=1;tr|A0A078C5Q9|A0A078C5Q9_BRANA BnaC08g27140D protein OS=Brassica napus GN=BnaC08g27140D PE=4 SV=1;tr|A0A078JAK4|A0A078JAK4_BRANA BnaC04g55510D protein OS=Bras	32.696	289	2	0	7864700	6726300	4.86367e+06	8543400	9937600	0	6.16033e+06	10633000	0	0	3.54433e+06	0	9111400	11916000	7.00913e+06	8589400	0	8621300	5736900	11363000	0	0	3.78767e+06	12336000	5963300	0	6.09977e+06	0	6668500	0	2.22283e+06
A0A078C5U2	S17P	Sedoheptulose-1,7-bisphosphatase	tr|A0A078C5U2|A0A078C5U2_BRANA BnaC08g26740D protein OS=Brassica napus GN=BnaC08g26740D PE=3 SV=1;tr|A0A078ELS9|A0A078ELS9_BRANA BnaC04g25260D protein OS=Brassica napus GN=BnaC04g25260D PE=3 SV=1;tr|A0A078BSH4|A0A078BSH4_BRANA BnaA07g16660D protein OS=Bras	42.552	394	1	795000	2575800	1233500	1.53481e+06	33665000	0	11035000	14900000	8318400	4195100	4195700	5.56973e+06	3325100	0	26343000	9.88937e+06	64701000	42405000	14362000	4.04893e+07	52562000	24895000	91019000	5.61587e+07	0	114420000	66961000	6.04603e+07	7123700	0	7964800	5029500
A0A078IEI0	CBSX2	CBS domain-containing protein CBSX2(AtCDCP1)	tr|A0A078IEI0|A0A078IEI0_BRANA BnaA03g50880D protein OS=Brassica napus GN=BnaA03g50880D PE=4 SV=1;tr|A0A078C5Y4|A0A078C5Y4_BRANA BnaC07g44730D protein OS=Brassica napus GN=BnaC07g44730D PE=4 SV=1	24.481	228	1	17090000	0	0	5.69667e+06	0	12673000	14679000	9.11733e+06	0	92758000	97384000	6.33807e+07	0	0	0	0	35888000	44674000	11610000	30724000	0	0	0	0	0	7717800	0	2572600	0	0	0	0
A0A078GIL3	RPT4A	26S proteasome regulatory subunit 10B homolog A	tr|A0A078GIL3|A0A078GIL3_BRANA BnaC02g30020D protein OS=Brassica napus GN=BnaC02g30020D PE=3 SV=1;tr|A0A078GCF0|A0A078GCF0_BRANA BnaA06g36950D protein OS=Brassica napus GN=BnaA06g36950D PE=3 SV=1;tr|A0A078ES86|A0A078ES86_BRANA BnaA02g23370D protein OS=Bras	44.821	399	4	4741500	0	5074200	3271900	49450000	56823000	66706000	5.76597e+07	136160000	22077000	6514800	5.49173e+07	28896000	10252000	27679000	2.22757e+07	0	0	66125000	2.20417e+07	32789000	20006000	9865900	2.0887e+07	871970000	3827100	48505000	308100700	66120000	68701000	9768800	48196600
A0A078IR76	CCOAOMT1	S-adenosyl-L-methionine-dependent methyltransferases superfamily protein	tr|A0A078IR76|A0A078IR76_BRANA BnaA08g11640D protein OS=Brassica napus GN=BnaA08g11640D PE=4 SV=1;tr|A0A078IH23|A0A078IH23_BRANA BnaA03g50850D protein OS=Brassica napus GN=BnaA03g50850D PE=4 SV=1;tr|A0A078C6A5|A0A078C6A5_BRANA BnaC07g44690D protein OS=Bras	29.024	258	2	173800000	194860000	0	1.22887e+08	72610000	127720000	70852000	90394000	0	0	118380000	39460000	0	0	0	0	0	0	0	0	0	0	0	0	0	0	0	0	57162000	59200000	24374000	46912000
A0A078GP17	LGALDH	L-galactose dehydrogenase (At-GalDH) (L-GalDH) (EC 1.1.1.316)	tr|A0A078GP17|A0A078GP17_BRANA BnaC03g66440D protein OS=Brassica napus GN=BnaC03g66440D PE=4 SV=1;tr|A0A078I9R9|A0A078I9R9_BRANA BnaA03g52690D protein OS=Brassica napus GN=BnaA03g52690D PE=4 SV=1;tr|A0A078C6E8|A0A078C6E8_BRANA BnaC07g44420D protein OS=Bras	33.417	304	1	1131500	1390300	1235200	1.25233e+06	0	1365900	1193600	853167	1958700	1329000	0	1095900	0	0	0	0	1308600	0	0	436200	1540500	1386500	0	975667	0	2555600	3514200	2.02327e+06	2221800	4094000	2999600	3.10513e+06
A0A078C6H5	ICDHP	Isocitrate dehydrogenase [NADP]	tr|A0A078C6H5|A0A078C6H5_BRANA Isocitrate dehydrogenase [NADP] OS=Brassica napus GN=BnaC03g06570D PE=3 SV=1;tr|A0A078CP30|A0A078CP30_BRANA Isocitrate dehydrogenase [NADP] OS=Brassica napus GN=BnaA03g04970D PE=3 SV=1	53.839	483	3	13201000	35947000	24302000	2.44833e+07	0	20738000	28678000	16472000	6890600	0	30507000	1.24659e+07	31736000	0	0	1.05787e+07	0	0	32080000	1.06933e+07	0	19749000	0	6583000	0	0	31729000	1.05763e+07	26735000	16345000	26234000	2.31047e+07
A0A078IEI5	VHA-H	V-type proton ATPase subunit H (V-ATPase subunit H)	tr|A0A078IEI5|A0A078IEI5_BRANA BnaA03g50930D protein OS=Brassica napus GN=BnaA03g50930D PE=4 SV=1;tr|A0A078C6K1|A0A078C6K1_BRANA BnaC07g44770D protein OS=Brassica napus GN=BnaC07g44770D PE=4 SV=1;tr|A0A078BXI7|A0A078BXI7_BRANA BnaC01g04210D protein OS=Bras	51.179	450	2	0	0	4415200	1.47173e+06	0	18651000	0	6217000	4139600	0	0	1.37987e+06	10353000	41462000	26986000	26267000	0	12372000	11554000	7.97533e+06	0	0	0	0	0	0	0	0	91526000	0	0	3.05087e+07
A0A078C6N1	CYP18-3	Peptidyl-prolyl cis-trans isomerase	tr|A0A078C6N1|A0A078C6N1_BRANA Peptidyl-prolyl cis-trans isomerase OS=Brassica napus GN=BnaC07g47630D PE=3 SV=1	18.384	172	2	0	0	0	0	0	0	0	0	0	0	0	0	0	0	0	0	0	0	0	0	0	0	0	0	23857000	0	0	7.95233e+06	5164700	0	0	1.72157e+06
A0A078C6T4	At1g71500	Putative uncharacterized protein	tr|A0A078C6T4|A0A078C6T4_BRANA BnaC06g32590D protein OS=Brassica napus GN=BnaC06g32590D PE=4 SV=1;tr|A0A078EA93|A0A078EA93_BRANA BnaA07g29390D protein OS=Brassica napus GN=BnaA07g29390D PE=4 SV=1	31.739	291	6	19200000	14625000	15049000	1.62913e+07	22024000	10037000	12106000	1.47223e+07	9228800	12090000	5540800	8953200	7503800	9792900	20042000	1.24462e+07	38338000	12008000	12601000	2.09823e+07	11758000	3982000	9154700	8.29823e+06	6579200	7350700	29921000	1.4617e+07	19516000	33599000	9701600	2.09389e+07
A0A078FV37	BOLA4	BolA-like family protein	tr|A0A078FV37|A0A078FV37_BRANA BnaC09g40360D protein OS=Brassica napus GN=BnaC09g40360D PE=3 SV=1;tr|A0A078CUE9|A0A078CUE9_BRANA BnaA03g06650D protein OS=Brassica napus GN=BnaA03g06650D PE=3 SV=1;tr|A0A078HJ08|A0A078HJ08_BRANA BnaA10g17180D protein OS=Bras	18.838	173	2	0	7147400	8344300	5163900	0	7615100	10422000	6.01237e+06	0	7823700	8388700	5.40413e+06	9583600	7378700	0	5654100	22774000	7127300	5459800	1.1787e+07	21461000	11734000	10615000	1.46033e+07	0	5613800	7276700	4.29683e+06	7587400	0	5422100	4336500
A0A078EBD4	RPL11A	60S ribosomal protein L11-1	tr|A0A078EBD4|A0A078EBD4_BRANA BnaC06g16830D protein OS=Brassica napus GN=BnaC06g16830D PE=3 SV=1;tr|A0A078HNK7|A0A078HNK7_BRANA BnaA01g09540D protein OS=Brassica napus GN=BnaAnng05780D PE=3 SV=1;tr|A0A078EHJ4|A0A078EHJ4_BRANA BnaAnng16950D protein OS=Bras	16.357	145	2	62443000	0	18008000	26817000	240860000	163470000	150420000	1.84917e+08	131280000	47589000	37395000	72088000	5622900	0	34515000	13379300	12728000	92382000	0	3.50367e+07	80065000	55604000	17751000	51140000	0	52355000	38943000	3.04327e+07	45875000	70928000	75086000	63963000
Q43395	WSCP	Cysteine protease inhibitor WSCP (AtWSCP)	tr|Q43395|Q43395_BRANA BnD22 drought induced protein OS=Brassica napus GN=BnaC06g33320D PE=2 SV=1;tr|A0A078C705|A0A078C705_BRANA BnaC06g33390D protein OS=Brassica napus GN=BnaC06g33390D PE=4 SV=1;tr|A0A078E382|A0A078E382_BRANA BnaA07g30010D protein OS=Bras	23.534	218	2	305240000	614000000	509020000	4.76087e+08	18937000	21167000	25721000	2.19417e+07	0	0	0	0	243660000	90888000	161170000	1.65239e+08	0	0	0	0	101210000	0	45550000	48920000	0	15815000	0	5.27167e+06	0	0	61878000	20626000
A0A078C716	At4g35690	Putative uncharacterized protein	tr|A0A078C716|A0A078C716_BRANA BnaC07g45770D protein OS=Brassica napus GN=BnaC07g45770D PE=4 SV=1	64.577	577	2	13303000	0	0	4.43433e+06	0	8102900	0	2.70097e+06	5137300	59082000	7285700	23835000	0	8056700	7666600	5241100	0	0	0	0	0	0	0	0	0	3764600	0	1.25487e+06	0	11974000	0	3.99133e+06
A0A078EAJ9	At1g72640	NAD(P)-binding Rossmann-fold superfamily protein	tr|A0A078EAJ9|A0A078EAJ9_BRANA BnaA07g30340D protein OS=Brassica napus GN=BnaA07g30340D PE=4 SV=1;tr|A0A078C749|A0A078C749_BRANA BnaC06g33790D protein OS=Brassica napus GN=BnaC06g33790D PE=4 SV=1	33.371	311	2	12246000	0	0	4082000	5863200	0	8344300	4.73583e+06	0	0	34549000	1.15163e+07	62506000	24970000	51321000	4.62657e+07	0	12134000	0	4.04467e+06	0	22808000	7562700	1.01236e+07	0	3540200	37664000	1.37347e+07	17141000	45046000	27035000	2.97407e+07
A0A078FLK4	RPS25E	40S ribosomal protein S25-4	tr|A0A078FLK4|A0A078FLK4_BRANA BnaA09g43060D protein OS=Brassica napus GN=BnaA09g43060D PE=4 SV=1;tr|A0A078C786|A0A078C786_BRANA BnaC07g47340D protein OS=Brassica napus GN=BnaC07g47340D PE=4 SV=1;tr|A0A078FCN6|A0A078FCN6_BRANA BnaC03g60460D protein OS=Bras	12.529	112	2	0	0	0	0	0	2705000	22019000	8.24133e+06	2067900	1823600	2339100	2.07687e+06	0	1518300	2591900	1.37007e+06	0	0	1792800	597600	6525600	7413100	8970300	7.63633e+06	0	12898000	9473700	7.45723e+06	0	0	4274700	1424900
A0A078C7A3	At4g38810	Calcium-binding EF-hand family protein	tr|A0A078C7A3|A0A078C7A3_BRANA BnaC07g47590D protein OS=Brassica napus GN=BnaC07g47590D PE=4 SV=1;tr|A0A078GBF9|A0A078GBF9_BRANA BnaA06g37340D protein OS=Brassica napus GN=BnaA06g37340D PE=4 SV=1	41.518	376	1	1972400	0	0	657467	0	1855200	3023600	1.62627e+06	3187900	0	0	1.06263e+06	0	0	0	0	0	5402000	5864000	3.75533e+06	0	0	0	0	0	0	0	0	0	2678500	7977800	3552100
A0A078GAI4	FBA2	Fructose-bisphosphate aldolase (EC 4.1.2.13)	tr|A0A078GAI4|A0A078GAI4_BRANA Fructose-bisphosphate aldolase OS=Brassica napus GN=BnaA06g37230D PE=3 SV=1;tr|A0A078C7F4|A0A078C7F4_BRANA Fructose-bisphosphate aldolase OS=Brassica napus GN=BnaC07g47470D PE=3 SV=1;tr|A0A078K3A7|A0A078K3A7_BRANA Fructose-bi	42.635	393	1	132390	139730	184870	152330	54400	0	73600	42666.7	183720	0	0	61240	150950	105720	75840	110837	166990	120940	0	95976.7	148370	122290	0	90220	346620	93150000	425100	31307240	152760	430980	117540	233760
A0A078E346	At1g71730	Gcn5-interacting protein	tr|A0A078E346|A0A078E346_BRANA BnaA07g29510D protein OS=Brassica napus GN=BnaA07g29510D PE=4 SV=1;tr|A0A078C7I2|A0A078C7I2_BRANA BnaC06g32700D protein OS=Brassica napus GN=BnaC06g32700D PE=4 SV=1	17.001	153	1	323860	727730	0	350530	0	0	5646700	1.88223e+06	0	599380	353740	317707	6042500	0	3062300	3.03493e+06	3946400	0	0	1.31547e+06	0	4244200	19650000	7.96473e+06	0	0	4114300	1.37143e+06	8497000	8600600	10830000	9309200
A0A078DHQ9	ADF3	Actin-depolymerizing factor 3	tr|A0A078DHQ9|A0A078DHQ9_BRANA BnaA03g09190D protein OS=Brassica napus GN=BnaA03g09190D PE=3 SV=1;tr|A0A078C7V3|A0A078C7V3_BRANA BnaC03g11520D protein OS=Brassica napus GN=BnaC03g11520D PE=3 SV=1	17.79	154	1	5677800	0	0	1892600	0	0	0	0	0	0	1899000	633000	0	5101400	3564600	2.88867e+06	13679000	0	0	4.55967e+06	5207100	0	0	1735700	0	0	0	0	0	0	96353000	3.21177e+07
A0A078C819	At4g31990	Aspartate aminotransferase	tr|A0A078C819|A0A078C819_BRANA Aspartate aminotransferase OS=Brassica napus GN=BnaC07g43610D PE=4 SV=1;tr|A0A078CDM6|A0A078CDM6_BRANA Aspartate aminotransferase OS=Brassica napus GN=BnaA01g04910D PE=4 SV=1	50.906	461	1	0	0	0	0	0	0	0	0	0	0	0	0	0	0	0	0	0	0	0	0	0	0	0	0	0	0	2048500	682833	5979700	43277000	58547000	3.59346e+07
A0A078D1N9	RBG5	Glycine-rich RNA-binding protein 5	tr|A0A078D1N9|A0A078D1N9_BRANA BnaC02g21260D protein OS=Brassica napus GN=BnaC02g21260D PE=4 SV=1;tr|A0A078JCW7|A0A078JCW7_BRANA BnaA02g35600D protein OS=Brassica napus GN=BnaA02g35600D PE=4 SV=1;tr|A0A078HXF6|A0A078HXF6_BRANA BnaC02g22820D protein OS=Bras	15.98	145	1	0	0	271180000	9.03933e+07	93940000	0	0	3.13133e+07	477460000	650870000	129690000	419340000	0	94689000	53132000	4.92737e+07	119360000	0	147350000	8.89033e+07	180160000	88489000	190940000	1.53196e+08	4699400	0	0	1.56647e+06	110520000	0	178560000	96360000
A0A078C8M2	CAT2	Catalase-2	tr|A0A078C8M2|A0A078C8M2_BRANA Catalase OS=Brassica napus GN=BnaC07g45360D PE=3 SV=1;tr|A0A078HQ06|A0A078HQ06_BRANA Catalase OS=Brassica napus GN=BnaA03g53180D PE=3 SV=1;tr|B1PRK0|B1PRK0_BRANA Catalase OS=Brassica napus PE=2 SV=1	55.357	480	2	35802000	35518000	19170000	3.01633e+07	0	16327000	16610000	10979000	6603700	9874000	8027700	8.16847e+06	14975000	23730000	0	1.29017e+07	20652000	11680000	11787000	1.47063e+07	2006200	29152000	2930500	11362900	0	970600	13807000	4.92587e+06	12940000	10744000	12266000	1.19833e+07
A0A078D9K2	SKP1B	SKP1-like protein 1B	tr|A0A078D9K2|A0A078D9K2_BRANA BnaA07g21520D protein OS=Brassica napus GN=BnaC06g22030D PE=3 SV=1;tr|Q2XVV8|Q2XVV8_BRANA SKP1 OS=Brassica napus GN=SKP1 PE=2 SV=1;tr|A0A078HQM9|A0A078HQM9_BRANA BnaA02g17620D protein OS=Brassica napus GN=BnaA02g17620D PE=3 S	16.932	151	1	24137000	19466000	3774800	15792600	0	54848000	0	1.82827e+07	0	0	0	0	30674000	0	11866000	14180000	0	0	0	0	0	22306000	12705000	1.16703e+07	0	23997000	15274000	1.30903e+07	73514000	0	0	2.45047e+07
A0A078C8P7	CDSP32	Thioredoxin-like protein	tr|A0A078C8P7|A0A078C8P7_BRANA BnaC06g36750D protein OS=Brassica napus GN=BnaC06g36750D PE=4 SV=1;tr|A0A078DK70|A0A078DK70_BRANA BnaA07g32300D protein OS=Brassica napus GN=BnaA07g32300D PE=4 SV=1	34.03	306	6	303520000	232010000	243750000	259760000	419590000	1403700000	520260000	7.81183e+08	56575000	115890000	135340000	1.02602e+08	397260000	425520000	922420000	5.81733e+08	117540000	390440000	142120000	216700000	1092200000	943520000	1654800000	1.23017e+09	1957800000	1124100000	622970000	1.23496e+09	321350000	198810000	440570000	3.20243e+08
A0A078C8R1	EMB2360	Glutathione reductase	tr|A0A078C8R1|A0A078C8R1_BRANA BnaC08g25420D protein OS=Brassica napus GN=BnaC08g25420D PE=3 SV=1;tr|A0A078JWG1|A0A078JWG1_BRANA BnaAnng31940D protein OS=Brassica napus GN=BnaAnng31940D PE=3 SV=1;tr|A0A078FJP3|A0A078FJP3_BRANA BnaC04g26180D protein OS=Bras	60.533	561	4	58422000	120160000	46201000	7.49277e+07	66267000	20023000	16945000	3.44117e+07	101260000	19431000	23425000	4.80387e+07	12015000	66144000	0	26053000	53452000	30398000	38556000	40802000	0	49875000	181330000	7.70683e+07	488390000	9923600	54667000	1.84327e+08	46525000	15711000	29772000	3.06693e+07
A0A078C8U9	At1g76140	Prolyl oligopeptidase family protein	tr|A0A078C8U9|A0A078C8U9_BRANA BnaC06g36830D protein OS=Brassica napus GN=BnaC06g36830D PE=4 SV=1;tr|A0A078J055|A0A078J055_BRANA BnaCnng28400D protein OS=Brassica napus GN=BnaCnng28400D PE=4 SV=1;tr|A0A078JVT3|A0A078JVT3_BRANA BnaCnng64630D protein OS=Bras	80.854	720	2	0	1749100	0	583033	2052500	1565700	2019100	1879100	8989800	0	0	2996600	1808600	1446200	728730	1.32784e+06	2933500	1494400	1126900	1851600	2451400	1878300	1608900	1.97953e+06	0	13357000	12793000	8.71667e+06	28385000	19895000	31688000	26656000
A0A078DEG1	ERD14	Dehydrin ERD14	tr|A0A078DEG1|A0A078DEG1_BRANA BnaA07g32420D protein OS=Brassica napus GN=BnaA07g32420D PE=4 SV=1;tr|A0A078C8V4|A0A078C8V4_BRANA BnaC06g36880D protein OS=Brassica napus GN=BnaC06g36880D PE=3 SV=1	22.021	195	1	375190	236980	643130	418433	0	0	0	0	983200	485200	607760	692053	0	223390	143890	122427	366660	271430	202740	280277	350490	401280	319540	357103	0	419140	204480	207873	1332300	1334400	1036400	1.23437e+06
A0A078J0S8	CAD9	Probable cinnamyl alcohol dehydrogenase 9 (AtCAD9) (EC 1.1.1.195)	tr|A0A078J0S8|A0A078J0S8_BRANA BnaA06g40660D protein OS=Brassica napus GN=BnaA06g40660D PE=3 SV=1;tr|A0A078C940|A0A078C940_BRANA BnaC07g47260D protein OS=Brassica napus GN=BnaC07g47260D PE=3 SV=1;tr|Q9S7R0|Q9S7R0_BRANA Cinnamyl alcohol dehydrogenase (Fragm	38.862	360	6	83306000	104640000	119430000	1.02459e+08	101130000	137300000	233910000	1.57447e+08	61247000	48671000	54121000	5.46797e+07	10233000	6186000	5145400	7.18813e+06	5223500	10275000	7070500	7523000	0	0	0	0	16759000	253000000	127840000	132533000	33811000	31353000	29968000	3.17107e+07
A0A078K0E0	CHI1	Chalcone--flavonone isomerase 1 (Chalcone isomerase 1) (EC 5.5.1.6)	tr|A0A078K0E0|A0A078K0E0_BRANA Chalcone-flavonone isomerase family protein OS=Brassica napus GN=BnaAnng37160D PE=3 SV=1;tr|A0A078C953|A0A078C953_BRANA Chalcone-flavonone isomerase family protein OS=Brassica napus GN=BnaC08g26010D PE=3 SV=1;tr|A0A078HQT5|A0	10.278	95	1	0	15967000	14311000	1.00927e+07	21806000	0	0	7.26867e+06	5269800	4849300	6495600	5.53823e+06	5078800	4161500	2511300	3917200	0	6071800	0	2.02393e+06	4684300	12624000	299550	5.86928e+06	0	5096300	0	1.69877e+06	31567000	4486200	0	1.20177e+07
A0A078C956	PRXIIE	Peroxiredoxin-2E	tr|A0A078C956|A0A078C956_BRANA BnaC08g24170D protein OS=Brassica napus GN=BnaC08g24170D PE=4 SV=1	24.16	230	1	186070000	386290000	112040000	2.28133e+08	79528000	93358000	96377000	8.97543e+07	211440000	312970000	469570000	3.31327e+08	31875000	21082000	0	1.76523e+07	0	0	0	0	242510000	14131000	182470000	1.4637e+08	0	135190000	147210000	9.41333e+07	0	124020000	158640000	94220000
A0A078F385	PUR5	Phosphoribosylformylglycinamidine cyclo-ligase(EC 6.3.3.1)	tr|A0A078F385|A0A078F385_BRANA BnaC06g15570D protein OS=Brassica napus GN=BnaC06g15570D PE=3 SV=1;tr|A0A078C968|A0A078C968_BRANA BnaC08g25860D protein OS=Brassica napus GN=BnaC08g25860D PE=3 SV=1;tr|A0A078IN80|A0A078IN80_BRANA BnaA09g54810D protein OS=Bras	40.727	385	2	987100	1859100	1590500	1478900	7330800	2035200	10282000	6.54933e+06	9701000	5138600	4252100	6363900	1920100	4871200	936190	2575830	4865100	9217800	0	4694300	1315000	6626700	1441700	3127800	0	1601100	2254600	1.28523e+06	3082300	1971800	3273400	2.77583e+06
A0A078IUR1	CP29B	RNA-binding protein CP29B(Ribonucleoprotein At2g37220)	tr|A0A078IUR1|A0A078IUR1_BRANA BnaA07g37730D protein OS=Brassica napus GN=BnaA07g37730D PE=4 SV=1;tr|A0A078JZ07|A0A078JZ07_BRANA BnaCnng73800D protein OS=Brassica napus GN=BnaCnng73800D PE=4 SV=1;tr|A0A078CLV8|A0A078CLV8_BRANA BnaA09g33760D protein OS=Bras	29.937	279	1	16708000	0	33713000	16807000	31203000	51200000	46856000	4.30863e+07	0	594730000	1107900000	5.67543e+08	3511700	7971700	5227500	5570300	89107000	135910000	0	7.50057e+07	3313600	2947600	1619500	2626900	0	4875300	4892600	3.25597e+06	14373000	33755000	18254000	2.21273e+07
A0A078HWF2	FOLD2	Bifunctional protein FolD 2	tr|A0A078HWF2|A0A078HWF2_BRANA BnaC05g40770D protein OS=Brassica napus GN=BnaC05g40770D PE=3 SV=1;tr|A0A078F5W3|A0A078F5W3_BRANA BnaA05g26750D protein OS=Brassica napus GN=BnaA05g26750D PE=3 SV=1;tr|A0A078EI32|A0A078EI32_BRANA BnaC03g37500D protein OS=Bras	31.599	298	1	0	10550000	17245000	9265000	69445000	0	15300000	2.82483e+07	0	6339800	0	2.11327e+06	62585000	52719000	53067000	5.61237e+07	0	17777000	0	5.92567e+06	62811000	47465000	0	3.67587e+07	0	0	24869000	8.28967e+06	0	102880000	0	3.42933e+07
A0A078C9R8	ENO2	Bifunctional enolase 2/transcriptional activator	tr|A0A078C9R8|A0A078C9R8_BRANA BnaC08g24110D protein OS=Brassica napus GN=BnaC08g24110D PE=3 SV=1	47.801	444	1	0	0	0	0	187360	0	0	62453.3	1550400	1039500	875960	1.15529e+06	0	0	0	0	0	0	0	0	0	6265300	0	2.08843e+06	417460000	0	1308900	1.3959e+08	0	0	0	0
A0A078CMM3	At3g52880	Monodehydroascorbate reductase 1	tr|A0A078CMM3|A0A078CMM3_BRANA BnaA09g33250D protein OS=Brassica napus GN=BnaA09g33250D PE=4 SV=1;tr|A0A078C9S3|A0A078C9S3_BRANA BnaC08g24060D protein OS=Brassica napus GN=BnaC08g24060D PE=4 SV=1	46.419	434	6	35821000	0	0	1.19403e+07	11466000	65513000	106540000	61173000	20824000	13190000	12461000	1.54917e+07	14890000	60760000	35843000	3.71643e+07	8253000	88443000	0	32232000	0	0	0	0	0	80323000	79643000	53322000	23623000	76029000	22018000	4.05567e+07
A0A078FJF0	At3g52990	Pyruvate kinase (EC 2.7.1.40)	tr|A0A078FJF0|A0A078FJF0_BRANA Pyruvate kinase OS=Brassica napus GN=BnaC06g14360D PE=3 SV=1;tr|A0A078CPZ4|A0A078CPZ4_BRANA Pyruvate kinase OS=Brassica napus GN=BnaA09g33340D PE=3 SV=1;tr|A0A078C9Z5|A0A078C9Z5_BRANA Pyruvate kinase OS=Brassica napus GN=BnaC	57.43	527	4	1224300	1845500	3554200	2208000	7103800	6757700	0	4620500	1073200	702400	1678300	1151300	17759000	3888400	5249200	8.96553e+06	4387200	2796100	4576900	3.92007e+06	3747400	14352000	8795200	8.96487e+06	0	0	13519000	4.50633e+06	22209000	13884000	16500000	17531000
A0A078DNA5	PSA7B	Proteasome subunit alpha type-7-B	tr|A0A078DNA5|A0A078DNA5_BRANA Proteasome subunit alpha type OS=Brassica napus GN=BnaA03g41260D PE=3 SV=1;tr|A0A078CS49|A0A078CS49_BRANA Proteasome subunit alpha type OS=Brassica napus GN=BnaA09g31830D PE=3 SV=1;tr|A0A078CA44|A0A078CA44_BRANA Proteasome su	27.355	250	3	96247000	136430000	110930000	1.14536e+08	35753000	64260000	63910000	54641000	0	0	0	0	87651000	50156000	28125000	5.53107e+07	0	37331000	31668000	2.29997e+07	0	0	0	0	0	0	56380000	1.87933e+07	0	33929000	0	1.13097e+07
A0A078CA48	PSRP2	30S ribosomal protein 2	tr|A0A078CA48|A0A078CA48_BRANA BnaC08g23480D protein OS=Brassica napus GN=BnaC08g23480D PE=4 SV=1;tr|A0A078CLL2|A0A078CLL2_BRANA BnaA09g32610D protein OS=Brassica napus GN=BnaA09g32610D PE=4 SV=1;tr|A0A078CPT9|A0A078CPT9_BRANA BnaA09g32640D protein OS=Bras	26.135	239	1	9089500	3358700	5906200	6.11813e+06	589090	7704100	11772000	6.6884e+06	11882000	3110300	6657500	7216600	7490000	6880100	6849500	7073200	4104600	4795000	2850800	3916800	5537300	6478700	3454300	5.15677e+06	715610	7797700	10026000	6179770	19953000	18707000	6483800	1.50479e+07
A0A078IX51	CDC48A	Cell division control protein 48 homolog A (AtCDC48a)	tr|A0A078IX51|A0A078IX51_BRANA BnaA05g28710D protein OS=Brassica napus GN=BnaA05g28710D PE=4 SV=1;tr|A0A078HV46|A0A078HV46_BRANA BnaC05g43180D protein OS=Brassica napus GN=BnaC05g43180D PE=4 SV=1;tr|A0A078F3G8|A0A078F3G8_BRANA BnaC03g35820D protein OS=Bras	89.513	808	3	17723000	73795000	92768000	6.14287e+07	17578000	92726000	47209000	5.25043e+07	0	36668000	0	1.22227e+07	44087000	14750000	24796000	2.78777e+07	18162000	33329000	15134000	2.22083e+07	0	0	0	0	346290000	29740000	43461000	1.3983e+08	82542000	71403000	77603000	7.71827e+07
A0A078IQZ7	RPL31	60S ribosomal protein L31-3	tr|A0A078IQZ7|A0A078IQZ7_BRANA 50S ribosomal protein L31 OS=Brassica napus GN=BnaC04g02660D PE=3 SV=1;tr|A0A078CXL5|A0A078CXL5_BRANA 50S ribosomal protein L31 OS=Brassica napus GN=BnaA05g02780D PE=3 SV=1;tr|A0A078I6A4|A0A078I6A4_BRANA 50S ribosomal protein	15.514	142	3	190430000	0	269230000	153220000	281750000	110550000	119340000	1.70547e+08	272580000	113440000	0	1.28673e+08	89254000	79768000	26958000	6.53267e+07	0	234160000	158490000	1.30883e+08	348920000	225220000	343310000	3.05817e+08	3712900000	49047000	73704000	1.27855e+09	114280000	144620000	197320000	1.52073e+08
A0A078CUH9	RPS14B	40S ribosomal protein S14-2	tr|A0A078CUH9|A0A078CUH9_BRANA BnaC03g19950D protein OS=Brassica napus GN=BnaC03g19950D PE=3 SV=1;tr|A0A078D702|A0A078D702_BRANA BnaC04g09160D protein OS=Brassica napus GN=BnaC04g09160D PE=3 SV=1;tr|A0A078D604|A0A078D604_BRANA BnaA03g16530D protein OS=Bras	16.543	152	2	11401000	28541000	30072000	23338000	0	6967000	6744600	4.57053e+06	47293000	78923000	40752000	55656000	0	0	0	0	14054000	12544000	7638700	1.14122e+07	730020	605060	1923800	1.08629e+06	0	7385500	22100000	9828500	3819000	3652200	5184700	4.21863e+06
A0A078CAJ5	MED37C	Probable mediator of RNA polymerase II transcription subunit 37c	tr|A0A078CAJ5|A0A078CAJ5_BRANA BnaA03g32320D protein OS=Brassica napus GN=BnaA03g32320D PE=3 SV=1;tr|A0A078EJ34|A0A078EJ34_BRANA BnaC03g37680D protein OS=Brassica napus GN=BnaC03g37680D PE=3 SV=1	71.359	652	3	21610000	17507000	55282000	3.14663e+07	1192600	9112200	4755300	5.02003e+06	7826600	15912000	6214300	9984300	10979000	7589200	3904400	7.49087e+06	15550000	8763500	4759700	9.69107e+06	6344800	6006700	10432000	7594500	0	15153000	14538000	9897000	21330000	4429700	35230000	20329900
A0A078CAK0	At3g12480	NF-YC11	tr|A0A078CAK0|A0A078CAK0_BRANA BnaA03g32270D protein OS=Brassica napus GN=BnaA03g32270D PE=4 SV=1;tr|A0A078EMU8|A0A078EMU8_BRANA BnaC03g37570D protein OS=Brassica napus GN=BnaC03g37570D PE=4 SV=1;tr|A0A078EI44|A0A078EI44_BRANA BnaC03g37600D protein OS=Bras	25.337	230	1	32477000	0	15635000	1.60373e+07	0	0	0	0	0	25850000	0	8.61667e+06	14472000	12821000	0	9.09767e+06	0	0	14337000	4779000	18337000	14335000	20610000	1.77607e+07	48883000	0	13177000	2.06867e+07	7951800	0	0	2650600
A0A078IA67	RPS5A	40S ribosomal protein S5-1	tr|A0A078IA67|A0A078IA67_BRANA BnaA03g17150D protein OS=Brassica napus GN=BnaA03g17150D PE=3 SV=1;tr|A0A078G1G6|A0A078G1G6_BRANA BnaA04g21290D protein OS=Brassica napus GN=BnaA04g21290D PE=3 SV=1;tr|A0A078F9M6|A0A078F9M6_BRANA BnaA05g27160D protein OS=Bras	22.972	207	3	96211000	28725000	161050000	9.53287e+07	57495000	224950000	134100000	1.38848e+08	178770000	241860000	126160000	1.82263e+08	340900000	60103000	72772000	157925000	99744000	22799000	375370000	165971000	607780000	334430000	322390000	4.21533e+08	432320000	108790000	280230000	273780000	242840000	380340000	435830000	3.53003e+08
A0A078F507	CCT7	T-complex protein 1 subunit eta (Chaperonin CCT7)	tr|A0A078F507|A0A078F507_BRANA BnaA05g27270D protein OS=Brassica napus GN=BnaA05g27270D PE=3 SV=1;tr|A0A078EIV6|A0A078EIV6_BRANA BnaC05g41380D protein OS=Brassica napus GN=BnaC05g41380D PE=3 SV=1;tr|A0A078IWZ6|A0A078IWZ6_BRANA BnaC03g73500D protein OS=Bras	54.226	504	2	2931200	4123500	0	2.35157e+06	0	12102000	9739200	7280400	0	0	0	0	0	0	0	0	0	0	0	0	0	10906000	0	3.63533e+06	152370000	6441100	0	5.2937e+07	3347700	11138000	2557500	5.68107e+06
A0A078JZQ5	SS2	Starch synthase 2 (AtSS2) (EC 2.4.1.21)	tr|A0A078JZQ5|A0A078JZQ5_BRANA BnaAnng38950D protein OS=Brassica napus GN=BnaAnng38950D PE=4 SV=1;tr|A0A078CAP5|A0A078CAP5_BRANA BnaC05g28320D protein OS=Brassica napus GN=BnaC05g28320D PE=4 SV=1	33.41	302	4	75428000	23660000	253790000	117626000	27904000	13385000	14276000	1.85217e+07	105860000	24475000	41191000	5.71753e+07	29929000	16981000	33941000	2.69503e+07	51233000	42671000	34001000	42635000	24297000	75262000	21259000	4.02727e+07	0	19136000	130830000	4.99887e+07	49244000	48147000	10404000	3.59317e+07
A0A078I1H0	RPL23A	60S ribosomal protein L23 (Protein EMBRYO DEFECTIVE 2171)	tr|A0A078I1H0|A0A078I1H0_BRANA BnaC05g47280D protein OS=Brassica napus GN=BnaC05g47280D PE=3 SV=1;tr|A0A078FT90|A0A078FT90_BRANA BnaA08g27920D protein OS=Brassica napus GN=BnaA08g27920D PE=3 SV=1;tr|A0A078CAS9|A0A078CAS9_BRANA BnaA03g28560D protein OS=Bras	15.008	140	2	27054000	0	7798800	11617600	3762900	246370000	48780000	9.96376e+07	0	9608000	13879000	7829000	63650000	89783000	0	5.11443e+07	0	0	13592000	4.53067e+06	0	328320000	498130000	2.75483e+08	0	240680000	0	8.02267e+07	141640000	247470000	210880000	1.99997e+08
A0A078DXJ2	At3g02480	Late embryogenesis abundant protein (LEA) family protein	tr|A0A078DXJ2|A0A078DXJ2_BRANA BnaC03g32950D protein OS=Brassica napus GN=BnaC03g32950D PE=4 SV=1;tr|A0A078CAZ6|A0A078CAZ6_BRANA BnaA03g27910D protein OS=Brassica napus GN=BnaA03g27910D PE=4 SV=1	7.286	69	1	0	0	0	0	0	0	0	0	735100	0	494730	409943	0	0	0	0	0	179190	0	59730	0	0	0	0	0	0	0	0	4992200	4836500	0	3.27623e+06
A0A078CB14	RS193	40S ribosomal protein S19-3	tr|A0A078CB14|A0A078CB14_BRANA BnaA03g27710D protein OS=Brassica napus GN=BnaA03g27710D PE=4 SV=1;tr|A0A078GEP8|A0A078GEP8_BRANA BnaA03g39990D protein OS=Brassica napus GN=BnaC07g31040D PE=4 SV=1;tr|A0A078HY98|A0A078HY98_BRANA BnaAnng06820D protein OS=Bras	15.812	143	1	0	0	0	0	343840000	375440000	0	239760000	0	888760000	205820000	364860000	0	0	0	0	0	49356000	0	16452000	0	0	0	0	0	0	0	0	179200000	116490000	234480000	1.76723e+08
A0A078CB24	GSTL2	Glutathione S-transferase L2	tr|A0A078CB24|A0A078CB24_BRANA BnaC08g25890D protein OS=Brassica napus GN=BnaC08g25890D PE=4 SV=1;tr|A0A078IK69|A0A078IK69_BRANA BnaA09g54850D protein OS=Brassica napus GN=BnaA09g54850D PE=4 SV=1	34.394	301	2	3425500	5279400	4059400	4.25477e+06	56780000	0	45603000	3.41277e+07	3886800	0	4122100	2.66963e+06	68830000	12286000	8398800	2.98383e+07	13544000	13901000	42152000	23199000	29359000	79571000	15260000	4.13967e+07	167050000	8165300	33004000	6.94064e+07	0	41008000	66936000	3.59813e+07
A0A078CB66	BCE2	Lipoamide acyltransferase component of branched-chain alpha-keto acid dehydrogenase complex	tr|A0A078CB66|A0A078CB66_BRANA Dihydrolipoamide acetyltransferase component of pyruvate dehydrogenase complex OS=Brassica napus GN=BnaA03g29700D PE=3 SV=1;tr|A0A078F4U7|A0A078F4U7_BRANA Dihydrolipoamide acetyltransferase component of pyruvate dehydrogenase	52.142	478	1	0	0	0	0	0	2631100	0	877033	0	0	0	0	0	0	0	0	0	0	1824500	608167	0	0	0	0	12707000	0	538510	4415170	2644100	3116200	0	1920100
A0A078GQS1	RPT5A	26S proteasome regulatory subunit 6A homolog A	tr|A0A078GQS1|A0A078GQS1_BRANA BnaA05g31700D protein OS=Brassica napus GN=BnaA05g31700D PE=3 SV=1;tr|A0A078G0H2|A0A078G0H2_BRANA BnaAnng02470D protein OS=Brassica napus GN=BnaAnng02660D PE=3 SV=1;tr|A0A078CBC4|A0A078CBC4_BRANA BnaA03g29050D protein OS=Bras	47.478	424	2	7323200	0	4505600	3.94293e+06	0	0	0	0	7321500	0	9363600	5561700	0	0	0	0	7953200	16596000	0	8.18307e+06	28773000	0	24359000	1.77107e+07	0	7263100	12688000	6.65037e+06	0	47012000	34020000	2.70107e+07
A0A078FWM7	CCT3	T-complex protein 1 subunit gamma (TCP-1-gamma)	tr|A0A078FWM7|A0A078FWM7_BRANA T-complex protein 1 subunit gamma OS=Brassica napus GN=BnaAnng03000D PE=3 SV=1;tr|A0A078CBG0|A0A078CBG0_BRANA T-complex protein 1 subunit gamma OS=Brassica napus GN=BnaA03g29270D PE=3 SV=1;tr|A0A078IGE0|A0A078IGE0_BRANA T-com	60.182	555	4	9104100	0	21693000	10265700	82888000	0	194140000	9.23427e+07	5044500	1057700000	0	3.54248e+08	57712000	111620000	42233000	7.05217e+07	0	60811000	125300000	62037000	61757000	0	0	2.05857e+07	84042000	18875000	21678000	4.15317e+07	101680000	135600000	26950000	8.80767e+07
A0A078CTF2	CCT8	T-complex protein 1 subunit theta TCP-1-theta	tr|A0A078CTF2|A0A078CTF2_BRANA BnaC06g19740D protein OS=Brassica napus GN=BnaC06g19740D PE=3 SV=1;tr|A0A078IP62|A0A078IP62_BRANA BnaA05g37290D protein OS=Brassica napus GN=BnaA05g37290D PE=3 SV=1;tr|A0A078HYC6|A0A078HYC6_BRANA BnaC05g47590D protein OS=Bras	28.442	264	1	957870	1355500	2198600	1503990	133600	1725800	1085200	981533	0	0	0	0	1641100	604460	251320	832293	0	0	0	0	905320	0	1045800	650373	0	1314400	2579000	1297800	4817400	4400000	4620100	4612500
U3MW26	S-ACP-DES5	Stearoyl-[acyl-carrier-protein] 9-desaturase 5(Stearoyl-ACP desaturase 5) (EC 1.14.19.2)	tr|U3MW26|U3MW26_BRANA Putative stearoyl-acyl carrier protein desaturase OS=Brassica napus GN=DES5b PE=2 SV=1;tr|A0A078DRU6|A0A078DRU6_BRANA BnaC03g33080D protein OS=Brassica napus GN=BnaC03g33080D PE=4 SV=1;tr|A0A078CBL0|A0A078CBL0_BRANA BnaA03g28050D pro	44.768	393	1	3213900	0	5672800	2.96223e+06	0	0	0	0	698830	504720	0	401183	0	0	0	0	4301200	0	3072500	2457900	5713900	4866700	3790000	4790200	144710000	0	0	4.82367e+07	4309800	0	8603300	4.30437e+06
A0A078CBL5	RPS7B	40S ribosomal protein S7-2	tr|A0A078CBL5|A0A078CBL5_BRANA BnaA03g28000D protein OS=Brassica napus GN=BnaA03g28000D PE=4 SV=1;tr|A0A078DRU2|A0A078DRU2_BRANA BnaC03g33030D protein OS=Brassica napus GN=BnaC03g33030D PE=4 SV=1	22.165	191	1	0	0	0	0	0	0	0	0	0	0	53856000	17952000	0	0	0	0	0	0	0	0	0	0	0	0	14326000	0	0	4.77533e+06	0	0	0	0
A0A078HJL2	HAT	Zinc finger BED domain-containing protein DAYSLEEPER (Transposase-like protein DAYSLEEPER)	tr|A0A078HJL2|A0A078HJL2_BRANA BnaC04g31350D protein OS=Brassica napus GN=BnaC04g31350D PE=4 SV=1;tr|A0A078CBL8|A0A078CBL8_BRANA BnaA04g09130D protein OS=Brassica napus GN=BnaA04g09130D PE=4 SV=1	73.371	647	1	0	0	0	0	0	0	0	0	0	4045100	0	1.34837e+06	0	0	0	0	0	0	8068000	2.68933e+06	9951300	12604000	10835000	11130100	61164000	0	1852400	2.10055e+07	90750000	0	0	30250000
A0A078J9Q1	RGP1	UDP-arabinopyranose mutase 1 (EC 5.4.99.30)	tr|A0A078J9Q1|A0A078J9Q1_BRANA BnaAnng16810D protein OS=Brassica napus GN=BnaAnng16810D PE=4 SV=1;tr|A0A078I298|A0A078I298_BRANA BnaC05g48410D protein OS=Brassica napus GN=BnaC05g48410D PE=4 SV=1;tr|A0A078HAG7|A0A078HAG7_BRANA BnaA01g33130D protein OS=Bras	40.504	357	3	0	3209700	4862200	2.69063e+06	3497400	11077000	12371000	8981800	3494300	0	0	1.16477e+06	0	0	0	0	8899500	13815000	0	7571500	25457000	6444300	34198000	22033100	71430000	11058000	7244900	2.9911e+07	14389000	35355000	36813000	2.88523e+07
A0A078IJM2	UREG	Urease accessory protein G	tr|A0A078IJM2|A0A078IJM2_BRANA BnaA03g50860D protein OS=Brassica napus GN=BnaA03g50860D PE=4 SV=1;tr|A0A078CBS3|A0A078CBS3_BRANA BnaC07g44700D protein OS=Brassica napus GN=BnaC07g44700D PE=4 SV=1	35.318	317	1	0	16992000	0	5664000	0	0	0	0	0	0	0	0	0	33786000	15432000	16406000	0	0	10924000	3.64133e+06	0	0	25806000	8602000	0	0	0	0	5764800	0	0	1921600
A0A078GP38	BGLU42	Beta-glucosidase 42 (AtBGLU42) (EC 3.2.1.21)	tr|A0A078GP38|A0A078GP38_BRANA BnaC06g12100D protein OS=Brassica napus GN=BnaC06g12100D PE=3 SV=1;tr|A0A078HP64|A0A078HP64_BRANA Beta-glucosidase OS=Brassica napus GN=BnaA05g12920D PE=3 SV=1;tr|A0A078HIJ6|A0A078HIJ6_BRANA Beta-glucosidase OS=Brassica napus	55.566	485	1	5408600	0	3742000	3050200	0	19299000	0	6433000	8072800	9206400	15129000	1.08027e+07	0	0	0	0	8533700	0	0	2.84457e+06	24120000	27085000	14946000	2.20503e+07	0	10936000	0	3.64533e+06	18883000	11492000	14598000	14991000
A0A078J1X1	AIG2LA	AIG2-like protein A (EC 2.3.2.-) (AIG2-like protein)	tr|A0A078J1X1|A0A078J1X1_BRANA BnaC04g55840D protein OS=Brassica napus GN=BnaC04g55840D PE=4 SV=1;tr|A0A078CC41|A0A078CC41_BRANA BnaA04g09570D protein OS=Brassica napus GN=BnaA04g09570D PE=4 SV=1	19.682	170	1	0	0	7170600	2390200	5349100	0	3258900	2.86933e+06	0	0	0	0	0	5612200	0	1.87073e+06	0	0	0	0	0	0	0	0	0	0	2854400	951467	12796000	0	3123900	5.30663e+06
A0A078CCB6	At4g37230	Photosystem II manganese-stabilising protein (PsbO) family	tr|A0A078CCB6|A0A078CCB6_BRANA BnaC07g46350D protein OS=Brassica napus GN=BnaC07g46350D PE=4 SV=1	34.078	319	1	0	0	1861300000	6.20433e+08	0	2831500000	3244800000	2.02543e+09	5292700000	0	0	1.76423e+09	0	0	0	0	0	0	0	0	824330000	7386200000	0	2.73684e+09	0	2351400000	0	783800000	0	0	0	0
A0A078HKL5	HISN4	Imidazole glycerol phosphate synthase hisHF(IGP synthase)	tr|A0A078HKL5|A0A078HKL5_BRANA BnaC04g31470D protein OS=Brassica napus GN=BnaC04g31470D PE=3 SV=1;tr|A0A078GVS3|A0A078GVS3_BRANA BnaC01g19110D protein OS=Brassica napus GN=BnaC01g19110D PE=3 SV=1;tr|A0A078CCC7|A0A078CCC7_BRANA BnaA04g09240D protein OS=Bras	63.515	584	3	3703100	8427900	10803000	7.64467e+06	21293000	18546000	0	1.32797e+07	16912000	5438800	5634000	9.32827e+06	37699000	5571200	1552500	14940900	13608000	44433000	31251000	29764000	22115000	22769000	13951000	1.96117e+07	203030000	16883000	26364000	8.20923e+07	15286000	13166000	36120000	21524000
A0A078J0B8	EMB1467	At5g37510 protein (NADH-ubiquinone dehydrogenase)	tr|A0A078J0B8|A0A078J0B8_BRANA BnaC04g55940D protein OS=Brassica napus GN=BnaC04g55940D PE=3 SV=1;tr|A0A078CCS9|A0A078CCS9_BRANA BnaA04g08090D protein OS=Brassica napus GN=BnaA04g08090D PE=3 SV=1	81.18	746	5	57163000	26626000	44274000	4.26877e+07	31387000	23026000	20947000	25120000	36868000	26559000	19100000	27509000	67325000	30212000	43170000	4.69023e+07	31214000	61130000	21715000	3.80197e+07	13772000	0	20379000	1.13837e+07	14175000	30097000	21573000	2.19483e+07	36691000	75920000	36306000	49639000
A0A078E340	PER12	Peroxidase 12 Atperox P12	tr|A0A078E340|A0A078E340_BRANA Peroxidase OS=Brassica napus GN=BnaA07g29460D PE=3 SV=1;tr|A0A078CCU2|A0A078CCU2_BRANA Peroxidase OS=Brassica napus GN=BnaC06g32660D PE=3 SV=1;tr|A0A078BUB7|A0A078BUB7_BRANA Peroxidase OS=Brassica napus GN=BnaA07g23450D PE=3	39.761	362	5	237280000	19492000	35734000	97502000	61259000	20760000	71724000	5.12477e+07	18588000	29781000	20970000	23113000	7161400	10009000	0	5.72347e+06	0	0	14839000	4.94633e+06	0	0	0	0	0	24603000	22064000	1.55557e+07	74696000	106460000	45539000	75565000
Q6QIW1	CAC3	Acetyl-coenzyme A carboxylase carboxyl transferase subunit alpha(ACCase subunit alpha) (EC 2.1.3.15)	tr|Q6QIW1|Q6QIW1_BRANA Chloroplast carboxyltransferase alpha subunit OS=Brassica napus PE=2 SV=1;tr|C0LLV6|C0LLV6_BRANA Chloroplast carboxyltransferase alpha subunit isoform 1 OS=Brassica napus GN=accA1 PE=3 SV=1;tr|A0A078FNM0|A0A078FNM0_BRANA BnaC03g21010	84.788	764	2	3133800	0	8057600	3.73047e+06	2349800	4343300	3719000	3470700	0	0	0	0	1400800	1130500	0	843767	3636200	1578000	0	1.73807e+06	4698200	0	1753500	2.15057e+06	0	5908900	0	1.96963e+06	2582100	2478600	2483300	2.51467e+06
S5Q913	PIP1-2	Aquaporin PIP1-2 (AtPIP1-2)	tr|S5Q913|S5Q913_BRANA Aquaporin PIP1-2 (Fragment) OS=Brassica napus PE=2 SV=1;tr|B1PRK2|B1PRK2_BRANA Putative aquaporin OS=Brassica napus PE=2 SV=1;tr|A0A078HJQ7|A0A078HJQ7_BRANA BnaA04g26560D protein OS=Brassica napus GN=BnaA04g26560D PE=3 SV=1;tr|A0A078	28.506	268	2	2502700	2392200	1980900	2.29193e+06	2912900	0	27048000	9.98697e+06	0	964260	0	321420	115800000	13156000	13819000	4.75917e+07	36310000	3300300	0	1.32034e+07	0	0	0	0	187880000	66663000	11298000	8.86137e+07	71150000	183340000	38983000	9.78243e+07
A0A078G0T0	CPFTSY	Cell division protein FtsY homolog	tr|A0A078G0T0|A0A078G0T0_BRANA BnaC04g04490D protein OS=Brassica napus GN=BnaC04g04490D PE=4 SV=1;tr|A0A078GL91|A0A078GL91_BRANA BnaC04g50450D protein OS=Brassica napus GN=BnaC04g50450D PE=4 SV=1;tr|A0A078HI93|A0A078HI93_BRANA BnaA04g26420D protein OS=Bras	39.01	361	1	6631600	0	4685600	3772400	0	0	10185000	3395000	0	0	0	0	0	0	0	0	2349600	0	7653300	3334300	15748000	13058000	31057000	1.99543e+07	0	4485500	0	1.49517e+06	0	4768000	0	1.58933e+06
A0A078CDB5			tr|A0A078CDB5|A0A078CDB5_BRANA BnaC06g34210D protein OS=Brassica napus GN=BnaC06g34210D PE=4 SV=1	23.255	214	4	52853000	16542000	30264000	3.32197e+07	33480000	10536000	45872000	2.99627e+07	0	12561000	11233000	7.93133e+06	187790000	156660000	121880000	1.55443e+08	31091000	114260000	74865000	7.34053e+07	28485000	46426000	15322000	3.00777e+07	0	24614000	22748000	1.57873e+07	4313000	19706000	3393000	9.13733e+06
A0A078CDF2	G3PC2	Glyceraldehyde-3-phosphate dehydrogenase GAPC2	tr|A0A078CDF2|A0A078CDF2_BRANA Glyceraldehyde-3-phosphate dehydrogenase OS=Brassica napus GN=BnaA03g28480D PE=3 SV=1	38.4	352	1	73088000	0	6816900	2.6635e+07	0	0	7307900	2.43597e+06	0	0	0	0	369890000	0	147700000	172530000	11156000	260650000	0	90602000	0	187410000	0	62470000	0	0	47669000	1.58897e+07	1994400	38674000	0	1.35561e+07
A0A078DQB5	CYP22	Peptidyl-prolyl cis-trans isomerase CYP22 PPIase CYP22	tr|A0A078DQB5|A0A078DQB5_BRANA Peptidyl-prolyl cis-trans isomerase OS=Brassica napus GN=BnaC04g06640D PE=3 SV=1;tr|A0A078CDH4|A0A078CDH4_BRANA Peptidyl-prolyl cis-trans isomerase OS=Brassica napus GN=BnaA05g06380D PE=3 SV=1;tr|A0A078DWK6|A0A078DWK6_BRANA P	21.56	200	1	0	0	0	0	0	0	0	0	0	0	0	0	0	0	0	0	0	0	0	0	0	0	0	0	0	0	0	0	0	0	0	0
A0A078HFK7	APXS	L-ascorbate peroxidase S (EC 1.11.1.11)	tr|A0A078HFK7|A0A078HFK7_BRANA BnaAnng04450D protein OS=Brassica napus GN=BnaAnng04450D PE=3 SV=1;tr|A0A078CDJ5|A0A078CDJ5_BRANA BnaC09g25210D protein OS=Brassica napus GN=BnaC09g25210D PE=3 SV=1	38.93	355	6	66552000	34974000	102320000	6.79487e+07	68254000	20262000	44163000	4.42263e+07	100150000	63127000	66371000	7.65493e+07	17025000	79934000	37003000	44654000	59031000	132950000	68408000	8.67963e+07	18688000	41031000	14908000	2.48757e+07	0	17690000	34704000	1.74647e+07	26524000	77990000	39379000	4.79643e+07
A0A078DQ12	At2g37240	Thioredoxin-like protein AAED1	tr|A0A078DQ12|A0A078DQ12_BRANA BnaC04g08040D protein OS=Brassica napus GN=BnaC04g08040D PE=4 SV=1;tr|A0A078CDP7|A0A078CDP7_BRANA BnaA05g07230D protein OS=Brassica napus GN=BnaA05g07230D PE=4 SV=1	26.039	241	2	5771600	8754500	9341900	7956000	0	2944700	3810400	2251700	4018800	3024700	3378300	3.47393e+06	0	0	0	0	4480400	6146400	2071900	4232900	5344100	2396000	1631100	3.12373e+06	0	1651200	2730800	1.46067e+06	21635000	11521000	22343000	1.84997e+07
A0A078CDQ6	VDAC1	Mitochondrial outer membrane protein porin 1	tr|A0A078CDQ6|A0A078CDQ6_BRANA BnaA03g27530D protein OS=Brassica napus GN=BnaA03g27530D PE=4 SV=1	29.302	276	4	54755000	2155300	1723800	19544700	44198000	867070	951100	1.53387e+07	0	32102000	12495000	1.48657e+07	0	27087000	3850600	1.03125e+07	13188000	6898500	0	6695500	33997000	2080400	26688000	20921800	0	1440700	0	480233	35774000	34276000	37469000	3.58397e+07
S5PRZ5	PIP1.4	Probable aquaporin PIP1-4	tr|S5PRZ5|S5PRZ5_BRANA Aquaporin PIP1-4 (Fragment) OS=Brassica napus PE=2 SV=1;tr|A0A078IME1|A0A078IME1_BRANA BnaA09g51960D protein OS=Brassica napus GN=BnaA09g51960D PE=3 SV=1;tr|A0A078HJK8|A0A078HJK8_BRANA BnaCnng08780D protein OS=Brassica napus GN=BnaCn	27.495	259	1	0	0	2382200	794067	0	2067000	0	689000	0	0	0	0	0	6039500	0	2.01317e+06	6318200	1869300	0	2.72917e+06	2813300	3746100	0	2.18647e+06	0	0	6998600	2.33287e+06	0	0	8105900	2.70197e+06
A0A078EYK8	RPL5	50S ribosomal protein L5	tr|A0A078EYK8|A0A078EYK8_BRANA BnaCnng02050D protein OS=Brassica napus GN=BnaCnng02050D PE=3 SV=1;tr|A0A078DSL5|A0A078DSL5_BRANA BnaC03g31890D protein OS=Brassica napus GN=BnaC03g31890D PE=3 SV=1;tr|A0A078CDV9|A0A078CDV9_BRANA BnaA03g26930D protein OS=Bras	28.37	261	8	339220000	181450000	244040000	2.54903e+08	537690000	1171600000	759490000	8.22927e+08	506090000	226110000	298030000	343410000	17528000	77468000	14973000	3.66563e+07	120710000	522850000	705270000	449610000	989440000	1380800000	56912000	8.09051e+08	0	679300000	188160000	2.89153e+08	268800000	174110000	91502000	1.78137e+08
A0A078CDW6	GLDP1	Glycine dehydrogenase (decarboxylating) 1	tr|A0A078CDW6|A0A078CDW6_BRANA Glycine cleavage system P protein OS=Brassica napus GN=BnaA01g03860D PE=3 SV=1	114.2	1044	1	0	0	0	0	0	182190000	46894000	7.63613e+07	237930000	0	0	79310000	0	0	0	0	424950000	0	384960000	269970000	99344000	84126000	109060000	97510000	0	114630000	12578000	4.24027e+07	107930000	0	459780000	1.89237e+08
A0A078DSF2	SAM1	S-adenosylmethionine synthase 1 AdoMet synthase 1	tr|A0A078DSF2|A0A078DSF2_BRANA BnaC03g31390D protein OS=Brassica napus GN=BnaC03g31390D PE=4 SV=1;tr|A0A078CE02|A0A078CE02_BRANA BnaA03g26530D protein OS=Brassica napus GN=BnaA03g26530D PE=4 SV=1	39.796	364	1	2482300	3107400	3800300	3130000	504510	1256100	2509400	1.42334e+06	12296000	12044000	11277000	1.18723e+07	1483800	1523100	1794600	1600500	5770700	3857600	3556100	4394800	975870	1217200	1056200	1083090	0	0	1860900	620300	2882500	1986700	3118100	2.66243e+06
A0A078CEA0	GBSS1	Granule-bound starch synthase 1	tr|A0A078CEA0|A0A078CEA0_BRANA BnaC05g28330D protein OS=Brassica napus GN=BnaC05g28330D PE=4 SV=1	24.775	222	1	2875300	552900	3306200	2244800	0	97750	192520	96757.3	960950	0	558750	506567	0	0	0	0	323310	335890	0	219733	174780	80946	0	85242	0	2188700	3900900	2.02987e+06	554150	456640	182950	397913
A0A078FQZ9	RPS18A	40S ribosomal protein S18	tr|A0A078FQZ9|A0A078FQZ9_BRANA BnaC06g07900D protein OS=Brassica napus GN=BnaC06g07900D PE=3 SV=1;tr|A0A078DN93|A0A078DN93_BRANA BnaA03g24160D protein OS=Brassica napus GN=BnaA03g24160D PE=3 SV=1;tr|A0A078EFB2|A0A078EFB2_BRANA BnaC09g24880D protein OS=Bras	20.184	173	4	73142000	109750000	123180000	102024000	268140000	5602100	79876000	117872700	0	0	0	0	0	0	0	0	0	5617600	0	1.87253e+06	30090000	46343000	40269000	3.89007e+07	98472000	192010000	117250000	1.35911e+08	71063000	78767000	53194000	6.76747e+07
A0A078CEH0	ANN1	Annexin D1	tr|A0A078CEH0|A0A078CEH0_BRANA Annexin OS=Brassica napus GN=BnaC05g27530D PE=3 SV=1;tr|D9J167|D9J167_BRANA Annexin OS=Brassica napus GN=Ann1 PE=2 SV=1;tr|A0A078HJR9|A0A078HJR9_BRANA Annexin OS=Brassica napus GN=BnaAnng04520D PE=3 SV=1	36.1	317	4	158990000	129180000	99305000	1.29158e+08	13862000	10713000	44840000	2.31383e+07	41588000	36114000	154110000	7.72707e+07	116430000	114710000	58988000	9.67093e+07	42091000	33927000	13112000	29710000	0	0	0	0	0	42054000	75650000	3.92347e+07	181690000	285500000	242730000	236640000
Q42624	GLN2	Glutamine synthetase (EC 6.3.1.2)	sp|Q42624|GLNAC_BRANA Glutamine synthetase, chloroplastic OS=Brassica napus GN=GLN2 PE=2 SV=1;tr|A0A078CET5|A0A078CET5_BRANA Glutamine synthetase OS=Brassica napus GN=BnaA04g07450D PE=3 SV=1;tr|A0A078H865|A0A078H865_BRANA Glutamine synthetase OS=Brassica n	47.344	428	3	1294900000	797130000	272470000	7.88167e+08	192540000	169010000	292710000	2.18087e+08	106020000	1045000000	213900000	4.54973e+08	112150000	700850000	490370000	4.34457e+08	92871000	0	74557000	5.58093e+07	436790000	177560000	292990000	3.02447e+08	4008100000	0	126030000	1.37804e+09	0	15503000	44047000	19850000
A0A078CNA5	TSA1	Tryptophan synthase alpha chain	tr|A0A078CNA5|A0A078CNA5_BRANA BnaA09g34470D protein OS=Brassica napus GN=BnaA09g34470D PE=3 SV=1;tr|A0A078CEV3|A0A078CEV3_BRANA BnaC08g25400D protein OS=Brassica napus GN=BnaC08g25400D PE=3 SV=1	32.991	311	2	0	1818400	1619600	1146000	0	0	0	0	1617300	0	0	539100	0	0	0	0	0	0	3460300	1.15343e+06	1849300	1581700	0	1.14367e+06	289420000	0	0	9.64733e+07	0	6417200	2596300	3004500
A0A078E8C2	AT2G44640	TRIGALACTOSYLDIACYLGLYCEROL-like protein	tr|A0A078E8C2|A0A078E8C2_BRANA BnaC03g24890D protein OS=Brassica napus GN=BnaC03g24890D PE=4 SV=1;tr|A0A078IGF7|A0A078IGF7_BRANA BnaC04g05020D protein OS=Brassica napus GN=BnaC04g05020D PE=4 SV=1;tr|A0A078CEW4|A0A078CEW4_BRANA BnaA05g04200D protein OS=Bras	49.606	449	1	0	0	0	0	0	0	0	0	0	0	0	0	0	0	0	0	0	0	0	0	0	0	0	0	0	0	0	0	51671000	29265000	0	2.69787e+07
A0A078CEZ0	DHS2	Phospho-2-dehydro-3-deoxyheptonate aldolase 2	tr|A0A078CEZ0|A0A078CEZ0_BRANA Phospho-2-dehydro-3-deoxyheptonate aldolase OS=Brassica napus GN=BnaA01g03400D PE=3 SV=1	56.555	508	1	0	0	361300	120433	0	1943300	3554000	1.83243e+06	1059000	975070	0	678023	0	0	0	0	446570	928970	552590	642710	7375100	2082500	1046500	3.50137e+06	0	6036100	12213000	6.08303e+06	6258000	9073300	6611200	7.31417e+06
A0A078D2J9	GLO1	S)-2-hydroxy-acid oxidase GLO1	tr|A0A078D2J9|A0A078D2J9_BRANA BnaA03g33370D protein OS=Brassica napus GN=BnaA03g33370D PE=3 SV=1;tr|A0A078CF17|A0A078CF17_BRANA BnaC03g38540D protein OS=Brassica napus GN=BnaC03g38540D PE=3 SV=1	40.41	367	2	0	0	0	0	0	0	0	0	0	0	47647000	1.58823e+07	0	0	0	0	0	0	0	0	0	43760000	18482000	2.07473e+07	6037700	20220000	0	8.75257e+06	0	0	18148000	6.04933e+06
A0A078CF60	RPS20	30S ribosomal protein S20	tr|A0A078CF60|A0A078CF60_BRANA BnaC03g38990D protein OS=Brassica napus GN=BnaC03g38990D PE=3 SV=1;tr|A0A078H0S8|A0A078H0S8_BRANA BnaC01g36340D protein OS=Brassica napus GN=BnaC01g36340D PE=3 SV=1;tr|A0A078G3Y5|A0A078G3Y5_BRANA BnaA01g28980D protein OS=Bras	15.295	137	1	3520500	157960	253260	1.31057e+06	0	82400	1536400	539600	315310	0	0	105103	98188	263360	270450	210666	0	0	0	0	1077000	0	109610	395537	0	0	14752000	4.91733e+06	0	413360	0	137787
A0A078CFK8	PGK1	Phosphoglycerate kinase 1	tr|A0A078CFK8|A0A078CFK8_BRANA Phosphoglycerate kinase OS=Brassica napus GN=BnaA03g32440D PE=3 SV=1	50.526	484	1	236490000	0	94600000	1.10363e+08	0	469500000	488000000	3.19167e+08	32880000	68522000	46886000	4.94293e+07	97479000	263140000	377350000	2.4599e+08	58527000	580380000	459920000	3.66276e+08	2919500	79145000	493340000	191801500	1604200	319340000	327770000	2.16238e+08	81061000	401470000	57019000	179850000
A0A078CFP3			tr|A0A078CFP3|A0A078CFP3_BRANA BnaA04g02500D protein OS=Brassica napus GN=BnaA04g02500D PE=3 SV=1;tr|A0A078GZR9|A0A078GZR9_BRANA BnaC04g24330D protein OS=Brassica napus GN=BnaC04g24330D PE=3 SV=1	34.371	309	1	1869200	0	0	623067	0	0	0	0	64877000	18762000	7320200	3.03197e+07	23411000	3537700	4251600	10400100	0	0	5330400	1776800	0	5352200	6187000	3846400	0	0	0	0	0	8920100	0	2.97337e+06
A0A078CFQ1	SHM1	Serine hydroxymethyltransferase 1	tr|A0A078CFQ1|A0A078CFQ1_BRANA Serine hydroxymethyltransferase OS=Brassica napus GN=BnaA01g00170D PE=3 SV=1	57.244	517	1	82976000	138340000	32165000	8.44937e+07	60659000	132970000	62613000	85414000	300470000	0	0	1.00157e+08	0	0	0	0	0	0	0	0	145900000	77242000	65969000	9.63703e+07	0	140970000	0	46990000	55373000	40647000	44036000	4.66853e+07
A0A078CFR4	At5g06290	2-Cys peroxiredoxin BAS1-like	tr|A0A078CFR4|A0A078CFR4_BRANA BnaA03g31890D protein OS=Brassica napus GN=BnaA03g31890D PE=4 SV=1;tr|A0A078CAP4|A0A078CAP4_BRANA BnaA03g31870D protein OS=Brassica napus GN=BnaA03g31870D PE=4 SV=1;tr|A0A078J0Q2|A0A078J0Q2_BRANA BnaC03g73430D protein OS=Bras	32.817	299	2	0	1801500000	2637200000	1.47957e+09	501910000	24042000	232930000	2.52961e+08	2629800000	4219600000	691310000	2513570000	1402500000	168270000	471940000	6.80903e+08	6904800	1099100000	0	3.68668e+08	179790000	122830000	113350000	1.38657e+08	47176000	0	259850000	102342000	394550000	46933000	99208000	1.8023e+08
A0A078ITJ0	EIF3G1	Eukaryotic translation initiation factor 3 subunit G (eIF3g)	tr|A0A078ITJ0|A0A078ITJ0_BRANA Eukaryotic translation initiation factor 3 subunit G OS=Brassica napus GN=BnaCnng24840D PE=3 SV=1;tr|A0A078CFT1|A0A078CFT1_BRANA Eukaryotic translation initiation factor 3 subunit G OS=Brassica napus GN=BnaA03g31690D PE=3 SV=	32.379	294	2	24395000	14428000	0	12941000	0	0	10587000	3529000	0	38970000	21433000	2.01343e+07	0	5315300	8403100	4572800	21381000	16795000	0	1.27253e+07	16810000	11804800	5554100	1.13896e+07	0	4337400	0	1445800	9443200	3446000	0	4296400
A0A078J0I9	At3g13930	Dihydrolipoyllysine-residue acetyltransferase component 2 of pyruvate dehydrogenase complex(EC 2.3.1.12)	tr|A0A078J0I9|A0A078J0I9_BRANA Acetyltransferase component of pyruvate dehydrogenase complex OS=Brassica napus GN=BnaCnng28440D PE=3 SV=1;tr|A0A078D2N4|A0A078D2N4_BRANA Acetyltransferase component of pyruvate dehydrogenase complex OS=Brassica napus GN=BnaA	55.785	512	2	39285000	0	10722000	16669000	11329000	0	1278300	4.20243e+06	0	0	0	0	0	0	5512000	1.83733e+06	0	56558000	7586300	2.13814e+07	0	0	0	0	0	0	18290000	6.09667e+06	0	0	0	0
A0A078HU28	SIR	Assimilatory sulfite reductase (ferredoxin)	tr|A0A078HU28|A0A078HU28_BRANA BnaA01g31570D protein OS=Brassica napus GN=BnaA01g31570D PE=4 SV=1;tr|A0A078CFX0|A0A078CFX0_BRANA BnaA03g31290D protein OS=Brassica napus GN=BnaA03g31290D PE=4 SV=1;tr|A0A078JHA5|A0A078JHA5_BRANA BnaAnng23390D protein (Fragme	71.513	639	2	1618900	0	0	539633	23175000	12509000	8268100	14650700	45245000	57069000	0	3.41047e+07	0	0	0	0	40933000	0	0	1.36443e+07	208490000	0	0	6.94967e+07	0	5742600	7518200	4.42027e+06	0	0	0	0
Q07204	CFBP1	Fructose-1,6-bisphosphatase 1(FBPase1) (EC 3.1.3.11)	sp|Q07204|F16P1_BRANA Fructose-1,6-bisphosphatase, chloroplastic OS=Brassica napus GN=FBP PE=2 SV=1;tr|A0A078FJK5|A0A078FJK5_BRANA BnaC04g26530D protein OS=Brassica napus GN=BnaC04g26530D PE=3 SV=1;tr|A0A078CG64|A0A078CG64_BRANA BnaA04g04350D protein OS=Br	44.446	411	1	0	17837000	17534000	1.17903e+07	55534000	70062000	65752000	6.37827e+07	2259600	0	5091100	2.45023e+06	137420000	75056000	18906000	7.71273e+07	0	20081000	0	6.69367e+06	1445900	104890000	136670000	8.1002e+07	0	9493100	119550000	4.30144e+07	57037000	4409400	35290000	3.22455e+07
A0A078H9K8	LPD2	Dihydrolipoyl dehydrogenase 2(ptLPD2) (EC 1.8.1.4)	tr|A0A078H9K8|A0A078H9K8_BRANA Dihydrolipoyl dehydrogenase OS=Brassica napus GN=BnaC01g21970D PE=3 SV=1;tr|A0A078H345|A0A078H345_BRANA Dihydrolipoyl dehydrogenase OS=Brassica napus GN=BnaA01g17630D PE=3 SV=1;tr|A0A078CGA8|A0A078CGA8_BRANA Dihydrolipoyl deh	58.309	548	3	49205975	37400408	54255700	4.6954e+07	1199100	17395200	15776000	1.14568e+07	14195000	20592400	18675800	1.78211e+07	55386000	38179000	50211000	4.79253e+07	34922000	26544000	38506000	33324000	79369000	87514200	60326700	7.57366e+07	6973000	7689000	5300000	6654000	35859000	27255000	39539000	3.42177e+07
A0A078CGG4	SMD1A	Small nuclear ribonucleoprotein SmD1a	tr|A0A078CGG4|A0A078CGG4_BRANA BnaA03g30090D protein OS=Brassica napus GN=BnaA03g30090D PE=4 SV=1;tr|A0A078GBS1|A0A078GBS1_BRANA BnaC01g39780D protein OS=Brassica napus GN=BnaC01g39780D PE=4 SV=1;tr|Q2PWT6|Q2PWT6_BRANA Putative small nuclear ribonucleoprot	11.801	107	1	0	0	0	0	0	0	0	0	0	0	0	0	0	0	0	0	0	0	0	0	0	0	0	0	0	0	0	0	0	0	1732400	577467
A0A078CGH1	SYNC2	Asparagine--tRNA ligase	tr|A0A078CGH1|A0A078CGH1_BRANA BnaA03g29990D protein OS=Brassica napus GN=BnaA03g29990D PE=4 SV=1	31.06	290	3	179290000	167770000	63926000	1.36995e+08	0	43880000	0	1.46267e+07	14214000	468490000	298870000	2.60525e+08	133700000	74967000	0	6.95557e+07	271330000	178020000	147230000	198860000	14956000	80366000	17806000	3.77093e+07	0	55073000	0	1.83577e+07	118510000	73216000	159130000	116952000
A0A078J8F9	PPL1	PsbP-like protein 1(OEC23-like protein 4)	tr|A0A078J8F9|A0A078J8F9_BRANA BnaCnng38300D protein OS=Brassica napus GN=BnaCnng38300D PE=4 SV=1;tr|A0A078CGW6|A0A078CGW6_BRANA BnaA04g02660D protein OS=Brassica napus GN=BnaA04g02660D PE=4 SV=1	27.96	255	2	0	0	0	0	0	29893000	38624000	22839000	58198000	172760000	44073000	91677000	42344000	17871000	16096000	25437000	43664000	0	13608000	1.90907e+07	73369000	0	14412000	2.92603e+07	0	32464000	0	1.08213e+07	30992000	0	13045000	14679000
A0A078CGX2	CTIMC	Triosephosphate isomerase	tr|A0A078CGX2|A0A078CGX2_BRANA BnaA04g03590D protein OS=Brassica napus GN=BnaA04g03590D PE=3 SV=1	27.226	254	1	57100000	23058000	6284000	28814000	0	0	63095000	2.10317e+07	1364000	0	127840000	43068000	14722000	10743000	0	8.48833e+06	85009000	0	0	2.83363e+07	52416000	31048000	0	2.78213e+07	272480000	8984900	1593700	9.43529e+07	6147200	13345000	13297000	1.09297e+07
A0A078FJM7	T12E18_90	Eukaryotic aspartyl protease family protein(Nucleoid DNA-binding-like protein)	tr|A0A078FJM7|A0A078FJM7_BRANA BnaC04g26330D protein OS=Brassica napus GN=BnaC04g26330D PE=3 SV=1;tr|A0A078CH00|A0A078CH00_BRANA BnaA04g04140D protein OS=Brassica napus GN=BnaA04g04140D PE=3 SV=1	45.975	429	4	82476000	115790000	52742000	8.36693e+07	135700000	48947000	70065000	84904000	344280000	520760000	103690000	322910000	104720000	36209000	101810000	80913000	77542000	149560000	53578000	93560000	6647000	12192000	183780000	6.75397e+07	313290000	13324000	22333000	1.16316e+08	36876000	66770000	64601000	5.60823e+07
A0A078CH64	At3g55800	Sedoheptulose-1,7-bisphosphatase	tr|A0A078CH64|A0A078CH64_BRANA BnaA04g03360D protein OS=Brassica napus GN=BnaA04g03360D PE=3 SV=1	42.64	394	1	671530	877610	0	516380	2221000	16513000	1586400	6.77347e+06	849720	1020500	1309800	1.06001e+06	33197000	31078000	8559700	2.42782e+07	0	25508000	20668000	15392000	12120000	12120000	17397000	13879000	351840000	14183000	9924700	125315900	5841600	7256600	8057500	7051900
A0A078CHB8	CYP20-3	Peptidyl-prolyl cis-trans isomerase CYP20-3	tr|A0A078CHB8|A0A078CHB8_BRANA Peptidyl-prolyl cis-trans isomerase OS=Brassica napus GN=BnaC08g31970D PE=3 SV=1	27.427	253	1	0	0	0	0	0	0	0	0	0	0	0	0	0	0	0	0	0	0	0	0	0	0	0	0	4500200	0	0	1.50007e+06	0	0	0	0
A0A078FH48	At3g62310	RNA helicase family protein	tr|A0A078FH48|A0A078FH48_BRANA BnaA09g39790D protein OS=Brassica napus GN=BnaA09g39790D PE=4 SV=1;tr|A0A078CHD1|A0A078CHD1_BRANA BnaC08g32120D protein OS=Brassica napus GN=BnaC08g32120D PE=4 SV=1;tr|A0A078D2I5|A0A078D2I5_BRANA BnaA03g21690D protein OS=Bras	81.668	718	1	1204300	0	1589500	931267	0	4647700	0	1.54923e+06	823520	0	944200	589240	11332000	3020300	0	4784100	0	0	0	0	0	9174900	10245000	6473300	0	0	12670000	4.22333e+06	0	0	23553000	7851000
A0A078DX81	AGY1	Albino or Glassy Yellow 1	tr|A0A078DX81|A0A078DX81_BRANA Protein translocase subunit SecA OS=Brassica napus GN=BnaC03g31400D PE=3 SV=1;tr|A0A078CHD3|A0A078CHD3_BRANA Protein translocase subunit SecA OS=Brassica napus GN=BnaA03g26540D PE=3 SV=1	115.78	1025	1	510120	874530	1051500	812050	209540	569810	0	259783	350670	242870	477620	357053	0	730770	517660	416143	0	0	757450	252483	601360	0	315260	305540	0	711410	4554300	1.75524e+06	1061600	844360	0	635320
A0A078CHH0	AIG2LA	AIG2-like protein A	tr|A0A078CHH0|A0A078CHH0_BRANA BnaA04g09560D protein OS=Brassica napus GN=BnaA04g09560D PE=4 SV=1;tr|A0A078IZN9|A0A078IZN9_BRANA BnaC04g55830D protein OS=Brassica napus GN=BnaC04g55830D PE=4 SV=1	19.26	166	2	3028500	3778800	3835700	3.54767e+06	3389900	2679600	2315500	2795000	5393600	0	5274600	3.55607e+06	2696200	2216400	0	1.63753e+06	2741500	3431200	3583000	3251900	0	0	0	0	0	2926500	1710400	1.54563e+06	2296300	2532500	0	1609600
A0A078FEQ2	FC2	Ferrochelatase (EC 4.99.1.1)	tr|A0A078FEQ2|A0A078FEQ2_BRANA Ferrochelatase OS=Brassica napus GN=BnaA09g40430D PE=3 SV=1;tr|A0A078CHJ1|A0A078CHJ1_BRANA Ferrochelatase OS=Brassica napus GN=BnaC08g32870D PE=3 SV=1	54.914	495	1	0	0	0	0	0	0	0	0	0	0	0	0	0	0	0	0	0	0	0	0	0	0	0	0	0	0	0	0	0	0	0	0
A0A078FER4	At2g26340	Uncharacterized protein	tr|A0A078FER4|A0A078FER4_BRANA BnaA09g40530D protein OS=Brassica napus GN=BnaA09g40530D PE=4 SV=1;tr|A0A078CHK0|A0A078CHK0_BRANA BnaC08g32970D protein OS=Brassica napus GN=BnaC08g32970D PE=4 SV=1;tr|A0A078FES6|A0A078FES6_BRANA BnaA09g40200D protein OS=Bras	24.992	227	2	8095400	9884200	13711000	1.05635e+07	0	5528300	6287900	3.93873e+06	17225000	13411000	15748000	1.54613e+07	5992500	4679200	4948700	5206800	7480000	7965400	6525400	7323600	5728900	4709800	4584700	5007800	0	0	3794200	1.26473e+06	8861300	5659800	7569100	7363400
A0A078HH45	PGLP1B	Phosphoglycolate phosphatase 1B(EC 3.1.3.18)	tr|A0A078HH45|A0A078HH45_BRANA BnaC04g30020D protein OS=Brassica napus GN=BnaC04g30020D PE=4 SV=1;tr|A0A078CHY4|A0A078CHY4_BRANA BnaA04g07760D protein OS=Brassica napus GN=BnaA04g07760D PE=4 SV=1	39.569	359	11	1674300000	7750700000	1837300000	3754100000	1700700000	2195200000	2333000000	2076300000	853600000	1547400000	1445400000	1.28213e+09	1251400000	2667500000	2357700000	2092200000	3962800000	3113200000	3062000000	3.37933e+09	0	0	0	0	4000500000	1667700000	1186000000	2.28473e+09	887500000	627550000	546820000	687290000
A0A078CI03	RPL35	50S ribosomal protein L35	tr|A0A078CI03|A0A078CI03_BRANA 50S ribosomal protein L35 OS=Brassica napus GN=BnaC08g34270D PE=3 SV=1;tr|A0A078HAR5|A0A078HAR5_BRANA 50S ribosomal protein L35 OS=Brassica napus GN=BnaA09g41680D PE=3 SV=1;tr|A0A078HSG2|A0A078HSG2_BRANA 50S ribosomal protein	16.017	144	1	0	0	0	0	0	0	0	0	0	0	0	0	0	0	0	0	0	0	0	0	0	66956000	0	2.23187e+07	0	35744000	44101000	26615000	0	0	0	0
A0A078CI72	RPL32A	60S ribosomal protein L32-1	tr|A0A078CI72|A0A078CI72_BRANA BnaA01g08920D protein OS=Brassica napus GN=BnaA08g08550D PE=4 SV=1;tr|A0A078H6H8|A0A078H6H8_BRANA BnaA06g35970D protein OS=Brassica napus GN=BnaA06g35970D PE=4 SV=1	15.503	133	2	0	0	0	0	42079000	4543500	0	1.55408e+07	0	0	0	0	0	0	0	0	0	0	0	0	0	70789000	230730000	1.00506e+08	0	0	0	0	3471500	0	0	1.15717e+06
A0A078CI95	FLA8	Fasciclin-like arabinogalactan protein 8 AtAGP8	tr|A0A078CI95|A0A078CI95_BRANA BnaA05g04890D protein OS=Brassica napus GN=BnaA05g04890D PE=4 SV=1	42.81	416	2	16166000	0	9463000	8543000	24054000	32137000	10352000	22181000	12514000	13306000	14573000	1.34643e+07	0	0	0	0	45151000	41322000	25854000	3.74423e+07	36376000	173400000	32802000	8.08593e+07	0	24007000	37315000	2.04407e+07	41171000	39518000	39436000	4.00417e+07
A0A078F857	PAE7	Pectin acetylesterase (EC 3.1.1.-)	tr|A0A078F857|A0A078F857_BRANA Pectin acetylesterase OS=Brassica napus GN=BnaC03g63170D PE=3 SV=1;tr|A0A078CI96|A0A078CI96_BRANA Pectin acetylesterase OS=Brassica napus GN=BnaA08g09180D PE=3 SV=1;tr|A0A078EJ65|A0A078EJ65_BRANA Pectin acetylesterase OS=Bras	42.181	391	5	4102400	5330400	3064900	4165900	0	0	2266400	755467	21964000	11070000	10193000	14409000	0	0	0	0	5329800	7304400	3708300	5447500	1953400	2865700	2651800	2490300	22829000	4463100	4235200	10509100	53265000	7075000	5712600	2.20175e+07
A0A078CIE5	LHCB4.3	Chlorophyll a-b binding protein CP29.3	tr|A0A078CIE5|A0A078CIE5_BRANA Chlorophyll a-b binding protein, chloroplastic OS=Brassica napus GN=BnaA05g05540D PE=3 SV=1;tr|A0A078G7F6|A0A078G7F6_BRANA Chlorophyll a-b binding protein, chloroplastic OS=Brassica napus GN=BnaC04g05260D PE=3 SV=1	30.101	276	6	7838300	250230000	16191000	9.14198e+07	108510000	87940000	41455000	7.93017e+07	59412000	0	24096000	27836000	181040000	70196000	17645000	89627000	144780000	35316000	76923000	85673000	110290000	58011000	0	5.61003e+07	5737300000	100900000	229570000	2022590000	19010000	95341000	113370000	75907000
A0A078HDR3	TCTP1	Translationally-controlled tumor protein 1 (TCTP1)	tr|A0A078HDR3|A0A078HDR3_BRANA BnaA01g27710D protein OS=Brassica napus GN=BnaA01g27710D PE=3 SV=1;tr|A0A078GUN5|A0A078GUN5_BRANA BnaC01g35230D protein OS=Brassica napus GN=BnaC01g35230D PE=3 SV=1;tr|A0A078CYY3|A0A078CYY3_BRANA BnaA03g34250D protein OS=Bras	19.041	168	3	486430000	30952000	58768000	192050000	219690000	486960000	191480000	2.99377e+08	133060000	185380000	128290000	148910000	184450000	98995000	244500000	1.75982e+08	193980000	511520000	67923000	2.57808e+08	0	84286000	212020000	9.87687e+07	118800000	215800000	186180000	1.73593e+08	71914000	176280000	156720000	1.34971e+08
A0A078CZV2	METK4	S-adenosylmethionine synthase 4 AdoMet synthase 4	tr|A0A078CZV2|A0A078CZV2_BRANA S-adenosylmethionine synthase OS=Brassica napus GN=BnaA03g34510D PE=3 SV=1;tr|A0A078CIL5|A0A078CIL5_BRANA S-adenosylmethionine synthase OS=Brassica napus GN=BnaC03g39970D PE=3 SV=1	42.83	393	1	0	46380000	0	15460000	0	0	12406000	4.13533e+06	0	0	0	0	0	0	28551000	9517000	41379000	25036000	0	2.21383e+07	0	0	0	0	0	9429300	0	3143100	0	7444900	6956600	4800500
A0A078CIY2	At2g27720	60S acidic ribosomal protein family	tr|A0A078CIY2|A0A078CIY2_BRANA BnaC04g39260D protein OS=Brassica napus GN=BnaC04g39260D PE=3 SV=1;tr|A0A078GVP7|A0A078GVP7_BRANA BnaA04g15980D protein OS=Brassica napus GN=BnaA04g15980D PE=3 SV=1	11.497	113	2	225610000	46924000	16882000	96472000	81805000	55790000	23491000	5.36953e+07	37726000	57066000	84386000	59726000	245460000	178050000	68367000	163959000	21024000	63173000	58056000	4.74177e+07	50031000	0	33795000	27942000	591530	0	0	197177	22236000	43915000	34536000	3.35623e+07
A0A078CIY9	AXS2	UDP-D-apiose/UDP-D-xylose synthase 2	tr|A0A078CIY9|A0A078CIY9_BRANA BnaC04g39360D protein OS=Brassica napus GN=BnaC04g39360D PE=4 SV=1;tr|A0A078GZI5|A0A078GZI5_BRANA BnaA04g16090D protein OS=Brassica napus GN=BnaA04g16090D PE=4 SV=1	43.73	389	1	377260	0	562260	313173	0	84240	474900	186381	783970	0	584600	456190	597450	627840	403930	543073	0	220440	0	73480	380470	230200	0	203557	0	0	483680	161227	523290	432190	0	318493
A0A078HC11	At2g25970	Presenilin, (EC 3.4.23.)	tr|A0A078HC11|A0A078HC11_BRANA BnaA04g15300D protein OS=Brassica napus GN=BnaA04g15300D PE=4 SV=1;tr|A0A078CM08|A0A078CM08_BRANA BnaC04g38240D protein OS=Brassica napus GN=BnaC04g38240D PE=4 SV=1;tr|A0A078CIZ3|A0A078CIZ3_BRANA BnaC08g33230D protein OS=Bras	35.847	339	1	315120	332880	339620	329207	0	157530	270930	142820	5219100	0	4871400	3363500	0	0	0	0	0	284020	0	94673.3	0	0	0	0	0	0	0	0	245060	222090	0	155717
A0A078CJ01	At2g23110	Similar to late embryogenesis abundant proteins	tr|A0A078CJ01|A0A078CJ01_BRANA BnaC08g34610D protein OS=Brassica napus GN=BnaC08g34610D PE=4 SV=1	8.5082	82	1	3146200	3692400	5107700	3982100	0	2173200	3196700	1.78997e+06	79207000	26759000	51303000	52423000	3082300	2090700	1319700	2.16423e+06	0	11386000	4667600	5351200	0	0	0	0	0	0	794960	264987	3475800	3445200	2651500	3.19083e+06
A0A078CJ83	CTIMC	Triosephosphate isomerase, cytosolic TIM Triose-phosphate isomerase	tr|A0A078CJ83|A0A078CJ83_BRANA BnaA04g03580D protein OS=Brassica napus GN=BnaA04g03580D PE=3 SV=1;tr|A0A078EQK7|A0A078EQK7_BRANA BnaC04g25470D protein OS=Brassica napus GN=BnaC04g25470D PE=3 SV=1	27.249	254	1	0	0	0	0	0	0	0	0	0	0	0	0	0	9969700	0	3.32323e+06	0	0	0	0	0	0	0	0	0	0	4197800	1.39927e+06	0	0	0	0
A0A078I806	At2g21870	Probable ATP synthase 24 kDa subunit	tr|A0A078I806|A0A078I806_BRANA BnaCnng13880D protein OS=Brassica napus GN=BnaCnng13880D PE=4 SV=1;tr|A0A078CJ95|A0A078CJ95_BRANA BnaC08g35510D protein OS=Brassica napus GN=BnaC08g35510D PE=4 SV=1;tr|A0A078FRT4|A0A078FRT4_BRANA BnaA04g12500D protein OS=Bras	27.656	240	2	32492000	48573000	28239000	3.64347e+07	0	31045000	21659000	17568000	24995000	37151000	23695000	2.86137e+07	34745000	0	48710000	2.78183e+07	38287000	29522000	30089000	3.26327e+07	29206000	28231000	19854000	2.57637e+07	0	88913000	18342000	3.57517e+07	107870000	28742000	47964000	6.15253e+07
A0A078CJH5	PDE334	ATP synthase beta chain	tr|A0A078CJH5|A0A078CJH5_BRANA BnaA01g04740D protein OS=Brassica napus GN=BnaA01g04740D PE=3 SV=1	23.844	221	2	7598700	9899400	10334000	9.27737e+06	0	4003800	5008300	3.00403e+06	4894100	0	4740200	3.21143e+06	11093000	13734000	0	8.27567e+06	0	5961200	5053500	3.67157e+06	6000600	4274300	4369000	4881300	6771400	7421000	3729100	5.97383e+06	13753000	8909200	8511500	1.03912e+07
A0A078I782	RPL12B	50S ribosomal protein L12-2(CL12-B)	tr|A0A078I782|A0A078I782_BRANA BnaA03g17040D protein OS=Brassica napus GN=BnaA03g17040D PE=3 SV=1;tr|A0A078FJC0|A0A078FJC0_BRANA BnaA07g37750D protein OS=Brassica napus GN=BnaC06g14610D PE=3 SV=1;tr|A0A078CSQ1|A0A078CSQ1_BRANA BnaA09g33730D protein OS=Bras	17.968	166	4	63405000	101250000	96491000	8.70487e+07	662430000	161600000	161180000	3.28403e+08	536060000	351650000	241480000	3.76397e+08	209530000	20823000	1013900	77122300	126700000	158140000	113700000	1.32847e+08	161918000	188650000	173390000	1.74653e+08	13020000	1483400000	26507000	5.07642e+08	330090000	300970000	235890000	2.88983e+08
Q6LD03	CAM5	Calmodulin 5	tr|Q6LD03|Q6LD03_BRANA BnaA03g19320D protein OS=Brassica napus GN=bcm1 PE=2 SV=1;tr|A0A078JI54|A0A078JI54_BRANA BnaCnng45820D protein OS=Brassica napus GN=BnaCnng45820D PE=4 SV=1;tr|A0A078FUD5|A0A078FUD5_BRANA BnaA02g05320D protein OS=Brassica napus GN=Bna	16.819	149	3	195460000	78193000	66625000	113426000	78844000	140630000	237270000	152248000	93742000	267050000	456280000	2.72357e+08	150860000	141200000	117360000	1.36473e+08	69574000	0	0	2.31913e+07	64987000	49020000	118300000	7.74357e+07	0	0	17976000	5992000	12464000	14392000	49796000	2.55507e+07
A0A078HVI2	RPL18	Ribosomal protein L18	tr|A0A078HVI2|A0A078HVI2_BRANA BnaA08g03320D protein OS=Brassica napus GN=BnaA08g03320D PE=3 SV=1;tr|A0A078CK79|A0A078CK79_BRANA BnaC08g03600D protein OS=Brassica napus GN=BnaC08g03600D PE=3 SV=1;tr|A0A078D8U8|A0A078D8U8_BRANA BnaA02g02080D protein OS=Bras	18.722	171	1	0	0	0	0	0	0	0	0	0	0	0	0	0	0	0	0	0	0	0	0	0	0	0	0	0	18718000	0	6.23933e+06	0	0	0	0
A0A078H7Q2	KAS1	3-ketoacyl-acyl carrier protein synthase I	tr|A0A078H7Q2|A0A078H7Q2_BRANA BnaA06g36060D protein OS=Brassica napus GN=BnaA06g36060D PE=3 SV=1;tr|A0A078CKD1|A0A078CKD1_BRANA BnaC07g19000D protein OS=Brassica napus GN=BnaC07g19000D PE=3 SV=1;tr|A0A078HBM8|A0A078HBM8_BRANA BnaA09g17930D protein OS=Bras	49.68	469	5	236330000	79900000	17519000	1.1125e+08	302230000	340410000	8057600	216899200	10612000	11456000	15571000	1.25463e+07	18666000	357260000	209980000	195302000	14175000	200430000	452760000	222455000	320610000	436610000	1062500000	6.06573e+08	1162400	301670000	433630000	2.45487e+08	222370000	167110000	267760000	219080000
A0A078GKU2	At5g47190	50S ribosomal protein L19-2	tr|A0A078GKU2|A0A078GKU2_BRANA BnaC09g20060D protein OS=Brassica napus GN=BnaC09g20060D PE=4 SV=1;tr|A0A078HZZ6|A0A078HZZ6_BRANA BnaAnng07090D protein OS=Brassica napus GN=BnaAnng07090D PE=4 SV=1;tr|A0A078H4L9|A0A078H4L9_BRANA BnaA06g35530D protein OS=Bras	24.045	214	1	10811000	0	8862400	6557800	279040000	0	0	9.30133e+07	0	0	0	0	0	0	57932000	1.93107e+07	0	407340000	426070000	2.77803e+08	0	0	603310000	2.01103e+08	0	0	114780000	38260000	30694000	50796000	23453000	34981000
A0A078CKX4			tr|A0A078CKX4|A0A078CKX4_BRANA BnaC08g32700D protein OS=Brassica napus GN=BnaC08g32700D PE=4 SV=1	9.3633	90	1	27244000	0	11616000	1.29533e+07	26351000	75281000	40235000	47289000	3176200	5843000	5002000	4.67373e+06	11021000	68058000	81436000	53505000	7549400	0	33426000	1.36585e+07	0	0	0	0	0	47028000	15766000	2.09313e+07	4314000	0	0	1438000
A0A078K0L7	RPL18AA	60S ribosomal protein L18A-1	tr|A0A078K0L7|A0A078K0L7_BRANA BnaAnng37490D protein (Fragment) OS=Brassica napus GN=BnaAnng37490D PE=3 SV=1;tr|A0A078I0Q5|A0A078I0Q5_BRANA 60S ribosomal protein L18a OS=Brassica napus GN=BnaA04g20190D PE=3 SV=1;tr|A0A078E8S1|A0A078E8S1_BRANA 60S ribosomal	11.705	98	1	6409100	0	0	2.13637e+06	0	0	5729600	1.90987e+06	0	0	0	0	0	0	0	0	0	0	0	0	0	0	0	0	0	4596700	5237100	3.27793e+06	0	0	0	0
A0A078D7L2	CYN	Cyanate hydratase Cyanase	tr|A0A078D7L2|A0A078D7L2_BRANA Cyanate hydratase OS=Brassica napus GN=BnaC07g07990D PE=3 SV=1;tr|A0A078CLA5|A0A078CLA5_BRANA Cyanate hydratase OS=Brassica napus GN=BnaA07g06450D PE=3 SV=1	18.695	168	2	3342400	4344500	7403900	5.03027e+06	2720500	4473400	3234700	3476200	9070700	6160600	19049000	1.14268e+07	6100500	4246600	7337800	5.89497e+06	7727100	5879100	3475400	5.69387e+06	6424600	7905200	5425600	6.58513e+06	0	7058500	543160	2.53389e+06	11286000	12338000	13086000	1.22367e+07
A0A078HAQ8	CYP71B35	Cytochrome P450 71B35 (EC 1.14.-.-)	tr|A0A078HAQ8|A0A078HAQ8_BRANA BnaA09g41580D protein OS=Brassica napus GN=BnaA09g41580D PE=3 SV=1;tr|A0A078CLB5|A0A078CLB5_BRANA BnaC08g34150D protein OS=Brassica napus GN=BnaC08g34150D PE=3 SV=1	57.863	509	1	0	0	0	0	0	0	305390	101797	0	0	0	0	1855100	0	884320	913140	0	0	0	0	0	0	0	0	56564000	1538400	5321800	21141400	0	237930	0	79310
A0A078HBD2	At2g24020	Nucleoid-associated protein At2g24020(Suppressor of tic40 protein 2)	tr|A0A078HBD2|A0A078HBD2_BRANA BnaA09g41710D protein OS=Brassica napus GN=BnaA09g41710D PE=4 SV=1;tr|A0A078CLC9|A0A078CLC9_BRANA BnaC08g34300D protein OS=Brassica napus GN=BnaC08g34300D PE=4 SV=1	19.941	183	7	225180000	359600000	155430000	2.46737e+08	98615000	182050000	225930000	168865000	132530000	179520000	49616000	1.20555e+08	65447000	350120000	100880000	172149000	146300000	124980000	85071000	1.18784e+08	182130000	350060000	204430000	245540000	124870000	198220000	217260000	1.80117e+08	78433000	348840000	165270000	1.97514e+08
A0A078I001	LIL3.2	Light-harvesting complex-like protein 3 isotype 2(LHC-like protein 3 isoform 2)	tr|A0A078I001|A0A078I001_BRANA BnaAnng07140D protein OS=Brassica napus GN=BnaAnng07140D PE=4 SV=1;tr|A0A078CLF3|A0A078CLF3_BRANA BnaC07g19940D protein OS=Brassica napus GN=BnaC07g19940D PE=4 SV=1;tr|A0A078H7R4|A0A078H7R4_BRANA Casein kinase II subunit beta	28.908	262	2	11911000	13206000	22722000	1.59463e+07	4783800	30681000	0	11821600	0	0	0	0	0	0	20591000	6.86367e+06	0	0	0	0	10380000	8900800	15756000	1.16789e+07	4797400	60807000	29084000	31562800	20937000	0	16747000	1.25613e+07
A0A078GPA8	PSAF	Photosystem I reaction center subunit III(PSI-F)	tr|A0A078GPA8|A0A078GPA8_BRANA BnaA08g07940D protein OS=Brassica napus GN=BnaA08g07940D PE=4 SV=1;tr|A0A078FHE7|A0A078FHE7_BRANA BnaC08g09180D protein OS=Brassica napus GN=BnaC08g09180D PE=4 SV=1;tr|A0A078CLF9|A0A078CLF9_BRANA BnaA07g06900D protein OS=Bras	23.41	213	6	909130000	789570000	399360000	6.99353e+08	874310000	898630000	1182300000	985080000	274400000	932990000	196300000	4.67897e+08	2017400000	2791600000	1293500000	2.03417e+09	403330000	1102000000	973840000	826390000	992690000	941130000	826020000	9.19947e+08	2075600	1125600000	1458700000	862125200	372120000	698180000	653220000	5.74507e+08
A0A078HUE6	RPL7B	60S ribosomal protein L7-2	tr|A0A078HUE6|A0A078HUE6_BRANA BnaA02g27070D protein OS=Brassica napus GN=BnaA02g27070D PE=4 SV=1;tr|A0A078HKG8|A0A078HKG8_BRANA BnaC02g33760D protein OS=Brassica napus GN=BnaC02g33760D PE=4 SV=1;tr|A0A078CLL9|A0A078CLL9_BRANA BnaA06g35050D protein OS=Bras	27.944	242	3	196660000	456050000	84794000	2.45835e+08	29325000	123570000	109190000	8.73617e+07	0	608630000	459810000	3.56147e+08	0	0	0	0	27579000	0	0	9193000	5739800	35365000	7593500	1.62328e+07	5248700000	40721000	141120000	1.81018e+09	36254000	26387000	26439000	2.96933e+07
A0A078CPW9	RPL30B	60S ribosomal protein L30-2	tr|A0A078CPW9|A0A078CPW9_BRANA BnaA07g20750D protein OS=Brassica napus GN=BnaC06g20620D PE=3 SV=1;tr|A0A078CLN7|A0A078CLN7_BRANA BnaA01g26560D protein OS=Brassica napus GN=BnaC03g40660D PE=3 SV=1;tr|A0A078FQP8|A0A078FQP8_BRANA BnaC02g24700D protein OS=Bras	12.218	112	4	81978000	17653000	112610000	70747000	89829000	137010000	107980000	1.11606e+08	41113000	39197000	165560000	8.19567e+07	21475000	18684000	32170000	2.41097e+07	58887000	84159000	58846000	6.72973e+07	29126000	40876000	76835000	4.89457e+07	6908200	39914000	27448000	2.47567e+07	53897000	121020000	78655000	84524000
A0A078JWG5	ARP1	RNA-binding (RRM/RBD/RNP motifs) family protein	tr|A0A078JWG5|A0A078JWG5_BRANA BnaA06g35830D protein OS=Brassica napus GN=BnaCnng75520D PE=4 SV=1;tr|A0A078H9F5|A0A078H9F5_BRANA BnaA06g35850D protein OS=Brassica napus GN=BnaA06g35850D PE=4 SV=1;tr|A0A078FEZ6|A0A078FEZ6_BRANA BnaC02g29720D protein OS=Bras	35.639	313	2	4574200	0	0	1.52473e+06	70896000	16042000	8489800	3.18093e+07	14913000	1341400	974000	5742800	404590	2130900	0	845163	837550	4643100	0	1.82688e+06	0	0	0	0	0	7086800	1793900	2.96023e+06	0	0	0	0
A0A078CLT7	NodGS	Nodulin/glutamine synthase-like protein	tr|A0A078CLT7|A0A078CLT7_BRANA BnaA09g33460D protein OS=Brassica napus GN=BnaA09g33460D PE=3 SV=1	93.9	847	1	102740	0	0	34246.7	0	39000	0	13000	322710	143320	193720	219917	0	0	0	0	0	214300	0	71433.3	0	0	0	0	0	0	0	0	0	240340	252980	164440
A0A078CLX0	CXE13	Probable carboxylesterase 13	tr|A0A078CLX0|A0A078CLX0_BRANA BnaC03g52990D protein OS=Brassica napus GN=BnaC03g52990D PE=4 SV=1;tr|A0A078HJQ8|A0A078HJQ8_BRANA BnaA06g19010D protein OS=Brassica napus GN=BnaA06g19010D PE=4 SV=1;tr|A0A078HUL7|A0A078HUL7_BRANA BnaC05g14820D protein OS=Bras	34.337	312	2	1421300	4095200	3569600	3028700	879740	1286600	1624900	1.26375e+06	23264000	5498700	5302900	11355200	4411900	6811500	1632300	4.28523e+06	8172800	7405600	4066800	6548400	1619300	1193100	1899100	1570500	27225000	2078900	3975500	1.10931e+07	0	6089300	16284000	7.45777e+06
A0A078CMD4			tr|A0A078CMD4|A0A078CMD4_BRANA BnaA09g32300D protein OS=Brassica napus GN=BnaA09g32300D PE=4 SV=1	10.375	94	1	183290	0	0	61096.7	58640	49500	0	36046.7	4875700	4440400	4802900	4.70633e+06	0	0	0	0	1956000	1686800	0	1.21427e+06	0	0	0	0	0	0	0	0	0	0	0	0
A0A078CYV6	At5g10160	(3R)-hydroxymyristoyl-[acyl carrier protein] dehydratase-like protein	tr|A0A078CYV6|A0A078CYV6_BRANA BnaC03g04180D protein OS=Brassica napus GN=BnaC03g04180D PE=3 SV=1;tr|A0A078CME9|A0A078CME9_BRANA BnaA03g02830D protein OS=Brassica napus GN=BnaA03g02830D PE=3 SV=1	24.78	224	5	25572000	54276000	57796000	4.58813e+07	105020000	86309000	91908000	9.44123e+07	102150000	140940000	102540000	115210000	62229000	60629000	34707000	5.25217e+07	252040000	56467000	76382000	1.28296e+08	31255000	61055000	45823000	4.60443e+07	14621000	32302000	70823000	3.92487e+07	97562000	58630000	53193000	69795000
A0A078CMG3	PGDH1	D-3-phosphoglycerate dehydrogenase 1	tr|A0A078CMG3|A0A078CMG3_BRANA D-3-phosphoglycerate dehydrogenase OS=Brassica napus GN=BnaA08g11320D PE=3 SV=1;tr|A0A068FB16|A0A068FB16_BRANA D-3-phosphoglycerate dehydrogenase OS=Brassica napus GN=EDA9 PE=3 SV=1;tr|A0A078IH14|A0A078IH14_BRANA D-3-phosphog	63.085	600	6	53321000	28342000	29442000	37035000	5261600	18152000	36699000	2.00375e+07	14965000	28901000	44064000	29310000	20055000	26245000	14148000	2.01493e+07	0	12894000	6345900	6413300	84327000	94041000	104030000	9.41327e+07	1917100000	71966000	89259000	692775000	65692000	70690000	18707000	5.16963e+07
A0A078CMG6	DSP4	Phosphoglucan phosphatase DSP4	tr|A0A078CMG6|A0A078CMG6_BRANA BnaA09g32650D protein OS=Brassica napus GN=BnaA09g32650D PE=4 SV=1;tr|A0A078K0S5|A0A078K0S5_BRANA BnaAnng41430D protein (Fragment) OS=Brassica napus GN=BnaAnng41430D PE=4 SV=1;tr|A0A078CBS7|A0A078CBS7_BRANA BnaC08g23490D prot	42.634	377	4	0	0	9385800	3128600	0	14267000	0	4.75567e+06	2144800	0	12824000	4989600	12788000	18498000	0	1.04287e+07	3522500	23401000	187340000	7.14212e+07	0	14549000	0	4.84967e+06	0	0	15804000	5268000	14560000	12984000	8540700	1.20282e+07
A0A078FSL6	CAT2	Catalase (EC 1.11.1.6)	tr|A0A078FSL6|A0A078FSL6_BRANA Catalase OS=Brassica napus GN=BnaC03g65530D PE=3 SV=1;tr|A0A078CMJ6|A0A078CMJ6_BRANA Catalase OS=Brassica napus GN=BnaA08g10870D PE=3 SV=1	55.108	477	1	131770000	224140000	69391000	141767000	0	0	16308000	5436000	33340000	0	0	1.11133e+07	0	26432000	15631000	14021000	0	15842000	0	5.28067e+06	25201000	33724000	11417000	2.34473e+07	0	20539000	11648000	10729000	9866700	5867400	0	5244700
A0A078CMX2	FTSZ2-2	Cell division protein FtsZ homolog 2-2	tr|A0A078CMX2|A0A078CMX2_BRANA BnaA09g33170D protein OS=Brassica napus GN=BnaA09g33170D PE=3 SV=1;tr|A0A078C9T1|A0A078C9T1_BRANA BnaC08g23960D protein OS=Brassica napus GN=BnaC08g23960D PE=3 SV=1	49.224	464	3	1105400	792680	1107600	1.00189e+06	2174900	4698000	5722300	4198400	1701400	481320	0	727573	0	0	0	0	4453800	1174400	0	1.87607e+06	7961100	0	0	2653700	13208000	2182300	4170200	6.52017e+06	33913000	7674200	22205000	2.12641e+07
A0A078CW69	HEMC	Porphobilinogen deaminase	tr|A0A078CW69|A0A078CW69_BRANA BnaC03g03440D protein OS=Brassica napus GN=BnaC03g03440D PE=3 SV=1;tr|A0A078CN68|A0A078CN68_BRANA BnaA03g02420D protein OS=Brassica napus GN=BnaA03g02420D PE=3 SV=1;tr|A0A078I6K0|A0A078I6K0_BRANA BnaC02g01240D protein OS=Bras	40.75	378	2	2553700	2222600	3652500	2809600	44124000	64980000	60943000	5.66823e+07	1816600	1807700	929200	1.51783e+06	0	0	3685400	1.22847e+06	2385400	7873300	14030000	8.09623e+06	0	3404100	8040600	3814900	0	40631000	69007000	36546000	3347200	0	3251900	2199700
A0A078IAH0	YchF1	Obg-like ATPase 1 (Ribosome-binding ATPase YchF)	tr|A0A078IAH0|A0A078IAH0_BRANA Obg-like ATPase 1 OS=Brassica napus GN=BnaA08g05260D PE=3 SV=1;tr|A0A078FDK1|A0A078FDK1_BRANA Obg-like ATPase 1 OS=Brassica napus GN=BnaC08g09490D PE=3 SV=1;tr|A0A078EAK7|A0A078EAK7_BRANA Obg-like ATPase 1 OS=Brassica napus G	44.556	394	5	26589000	0	40948000	2.25123e+07	58001000	10211000	35970000	3.47273e+07	23580000	51250000	30047000	34959000	64473000	50128000	36714000	5.04383e+07	25697000	32997000	80129000	4.62743e+07	33380000	23005000	72160000	4.28483e+07	649890000	43660000	11314000	2.34955e+08	84660000	30705000	34409000	4.99247e+07
A0A0F6MY86	CHLI1	Magnesium-chelatase subunit ChlI-1(Mg-chelatase subunit I-1) (EC 6.6.1.1)	tr|A0A0F6MY86|A0A0F6MY86_BRANA Mg-protoporphyrin IX chelatase OS=Brassica napus GN=CH42.1 PE=2 SV=1;tr|A0A078J150|A0A078J150_BRANA Mg-protoporphyrin IX chelatase OS=Brassica napus GN=BnaA03g58320D PE=3 SV=1;tr|A0A078EBJ0|A0A078EBJ0_BRANA Mg-protoporphyrin	46.037	423	7	388770000	49290000	1185100000	5.41053e+08	265670000	590710000	1238100000	698160000	129140000	26941000	0	52027000	0	0	0	0	0	31889000	51752000	2.78803e+07	33751000	151440000	208980000	1.3139e+08	0	792780000	117430000	3.03403e+08	7963600	30450000	6743100	1.50522e+07
A0A078GVN3	SCPL51	Carboxypeptidase (EC 3.4.16.-)	tr|A0A078GVN3|A0A078GVN3_BRANA Carboxypeptidase OS=Brassica napus GN=BnaA04g16130D PE=3 SV=1;tr|A0A078CQ08|A0A078CQ08_BRANA Carboxypeptidase OS=Brassica napus GN=BnaC04g39380D PE=3 SV=1	51.125	453	1	0	3248300	0	1.08277e+06	5614600	5457200	1520000	4.19727e+06	14654000	4946200	4691800	8.09733e+06	0	0	20895000	6965000	0	21471000	0	7157000	22209000	0	0	7403000	84486000	0	5791000	3.00923e+07	3965000	0	3603100	2522700
A0A078EEE0	At4g18810	NAD(P)-binding Rossmann-fold superfamily protein	tr|A0A078EEE0|A0A078EEE0_BRANA BnaC01g11300D protein OS=Brassica napus GN=BnaC01g11300D PE=4 SV=1;tr|A0A078CQ99|A0A078CQ99_BRANA BnaA01g09640D protein OS=Brassica napus GN=BnaA01g09640D PE=4 SV=1	65.711	599	3	6734300	1469800	4602400	4.26883e+06	36657000	8678300	0	1.51118e+07	24705000	25445000	23391000	2.45137e+07	24586000	14351000	1963100	1.36334e+07	12726000	7792200	5796200	8.77147e+06	0	7835000	11175000	6.33667e+06	0	24676000	55821000	2.68323e+07	6443200	10042000	73115000	2.98667e+07
A0A078CQE5	LOX2	Lipoxygenase 2	tr|A0A078CQE5|A0A078CQE5_BRANA Lipoxygenase OS=Brassica napus GN=BnaC06g18870D PE=3 SV=1	103	904	6	55365000	12986000	58033000	42128000	115620000	129170000	169100000	1.37963e+08	3360200	6599700	0	3.31997e+06	107450000	7137900	394010000	1.69533e+08	0	477560000	45288000	1.74283e+08	26237000	85783000	36732000	49584000	0	120760000	44153000	54971000	82705000	31553000	153950000	8.94027e+07
A0A078D1C8	MPC3	Mitochondrial pyruvate carrier 3	tr|A0A078D1C8|A0A078D1C8_BRANA Mitochondrial pyruvate carrier OS=Brassica napus GN=BnaC01g13800D PE=3 SV=1;tr|A0A078EHC7|A0A078EHC7_BRANA Mitochondrial pyruvate carrier OS=Brassica napus GN=BnaA03g45280D PE=3 SV=1;tr|A0A078D0L8|A0A078D0L8_BRANA Mitochondri	11.117	99	1	0	0	0	0	5447200	5496400	6342500	5.76203e+06	0	0	0	0	0	7096700	0	2.36557e+06	0	3068100	0	1022700	0	3532000	0	1.17733e+06	0	0	0	0	0	4586300	17085000	7.22377e+06
A0A078CQP1	DHAD	Dihydroxy-acid dehydratase	tr|A0A078CQP1|A0A078CQP1_BRANA BnaA07g05810D protein OS=Brassica napus GN=BnaA07g05810D PE=3 SV=1	65.302	611	1	0	0	0	0	0	0	0	0	0	0	0	0	0	0	0	0	0	0	0	0	0	0	0	0	0	2526700	0	842233	0	0	0	0
A0A078E092	At3g24170	Glutathione reductase	tr|A0A078E092|A0A078E092_BRANA BnaA03g37200D protein OS=Brassica napus GN=BnaA03g37200D PE=3 SV=1;tr|A0A078D7P2|A0A078D7P2_BRANA BnaC07g07510D protein OS=Brassica napus GN=BnaC07g07510D PE=3 SV=1;tr|A0A078CQQ6|A0A078CQQ6_BRANA BnaA07g06010D protein OS=Bras	52.391	484	2	0	3760000	4357100	2705700	0	0	0	0	1970200	0	28470000	1.01467e+07	18912000	11881000	2450200	1.10811e+07	7291800	6626200	20024000	11314000	18842000	0	0	6.28067e+06	0	0	13293000	4431000	6040700	7937400	0	4.65937e+06
A0A078CQS6	PSBQ1	Oxygen-evolving enhancer protein 3-1	tr|A0A078CQS6|A0A078CQS6_BRANA BnaA01g11190D protein OS=Brassica napus GN=BnaA01g11190D PE=4 SV=1	24.347	227	1	344890000	0	100870000	1.48587e+08	181920000	534830000	539150000	4.18633e+08	148760000	240880000	155090000	1.81577e+08	74224000	215160000	112980000	1.34121e+08	158350000	0	590250000	2.49533e+08	0	0	0	0	1155600	289790000	182750000	1.57899e+08	118160000	126700000	155770000	1.33543e+08
A0A078EBY3	PRIP	Putative receptor-interacting protein	tr|A0A078EBY3|A0A078EBY3_BRANA BnaA03g44710D protein OS=Brassica napus GN=BnaA03g44710D PE=4 SV=1;tr|A0A078E3L9|A0A078E3L9_BRANA BnaC07g36720D protein OS=Brassica napus GN=BnaC07g36720D PE=4 SV=1;tr|A0A078D3J1|A0A078D3J1_BRANA BnaC01g12740D protein OS=Bras	17.047	152	2	84964000	129900000	176770000	1.30545e+08	81489000	82585000	46695000	7.02563e+07	217350000	178740000	434330000	2.76807e+08	72860000	44613000	113850000	7.71077e+07	453030000	106830000	67670000	2.09177e+08	0	0	0	0	0	22363000	34873000	1.90787e+07	0	19939000	0	6.64633e+06
A0A078D740	At2g26230	Uricase	tr|A0A078D740|A0A078D740_BRANA Uricase OS=Brassica napus GN=BnaC07g08000D PE=3 SV=1;tr|A0A078CQV7|A0A078CQV7_BRANA Uricase OS=Brassica napus GN=BnaA07g06460D PE=3 SV=1	34.62	307	2	4070200	0	0	1.35673e+06	0	0	0	0	0	0	1552800	517600	774130	618820	3509400	1.63412e+06	0	0	0	0	0	0	683460	227820	0	782630	924650	569093	22680000	32008000	20372000	25020000
A0A078FUH8	APR1	5'-adenylylsulfate reductase 1	tr|A0A078FUH8|A0A078FUH8_BRANA BnaA09g20370D protein OS=Brassica napus GN=BnaA09g20370D PE=4 SV=1;tr|A0A078DYZ9|A0A078DYZ9_BRANA BnaC09g22760D protein OS=Brassica napus GN=BnaC09g22760D PE=4 SV=1;tr|A0A078DYV1|A0A078DYV1_BRANA BnaC07g37060D protein OS=Bras	50.731	457	1	0	0	0	0	0	0	0	0	0	0	0	0	0	0	0	0	0	0	0	0	0	0	0	0	55145000	0	0	1.83817e+07	0	0	29092000	9.69733e+06
A0A078CQZ8	PAP6	Plastid-lipid-associated protein 6	tr|A0A078CQZ8|A0A078CQZ8_BRANA BnaA07g06560D protein OS=Brassica napus GN=BnaA07g06560D PE=4 SV=1	29.879	277	2	12055000	23560000	15267000	1.69607e+07	3632300	7207500	0	3.61327e+06	55954000	0	0	1.86513e+07	79788000	41867000	25851000	4.91687e+07	152830000	102030000	39173000	98011000	1855600	2723600	2806600	2.46193e+06	0	6333100	0	2.11103e+06	42251000	51569000	41713000	4.51777e+07
A0A078IA62	MED37F	Mediator of RNA polymerase II transcription subunit 37f (Heat shock 70 kDa protein 12)	tr|A0A078IA62|A0A078IA62_BRANA BnaA03g17100D protein OS=Brassica napus GN=BnaA03g17100D PE=3 SV=1;tr|A0A078D911|A0A078D911_BRANA BnaA03g14210D protein OS=Brassica napus GN=BnaA03g14210D PE=3 SV=1;tr|A0A078CRD6|A0A078CRD6_BRANA BnaC03g20620D protein OS=Bras	70.506	642	7	248570000	112700000	177970000	1.79747e+08	331030000	239240000	104640000	224970000	21553000	88779000	57930000	5.60873e+07	83537000	77468000	200100000	1.20368e+08	121240000	229620000	417420000	2.56093e+08	150750000	101500000	37017000	9.64223e+07	16441000	73293000	220030000	1.03255e+08	80420000	91476000	49009000	73635000
A0A078CRW1	CBBY	CBBY-like protein AtCbby	tr|A0A078CRW1|A0A078CRW1_BRANA BnaC03g53110D protein OS=Brassica napus GN=BnaC03g53110D PE=4 SV=1	34.195	320	2	0	0	0	0	0	0	0	0	0	0	0	0	17062000	0	0	5.68733e+06	20373000	0	1960800	7444600	14330000	14694000	0	9.67467e+06	0	4402200	0	1467400	17960000	5899400	4950300	9.60323e+06
A0A078CRW2	PAP13	Probable plastid-lipid-associated protein 13	tr|A0A078CRW2|A0A078CRW2_BRANA BnaA05g02650D protein OS=Brassica napus GN=BnaA05g02650D PE=4 SV=1;tr|A0A078JH64|A0A078JH64_BRANA BnaC04g52490D protein OS=Brassica napus GN=BnaC04g52490D PE=4 SV=1	33.288	303	2	29462000	18712000	64280000	3.74847e+07	37874000	4978600	0	14284200	0	32471000	11111000	1.45273e+07	0	38311000	0	1.27703e+07	3792300	51890000	24467000	2.67164e+07	44779000	0	46890000	3.05563e+07	0	0	0	0	0	38153000	0	1.27177e+07
A0A078FWX6	Lhb1B1	Chlorophyll a-b binding protein	tr|A0A078FWX6|A0A078FWX6_BRANA Chlorophyll a-b binding protein, chloroplastic OS=Brassica napus GN=BnaA05g09410D PE=3 SV=1;tr|A0A078D660|A0A078D660_BRANA Chlorophyll a-b binding protein, chloroplastic OS=Brassica napus GN=BnaA03g15830D PE=3 SV=1;tr|A0A078D	28.168	266	2	46410000	30095000	41385000	3.92967e+07	201580000	257650000	20345000	1.59858e+08	28916000	112790000	96587000	79431000	278750000	249850000	126420000	218340000	621460000	45768000	23293000	2.30174e+08	306080000	0	0	1.02027e+08	2365800000	119200000	146300000	877100000	829440000	599630000	838090000	755720000
A0A078I788	At2g37230	Pentatricopeptide repeat-containing protein At2g37230	tr|A0A078I788|A0A078I788_BRANA BnaA03g17090D protein OS=Brassica napus GN=BnaA03g17090D PE=4 SV=1;tr|A0A078CSC1|A0A078CSC1_BRANA BnaC03g20610D protein OS=Brassica napus GN=BnaC03g20610D PE=4 SV=1	84.97	751	1	0	0	0	0	0	261710000	0	8.72367e+07	0	0	0	0	0	0	0	0	0	0	0	0	0	0	0	0	0	0	0	0	0	0	0	0
A0A078J0K8	CP12-1	Calvin cycle protein CP12-1(CP12 domain-containing protein 1)	tr|A0A078J0K8|A0A078J0K8_BRANA BnaC04g51970D protein OS=Brassica napus GN=BnaC04g51970D PE=4 SV=1;tr|A0A078E8K5|A0A078E8K5_BRANA BnaC03g26040D protein OS=Brassica napus GN=BnaC03g26040D PE=4 SV=1;tr|A0A078D4U1|A0A078D4U1_BRANA BnaA03g21770D protein OS=Bras	13.7	126	3	56932000	78581000	108690000	81401000	55961000	61803000	43992000	5.39187e+07	220340000	158380000	102990000	160570000	53126000	46055000	31506000	4.35623e+07	132280000	87744000	63435000	9.44863e+07	12484000	10214000	23294000	1.53307e+07	0	25223000	16656000	1.39597e+07	24110000	21853000	16764000	20909000
A0A078GY66	HOL2	Probable thiol methyltransferase 1 (EC 2.1.1.9)	tr|A0A078GY66|A0A078GY66_BRANA BnaA04g25470D protein OS=Brassica napus GN=BnaA04g25470D PE=4 SV=1;tr|A0A078GFK8|A0A078GFK8_BRANA BnaC04g49360D protein OS=Brassica napus GN=BnaC04g49360D PE=4 SV=1;tr|A0A078FY06|A0A078FY06_BRANA BnaC04g03180D protein OS=Bras	25.186	226	1	1884400	11151000	6125700	6.38703e+06	0	2143900	1777800	1.30723e+06	12101000	4587300	7762600	8150300	0	0	0	0	4748200	2939400	4409600	4032400	363530	263860	486290	371227	0	776990	848390	541793	1036500	983870	1032800	1.01772e+06
A0A078CSL6	PRXIIE	Peroxiredoxin-2E	tr|A0A078CSL6|A0A078CSL6_BRANA BnaA09g33330D protein OS=Brassica napus GN=BnaA09g33330D PE=4 SV=1;tr|A0A078JQA5|A0A078JQA5_BRANA BnaCnng59880D protein OS=Brassica napus GN=BnaCnng59880D PE=4 SV=1	24.07	230	1	0	15902000	0	5.30067e+06	6390500	0	0	2.13017e+06	11726000	0	2689500	4.80517e+06	9381000	0	0	3127000	0	4099400	0	1.36647e+06	0	0	0	0	0	0	0	0	0	8016000	0	2672000
A0A078HYR8	PRS1	Ribose-phosphate pyrophosphokinase 1(EC 2.7.6.1)	tr|A0A078HYR8|A0A078HYR8_BRANA BnaC03g23950D protein OS=Brassica napus GN=BnaC03g23950D PE=4 SV=1;tr|A0A078J6F4|A0A078J6F4_BRANA BnaCnng35810D protein OS=Brassica napus GN=BnaCnng35810D PE=4 SV=1;tr|A0A078D2C4|A0A078D2C4_BRANA BnaA03g19950D protein OS=Bras	34.572	309	1	967000	1546300	1938400	1483940	0	5359000	0	1.78633e+06	0	0	0	0	2538500	0	0	846167	0	0	5789100	1929700	0	6420100	6060600	4.16023e+06	18062000	0	0	6.02067e+06	28236000	0	39550000	2.25953e+07
A0A078FYK6	At2g43945	Uncharacterized protein	tr|A0A078FYK6|A0A078FYK6_BRANA BnaC04g03220D protein OS=Brassica napus GN=BnaC04g03220D PE=4 SV=1;tr|A0A078CSR8|A0A078CSR8_BRANA BnaA05g03640D protein OS=Brassica napus GN=BnaA05g03640D PE=4 SV=1;tr|A0A078D2U4|A0A078D2U4_BRANA BnaA03g20540D protein OS=Bras	31.278	283	2	3484200	20083000	32656000	1.87411e+07	5871000	7684500	77988000	30514500	48959000	3202900	0	17387300	24903000	43563000	18225000	28897000	164060000	47909000	0	7.06563e+07	0	0	0	0	577050000	0	18905000	1.98652e+08	21639000	39481000	48592000	3.65707e+07
A0A078H1E0	ADF3	Actin depolymerizing factor 3	tr|A0A078H1E0|A0A078H1E0_BRANA BnaA10g12850D protein OS=Brassica napus GN=BnaA10g12850D PE=3 SV=1;tr|A0A078CSS3|A0A078CSS3_BRANA BnaC09g35260D protein OS=Brassica napus GN=BnaC09g35260D PE=3 SV=1	15.267	132	2	0	0	7713300	2571100	5726600	3385000	5609200	4.90693e+06	0	0	3504600	1168200	0	0	0	0	6386600	20245000	0	8877200	55244000	38160000	35329000	42911000	683470000	3352800	4224500	230349100	0	6985900	14606000	7197300
A0A078D0F0	MSRB2	Peptide methionine sulfoxide reductase B2	tr|A0A078D0F0|A0A078D0F0_BRANA BnaC01g13210D protein OS=Brassica napus GN=BnaC01g13210D PE=4 SV=1;tr|A0A078CSV8|A0A078CSV8_BRANA BnaA01g11660D protein OS=Brassica napus GN=BnaA01g11660D PE=4 SV=1	21.532	200	3	10442000	8737100	14785000	1.13214e+07	2955500	26634000	19714000	16434500	27377000	30447000	35969000	3.12643e+07	24655000	15043000	5838900	1.5179e+07	32334000	40580000	33302000	3.54053e+07	14475000	10921000	12745000	1.27137e+07	259150000	15756000	14258000	96388000	14830000	13521000	14935000	1.44287e+07
A0A078CSV9	At3g54400	Eukaryotic aspartyl protease family protein	tr|A0A078CSV9|A0A078CSV9_BRANA BnaA09g34280D protein OS=Brassica napus GN=BnaA09g34280D PE=3 SV=1;tr|A0A078K0T5|A0A078K0T5_BRANA BnaCnng73250D protein (Fragment) OS=Brassica napus GN=BnaCnng73250D PE=3 SV=1	46.096	430	3	64037000	93942000	118230000	9.20697e+07	45041000	34897000	47624000	4.25207e+07	534930000	622490000	863470000	673630000	5223400	3047300	22777000	1.03492e+07	108630000	101720000	46167000	8.55057e+07	2644200	1715100	0	1453100	0	774450	3639500	1.47132e+06	6978400	6745400	10978000	8.23393e+06
A0A078CT08	At4g22670	FAM10 family protein	tr|A0A078CT08|A0A078CT08_BRANA BnaA01g12360D protein OS=Brassica napus GN=BnaA01g12360D PE=4 SV=1;tr|A0A078JXL0|A0A078JXL0_BRANA BnaCnng72890D protein (Fragment) OS=Brassica napus GN=BnaCnng72890D PE=4 SV=1;tr|A0A078D1F9|A0A078D1F9_BRANA BnaC01g14070D prot	43.041	399	2	345500	0	0	115183	0	0	0	0	0	0	0	0	0	0	0	0	0	0	0	0	239960	0	0	79986.7	0	1666600	416760	694453	0	310660	0	103553
A0A078CT10	Ag2g40660	Nucleic acid-binding	tr|A0A078CT10|A0A078CT10_BRANA BnaA05g01810D protein OS=Brassica napus GN=BnaA05g01810D PE=4 SV=1;tr|A0A078GGW5|A0A078GGW5_BRANA BnaC04g01490D protein OS=Brassica napus GN=BnaC04g01490D PE=4 SV=1	41	382	1	808300	1769100	2094900	1557450	113470	1732000	1316700	1.05406e+06	2641800	2338100	2552100	2.51067e+06	2073300	1238800	822080	1378060	3122400	2043900	0	1722100	916400	969060	1027500	970987	0	1036800	1313300	783367	3959700	2613600	4422000	3665100
A0A078HSE9	SCS	Succinyl-CoA synthetase (EC 6.2.1.5)	tr|A0A078HSE9|A0A078HSE9_BRANA Succinate--CoA ligase [ADP-forming] subunit alpha, mitochondrial OS=Brassica napus GN=BnaAnng06200D PE=3 SV=1;tr|A0A078I5L9|A0A078I5L9_BRANA Succinate--CoA ligase [ADP-forming] subunit alpha, mitochondrial OS=Brassica napus G	35.682	342	2	43111000	90265000	82238000	7.18717e+07	13822000	28940000	26366500	2.30428e+07	21002000	24889300	24719000	2.35368e+07	8290000	11092000	7829000	9.07033e+06	33279000	31883000	18983000	2.80483e+07	8810000	8637000	9100000	8849000	51992800	42771600	45112700	46625700	11030000	9993000	12003000	1.10087e+07
A0A078GFG5	DPE2	4-alpha-glucanotransferase DPE2 (EC 2.4.1.25)	tr|A0A078GFG5|A0A078GFG5_BRANA BnaC04g01600D protein OS=Brassica napus GN=BnaC04g01600D PE=4 SV=1;tr|A0A078CT73|A0A078CT73_BRANA BnaA05g01890D protein OS=Brassica napus GN=BnaA05g01890D PE=4 SV=1	108.07	941	3	14456000	0	44142000	1.95327e+07	10510000	0	41334000	1.72813e+07	0	55477000	0	1.84923e+07	0	0	0	0	0	4837000	0	1.61233e+06	26013000	8566400	0	1.15265e+07	0	0	0	0	16360000	32377000	28961000	2.58993e+07
A0A078J0V4	GEP	Probable glutamyl endopeptidase(EC 3.4.21.-)	tr|A0A078J0V4|A0A078J0V4_BRANA BnaC04g51960D protein OS=Brassica napus GN=BnaC04g51960D PE=4 SV=1;tr|A0A078CTF6|A0A078CTF6_BRANA BnaA05g00560D protein OS=Brassica napus GN=BnaA05g00560D PE=4 SV=1;tr|A0A078GQP1|A0A078GQP1_BRANA BnaC04g51330D protein OS=Bras	104.23	939	3	7817100	13382000	6954600	9.38457e+06	18247000	3365500	23304000	1.49722e+07	0	7077600	0	2359200	24029000	8330300	0	1.07864e+07	6125600	41599000	0	15908200	17099000	0	14941000	10680000	714800000	0	11673000	2.42158e+08	22686000	28360000	60998000	37348000
A0A078CTJ6	PAP10	Probable plastid-lipid-associated protein 10	tr|A0A078CTJ6|A0A078CTJ6_BRANA BnaA05g00990D protein OS=Brassica napus GN=BnaA05g00990D PE=4 SV=1;tr|A0A078HV35|A0A078HV35_BRANA BnaC04g00560D protein OS=Brassica napus GN=BnaC04g00560D PE=4 SV=1	31.537	283	2	32551000	0	42193000	2.49147e+07	0	6701700	3034300	3.24533e+06	16225000	31388000	23515000	2.37093e+07	0	34376000	19171000	17849000	0	13928000	9585600	7.83787e+06	0	8988700	9295600	6.09477e+06	0	13198000	10383000	7.86033e+06	43453000	24500000	19862000	2.92717e+07
A0A078GQ98	FUM1	Fumarate hydratase 1(Fumarase 1) (EC 4.2.1.2)	tr|A0A078GQ98|A0A078GQ98_BRANA BnaC04g51220D protein OS=Brassica napus GN=BnaC04g51220D PE=3 SV=1;tr|A0A078CTP4|A0A078CTP4_BRANA BnaA05g00440D protein OS=Brassica napus GN=BnaA05g00440D PE=3 SV=1	52.476	487	1	431400	540100	759900	577193	0	158090	0	52696.7	626610	0	0	208870	515730	401720	0	305817	502330	645390	0	382573	321120	0	257920	193013	0	0	0	0	617220	725930	763250	702133
A0A078CTQ2	At5g25460		tr|A0A078CTQ2|A0A078CTQ2_BRANA BnaA06g27710D protein OS=Brassica napus GN=BnaC07g29330D PE=4 SV=1;tr|A0A078CTQ5|A0A078CTQ5_BRANA BnaC07g29280D protein OS=Brassica napus GN=BnaC07g29280D PE=4 SV=1;tr|A0A078IXL3|A0A078IXL3_BRANA BnaC02g48660D protein OS=Bras	39.671	367	3	29839000	10298000	18394000	1.95103e+07	0	1895800	51533000	17809600	673660000	0	63564000	2.45741e+08	13017000	75533000	29662000	39404000	0	3228900	0	1076300	11299000	47590000	4950200	2.12797e+07	89907000	18047000	51607000	53187000	84591000	156740000	9596000	8.36423e+07
A0A078CTS9	At5g13360	Auxin-responsive GH3 family protein	tr|A0A078CTS9|A0A078CTS9_BRANA BnaA03g04300D protein OS=Brassica napus GN=BnaA03g04300D PE=4 SV=1;tr|A0A078C2P5|A0A078C2P5_BRANA BnaC03g05830D protein OS=Brassica napus GN=BnaC03g05830D PE=4 SV=1	67.781	607	2	2290800	8386300	0	3.55903e+06	11253000	8284200	9649200	9728800	0	0	2012800	670933	0	0	0	0	0	12950000	15437000	9.46233e+06	0	6754400	7321000	4691800	15031000	5054600	7623400	9.23633e+06	0	0	3099600	1033200
A0A078GEI3	ATPC	ATP synthase subunit gamma(F-ATPase gamma subunit)	tr|A0A078GEI3|A0A078GEI3_BRANA BnaC04g43510D protein OS=Brassica napus GN=BnaC04g43510D PE=3 SV=1;tr|A0A078G407|A0A078G407_BRANA BnaC04g11660D protein OS=Brassica napus GN=BnaC04g11660D PE=3 SV=1;tr|A0A078FRL5|A0A078FRL5_BRANA BnaA05g10580D protein OS=Bras	35.047	321	5	7749400	8395900	24855000	1.36668e+07	45719000	58526000	42532000	4.89257e+07	2338400	0	2600300	1.64623e+06	54451000	43582000	21186000	3.97397e+07	62732000	46568000	28467000	4.59223e+07	16983000	31378000	76956000	4.17723e+07	70713000	22112000	56448000	4.97577e+07	72168000	87152000	99163000	86161000
A0A078CU15	RPS9B	40S ribosomal protein S9-1	tr|A0A078CU15|A0A078CU15_BRANA BnaA02g02540D protein OS=Brassica napus GN=BnaA03g05300D PE=3 SV=1	22.934	197	2	107370000	11859000	46018000	5.50823e+07	139790000	87075000	69495000	9.87867e+07	31402000	53079000	31251000	3.85773e+07	5874100	28257000	0	1.1377e+07	7478700	57986000	84307000	49923900	248540000	250060000	0	166200000	4124200	206370000	87398000	99297400	67900000	39895000	88869000	6.55547e+07
A0A078CU51	At2g33435	RNA-binding (RRM/RBD/RNP motifs) family protein	tr|A0A078CU51|A0A078CU51_BRANA BnaC03g18650D protein OS=Brassica napus GN=BnaC03g18650D PE=4 SV=1;tr|A0A078HK87|A0A078HK87_BRANA BnaA04g19490D protein OS=Brassica napus GN=BnaA04g19490D PE=4 SV=1;tr|A0A078GEH7|A0A078GEH7_BRANA BnaC04g43880D protein OS=Bras	14.17	121	2	3148100	3172000	3580800	3300300	4113800	12457000	5355000	7308600	5632600	4760200	5168100	5.18697e+06	0	0	0	0	0	0	7751400	2583800	0	0	0	0	0	0	0	0	3800000	3551500	0	2450500
A0A078IW00	F13I12.120	Thylakoid soluble phosphoprotein	tr|A0A078IW00|A0A078IW00_BRANA BnaA10g29120D protein OS=Brassica napus GN=BnaA10g29120D PE=4 SV=1;tr|A0A078CU76|A0A078CU76_BRANA BnaC09g34100D protein OS=Brassica napus GN=BnaC09g34100D PE=4 SV=1	10.537	101	3	16898000	13353000	50899000	27050000	5767700	35443000	309760000	1.1699e+08	2116200	3742900	1964500	2.60787e+06	10848000	9692800	12334000	1.09583e+07	22261000	19462000	1265900	1.43296e+07	44860000	89816000	0	44892000	888860000	4174500	111550000	334861500	15184000	8095200	4660300	9.31317e+06
A0A078CUD8	UGP2	UTP-glucose-1-phosphate uridylyltransferase 2	tr|A0A078CUD8|A0A078CUD8_BRANA BnaA03g06500D protein OS=Brassica napus GN=BnaA03g06500D PE=4 SV=1;tr|A0A078C1F6|A0A078C1F6_BRANA BnaC03g08340D protein OS=Brassica napus GN=BnaC03g08340D PE=4 SV=1	51.787	470	1	32110000	0	16921000	1.63437e+07	21795000	6401600	0	9.39887e+06	41047000	46302000	33468000	4.02723e+07	58973000	0	27471000	2.88147e+07	38518000	0	0	1.28393e+07	0	0	0	0	920610	0	0	306870	0	0	17159000	5.71967e+06
A0A078D646	ENO2	Bifunctional enolase 2/transcriptional activator	tr|A0A078D646|A0A078D646_BRANA BnaA03g16750D protein OS=Brassica napus GN=BnaA03g16750D PE=3 SV=1;tr|A0A078CUK1|A0A078CUK1_BRANA BnaC03g20200D protein OS=Brassica napus GN=BnaC03g20200D PE=3 SV=1	46.022	429	1	0	102770000	184960000	95910000	30385000	70857000	32976000	4.47393e+07	219500000	173410000	0	130970000	55555000	59311000	76085000	6.36503e+07	275630000	173900000	56729000	168753000	0	0	0	0	0	0	0	0	0	0	0	0
A0A078IBN1	CP29B	RNA-binding protein CP29B	tr|A0A078IBN1|A0A078IBN1_BRANA BnaA03g17080D protein OS=Brassica napus GN=BnaA03g17080D PE=4 SV=1;tr|A0A078CUM7|A0A078CUM7_BRANA BnaC03g20600D protein OS=Brassica napus GN=BnaC03g20600D PE=4 SV=1	31.095	291	1	423430000	677570000	0	367000000	919230000	0	627720000	515650000	1445700000	1551800000	1798000000	1598500000	654910000	103030000	242930000	3.33623e+08	1841800000	0	710830000	8.50877e+08	96845000	73125000	139740000	1.03237e+08	2806900	0	542300000	181702300	0	82508000	120450000	6.76527e+07
A0A078ESH8	RPS28C	40S ribosomal protein S28-2	tr|A0A078ESH8|A0A078ESH8_BRANA BnaA09g06730D protein OS=Brassica napus GN=BnaAnng00820D PE=3 SV=1;tr|A0A078CUQ3|A0A078CUQ3_BRANA BnaA03g01080D protein OS=Brassica napus GN=BnaC03g01450D PE=3 SV=1;tr|A0A078D1J6|A0A078D1J6_BRANA BnaC09g06240D protein OS=Bras	7.3545	64	1	0	0	0	0	0	30363000	682130000	2.37498e+08	0	998410000	53263000	3.50558e+08	0	0	0	0	423030000	0	0	141010000	0	0	0	0	0	0	0	0	150980000	255260000	376860000	2.61033e+08
A0A078FZ01	RPS17B	40S ribosomal protein S17-2	tr|A0A078FZ01|A0A078FZ01_BRANA BnaA04g26860D protein OS=Brassica napus GN=BnaA05g19730D PE=3 SV=1;tr|A0A078FED6|A0A078FED6_BRANA BnaA03g01450D protein OS=Brassica napus GN=BnaA03g01450D PE=3 SV=1;tr|A0A078I6W6|A0A078I6W6_BRANA BnaA10g25520D protein OS=Bras	13.326	113	3	37533000	37635000	49160000	4.14427e+07	151630000	196320000	157020000	1.68323e+08	154560000	124810000	175410000	1.51593e+08	4905300	20655000	7214100	10924800	6094200	42141000	70219000	3.94847e+07	22417000	19332000	44323000	2.86907e+07	0	301340000	173620000	158320000	30115000	28141000	13046000	2.37673e+07
A0A078FXM1	OASB	Cysteine synthase/chromoplastic (EC 2.5.1.47)	tr|A0A078FXM1|A0A078FXM1_BRANA Cysteine synthase OS=Brassica napus GN=BnaC04g03050D PE=3 SV=1;tr|A0A078CUU9|A0A078CUU9_BRANA Cysteine synthase OS=Brassica napus GN=BnaA05g03520D PE=3 SV=1	41.617	392	3	142990000	576340000	354930000	3.58087e+08	196880000	80120000	105500000	127500000	147680000	47214000	85527000	9.34737e+07	192870000	126040000	80203000	1.33038e+08	143750000	183140000	236710000	1.87867e+08	36999000	176120000	0	7.10397e+07	0	52980000	72326000	4.17687e+07	152040000	20484000	145840000	1.06121e+08
A0A078EH61	TUFA	Elongation factor Tu	tr|A0A078EH61|A0A078EH61_BRANA BnaA03g44530D protein OS=Brassica napus GN=BnaA03g44530D PE=4 SV=1;tr|A0A078DYL9|A0A078DYL9_BRANA BnaC07g36360D protein OS=Brassica napus GN=BnaC07g36360D PE=4 SV=1;tr|A0A078D687|A0A078D687_BRANA BnaC01g12080D protein OS=Bras	30.217	277	3	3360600000	3039300000	10182000000	5527300000	1384100000	296570000	468180000	7.16283e+08	566020000	351050000	502430000	4.73167e+08	292560000	2506100000	2004000000	1.60089e+09	639090000	142220000	0	2.60437e+08	1507400000	327370000	1390300000	1.07502e+09	3310000000	1811900000	1459600000	2.19383e+09	1600200000	1774000000	173310000	1.1825e+09
A0A078HA64	CEQORH	Chloroplast envelope quinone oxidoreductase homolog (ceQORH) (EC 1.3.1.-)	tr|A0A078HA64|A0A078HA64_BRANA BnaA08g04920D protein OS=Brassica napus GN=BnaA08g04920D PE=4 SV=1;tr|A0A078CV36|A0A078CV36_BRANA BnaC08g05290D protein OS=Brassica napus GN=BnaC08g05290D PE=4 SV=1	34.626	329	1	0	0	0	0	0	0	0	0	0	0	0	0	1255500	0	0	418500	0	950730	1373700	774810	890650	1423700	1003800	1106050	0	0	2853800	951267	10922000	8614400	0	6.51213e+06
Q96540	FER1	Ferritin-1(AtFer1) (EC 1.16.3.1)	sp|Q96540|FRI1_BRANA Ferritin-1, chloroplastic OS=Brassica napus GN=LSC30 PE=2 SV=1;tr|A0A078F9R8|A0A078F9R8_BRANA Ferritin OS=Brassica napus GN=BnaA03g00260D PE=3 SV=1;tr|A0A078CVI2|A0A078CVI2_BRANA Ferritin OS=Brassica napus GN=BnaC03g00160D PE=3 SV=1	28.168	254	5	100510000	1321300	16827000	3.95528e+07	29123000	79613000	79634000	62790000	79807000	28094000	100060000	6.93203e+07	0	0	0	0	53385000	48594000	106300000	6.94263e+07	0	6987700	15008000	7331900	0	86227000	36734000	40987000	59255000	120220000	87971000	8.91487e+07
Q85WB7	GSA1	Glutamate-1-semialdehyde-2,1-aminomutase	sp|Q85WB7|GSA_BRANA Glutamate-1-semialdehyde 2,1-aminomutase, chloroplastic OS=Brassica napus GN=GSA PE=2 SV=1;tr|Q84TK5|Q84TK5_BRANA BnaA09g06670D protein OS=Brassica napus GN=Gsa PE=2 SV=1;tr|A0A078JB53|A0A078JB53_BRANA BnaC03g74650D protein OS=Brassica	50.251	473	7	166280000	94938000	108530000	1.23249e+08	171200000	341510000	446850000	3.19853e+08	37059000	47134000	21325000	3.51727e+07	103000000	122520000	206590000	1.44037e+08	260320000	129490000	46482000	1.45431e+08	251700000	177000000	110900000	1.79867e+08	69357000	262580000	208880000	1.80272e+08	83940000	96503000	99120000	9.31877e+07
A0A078HUC8	RPL4A	60S ribosomal protein L4-1 (L1)	tr|A0A078HUC8|A0A078HUC8_BRANA BnaA01g32180D protein OS=Brassica napus GN=BnaA01g32180D PE=4 SV=1;tr|A0A078GAV9|A0A078GAV9_BRANA BnaC01g39090D protein OS=Brassica napus GN=BnaC01g39090D PE=4 SV=1;tr|A0A078HV61|A0A078HV61_BRANA BnaC05g43330D protein OS=Bras	43.065	391	2	0	0	0	0	0	0	0	0	0	0	0	0	0	0	0	0	0	0	0	0	0	0	0	0	0	0	0	0	0	0	0	0
A0A078CVS8	RPS23B	40S ribosomal protein S23-2 (S12)	tr|A0A078CVS8|A0A078CVS8_BRANA BnaA03g00720D protein OS=Brassica napus GN=BnaC03g01010D PE=3 SV=1;tr|A0A078FE74|A0A078FE74_BRANA BnaCnng03140D protein OS=Brassica napus GN=BnaCnng03140D PE=4 SV=1;tr|A0A078HVB5|A0A078HVB5_BRANA BnaA01g32150D protein OS=Bras	15.12	136	1	39767000	0	0	1.32557e+07	84879000	4186300	11430000	3.34984e+07	29794000	0	0	9.93133e+06	0	0	0	0	0	0	0	0	7487900	0	31398000	1.2962e+07	0	72866000	139910000	7.09253e+07	30412000	0	52526000	27646000
A0A078CVT8	PMEI6	Pectinesterase inhibitor 6	tr|A0A078CVT8|A0A078CVT8_BRANA BnaA05g00320D protein OS=Brassica napus GN=BnaA05g00320D PE=4 SV=1	23.311	206	1	0	0	0	0	0	0	0	0	0	774850	1432000	735617	5125500	0	0	1708500	3714100	0	0	1.23803e+06	0	2294800	2940400	1.74507e+06	0	0	0	0	0	0	1494300	498100
A0A078FED1	ACR12	ACT domain-containing protein	tr|A0A078FED1|A0A078FED1_BRANA BnaA03g01400D protein OS=Brassica napus GN=BnaA03g01400D PE=4 SV=1;tr|A0A078CVZ0|A0A078CVZ0_BRANA BnaC03g01710D protein OS=Brassica napus GN=BnaC03g01710D PE=4 SV=1;tr|A0A078EUJ9|A0A078EUJ9_BRANA BnaAnng01030D protein OS=Bras	32.447	291	2	5298800	5523800	5122500	5.31503e+06	4013200	3802600	7205200	5007000	16936000	27557000	17845000	2.07793e+07	3452500	8200600	6261300	5.97147e+06	3335500	55231000	6648100	21738200	0	0	2478100	826033	0	3166400	521590	1229330	0	9964300	6786900	5.58373e+06
A0A078GH13	RPS3B	40S ribosomal protein S3-2	tr|A0A078GH13|A0A078GH13_BRANA BnaC03g17580D protein OS=Brassica napus GN=BnaC03g17580D PE=4 SV=1;tr|A0A078D6N4|A0A078D6N4_BRANA BnaA03g14550D protein OS=Brassica napus GN=BnaA03g14550D PE=4 SV=1;tr|A0A078D6H5|A0A078D6H5_BRANA BnaA03g14630D protein OS=Bras	27.355	249	6	135530000	92253000	56706000	9.48297e+07	97675000	116020000	153690000	1.22462e+08	91967000	149290000	137320000	1.26192e+08	41199000	59865000	34479000	45181000	22070000	55993000	35128000	3.77303e+07	105130000	83992000	64289000	8.44703e+07	786570000	94126000	187970000	356222000	214970000	243950000	136890000	1.98603e+08
A0A078HR87	PSAN	Photosystem I reaction center subunit PSI-N, chloroplast, putative / PSI-N, putative (PSAN)	tr|A0A078HR87|A0A078HR87_BRANA BnaC02g42890D protein OS=Brassica napus GN=BnaC02g42890D PE=4 SV=1;tr|A0A078I3T0|A0A078I3T0_BRANA BnaA06g23190D protein OS=Brassica napus GN=BnaA06g23190D PE=4 SV=1;tr|A0A078D812|A0A078D812_BRANA BnaC03g50210D protein OS=Bras	18.105	169	5	1015300000	1835300000	844950000	1231850000	469200000	1498300000	1021900000	9.96467e+08	3363000000	2592000000	1300300000	2.41843e+09	0	0	0	0	1181900000	1511400000	1049500000	1247600000	1456900000	591490000	1234100000	1.09416e+09	13321000	1697400000	1618400000	1109707000	504130000	537410000	695570000	5.79037e+08
A0A078HP93	XYL2	Putative alpha-xylosidase 2 (EC 3.2.1.177)	tr|A0A078HP93|A0A078HP93_BRANA BnaC06g30160D protein OS=Brassica napus GN=BnaC06g30160D PE=3 SV=1;tr|A0A078E9F8|A0A078E9F8_BRANA BnaA07g27230D protein OS=Brassica napus GN=BnaA07g27230D PE=3 SV=1;tr|A0A078CWK8|A0A078CWK8_BRANA BnaC02g18350D protein OS=Bras	96.988	868	5	273000000	70317000	523030000	2.88782e+08	69039000	722650000	331140000	3.74276e+08	1791200000	982270000	240290000	1.00459e+09	75960000	147560000	143520000	1.22347e+08	216600000	163640000	129170000	1.69803e+08	0	0	0	0	0	78765000	98174000	5.89797e+07	249120000	512470000	259500000	3.40363e+08
A0A078J2V6	HSP70-10	Heat shock 70 kDa protein 10(Heat shock protein 70-10)	tr|A0A078J2V6|A0A078J2V6_BRANA BnaA03g55950D protein OS=Brassica napus GN=BnaA03g55950D PE=3 SV=1;tr|A0A078CWL9|A0A078CWL9_BRANA BnaC03g03860D protein OS=Brassica napus GN=BnaC03g03860D PE=3 SV=1	72.704	681	3	18282000	26977000	26578000	2.39457e+07	14076000	11449000	9996900	1.18406e+07	30915000	41557000	24197000	32223000	0	0	0	0	53389000	24990000	15925000	3.14347e+07	7283100	9618600	7566100	8.15593e+06	8707300	8170000	18851000	1.19094e+07	50757000	56555000	57473000	5.49283e+07
A0A078G085	DPE1	4-alpha-glucanotransferase DPE1 (EC 2.4.1.25)	tr|A0A078G085|A0A078G085_BRANA 4-alpha-glucanotransferase OS=Brassica napus GN=BnaA09g07040D PE=3 SV=1;tr|A0A078CWW5|A0A078CWW5_BRANA 4-alpha-glucanotransferase OS=Brassica napus GN=BnaC09g06730D PE=3 SV=1	64.134	573	1	0	0	0	0	4971600	2906800	0	2.62613e+06	0	0	0	0	0	0	0	0	0	0	0	0	3847700	0	4647700	2831800	0	3358900	3606700	2.32187e+06	5624400	0	6658600	4.09433e+06
A0A078FNX7	GRF8	Growth-regulating factor 8	tr|A0A078FNX7|A0A078FNX7_BRANA BnaC03g48970D protein OS=Brassica napus GN=BnaC03g48970D PE=3 SV=1;tr|A0A078IZ96|A0A078IZ96_BRANA BnaA09g52470D protein OS=Brassica napus GN=BnaA09g52470D PE=3 SV=1;tr|A0A078CWY6|A0A078CWY6_BRANA BnaC09g06980D protein OS=Bras	27.961	248	1	477300	0	0	159107	0	0	0	0	0	2673000	0	891000	0	0	0	0	0	0	1072600	357533	0	0	0	0	0	0	0	0	0	894880	866820	587233
A0A078HJJ5	ARL8A	ADP-ribosylation factor-like protein 8a	tr|A0A078HJJ5|A0A078HJJ5_BRANA BnaAnng05070D protein OS=Brassica napus GN=BnaAnng05070D PE=4 SV=1;tr|A0A078HFC8|A0A078HFC8_BRANA BnaC03g48600D protein OS=Brassica napus GN=BnaC03g48600D PE=3 SV=1;tr|A0A078GCG6|A0A078GCG6_BRANA BnaA03g40610D protein OS=Bras	14.027	128	1	0	2773400	0	924467	0	1008200	0	336067	0	0	0	0	0	5543800	3717400	3.08707e+06	1620400	0	4222000	1.94747e+06	0	4907600	5255400	3.38767e+06	18935000	0	2872600	7269200	0	129010000	0	4.30033e+07
A0A078CX41	RH3	DEAD-box ATP-dependent RNA helicase 3	tr|A0A078CX41|A0A078CX41_BRANA BnaC07g28800D protein OS=Brassica napus GN=BnaC07g28800D PE=4 SV=1;tr|A0A078JAT9|A0A078JAT9_BRANA BnaA06g39420D protein OS=Brassica napus GN=BnaA06g39420D PE=4 SV=1;tr|A0A078DCY2|A0A078DCY2_BRANA BnaC09g03600D protein OS=Bras	78.587	728	10	39164000	10182000	91875000	4.70737e+07	88841000	130090000	52239000	90390000	138560000	11897000	204870000	1.18442e+08	56181000	38244000	33323000	4.25827e+07	186310000	104940000	54435000	1.15228e+08	0	0	0	0	257960000	51054000	42978000	1.17331e+08	236740000	186920000	563390000	3.29017e+08
A0A078EBR4	RPS12C	40S ribosomal protein S12-2	tr|A0A078EBR4|A0A078EBR4_BRANA 40S ribosomal protein S12 OS=Brassica napus GN=BnaA08g23710D PE=3 SV=1;tr|A0A078D9E2|A0A078D9E2_BRANA 40S ribosomal protein S12 OS=Brassica napus GN=BnaC08g16820D PE=3 SV=1;tr|A0A078H9F8|A0A078H9F8_BRANA 40S ribosomal protein	13.024	120	1	22870000	0	8138000	10336000	37856000	127570000	3707200	5.63777e+07	41556000	46819000	35919000	4.14313e+07	7934500	18841000	0	8.92517e+06	17172000	0	55964000	2.43787e+07	8216900	4683100	0	4300000	0	0	12270000	4090000	0	5712400	12272000	5994800
A0A078CXB7	RAB18	Dehydrin Rab18	tr|A0A078CXB7|A0A078CXB7_BRANA BnaC09g08130D protein OS=Brassica napus GN=BnaC09g08130D PE=3 SV=1	15.026	144	1	136600	211300	0	115997	0	0	0	0	753850	0	603780	452543	0	0	0	0	588540	792870	165340	515583	0	0	0	0	0	0	0	0	1143000	1704300	959360	1.26889e+06
A0A078CXG3	IPMS1	2-isopropylmalate synthase 1	tr|A0A078CXG3|A0A078CXG3_BRANA BnaC08g37250D protein OS=Brassica napus GN=BnaC08g37250D PE=3 SV=1;tr|A0A078GLN7|A0A078GLN7_BRANA BnaA06g12630D protein OS=Brassica napus GN=BnaA06g12630D PE=3 SV=1;tr|A0A078G8H7|A0A078G8H7_BRANA BnaA09g44550D protein OS=Bras	68.321	629	3	0	44428000	11436000	1.86213e+07	32148000	129260000	156670000	106026000	0	0	0	0	14563000	8300000	5424000	9429000	34145000	7848100	0	13997700	37125000	12745000	18207000	2.26923e+07	63866000	8038700	8834300	26913000	24641000	23893000	18327000	22287000
A0A078HHK9	ALDH6B2	Aldehyde dehydrogenase 6B2	tr|A0A078HHK9|A0A078HHK9_BRANA BnaA09g08370D protein OS=Brassica napus GN=BnaA09g08370D PE=4 SV=1;tr|A0A078CXH3|A0A078CXH3_BRANA BnaC09g08630D protein OS=Brassica napus GN=BnaC09g08630D PE=4 SV=1	56.629	527	2	0	0	13507000	4.50233e+06	0	29893000	0	9.96433e+06	16584000	33557000	37913000	2.93513e+07	19410000	29383000	28095000	2.56293e+07	36835000	52495000	41697000	4.36757e+07	72472000	0	0	2.41573e+07	0	12248000	0	4.08267e+06	83603000	85998000	21061000	63554000
A0A078FDX8	PDX13	Pyridoxal 5'-phosphate synthase subunit PDX1.3	tr|A0A078FDX8|A0A078FDX8_BRANA BnaA03g00380D protein OS=Brassica napus GN=BnaA03g00380D PE=3 SV=1;tr|A0A078CXL1|A0A078CXL1_BRANA BnaC03g00280D protein OS=Brassica napus GN=BnaC03g00280D PE=3 SV=1	33.184	309	1	41987000	0	20001000	2.06627e+07	16822000	0	109130000	41984000	11213000	22291000	31020000	21508000	0	27607000	0	9.20233e+06	10640000	0	0	3.54667e+06	41126000	27060000	10512000	2.62327e+07	0	21114000	50418000	23844000	19506000	4084700	19124000	1.42382e+07
A0A078F5D8	RPS2A	40S ribosomal protein S2-1	tr|A0A078F5D8|A0A078F5D8_BRANA BnaA04g24120D protein OS=Brassica napus GN=BnaA04g24120D PE=3 SV=1;tr|A0A078GBY2|A0A078GBY2_BRANA BnaC03g23520D protein OS=Brassica napus GN=BnaC03g23520D PE=3 SV=1;tr|A0A078FK35|A0A078FK35_BRANA BnaC04g47870D protein OS=Bras	27.99	256	5	23141000	31204000	33077000	2.91407e+07	26665000	50215000	101580000	5.94867e+07	14176000	46498000	13674000	2.47827e+07	14440000	10407000	15745000	1.35307e+07	11677000	6965100	0	6.21403e+06	4776600	9193500	16137000	10035700	0	45330000	45742000	3.03573e+07	27033000	25826000	17934000	2.35977e+07
A0A078CXR7	NTRC	NADPH-dependent thioredoxin reductase 3 NTR3	tr|A0A078CXR7|A0A078CXR7_BRANA Thioredoxin reductase OS=Brassica napus GN=BnaA05g02330D PE=3 SV=1;tr|A0A078GBK2|A0A078GBK2_BRANA Thioredoxin reductase OS=Brassica napus GN=BnaC04g02020D PE=3 SV=1;tr|A0A078HAC7|A0A078HAC7_BRANA Thioredoxin reductase OS=Bras	59.032	534	4	0	6437800	8425500	4.95443e+06	11756000	9728300	8937100	1.01405e+07	4409400	6513200	7153500	6.02537e+06	22656000	14549000	64291000	33832000	7147300	18157000	8071700	1.11253e+07	3950800	27148000	28288000	19795600	2658800	13478000	25441000	1.38593e+07	11804000	16259000	28541000	18868000
A0A078CXT7	RPL10A	60S ribosomal protein L10-1	tr|A0A078CXT7|A0A078CXT7_BRANA BnaC08g39710D protein OS=Brassica napus GN=BnaC08g39710D PE=4 SV=1;tr|A0A078IG77|A0A078IG77_BRANA BnaA07g24130D protein OS=Brassica napus GN=BnaA07g24130D PE=4 SV=1;tr|A0A078IE34|A0A078IE34_BRANA BnaA06g09110D protein OS=Bras	20.475	183	2	6493400	0	4985800	3826400	17559000	26483000	0	1.46807e+07	0	12429000	7230300	6553100	14054000	0	9483600	7.84587e+06	6161000	0	11003000	5.72133e+06	0	187850000	41786000	7.65453e+07	0	27239000	43950000	2.37297e+07	14575000	10333000	7712100	1.08734e+07
A0A078H8D4	ZHD14	Zinc-finger homeodomain protein 14 (AtZHD14)	tr|A0A078H8D4|A0A078H8D4_BRANA BnaA09g45550D protein OS=Brassica napus GN=BnaA09g45550D PE=4 SV=1;tr|A0A078CXZ3|A0A078CXZ3_BRANA BnaC08g39390D protein OS=Brassica napus GN=BnaC08g39390D PE=4 SV=1	20.331	172	1	0	0	0	0	72761000	2628700000	2702900000	1.80145e+09	0	0	0	0	0	617410000	0	2.05803e+08	0	0	1327100000	4.42367e+08	0	0	0	0	0	0	0	0	72425000	0	0	2.41417e+07
A0A078HBB1	CHLOROPHYLL PROTEIN 24	Chlorophyll a-b binding protein	tr|A0A078HBB1|A0A078HBB1_BRANA Chlorophyll a-b binding protein, chloroplastic OS=Brassica napus GN=BnaA06g10520D PE=3 SV=1;tr|A0A078H682|A0A078H682_BRANA Chlorophyll a-b binding protein, chloroplastic OS=Brassica napus GN=BnaC05g12070D PE=3 SV=1;tr|A0A078I	27.613	258	5	1333700000	1577700000	2275900000	1729100000	679730000	1088500000	622570000	7.96933e+08	1426400000	908620000	1270800000	1201940000	1272000000	703180000	870190000	9.48457e+08	1467200000	1380700000	1129300000	1.32573e+09	157660000	206030000	144170000	1.69287e+08	6241500000	397070000	297040000	2311870000	691010000	515510000	972380000	726300000
A0A078CY16	XK1	D-ribulose kinase	tr|A0A078CY16|A0A078CY16_BRANA BnaC08g35800D protein OS=Brassica napus GN=BnaC08g35800D PE=4 SV=1	53.235	484	1	0	379100	884800	421327	0	0	983080	327693	0	0	0	0	0	3137500	1418800	1.51877e+06	9961800	3320600	0	4.42747e+06	8100700	0	15939000	8.01323e+06	31196000	2640800	2798400	1.22117e+07	1896100	7734100	5516500	5048900
A0A078CY27	At2g21530	SMAD/FHA domain-containing protein	tr|A0A078CY27|A0A078CY27_BRANA BnaC08g35600D protein OS=Brassica napus GN=BnaC08g35600D PE=4 SV=1;tr|A0A078FLK7|A0A078FLK7_BRANA BnaA09g43110D protein OS=Brassica napus GN=BnaA09g43110D PE=4 SV=1	23.03	210	4	371100000	1174600000	1459500000	1.00173e+09	443870000	363090000	999380000	6.02113e+08	459070000	2633400000	881100000	1.32452e+09	1496400000	725230000	448580000	890070000	357900000	893640000	0	417180000	982260000	1001100000	1205200000	1.06285e+09	11844000	256250000	414490000	227528000	22339000	402460000	0	1.416e+08
A0A078D6D2	ALAAT2	Alanine aminotransferase 2	tr|A0A078D6D2|A0A078D6D2_BRANA BnaC08g17310D protein OS=Brassica napus GN=BnaC08g17310D PE=4 SV=1;tr|A0A078G9Q7|A0A078G9Q7_BRANA BnaA09g45030D protein OS=Brassica napus GN=BnaA09g45030D PE=4 SV=1;tr|A0A078CYA6|A0A078CYA6_BRANA BnaC08g37860D protein OS=Bras	59.142	541	1	0	0	0	0	0	0	0	0	0	0	0	0	0	0	0	0	0	0	0	0	6967300	0	0	2.32243e+06	0	0	0	0	0	2245900	2022500	1422800
A0A078E669	PP2AB2	Serine/threonine protein phosphatase 2A 55 kDa regulatory subunit B beta isoform	tr|A0A078E669|A0A078E669_BRANA Serine/threonine-protein phosphatase 2A 55 kDa regulatory subunit B OS=Brassica napus GN=BnaA08g22990D PE=3 SV=1;tr|A0A078D401|A0A078D401_BRANA Serine/threonine-protein phosphatase 2A 55 kDa regulatory subunit B OS=Brassica n	53.833	479	1	0	0	0	0	0	741990	2299700	1.0139e+06	0	0	0	0	787100	0	662930	483343	0	0	0	0	0	0	0	0	0	0	0	0	0	0	1203100	401033
A0A078G8K2	FC1	Serine/threonine-protein kinase AFC1	tr|A0A078G8K2|A0A078G8K2_BRANA Nascent polypeptide-associated complex subunit beta OS=Brassica napus GN=BnaA09g44800D PE=3 SV=1;tr|A0A078CYE2|A0A078CYE2_BRANA Nascent polypeptide-associated complex subunit beta OS=Brassica napus GN=BnaC08g37490D PE=3 SV=1;	16.773	156	1	0	0	18556000	6.18533e+06	35330000	30132000	0	2.18207e+07	11556000	0	16782000	9446000	0	0	0	0	0	19151000	0	6.38367e+06	0	42296000	21929000	2.14083e+07	0	5177400	39986000	1.50545e+07	0	0	8900300	2.96677e+06
A0A078CYF4	RFI2	E3 ubiquitin-protein ligase	tr|A0A078CYF4|A0A078CYF4_BRANA BnaA05g00280D protein OS=Brassica napus GN=BnaA05g00280D PE=4 SV=1;tr|A0A078E1U1|A0A078E1U1_BRANA BnaC03g26110D protein OS=Brassica napus GN=BnaC03g26110D PE=4 SV=1;tr|A0A078D2H0|A0A078D2H0_BRANA BnaA03g21840D protein OS=Bras	17.495	162	2	0	0	0	0	0	0	0	0	0	0	0	0	0	0	2751800	917267	13983000	5244000	0	6409000	0	0	0	0	0	0	0	0	19105000	6459200	18063000	14542400
A0A078CYI7	ALP	Aleurain-like protease	tr|A0A078CYI7|A0A078CYI7_BRANA BnaC09g35690D protein OS=Brassica napus GN=BnaC09g35690D PE=3 SV=1;tr|Q3HM22|Q3HM22_BRANA Cysteine protease OS=Brassica napus PE=2 SV=1;tr|A0A078GYM1|A0A078GYM1_BRANA BnaA10g13210D protein OS=Brassica napus GN=BnaA10g13210D P	39.29	358	3	5198400	4778400	6095300	5.35737e+06	2220500	2820700	1402700	2.14797e+06	8086400	12796000	11108000	1.06635e+07	16956000	5148200	3559200	8.55447e+06	22879000	38862000	11533000	2.44247e+07	2659600	0	0	886533	0	2735300	4984400	2.57323e+06	7630300	40301000	7191900	18374400
A0A078CYQ5	At5g08530	NADH dehydrogenase [ubiquinone] flavoprotein 1	tr|A0A078CYQ5|A0A078CYQ5_BRANA BnaC03g03630D protein OS=Brassica napus GN=BnaC03g03630D PE=4 SV=1	13.591	119	1	0	0	0	0	0	0	0	0	0	0	0	0	0	0	5952300	1984100	0	2991000	2761600	1.91753e+06	3252300	2731500	3205500	3063100	0	0	0	0	35618000	0	0	1.18727e+07
A0A078DSM2	ACT8	Actin-8	tr|A0A078DSM2|A0A078DSM2_BRANA BnaA05g21360D protein OS=Brassica napus GN=BnaA05g21360D PE=3 SV=1;tr|D8L1W0|D8L1W0_BRANA Actin2.2 OS=Brassica napus GN=BnaA05g21350D PE=2 SV=1;tr|D8L1V9|D8L1V9_BRANA Actin2.1 OS=Brassica napus PE=2 SV=1;tr|A0A078J693|A0A078J	35.322	317	3	10265000	9887600	1785100	7.31257e+06	7848600	11658000	10735000	1.00805e+07	19250000	34501000	15105000	22952000	8410600	6628900	4186300	6408600	20165000	10910000	6914700	1.26632e+07	0	0	0	0	31067000	22588000	26254000	2.66363e+07	10298000	2042600	10535000	7625200
A0A078HPI9	At2g20360	NADH dehydrogenase [ubiquinone] 1 alpha subcomplex subunit 9	tr|A0A078HPI9|A0A078HPI9_BRANA BnaA09g10240D protein OS=Brassica napus GN=BnaA09g10240D PE=4 SV=1;tr|A0A078CYR5|A0A078CYR5_BRANA BnaC08g36360D protein OS=Brassica napus GN=BnaC08g36360D PE=4 SV=1;tr|A0A078GZW1|A0A078GZW1_BRANA BnaA07g00250D protein OS=Bras	44.182	403	1	0	0	0	0	0	0	1112400	370800	0	0	0	0	0	991090	963480	651523	0	0	3059000	1.01967e+06	0	0	0	0	0	0	2975800	991933	3634000	16065000	0	6.56633e+06
A0A078JXN5	PPA6	Soluble inorganic pyrophosphatase 6(EC 3.6.1.1)	tr|A0A078JXN5|A0A078JXN5_BRANA BnaAnng37560D protein OS=Brassica napus GN=BnaAnng37560D PE=4 SV=1;tr|A0A078CYS5|A0A078CYS5_BRANA BnaC03g03880D protein OS=Brassica napus GN=BnaC03g03880D PE=4 SV=1;tr|A0A078J0N0|A0A078J0N0_BRANA BnaA03g55930D protein OS=Bras	29.621	265	3	17461000	3435000	0	6.96533e+06	5080400	741710	19425000	8.4157e+06	6928700	11667000	10020000	9.53857e+06	38643000	3047300	0	1.38968e+07	6068400	3340100	21575000	1.03278e+07	0	19535000	29582000	1.63723e+07	0	12373000	0	4.12433e+06	4316000	3866600	14771000	7651200
A0A078CYW9	TIM	Triosephosphate isomerase, chloroplastic TIM Triose-phosphate isomerase	tr|A0A078CYW9|A0A078CYW9_BRANA BnaC08g35990D protein OS=Brassica napus GN=BnaC08g35990D PE=3 SV=1	34.01	320	1	0	0	0	0	0	4993100	2822300	2.60513e+06	0	0	0	0	0	0	0	0	0	9263100	8664800	5.97597e+06	0	0	0	0	0	0	2131600	710533	0	0	0	0
A0A078CZ82	SS1	Starch synthase 1	tr|A0A078CZ82|A0A078CZ82_BRANA Starch synthase, chloroplastic/amyloplastic OS=Brassica napus GN=BnaC07g30160D PE=3 SV=1	71.712	651	1	0	511000	0	170333	265590	549790	456160	423847	1071500	903750	0	658417	449550	444330	260390	384757	1018400	0	500630	506343	1466200	1534900	497250	1.16612e+06	0	587710	1629300	739003	1232800	818720	882110	977877
A0A078J964	PSBT	Photosystem II reaction center protein T (PSII-T)	tr|A0A078J964|A0A078J964_BRANA BnaAnng17550D protein OS=Brassica napus GN=BnaAnng17550D PE=4 SV=1;tr|A0A078F3W0|A0A078F3W0_BRANA BnaC05g31270D protein OS=Brassica napus GN=BnaC05g31270D PE=4 SV=1;tr|A0A078HG31|A0A078HG31_BRANA BnaA01g25400D protein OS=Bras	8.3147	77	1	60210000	9559200	10509000	26759400	123750	2534300	7363600	3340550	6888900	643060	341180	2624380	5633300	23827000	46221000	25227100	216450	227990	0	148147	26661000	19905000	8346200	1.83041e+07	0	129140000	134500000	87880000	116010000	128170000	5617300	8.32658e+07
A0A078J1U3	SDH1-1	Succinate dehydrogenase [ubiquinone] flavoprotein subunit 1(EC 1.3.5.1)	tr|A0A078J1U3|A0A078J1U3_BRANA Succinate dehydrogenase [ubiquinone] flavoprotein subunit, mitochondrial OS=Brassica napus GN=BnaA09g52600D PE=3 SV=1;tr|A0A078IV31|A0A078IV31_BRANA Succinate dehydrogenase [ubiquinone] flavoprotein subunit, mitochondrial OS=	69.023	627	5	45901000	0	16542000	2.08143e+07	16834000	26202000	41145000	2.80603e+07	18573000	18319000	7942300	1.49448e+07	60347000	43522000	44782000	4.95503e+07	22275000	2102900	0	8.12597e+06	112990000	35634000	78050000	75558000	2114900	33681000	6015500	1.39371e+07	181260000	47058000	60117000	96145000
A0A078IP32	RH2	Eukaryotic initiation factor 4A-III homolog(EC 3.6.4.13)	tr|A0A078IP32|A0A078IP32_BRANA BnaA05g36790D protein OS=Brassica napus GN=BnaA05g36790D PE=4 SV=1;tr|A0A078HUL6|A0A078HUL6_BRANA BnaA01g25900D protein OS=Brassica napus GN=BnaA01g25900D PE=4 SV=1;tr|A0A078H6B7|A0A078H6B7_BRANA BnaC01g33090D protein OS=Bras	45.948	408	1	4766900	0	5030900	3.26593e+06	10332000	9885400	11914000	1.07105e+07	8583600	6143600	8100200	7.60913e+06	3887800	8227600	0	4.03847e+06	4033000	0	9688800	4.57393e+06	0	11303000	13050000	8.11767e+06	0	0	9902000	3.30067e+06	21696000	0	102820000	4.15053e+07
A0A078GEC9	PREP1	Presequence protease 1	tr|A0A078GEC9|A0A078GEC9_BRANA BnaC03g40860D protein OS=Brassica napus GN=BnaC03g40860D PE=4 SV=1;tr|A0A078CZL4|A0A078CZL4_BRANA BnaA03g35140D protein OS=Brassica napus GN=BnaA03g35140D PE=4 SV=1;tr|A0A078JQH7|A0A078JQH7_BRANA BnaC01g43760D protein OS=Bras	119.95	1074	13	163340000	85000000	195590000	1.47977e+08	140040000	98409000	181410000	139953000	166910000	42860000	131610000	1.13793e+08	294300000	130380000	269340000	231340000	110740000	56902000	110240000	9.26273e+07	291850000	87102000	135620000	171524000	2556400000	154080000	213290000	974590000	242490000	453400000	382670000	359520000
A0A078GD41	PGDH3	D-3-phosphoglycerate dehydrogenase 3(EC 1.1.1.95)	tr|A0A078GD41|A0A078GD41_BRANA D-3-phosphoglycerate dehydrogenase OS=Brassica napus GN=BnaC03g40970D PE=3 SV=1;tr|A0A078CZL5|A0A078CZL5_BRANA D-3-phosphoglycerate dehydrogenase OS=Brassica napus GN=BnaA03g35260D PE=3 SV=1	62.133	587	3	0	11282000	5630100	5.63737e+06	3347200	0	10857000	4.73473e+06	5276500	5980600	3156400	4804500	6227200	22460000	19187000	1.59581e+07	6004100	0	0	2.00137e+06	11991000	17395000	15776000	15054000	69406000	9175900	20775000	3.3119e+07	10459000	9785900	16650000	12298300
A0A078IHX3	HXK1	Hexokinase-1 (EC 2.7.1.1) (Protein GLUCOSE INSENSITIVE 2)	tr|A0A078IHX3|A0A078IHX3_BRANA Phosphotransferase OS=Brassica napus GN=BnaA09g10080D PE=3 SV=1;tr|A0A078EQ35|A0A078EQ35_BRANA Phosphotransferase OS=Brassica napus GN=BnaC09g10170D PE=3 SV=1;tr|A0A078D029|A0A078D029_BRANA Phosphotransferase OS=Brassica napu	53.896	499	4	0	0	0	0	0	0	0	0	909590	0	0	303197	111610000	27324000	43792000	6.09087e+07	0	61294000	0	2.04313e+07	20055000	0	27816000	15957000	0	0	136520000	4.55067e+07	149410000	217060000	168630000	1.78367e+08
A0A078D059	RPP1C	60S acidic ribosomal protein P1-3	tr|A0A078D059|A0A078D059_BRANA BnaC03g00020D protein OS=Brassica napus GN=BnaC03g00020D PE=3 SV=1;tr|A0A078JC78|A0A078JC78_BRANA BnaAnng17900D protein OS=Brassica napus GN=BnaAnng17900D PE=3 SV=1;tr|A0A078DLC9|A0A078DLC9_BRANA BnaA10g00720D protein OS=Bras	11.301	113	1	0	0	0	0	0	0	0	0	0	0	0	0	10723000	0	0	3.57433e+06	0	11099000	0	3.69967e+06	0	0	0	0	0	0	0	0	15877000	16611000	0	1.08293e+07
A0A078HLS5	At5g45170	Haloacid dehalogenase-like hydrolase (HAD) superfamily protein	tr|A0A078HLS5|A0A078HLS5_BRANA BnaAnng05460D protein OS=Brassica napus GN=BnaAnng05460D PE=4 SV=1;tr|A0A078D0D6|A0A078D0D6_BRANA BnaC07g02840D protein OS=Brassica napus GN=BnaC07g02840D PE=4 SV=1	40.849	374	2	0	0	7290100	2.43003e+06	5342500	0	0	1.78083e+06	0	0	0	0	0	4608900	6923100	3844000	4771900	0	4279900	3.01727e+06	0	5966700	0	1988900	0	6603300	7968500	4.85727e+06	6865800	5076600	0	3980800
A0A078G8K8	At1g18070	Putative guanine nucleotide regulatory protein	tr|A0A078G8K8|A0A078G8K8_BRANA BnaA09g44720D protein OS=Brassica napus GN=BnaA09g44720D PE=4 SV=1;tr|A0A078D0S5|A0A078D0S5_BRANA BnaC08g37420D protein OS=Brassica napus GN=BnaC08g37420D PE=4 SV=1	64.067	576	1	0	0	0	0	0	0	0	0	0	0	0	0	0	0	0	0	2072900	0	2497000	1523300	0	2725400	3125300	1.95023e+06	0	0	1023100	341033	0	0	4714700	1.57157e+06
A0A078D0U6	RPL28A	60S ribosomal protein L28-1	tr|A0A078D0U6|A0A078D0U6_BRANA BnaC07g01510D protein OS=Brassica napus GN=BnaC07g01510D PE=4 SV=1;tr|A0A078HDP1|A0A078HDP1_BRANA BnaA07g01060D protein OS=Brassica napus GN=BnaA07g01060D PE=4 SV=1;tr|A0A078G9F7|A0A078G9F7_BRANA BnaA09g44030D protein OS=Bras	16.033	143	2	9216200	95765000	85768000	6.35831e+07	32593000	12572000	143500000	6.28883e+07	32181000	44860000	48244000	4.17617e+07	11274000	7902600	13735000	1.09705e+07	35580000	11245000	7752700	1.81926e+07	177640000	11805000	95591000	95012000	220410000	171510000	122030000	1.71317e+08	27851000	23543000	25414000	2.56027e+07
A0A078HDP7	PRO1	Profilin-1 (allergen Ara t 8)	tr|A0A078HDP7|A0A078HDP7_BRANA Profilin OS=Brassica napus GN=BnaA07g01010D PE=3 SV=1;tr|A0A078D0U9|A0A078D0U9_BRANA Profilin OS=Brassica napus GN=BnaC07g01460D PE=3 SV=1	14.043	131	1	1576300	0	2586700	1.38767e+06	0	0	0	0	3310300	4252800	2835200	3466100	0	0	0	0	0	0	0	0	0	26188000	0	8.72933e+06	0	0	0	0	0	0	11023000	3.67433e+06
A0A078D197	AGAL2	Alpha-galactosidase 2	tr|A0A078D197|A0A078D197_BRANA Alpha-galactosidase OS=Brassica napus GN=BnaC03g03520D PE=3 SV=1;tr|A0A078CQI7|A0A078CQI7_BRANA Alpha-galactosidase OS=Brassica napus GN=BnaA03g02510D PE=3 SV=1	44.254	398	2	0	0	0	0	0	0	0	0	0	0	0	0	0	0	0	0	0	0	0	0	0	0	0	0	0	0	0	0	0	0	0	0
A0A078J6Q9	FTRA2	Ferredoxin/thioredoxin reductase subunit A (Variable subunit) 2	tr|A0A078J6Q9|A0A078J6Q9_BRANA BnaA03g55720D protein OS=Brassica napus GN=BnaA03g55720D PE=4 SV=1;tr|A0A078D1A0|A0A078D1A0_BRANA BnaC03g03570D protein OS=Brassica napus GN=BnaC03g03570D PE=4 SV=1	18.813	171	1	42391000	0	4921000	1.57707e+07	4589400	0	46804000	1.71311e+07	0	0	9214700	3.07157e+06	0	0	0	0	15269000	0	0	5.08967e+06	13850000	152390000	65604000	7.72813e+07	0	0	18122000	6.04067e+06	0	13364000	11019000	8.12767e+06
A0A078D1B1	FBA1	Fructose-bisphosphate aldolase 1	tr|A0A078D1B1|A0A078D1B1_BRANA Fructose-bisphosphate aldolase OS=Brassica napus GN=BnaC08g35820D PE=3 SV=1	42.81	398	1	0	0	44499000	14833000	5898900	0	9563600	5.15417e+06	0	0	2753500	917833	0	0	0	0	0	0	0	0	7098100	7338300	0	4.81213e+06	0	12370000	8046100	6.80537e+06	4443000	0	18635000	7.69267e+06
A0A078D1C0	PAP2	Probable plastid-lipid-associated protein 2	tr|A0A078D1C0|A0A078D1C0_BRANA BnaC01g13750D protein OS=Brassica napus GN=BnaC01g13750D PE=4 SV=1	34.585	317	1	0	9983300	13932000	7.97177e+06	14590000	5379200	18141000	12703400	18158000	63041000	42759000	4.13193e+07	41890000	43033000	32836000	39253000	0	0	0	0	3184800	37272000	0	13485600	189760000	0	18762000	6.95073e+07	38267000	0	0	1.27557e+07
A0A078HXP0	At4g39150	heat shock N-terminal domain-containing protein	tr|A0A078HXP0|A0A078HXP0_BRANA BnaC01g00240D protein OS=Brassica napus GN=BnaC01g00240D PE=4 SV=1;tr|A0A078HW40|A0A078HW40_BRANA BnaA01g05380D protein OS=Brassica napus GN=BnaA01g05380D PE=4 SV=1;tr|A0A078FKY5|A0A078FKY5_BRANA BnaA09g43130D protein OS=Bras	38.418	344	1	0	30727000	0	1.02423e+07	26325000	0	0	8775000	26333000	0	0	8.77767e+06	17562000	0	0	5854000	46101000	0	26148000	24083000	0	0	0	0	0	0	0	0	23670000	0	0	7890000
A0A078D1P0	PBE1	20S proteasome beta subunit E1	tr|A0A078D1P0|A0A078D1P0_BRANA BnaA03g22250D protein OS=Brassica napus GN=BnaA03g22250D PE=4 SV=1;tr|Q6R1M7|Q6R1M7_BRANA Putative proteasome 20S beta5 subunit (Fragment) OS=Brassica napus PE=2 SV=1;tr|A0A078HAV4|A0A078HAV4_BRANA Proteasome subunit beta typ	14.683	134	2	11213000	0	0	3.73767e+06	16969000	0	15499000	1.08227e+07	0	122810000	0	4.09367e+07	0	0	0	0	0	11276000	9812000	7.02933e+06	0	0	0	0	0	9423500	11049000	6.82417e+06	9837900	5654500	7352800	7.61507e+06
A0A078E317	PDIL2-1	Protein disulfide-isomerase like 2-1	tr|A0A078E317|A0A078E317_BRANA BnaC03g26070D protein OS=Brassica napus GN=BnaC03g26070D PE=3 SV=1;tr|A0A078D1S8|A0A078D1S8_BRANA BnaA03g21800D protein OS=Brassica napus GN=BnaA03g21800D PE=3 SV=1	39.576	362	2	114790000	0	0	3.82633e+07	185120000	0	207540000	1.30887e+08	0	0	0	0	0	47201000	17909000	2.17033e+07	0	0	0	0	55189000	96518000	141410000	9.77057e+07	0	0	0	0	169840000	156140000	175640000	1.67207e+08
A0A078D229	PSBO1	Oxygen-evolving enhancer protein 1-1	tr|A0A078D229|A0A078D229_BRANA BnaC09g07990D protein OS=Brassica napus GN=BnaC09g07990D PE=4 SV=1;tr|A0A078GMU3|A0A078GMU3_BRANA BnaC01g23800D protein OS=Brassica napus GN=BnaC01g23800D PE=4 SV=1;tr|A0A078H8X9|A0A078H8X9_BRANA BnaA01g19750D protein OS=Bras	35.187	332	13	4080500000	4698200000	4520300000	4433000000	3892600000	5230700000	6102000000	5075100000	9701600000	9617100000	8540000000	9.28623e+09	9431200000	6023200000	5429900000	6.96143e+09	6362000000	4949900000	7223400000	6.17843e+09	3826400000	5699900000	7859800000	5.79537e+09	422630000	5321800000	3821900000	3.18878e+09	2842200000	2713800000	3650000000	3.06867e+09
A0A078J9Z3	RABG3F	Ras-related protein RABG3f	tr|A0A078J9Z3|A0A078J9Z3_BRANA BnaC03g73830D protein OS=Brassica napus GN=BnaC03g73830D PE=4 SV=1;tr|A0A078G1S6|A0A078G1S6_BRANA BnaA01g26470D protein OS=Brassica napus GN=BnaA01g26470D PE=4 SV=1;tr|A0A078FUH4|A0A078FUH4_BRANA BnaA08g02800D protein OS=Bras	23.042	206	2	0	0	0	0	0	0	0	0	0	0	0	0	0	0	0	0	0	0	0	0	0	7042100	0	2.34737e+06	0	0	0	0	43062000	90338000	0	4.44667e+07
A0A078D269	At2g10940	Bifunctional inhibitor/lipid-transfer protein/seed storage 2S albumin superfamily protein	tr|A0A078D269|A0A078D269_BRANA BnaC09g08390D protein OS=Brassica napus GN=BnaC09g08390D PE=4 SV=1;tr|A0A078FZY9|A0A078FZY9_BRANA BnaA09g08190D protein OS=Brassica napus GN=BnaA09g08190D PE=4 SV=1	26.077	256	2	1118900000	121460000	657220000	6.32527e+08	678220000	2930900000	863100000	1490740000	1242500000	482040000	58755000	5.94432e+08	1624900000	1227300000	596630000	1149610000	1013600000	384750000	616140000	6.71497e+08	739380000	753920000	487680000	6.60327e+08	9958400000	399800000	452620000	3.60361e+09	874280000	3087500000	1209700000	1.72383e+09
A0A078D287	AGT1	Serine--glyoxylate aminotransferase	tr|A0A078D287|A0A078D287_BRANA BnaC09g08540D protein OS=Brassica napus GN=BnaC09g08540D PE=3 SV=1	44.149	401	1	0	0	0	0	0	0	0	0	0	0	0	0	0	0	20486000	6.82867e+06	3606300	0	0	1202100	0	0	0	0	0	0	0	0	0	0	0	0
A0A078HK35	PER32	Peroxidase 32 (Atperox P32) (EC 1.11.1.7)	tr|A0A078HK35|A0A078HK35_BRANA Peroxidase OS=Brassica napus GN=BnaA09g08390D PE=3 SV=1;tr|A0A078D2A3|A0A078D2A3_BRANA Peroxidase OS=Brassica napus GN=BnaC09g08690D PE=3 SV=1	33.027	300	2	1085200	874400	0	653230	0	470910	0	156970	106440000	59836000	62805000	7.63603e+07	0	0	0	0	0	3723800	1310200	1678000	0	0	0	0	0	0	0	0	1252600	991160	964670	1.06948e+06
A0A078FL57	At3g26720	Alpha-mannosidase (EC 3.2.1.-)	tr|A0A078FL57|A0A078FL57_BRANA Alpha-mannosidase OS=Brassica napus GN=BnaA06g32690D PE=3 SV=1;tr|A0A078D2N7|A0A078D2N7_BRANA Alpha-mannosidase OS=Brassica napus GN=BnaC07g23810D PE=3 SV=1	115.3	1021	2	0	0	0	0	0	1484700	1287600	924100	2889600	0	2728300	1.87263e+06	2796400	13217000	1840900	5.95143e+06	1526000	0	0	508667	0	0	0	0	0	5369600	2267900	2.54583e+06	1387200	1480900	1930600	1.59957e+06
A0A078I0N6	RPS10	40S ribosomal protein S10, mitochondrial	tr|A0A078I0N6|A0A078I0N6_BRANA BnaA01g30270D protein OS=Brassica napus GN=BnaA01g30270D PE=3 SV=1;tr|A0A078IPN7|A0A078IPN7_BRANA BnaC03g73600D protein OS=Brassica napus GN=BnaC03g73600D PE=3 SV=1;tr|A0A078D2V5|A0A078D2V5_BRANA BnaA03g32670D protein OS=Bras	11.855	103	1	178970000	234170000	108880000	1.74007e+08	0	327430000	558460000	2.95297e+08	368530000	0	0	1.22843e+08	197600000	5553500	103480000	1.02211e+08	0	13931000	0	4.64367e+06	0	53559000	61874000	3.84777e+07	1402300	0	0	467433	59690000	12638000	136170000	6.94993e+07
A0A078I3W0	At2g43620	Endochitinase At2g43620 (EC 3.2.1.14)	tr|A0A078I3W0|A0A078I3W0_BRANA BnaC03g24360D protein OS=Brassica napus GN=BnaC03g24360D PE=4 SV=1;tr|A0A078D2W5|A0A078D2W5_BRANA BnaA03g20340D protein OS=Brassica napus GN=BnaA03g20340D PE=4 SV=1	30.122	278	1	1065800	503700	1666300	1078630	0	0	0	0	2378500	1095100	609880	1361160	0	0	0	0	14945000	2676100	1098100	6.23973e+06	0	0	0	0	0	0	0	0	0	0	0	0
A0A078FNZ1	At2g43180	Phosphoenolpyruvate carboxylase family protein	tr|A0A078FNZ1|A0A078FNZ1_BRANA BnaC04g48680D protein OS=Brassica napus GN=BnaC04g48680D PE=4 SV=1;tr|A0A078D2Z7|A0A078D2Z7_BRANA BnaA03g20090D protein OS=Brassica napus GN=BnaA03g20090D PE=4 SV=1	51.309	476	2	0	0	0	0	0	0	6871100	2.29037e+06	0	12022000	0	4.00733e+06	10625000	12929000	0	7.85133e+06	15011000	0	7587400	7532800	7552100	4664400	0	4.07217e+06	26328000	4037900	0	1.0122e+07	9883900	0	0	3.29463e+06
Q96539	CPN10	Chaperonin 10	sp|Q96539|CH10_BRANA 10 kDa chaperonin OS=Brassica napus PE=3 SV=1;tr|A0A078ISK6|A0A078ISK6_BRANA BnaA08g31360D protein OS=Brassica napus GN=BnaA08g31360D PE=3 SV=1;tr|A0A078HS70|A0A078HS70_BRANA BnaC05g11220D protein OS=Brassica napus GN=BnaC05g11220D PE=	10.711	98	2	17626000	0	4495200	7.37373e+06	10041000	7543500	4758900	7447800	4226800	13607000	40207000	1.93469e+07	1381800	7738300	0	3.04003e+06	0	0	48086000	1.60287e+07	520520	0	0	173507	0	1532600	0	510867	0	0	9049000	3.01633e+06
A0A078D306	RPL3A	50S ribosomal protein L3-1	tr|A0A078D306|A0A078D306_BRANA BnaA03g19990D protein OS=Brassica napus GN=BnaA03g19990D PE=3 SV=1;tr|A0A078HY53|A0A078HY53_BRANA BnaC03g23990D protein OS=Brassica napus GN=BnaC03g23990D PE=3 SV=1	28.76	266	5	12494000	14636000	30178000	1.91027e+07	69686000	32356000	191540000	9.78607e+07	6944800	32690000	2882700	14172500	7147100	5522800	3883700	5.51787e+06	10740000	17718000	12337000	1.35983e+07	132070000	52367000	25214000	6.98837e+07	112500000	3010400	70773000	6.20945e+07	22702000	12915000	0	1.18723e+07
M9VKW9	AVP1	Inorganic H pyrophosphatase family protein	tr|M9VKW9|M9VKW9_BRANA Vacuolar H+ pyrophosphatase 1 OS=Brassica napus GN=VP1 PE=2 SV=1;tr|A0A078HN72|A0A078HN72_BRANA BnaC06g40530D protein OS=Brassica napus GN=BnaC06g40530D PE=3 SV=1;tr|A0A078E493|A0A078E493_BRANA BnaA08g23780D protein OS=Brassica napus	80.428	768	1	557900	743500	918400	739967	0	182680	170200	117627	0	0	0	0	3484300	1240200	1216600	1.98037e+06	0	281050	299100	193383	0	0	0	0	0	575030	1052400	542477	2224400	2244800	5768200	3.41247e+06
A0A078D3F6	G3PA1	Glyceraldehyde-3-phosphate dehydrogenase	tr|A0A078D3F6|A0A078D3F6_BRANA BnaC07g23750D protein OS=Brassica napus GN=BnaC07g23750D PE=3 SV=1	40.903	380	1	0	0	0	0	0	0	0	0	7061600	0	0	2.35387e+06	0	0	0	0	0	0	0	0	0	0	0	0	0	0	0	0	0	8536800	0	2845600
A0A078HBJ2	CYC11	Cytochrome c1 1, heme protein(Complex III subunit 4-1)	tr|A0A078HBJ2|A0A078HBJ2_BRANA BnaA02g28720D protein OS=Brassica napus GN=BnaA02g28720D PE=4 SV=1;tr|A0A078GTN8|A0A078GTN8_BRANA BnaC02g36780D protein OS=Brassica napus GN=BnaC02g36780D PE=4 SV=1;tr|A0A078FMV8|A0A078FMV8_BRANA BnaA06g32300D protein OS=Bras	33.603	307	3	4717700	0	0	1.57257e+06	0	8918600	0	2.97287e+06	0	0	4888500	1629500	9626000	0	6319800	5.31527e+06	0	10032000	0	3344000	6697100	0	0	2.23237e+06	0	5663000	0	1.88767e+06	50110000	0	0	1.67033e+07
A0A078D3I4	FKBP17-2	Peptidyl-prolyl cis-trans isomerase FKBP17-2	tr|A0A078D3I4|A0A078D3I4_BRANA Peptidylprolyl isomerase OS=Brassica napus GN=BnaC08g37380D PE=4 SV=1;tr|A0A078G9L8|A0A078G9L8_BRANA Peptidylprolyl isomerase OS=Brassica napus GN=BnaA09g44680D PE=4 SV=1	27.184	252	1	0	0	0	0	0	0	0	0	0	0	0	0	0	0	0	0	0	0	0	0	0	0	0	0	0	8115100	0	2.70503e+06	0	0	0	0
A0A078D3I6	PSBQ1	Oxygen-evolving enhancer protein 3-1	tr|A0A078D3I6|A0A078D3I6_BRANA BnaC01g12690D protein OS=Brassica napus GN=BnaC01g12690D PE=4 SV=1	24.373	227	1	517640000	0	60335000	1.92658e+08	113210000	421950000	118050000	2.17737e+08	128380000	139850000	251120000	1.73117e+08	0	0	688880000	2.29627e+08	80355000	876110000	313100000	4.23188e+08	185360000	153690000	599110000	312720000	607670	444730000	363620000	2.69653e+08	22423000	51621000	37500000	3.71813e+07
A0A078HY18	LFNR2	Ferredoxin--NADP reductase, leaf isozyme 2(EC 1.18.1.2)	tr|A0A078HY18|A0A078HY18_BRANA BnaC07g14870D protein OS=Brassica napus GN=BnaC07g14870D PE=4 SV=1;tr|A0A078J4S7|A0A078J4S7_BRANA BnaAnng14750D protein OS=Brassica napus GN=BnaAnng14750D PE=4 SV=1;tr|A0A078JAR5|A0A078JAR5_BRANA BnaA08g31180D protein OS=Bras	40.587	364	9	2052100000	232930000	234310000	839780000	804450000	954970000	545490000	7.68303e+08	470720000	743670000	434560000	549650000	2033000000	1243900000	1121200000	1.46603e+09	646510000	669390000	353380000	5.56427e+08	1572800000	1973500000	816110000	1.45414e+09	26897000000	1286400000	1150600000	9778000000	915890000	1209400000	501880000	8.75723e+08
A0A078JYX6	APS2	ADP-glucose pyrophosphorylase small subunit 2	tr|A0A078JYX6|A0A078JYX6_BRANA BnaCnng69640D protein OS=Brassica napus GN=BnaCnng69640D PE=4 SV=1;tr|A0A078D3L1|A0A078D3L1_BRANA BnaC08g19100D protein OS=Brassica napus GN=BnaC08g19100D PE=4 SV=1;tr|A0A078GX68|A0A078GX68_BRANA BnaA01g19120D protein OS=Bras	54.341	483	2	10985000	7931400	1207600	6708000	992020	0	15372000	5.45467e+06	0	6853900	3446400	3.43343e+06	11237000	2767800	0	4.66827e+06	0	0	0	0	11620000	15111000	8875200	1.18687e+07	0	9242100	8518800	5920300	10472000	21619000	25863000	19318000
A0A078D3X6	THF1	Protein THYLAKOID FORMATION 1,	tr|A0A078D3X6|A0A078D3X6_BRANA BnaC08g36130D protein OS=Brassica napus GN=BnaC08g36130D PE=3 SV=1;tr|A0A078FLI1|A0A078FLI1_BRANA BnaA09g43540D protein OS=Brassica napus GN=BnaA09g43540D PE=3 SV=1	33.165	295	5	27766000	0	796340000	274702000	33912000	54872000	37339000	42041000	85915000	66864000	0	5.09263e+07	0	26713000	14894000	13869000	89092000	0	75271000	5.47877e+07	38340000	87240000	51736000	5.91053e+07	0	69417000	80115000	49844000	30899000	37776000	136970000	6.85483e+07
A0A078D3Z4	KTI2	Kunitz trypsin inhibitor 2	tr|A0A078D3Z4|A0A078D3Z4_BRANA Nascent polypeptide-associated complex subunit beta OS=Brassica napus GN=BnaC08g17600D PE=3 SV=1	17.91	165	1	0	0	0	0	0	0	0	0	0	0	0	0	0	0	0	0	0	0	553890	184630	0	0	0	0	0	520090	843570	454553	0	2442000	978490	1.14016e+06
A0A078D416	PTAC16	Protein plastid transcriptionally active 16	tr|A0A078D416|A0A078D416_BRANA BnaA01g20040D protein OS=Brassica napus GN=BnaA01g20040D PE=4 SV=1	54.132	511	5	17949000	7281300	53357000	2.61958e+07	10001000	106340000	100880000	72407000	33589000	3529400	4165700	1.37614e+07	43669000	119150000	96493000	8.64373e+07	88115000	157480000	256860000	167485000	168730000	181710000	127650000	1.59363e+08	773960000	204510000	28630000	335700000	267310000	76332000	124780000	1.56141e+08
A0A078E485	HSP70-5	Heat shock 70 kDa protein 5	tr|A0A078E485|A0A078E485_BRANA BnaA08g23680D protein OS=Brassica napus GN=BnaA08g23680D PE=3 SV=1;tr|A0A078D461|A0A078D461_BRANA BnaC08g16850D protein OS=Brassica napus GN=BnaC08g16850D PE=3 SV=1;tr|A0A078H781|A0A078H781_BRANA BnaC05g12240D protein OS=Bras	71.37	650	2	20857000	16476000	15367000	1.75667e+07	0	0	0	0	0	0	0	0	5073300	0	3671300	2.91487e+06	0	0	0	0	0	0	0	0	0	0	0	0	0	0	0	0
A0A078HQX2	ACR11	Uridylyltransferase-like protein	tr|A0A078HQX2|A0A078HQX2_BRANA BnaC05g12890D protein OS=Brassica napus GN=BnaC05g12890D PE=4 SV=1;tr|A0A078H9L6|A0A078H9L6_BRANA BnaA06g11350D protein OS=Brassica napus GN=BnaA06g11350D PE=4 SV=1;tr|A0A078D470|A0A078D470_BRANA BnaC08g17080D protein OS=Bras	31.055	286	4	2100900000	1396500000	1326200000	1.60787e+09	1189500000	1107600000	806640000	1034580000	1353400000	2889300000	1260600000	1.83443e+09	1293000000	1341300000	328890000	987730000	1572400000	1769300000	811310000	1.38434e+09	102960000	318090000	73218000	164756000	31318000	762470000	732880000	5.08889e+08	420640000	323750000	422000000	3.88797e+08
A0A078D4D9	At2g35440	Catalytic/ hydrolase	tr|A0A078D4D9|A0A078D4D9_BRANA BnaC04g09680D protein OS=Brassica napus GN=BnaC04g09680D PE=4 SV=1	39.365	355	1	0	0	2351900	783967	1191200	3913300	13916000	6.34017e+06	1225200	0	1952500	1.05923e+06	17864000	0	1330200	6.39807e+06	23192000	0	0	7.73067e+06	6920600	0	7286700	4.73577e+06	0	0	2403500	801167	892510	992360	0	628290
A0A078IQ72	At1g14810	Semialdehyde dehydrogenase family protein	tr|A0A078IQ72|A0A078IQ72_BRANA BnaA08g31400D protein OS=Brassica napus GN=BnaA08g31400D PE=3 SV=1;tr|A0A078IL42|A0A078IL42_BRANA BnaC05g49480D protein OS=Brassica napus GN=BnaC05g49480D PE=3 SV=1;tr|A0A078I5V9|A0A078I5V9_BRANA BnaA06g09610D protein OS=Bras	40.684	375	2	0	41148000	31812000	24320000	14789000	0	0	4.92967e+06	9001000	7460500	9174300	8.54527e+06	0	0	0	0	0	0	0	0	11457000	7657000	8876000	9330000	42131000	26697000	0	2.29427e+07	0	14023000	0	4.67433e+06
A0A078G9S1	At3g63540	Thylakoid lumenal 19 kDa protein(P19)	tr|A0A078G9S1|A0A078G9S1_BRANA BnaC03g27090D protein OS=Brassica napus GN=BnaC03g27090D PE=4 SV=1;tr|A0A078D4I1|A0A078D4I1_BRANA BnaA03g22970D protein OS=Brassica napus GN=BnaA03g22970D PE=4 SV=1	25.83	237	7	80018000	91744000	65397000	79053000	220760000	81522000	109720000	137334000	370720000	258790000	197950000	275820000	285020000	231430000	184640000	2.33697e+08	220160000	135810000	135890000	1.63953e+08	201350000	157050000	341640000	2.33347e+08	70650000	69577000	120390000	8.68723e+07	119170000	109980000	106280000	111810000
A0A078JV86	GDH3	Glutamate dehydrogenase	tr|A0A078JV86|A0A078JV86_BRANA Glycine cleavage system H protein (Fragment) OS=Brassica napus GN=BnaAnng37640D PE=3 SV=1;tr|A0A078D4Q0|A0A078D4Q0_BRANA Glycine cleavage system H protein OS=Brassica napus GN=BnaC08g07440D PE=3 SV=1	15.372	141	1	95521000	479980000	0	1.91834e+08	268870000	28322000	0	99064000	1704300000	677950000	194490000	8.58913e+08	0	129890000	322090000	150660000	504080000	0	0	1.68027e+08	108620000	98284000	77065000	9.46563e+07	0	30691000	34642000	2.17777e+07	65620000	0	52104000	3.92413e+07
A0A078D4R9	GSTU6	Glutathione S-transferase U6	tr|A0A078D4R9|A0A078D4R9_BRANA BnaA03g21970D protein OS=Brassica napus GN=BnaA03g21970D PE=4 SV=1;tr|A0A078JWW3|A0A078JWW3_BRANA BnaCnng76180D protein OS=Brassica napus GN=BnaCnng76180D PE=4 SV=1;tr|A0A078I3L9|A0A078I3L9_BRANA BnaA05g12560D protein OS=Bras	25.718	224	5	54007000	331270000	413550000	2.66276e+08	79975000	260880000	215820000	1.85558e+08	90269000	91415000	55984000	7.92227e+07	454410000	89769000	49384000	1.97854e+08	63396000	227900000	398080000	229792000	46923000	151750000	117680000	105451000	1110100000	53921000	101570000	4.21864e+08	250360000	186370000	234090000	2.23607e+08
A0A078FAH6	RPS27AC	Ubiquitin-40S ribosomal protein S27a-3 [Cleaved into: Ubiquitin	tr|A0A078FAH6|A0A078FAH6_BRANA BnaA04g27270D protein OS=Brassica napus GN=BnaA09g39760D PE=4 SV=1;tr|A0A078D4W1|A0A078D4W1_BRANA BnaA03g21620D protein OS=Brassica napus GN=BnaA03g21620D PE=4 SV=1;tr|A0A078GMF0|A0A078GMF0_BRANA BnaA07g09990D protein OS=Bras	17.754	157	4	7573300	0	6705100	4.75947e+06	12246000	10816000	59186000	27416000	7694300	9633700	9995000	9.10767e+06	11794000	2602200	1703200	5.36647e+06	6912300	25491000	0	10801100	1329200	4203300	1415000	2.31583e+06	2517000	143600000	5544300	5.05538e+07	0	0	0	0
A0A078D4Z1	Pap3	Probable plastid-lipid-associated protein 3	tr|A0A078D4Z1|A0A078D4Z1_BRANA BnaC04g09640D protein OS=Brassica napus GN=BnaC04g09640D PE=4 SV=1	39.289	362	2	1473100	2007000	1894300	1.79147e+06	1441700	608800	1225600	1.09203e+06	4179100	3074000	3770100	3674400	1414200	524410	1043900	994170	4089100	2047100	1590200	2.57547e+06	193150	0	0	64383.3	0	0	0	0	1632200	1288200	1275400	1398600
A0A078IB90	ADK1	Adenylate kinase 1	tr|A0A078IB90|A0A078IB90_BRANA BnaCnng15820D protein OS=Brassica napus GN=BnaCnng15820D PE=3 SV=1;tr|A0A078HSI1|A0A078HSI1_BRANA BnaA06g22680D protein OS=Brassica napus GN=BnaA06g22680D PE=3 SV=1;tr|A0A078FVA9|A0A078FVA9_BRANA BnaA09g06550D protein OS=Bras	26.409	240	3	95784000	539090000	414680000	3.49851e+08	44864000	158900000	65916000	8.98933e+07	127570000	20762000	39292000	6.25413e+07	9899800	72384000	35461000	3.92483e+07	71458000	62432000	93292000	7.57273e+07	14328000	130290000	11795000	5.21377e+07	0	12085000	8464100	6849700	13304000	0	21606000	1.16367e+07
A0A078GVC1	CSY4	Citrate synthase 4(EC 2.3.3.16)	tr|A0A078GVC1|A0A078GVC1_BRANA Citrate synthase OS=Brassica napus GN=BnaA04g25660D PE=3 SV=1;tr|A0A078GFM5|A0A078GFM5_BRANA Citrate synthase OS=Brassica napus GN=BnaC04g49560D PE=3 SV=1;tr|A0A078E2T0|A0A078E2T0_BRANA Citrate synthase OS=Brassica napus GN=B	52.761	475	7	22182000	29285000	33073000	28180000	12861000	29989000	16916000	19922000	29478000	32096000	21373000	27649000	20444000	44195000	13272000	2.59703e+07	52042000	49780000	41528000	4.77833e+07	10893000	29293000	6410700	1.55322e+07	0	51428000	42732000	3.13867e+07	95614000	109590000	81454000	9.55527e+07
A0A078H1K3	At2g35040	AICARFT/IMPCHase bienzyme family protein	tr|A0A078H1K3|A0A078H1K3_BRANA BnaA05g08860D protein OS=Brassica napus GN=BnaA05g08860D PE=3 SV=1;tr|A0A078D555|A0A078D555_BRANA BnaC04g10270D protein OS=Brassica napus GN=BnaC04g10270D PE=3 SV=1	64.361	591	3	1163700	1421900	1592400	1.39267e+06	882400	1725600	1387900	1.33197e+06	1804200	1297100	1852400	1.65123e+06	1157600	1211600	0	789733	1535300	1184000	1195600	1.30497e+06	1110500	1560400	1158200	1.27637e+06	0	0	0	0	1229100	0	1245800	824967
P29108	FAB2	Stearoyl-[acyl-carrier-protein] 9-desaturase 7(Stearoyl-ACP desaturase 7) (EC 1.14.19.2)	sp|P29108|STAD_BRANA Stearoyl-[acyl-carrier-protein] 9-desaturase, chloroplastic OS=Brassica napus PE=2 SV=1;tr|A0A078D558|A0A078D558_BRANA Acyl-[acyl-carrier-protein] desaturase OS=Brassica napus GN=BnaA03g20420D PE=3 SV=1;tr|Q6DUV7|Q6DUV7_BRANA Acyl-[acy	45.347	398	1	1289500	2209600	2404300	1967800	18388000	0	29855000	16081000	0	859520	621860	493793	4289100	0	3558600	2615900	3944500	2479000	0	2.14117e+06	0	1615400	63510000	2.17085e+07	155650000	0	78026000	77892000	5285800	7574700	16035000	9.63183e+06
A0A078D5E3	PCMP-H44	Pentatricopeptide repeat-containing protein	tr|A0A078D5E3|A0A078D5E3_BRANA BnaC07g22640D protein OS=Brassica napus GN=BnaC07g22640D PE=4 SV=1;tr|A0A078IB21|A0A078IB21_BRANA BnaA06g33630D protein OS=Brassica napus GN=BnaA06g33630D PE=4 SV=1	28.288	256	1	0	0	0	0	0	1796200	0	598733	0	0	0	0	0	0	0	0	0	978660	0	326220	0	0	0	0	31567000	0	0	1.05223e+07	4978700	40128000	0	1.50356e+07
A0A078D5H5	emb2746	RNA-metabolising metallo-beta-lactamase family protein	tr|A0A078D5H5|A0A078D5H5_BRANA BnaC03g50930D protein OS=Brassica napus GN=BnaC03g50930D PE=4 SV=1;tr|A0A078HV12|A0A078HV12_BRANA BnaA06g22690D protein OS=Brassica napus GN=BnaA06g22690D PE=3 SV=1	98.725	893	1	935700	944600	772800	884413	0	1303100	1429000	910700	0	659350	0	219783	0	0	0	0	0	860910	768060	542990	2772400	1987300	1364900	2.04153e+06	926430	1802100	3849700	2.19274e+06	4348300	4591200	5128600	4.68937e+06
A0A078D5I6	NDPK2	Nucleoside diphosphate kinase II	tr|A0A078D5I6|A0A078D5I6_BRANA Nucleoside diphosphate kinase OS=Brassica napus GN=BnaC03g51050D PE=3 SV=1	25.593	232	1	0	0	9194500	3.06483e+06	7510500	13319000	0	6.94317e+06	0	13924000	0	4.64133e+06	0	0	0	0	0	0	0	0	0	0	0	0	0	6984500	0	2.32817e+06	7909200	8672500	0	5.52723e+06
A0A078DIP6	MBK5.9	GroES-like zinc-binding alcohol dehydrogenase family protein	tr|A0A078DIP6|A0A078DIP6_BRANA BnaA04g01160D protein OS=Brassica napus GN=BnaA04g01160D PE=4 SV=1;tr|A0A078HW01|A0A078HW01_BRANA BnaA06g22770D protein OS=Brassica napus GN=BnaA06g22770D PE=4 SV=1;tr|A0A078D5J5|A0A078D5J5_BRANA BnaC03g50730D protein OS=Bras	23.848	228	1	0	0	0	0	0	0	0	0	0	0	0	0	0	0	0	0	0	0	0	0	0	0	0	0	0	0	0	0	1043700	0	0	347900
A0A078D5M3	HISN8	Histidinol dehydrogenase, chloroplastic	tr|A0A078D5M3|A0A078D5M3_BRANA Histidinol dehydrogenase, chloroplastic OS=Brassica napus GN=BnaC03g50430D PE=3 SV=1;tr|A0A078I101|A0A078I101_BRANA Histidinol dehydrogenase, chloroplastic OS=Brassica napus GN=BnaA06g23030D PE=3 SV=1;tr|A0A078CYY2|A0A078CYY2	50.891	469	1	632200	0	943400	525233	0	0	2537400	845800	1731300	0	1266600	999300	3975900	1886300	820320	2.22751e+06	3958700	0	4698300	2.88567e+06	0	36913000	0	1.23043e+07	197080000	6277400	3591600	68983000	6766500	6419800	11544000	8.24343e+06
A0A078H8M5	PBB1	N-terminal nucleophile aminohydrolases (Ntn hydrolases) superfamily protein	tr|A0A078H8M5|A0A078H8M5_BRANA Proteasome subunit beta type OS=Brassica napus GN=BnaA02g28940D PE=3 SV=1;tr|A0A078ETP2|A0A078ETP2_BRANA BnaC02g36840D protein OS=Brassica napus GN=BnaC02g36840D PE=4 SV=1;tr|A0A078D5T6|A0A078D5T6_BRANA BnaC07g24340D protein	29.605	273	1	0	0	0	0	0	123800000	132700000	85500000	0	0	0	0	0	2105400	0	701800	0	0	0	0	7984100	0	0	2.66137e+06	0	0	0	0	7308700	0	0	2.43623e+06
A0A078JHS9	AHA2	ATPase 2, plasma membrane-type (EC 3.6.3.6) (Proton pump 2)	tr|A0A078JHS9|A0A078JHS9_BRANA Plasma membrane ATPase OS=Brassica napus GN=BnaAnng23670D PE=3 SV=1;tr|A0A078GSP9|A0A078GSP9_BRANA Plasma membrane ATPase OS=Brassica napus GN=BnaA01g06820D PE=3 SV=1;tr|A0A078D5U5|A0A078D5U5_BRANA Plasma membrane ATPase OS=B	101	918	1	639100	805500	0	481583	0	712840	272300	328380	0	0	0	0	6876900	26897000	18247000	17340300	0	5213500	2258900	2490800	0	0	0	0	37462000	8281500	47541000	3.10948e+07	63479000	60879000	64774000	63044000
A0A078D5V6	FKBP12	Peptidyl-prolyl cis-trans isomerase	tr|A0A078D5V6|A0A078D5V6_BRANA Peptidylprolyl isomerase OS=Brassica napus GN=BnaC03g49830D PE=4 SV=1;tr|A0A078FZT9|A0A078FZT9_BRANA Peptidylprolyl isomerase OS=Brassica napus GN=BnaA09g06810D PE=4 SV=1;tr|A0A078IC29|A0A078IC29_BRANA Peptidylprolyl isomeras	11.886	112	2	10756000	28540000	13507000	17601000	17403000	10584000	11106000	13031000	19765000	22095000	17042000	19634000	3640200	1348800	0	1663000	9904000	5120900	6292600	7.10583e+06	972730	687750	1526600	1062360	0	3977200	4131900	2.70303e+06	9025700	3526100	19175000	10575600
A0A078ISK0	At1g15140	F9L1.8 protein	tr|A0A078ISK0|A0A078ISK0_BRANA BnaA08g31310D protein OS=Brassica napus GN=BnaA08g31310D PE=4 SV=1;tr|A0A078D6J7|A0A078D6J7_BRANA BnaC08g16510D protein OS=Brassica napus GN=BnaC08g16510D PE=4 SV=1	32.446	300	4	448220000	0	332150000	2.60123e+08	463080000	219780000	524020000	4.02293e+08	209680000	232580000	370620000	270960000	193860000	397040000	143170000	244690000	32208000	292700000	516900000	2.80603e+08	0	0	685000000	2.28333e+08	0	0	638000000	2.12667e+08	0	0	0	0
A0A078IXH0	CCT5	T-complex protein 1 subunit epsilon	tr|A0A078IXH0|A0A078IXH0_BRANA BnaC03g75860D protein OS=Brassica napus GN=BnaC03g75860D PE=3 SV=1;tr|A0A078HH02|A0A078HH02_BRANA BnaA08g19100D protein OS=Brassica napus GN=BnaA08g19100D PE=3 SV=1;tr|A0A078ERK3|A0A078ERK3_BRANA BnaC07g11060D protein OS=Bras	59.374	535	2	14662000	22327000	14991000	1.73267e+07	0	14298000	13277000	9.19167e+06	0	0	0	0	12765000	0	0	4255000	0	0	0	0	12801000	0	11342000	8.04767e+06	0	39299000	20890000	20063000	38781000	0	35127000	24636000
A0A078GQI8	NTF2A	Nuclear transport factor 2A (AtNTF2a) [Cleaved into: Nuclear transport factor 2A, N-terminally processed]	tr|A0A078GQI8|A0A078GQI8_BRANA BnaA09g28010D protein OS=Brassica napus GN=BnaA09g28010D PE=4 SV=1;tr|A0A078FRE7|A0A078FRE7_BRANA BnaA07g08920D protein OS=Brassica napus GN=BnaA07g08920D PE=4 SV=1;tr|A0A078EWI0|A0A078EWI0_BRANA BnaC07g11330D protein OS=Bras	13.547	122	1	4849200	11159000	7985000	7.99773e+06	7517600	7652900	8542800	7.90443e+06	29365000	12528000	19688000	20527000	0	0	0	0	14553000	11597000	8344100	1.1498e+07	9695700	12833000	0	7.50957e+06	0	0	9286000	3.09533e+06	7207700	7173200	8714600	7698500
A0A078D737	PAP6	Plastid-lipid-associated protein 6	tr|A0A078D737|A0A078D737_BRANA BnaC07g08100D protein OS=Brassica napus GN=BnaC07g08100D PE=4 SV=1	29.502	273	2	22445000	0	8008800	1.01513e+07	10428000	20709000	59943000	30360000	11596000	23274000	11176000	1.53487e+07	32800000	335430000	131110000	1.66447e+08	58120000	47527000	0	3.52157e+07	83511000	42163000	0	4.18913e+07	0	27581000	0	9.19367e+06	12679000	7949900	28296000	16308300
A0A078IVG9	F1P2.200	DnaJ/Hsp40 cysteine-rich domain superfamily protein	tr|A0A078IVG9|A0A078IVG9_BRANA BnaC01g42740D protein OS=Brassica napus GN=BnaC01g42740D PE=4 SV=1;tr|A0A078D741|A0A078D741_BRANA BnaA01g20230D protein OS=Brassica napus GN=BnaA01g20230D PE=4 SV=1	14.363	135	3	6959600	1475200	4055300	4.16337e+06	9099800	10386000	10938000	1.01413e+07	2723100	4646200	1952000	3107100	0	912000	7999900	2.97063e+06	3641500	0	9584400	4.40863e+06	3775100	5545900	0	3107000	0	9559000	17498000	9019000	6506300	3587100	0	3.36447e+06
Q6RJS1	ELF5A-2	Eukaryotic translation initiation factor 5A-2	tr|Q6RJS1|Q6RJS1_BRANA Eukaryotic translation initiation factor 5A OS=Brassica napus PE=2 SV=1;tr|A0A078J5E7|A0A078J5E7_BRANA Eukaryotic translation initiation factor 5A OS=Brassica napus GN=BnaA08g19830D PE=3 SV=1;tr|A0A078D7G6|A0A078D7G6_BRANA Eukaryotic	17.097	159	1	0	0	0	0	0	0	0	0	42041000	20957000	27950000	30316000	0	0	0	0	0	201690000	80253000	93981000	0	0	0	0	0	24624000	20019000	14881000	0	43585000	0	1.45283e+07
A0A078J330	DXR	1-deoxy-D-xylulose 5-phosphate reductoisomerase	tr|A0A078J330|A0A078J330_BRANA BnaC09g50930D protein OS=Brassica napus GN=BnaC09g50930D PE=3 SV=1;tr|A0A078EGT0|A0A078EGT0_BRANA BnaA06g22280D protein OS=Brassica napus GN=BnaA06g22280D PE=3 SV=1;tr|A0A078D7I8|A0A078D7I8_BRANA BnaC03g51460D protein OS=Bras	51.57	475	6	0	18708000	0	6236000	16104000	16223000	38814000	2.37137e+07	0	0	0	0	0	13900000	0	4.63333e+06	56908000	59929000	0	3.89457e+07	15143000	23727000	10521000	1.64637e+07	0	190030000	75565000	8.85317e+07	13990000	23745000	11455000	1.63967e+07
A0A078D7M7	MCA23.20	Gut esterase	tr|A0A078D7M7|A0A078D7M7_BRANA BnaC07g26220D protein OS=Brassica napus GN=BnaC07g26220D PE=4 SV=1	47.738	431	1	610000	908800	1315900	944907	540570	359660	0	300077	2053000	0	1811700	1.28823e+06	2422900	2153400	1362300	1.97953e+06	2600500	2419800	1387500	2.13593e+06	1455400	1737000	1441400	1544600	0	0	0	0	3064100	3000800	10518000	5.52763e+06
A0A078JRE0	GAMMACAL2	Gamma carbonic anhydrase-like 2(AtCAL2) (GAMMA CAL2)	tr|A0A078JRE0|A0A078JRE0_BRANA BnaA06g39160D protein OS=Brassica napus GN=BnaA06g39160D PE=4 SV=1;tr|A0A078FQH2|A0A078FQH2_BRANA BnaA09g06620D protein OS=Brassica napus GN=BnaA09g06620D PE=4 SV=1;tr|A0A078D7S7|A0A078D7S7_BRANA BnaC03g50760D protein OS=Bras	27.556	252	4	9023300	13487000	0	7.50343e+06	10776000	7274100	11928000	9992700	40375000	0	16841000	19072000	7465900	8791400	3110200	6.45583e+06	15709000	13115000	9186900	12670300	12346300	12676500	11028600	1.20171e+07	0	10109000	11338000	7149000	42170000	35916000	50145000	4.27437e+07
A0A078I2F0	OVA3	Glutamate--tRNA ligase (EC 6.1.1.17)	tr|A0A078I2F0|A0A078I2F0_BRANA BnaA06g23200D protein OS=Brassica napus GN=BnaA06g23200D PE=3 SV=1;tr|A0A078D819|A0A078D819_BRANA BnaC03g50160D protein OS=Brassica napus GN=BnaC03g50160D PE=3 SV=1	62.641	566	1	0	55297000	0	1.84323e+07	102780000	0	0	34260000	51370000	0	44033000	31801000	0	0	22134000	7378000	0	15530000	0	5.17667e+06	42787000	41392000	48665000	4.42813e+07	0	0	0	0	35023000	0	0	1.16743e+07
A0A078D820	MS2	5-methyltetrahydropteroyltriglutamate--homocysteine methyltransferase 2	tr|A0A078D820|A0A078D820_BRANA BnaA02g03770D protein OS=Brassica napus GN=BnaA02g03770D PE=3 SV=1;tr|A0A078IL69|A0A078IL69_BRANA BnaC05g48040D protein OS=Brassica napus GN=BnaC05g48040D PE=3 SV=1	84.517	765	3	10675000	7616300	8643000	8978100	19170000	20040000	57253000	3.21543e+07	29245000	12238000	27746000	2.30763e+07	34547000	23002000	26416000	2.79883e+07	10247000	7551400	11808000	9868800	0	0	0	0	3563800000	14494000	48506000	1.20893e+09	18373000	22895000	28300000	2.31893e+07
A0A078DD84	CRRSP55	Cysteine-rich repeat secretory protein 55	tr|A0A078DD84|A0A078DD84_BRANA BnaA06g30160D protein OS=Brassica napus GN=BnaA06g30160D PE=4 SV=1;tr|A0A078D831|A0A078D831_BRANA BnaC07g26560D protein OS=Brassica napus GN=BnaC07g26560D PE=4 SV=1	28.714	261	2	24696000	17039000	0	1.39117e+07	10232000	9157200	2753000	7.38073e+06	0	0	0	0	0	0	0	0	40390000	0	0	1.34633e+07	6227600	7032800	7701800	6987400	0	0	9560000	3.18667e+06	79929000	0	25203000	35044000
A0A078D876	BXL1	Beta-D-xylosidase 1	tr|A0A078D876|A0A078D876_BRANA BnaC07g27160D protein OS=Brassica napus GN=BnaC07g27160D PE=4 SV=1	83.462	772	1	0	0	0	0	0	0	0	0	0	9848400	0	3282800	8337200	0	0	2.77907e+06	0	0	5686100	1.89537e+06	0	0	1898000	632667	0	0	0	0	0	0	0	0
A0A078D890			tr|A0A078D890|A0A078D890_BRANA BnaC07g26380D protein OS=Brassica napus GN=BnaC07g26380D PE=4 SV=1	20.647	183	1	0	0	0	0	0	38741000	21838000	20193000	0	0	0	0	0	0	0	0	0	0	0	0	0	0	0	0	0	0	0	0	0	0	0	0
A0A078D8F6	TIC40	Protein TIC 40	tr|A0A078D8F6|A0A078D8F6_BRANA BnaA02g03180D protein OS=Brassica napus GN=BnaA02g03180D PE=4 SV=1;tr|A0A078HMR6|A0A078HMR6_BRANA BnaC02g06750D protein OS=Brassica napus GN=BnaC02g06750D PE=4 SV=1;tr|A0A078C321|A0A078C321_BRANA BnaA10g17870D protein OS=Bras	49.151	450	2	0	942870	1063800	668890	762760	637650	876220	758877	0	774680	0	258227	602600	0	320850	307817	1019100	650300	0	556467	0	0	0	0	0	573300	0	191100	592040	626180	0	406073
A0A078D8H8	At5g49510	Probable prefoldin subunit 3	tr|A0A078D8H8|A0A078D8H8_BRANA Prefoldin subunit 3 OS=Brassica napus GN=BnaC07g27230D PE=3 SV=1;tr|A0A078II02|A0A078II02_BRANA Prefoldin subunit 3 OS=Brassica napus GN=BnaA09g03370D PE=3 SV=1;tr|A0A078EL14|A0A078EL14_BRANA BnaC09g02730D protein OS=Brassica	21.423	195	1	0	1585100	0	528367	0	665940	1069900	578613	2641500	2059700	3385000	2695400	1074000	862950	755360	897437	1438200	0	816680	751627	758730	476030	592900	609220	0	0	1112100	370700	1880300	1706900	1865000	1817400
A0A078D8J7	VDAC3	Mitochondrial outer membrane protein porin 3	tr|A0A078D8J7|A0A078D8J7_BRANA BnaA02g02470D protein OS=Brassica napus GN=BnaA02g02470D PE=4 SV=1	29.389	276	4	11899000	0	14775000	8.89133e+06	7782200	34589000	103440000	4.86037e+07	12345000	30433000	10612000	1.77967e+07	67830000	59639000	65826000	6.44317e+07	11670000	0	0	3890000	162200000	155440000	80271000	132637000	8965800	64139000	150090000	7.43983e+07	40027000	0	44979000	2.83353e+07
A0A078IG44	SDH2-2	Succinate dehydrogenase [ubiquinone] iron-sulfur subunit(EC 1.3.5.1)	tr|A0A078IG44|A0A078IG44_BRANA Succinate dehydrogenase [ubiquinone] iron-sulfur subunit, mitochondrial OS=Brassica napus GN=BnaCnng16210D PE=3 SV=1;tr|A0A078G3Y1|A0A078G3Y1_BRANA Succinate dehydrogenase [ubiquinone] iron-sulfur subunit, mitochondrial OS=Br	22.744	200	1	41005000	52660000	0	3.12217e+07	0	16260000	0	5420000	0	0	0	0	36432000	0	17539000	1.79903e+07	40496000	32122000	0	24206000	20267500	20263210	21233000	2.05879e+07	0	0	0	0	0	0	0	0
A0A078DP01	At5g15910	NAD(P)-binding Rossmann-fold superfamily protein	tr|A0A078DP01|A0A078DP01_BRANA BnaC02g06320D protein OS=Brassica napus GN=BnaC02g06320D PE=4 SV=1;tr|A0A078D8P5|A0A078D8P5_BRANA BnaA02g02880D protein OS=Brassica napus GN=BnaA02g02880D PE=4 SV=1	28.751	271	1	0	0	0	0	0	0	0	0	0	0	0	0	0	0	0	0	0	0	0	0	7661800	11443000	6657400	8587400	80944000	0	10230000	3.03913e+07	17222000	21720000	0	1.29807e+07
A0A078F9T8	MPT3	Mitochondrial phosphate carrier protein 3(Mitochondrial phosphate transporter 3)	tr|A0A078F9T8|A0A078F9T8_BRANA BnaA10g19590D protein OS=Brassica napus GN=BnaC09g43140D PE=3 SV=1;tr|A0A078D8V5|A0A078D8V5_BRANA BnaA02g01980D protein OS=Brassica napus GN=BnaA02g01980D PE=3 SV=1;tr|A0A078DP80|A0A078DP80_BRANA BnaC02g05120D protein OS=Bras	30.035	280	4	0	0	0	0	0	9304800	0	3101600	0	0	0	0	28251000	10763000	25847000	2.16203e+07	0	0	4200900	1400300	1401000	1654300	1222300	1.42587e+06	0	0	29103000	9701000	148710000	26006000	48793000	74503000
A0A078D9A1	HSP70-10	Heat shock 70 kDa protein 10	tr|A0A078D9A1|A0A078D9A1_BRANA BnaA02g00030D protein OS=Brassica napus GN=BnaA02g00030D PE=3 SV=1;tr|A0A078I415|A0A078I415_BRANA BnaC02g00800D protein OS=Brassica napus GN=BnaC02g00800D PE=3 SV=1	72.913	680	1	408910	2161000	715610	1.09517e+06	0	183280	0	61093.3	652840	847020	743070	747643	295300	206530	232090	244640	645670	584540	498590	576267	98500	151790	0	83430	0	0	253320	84440	3083700	2858700	3350200	3.09753e+06
A0A078F4A0	At1g21680	DPP6 N-terminal domain-like protein	tr|A0A078F4A0|A0A078F4A0_BRANA BnaA06g15400D protein OS=Brassica napus GN=BnaA06g15400D PE=4 SV=1;tr|A0A078D9T5|A0A078D9T5_BRANA BnaC08g07650D protein OS=Brassica napus GN=BnaC08g07650D PE=4 SV=1;tr|A0A078EUL7|A0A078EUL7_BRANA BnaC05g17000D protein OS=Bras	73.992	667	2	3672900	9125100	9386900	7.39497e+06	4571100	24135000	2598200	1.04348e+07	3579500	9975800	5714400	6.42323e+06	0	0	0	0	14954000	13198000	15576000	14576000	35386000	27617000	20109000	27704000	346730000	47862000	1892100	1.32161e+08	9553100	13583000	59068000	2.74014e+07
A0A078D9T6	ALDH10A8	Betaine aldehyde dehydrogenase 1	tr|A0A078D9T6|A0A078D9T6_BRANA BnaC06g22720D protein OS=Brassica napus GN=BnaC06g22720D PE=3 SV=1	54.629	502	2	0	0	0	0	0	5805500	0	1.93517e+06	0	0	0	0	0	0	0	0	0	0	0	0	0	0	0	0	0	0	0	0	0	0	0	0
A0A078D9U9	At1g32060	Phosphoribulokinase	tr|A0A078D9U9|A0A078D9U9_BRANA Phosphoribulokinase OS=Brassica napus GN=BnaC08g07850D PE=3 SV=1	44.93	401	1	0	0	56169000	18723000	0	66214000	55466000	40560000	0	0	0	0	0	0	23715000	7905000	113730000	0	69883000	6.12043e+07	103020000	0	0	34340000	139220000	0	138040000	92420000	0	0	62797000	2.09323e+07
A0A078DAB3	At5g28840	GDP-mannose 3,5-epimerase GDP-Man 3,5-epimerase	tr|A0A078DAB3|A0A078DAB3_BRANA BnaA06g29280D protein OS=Brassica napus GN=BnaA06g29280D PE=4 SV=1;tr|A0A078IF83|A0A078IF83_BRANA BnaC07g27420D protein OS=Brassica napus GN=BnaC07g27420D PE=4 SV=1;tr|A0A078EXA5|A0A078EXA5_BRANA BnaC02g39300D protein OS=Bras	48.698	430	10	473100000	692400000	333060000	499520000	393280000	128450000	668060000	3.96597e+08	218730000	97478000	162740000	1.59649e+08	195310000	7355300	225760000	1.42808e+08	57529000	135010000	86555000	9.30313e+07	1100600000	516650000	863650000	8.26967e+08	26128000	75176000	895860000	332388000	207970000	304280000	644470000	3.85573e+08
A0A078DAH7	SUS2	Sucrose synthase 2	tr|A0A078DAH7|A0A078DAH7_BRANA Sucrose synthase OS=Brassica napus GN=BnaA06g29670D PE=3 SV=1;tr|A0A078DDM7|A0A078DDM7_BRANA Sucrose synthase OS=Brassica napus GN=BnaC07g27090D PE=3 SV=1	89.55	788	1	32371000	52256000	74995000	5.32073e+07	32113000	49426000	73060000	51533000	76736000	91377000	71426000	7.98463e+07	35626000	0	24419000	20015000	0	35142000	0	11714000	0	0	0	0	0	18827000	22217000	1.36813e+07	0	22235000	10548000	1.09277e+07
A0A078DAM4	At5g48480	Uncharacterized protein	tr|A0A078DAM4|A0A078DAM4_BRANA BnaC07g26500D protein OS=Brassica napus GN=BnaC07g26500D PE=4 SV=1	17.351	166	2	586410	0	1255500	613970	4712200	15925000	50242000	23626400	417660	0	1379300	598987	0	0	0	0	4149500	490170	571220	1.73696e+06	6529200	6757800	0	4429000	3044400	470230	7817700	3.77744e+06	3437400	11478000	0	4971800
A0A078DAN5	FKBP15-2	Peptidyl-prolyl cis-trans isomerase	tr|A0A078DAN5|A0A078DAN5_BRANA Peptidylprolyl isomerase OS=Brassica napus GN=BnaC07g26600D PE=4 SV=1;tr|A0A078EYM1|A0A078EYM1_BRANA Peptidylprolyl isomerase OS=Brassica napus GN=BnaC02g38680D PE=4 SV=1;tr|A0A078DD81|A0A078DD81_BRANA Peptidylprolyl isomeras	17.433	160	2	18458000	0	0	6.15267e+06	4138800	0	20333000	8.15727e+06	16257000	0	0	5419000	0	0	0	0	3586900	0	0	1.19563e+06	0	0	0	0	0	0	1896300	632100	0	0	0	0
A0A078EDI6	TUBB3	Tubulin beta-3 chain	tr|A0A078EDI6|A0A078EDI6_BRANA Tubulin beta chain OS=Brassica napus GN=BnaA06g17780D PE=3 SV=1;tr|A0A078DAQ0|A0A078DAQ0_BRANA Tubulin beta chain OS=Brassica napus GN=BnaC03g56170D PE=3 SV=1;tr|A0A078JHJ5|A0A078JHJ5_BRANA Tubulin beta chain (Fragment) OS=Br	48.251	427	2	7922700	0	3337000	3.75323e+06	95710000	91201000	138220000	108377000	1830600	0	1656700	1.16243e+06	0	0	0	0	10617000	0	9902700	6839900	5194000	0	0	1.73133e+06	0	4917100	0	1.63903e+06	1042200	2636400	3249300	2309300
A0A078EE37	F13I12.120	Thylakoid soluble phosphoprotein	tr|A0A078EE37|A0A078EE37_BRANA BnaA06g17600D protein OS=Brassica napus GN=BnaA06g17600D PE=4 SV=1;tr|A0A078DAR4|A0A078DAR4_BRANA BnaC03g56370D protein OS=Brassica napus GN=BnaC03g56370D PE=4 SV=1	10.889	104	4	89832000	95934000	263260000	1.49675e+08	79926000	364880000	71584000	172130000	22607000	66714000	36040000	41787000	438480000	435830000	250840000	375050000	128910000	337060000	406010000	290660000	98657000	560930000	801800000	487129000	2914200000	94465000	113300000	1040655000	195160000	95846000	136610000	1.42539e+08
A0A078DB19	RPL12A	50S ribosomal protein L12-1	tr|A0A078DB19|A0A078DB19_BRANA BnaA06g31830D protein OS=Brassica napus GN=BnaA06g31830D PE=3 SV=1;tr|A0A078I5M1|A0A078I5M1_BRANA BnaC07g24760D protein OS=Brassica napus GN=BnaC07g24760D PE=3 SV=1;tr|A0A078DBR1|A0A078DBR1_BRANA BnaA06g31840D protein OS=Bras	19.802	189	2	358890000	283870000	474790000	3.72517e+08	922060000	690260000	1458200000	1.02351e+09	556840000	844510000	412640000	6.04663e+08	164460000	249930000	819590000	4.11327e+08	698860000	376550000	190210000	4.21873e+08	147170000	228690000	429900000	2.68587e+08	6807200	1530100000	345280000	6.27396e+08	683770000	329140000	617820000	5.43577e+08
A0A078DB31	DEGP1	Protease Do-like 1	tr|A0A078DB31|A0A078DB31_BRANA BnaA06g31770D protein OS=Brassica napus GN=BnaA06g31770D PE=4 SV=1;tr|A0A078J0A3|A0A078J0A3_BRANA BnaCnng33260D protein OS=Brassica napus GN=BnaCnng33260D PE=4 SV=1	46.327	438	6	60191000	51854000	52377000	5.48073e+07	24477000	21250000	17328000	2.10183e+07	92938000	12361000	44610000	4.99697e+07	119030000	116460000	26293000	87261000	47026000	93296000	40256000	6.01927e+07	64939000	145210000	86707000	98952000	0	43934000	34113000	2.60157e+07	111620000	134770000	113370000	119920000
A0A078DB51	RANBP1C	Ran-binding protein 1 homolog c	tr|A0A078DB51|A0A078DB51_BRANA BnaC08g02020D protein OS=Brassica napus GN=BnaC08g02020D PE=4 SV=1;tr|A0A078F1E1|A0A078F1E1_BRANA BnaA10g04580D protein OS=Brassica napus GN=BnaA10g04580D PE=4 SV=1;tr|A0A078FRU6|A0A078FRU6_BRANA BnaA08g28880D protein OS=Bras	5.0185	43	1	0	132790000	180850000	1.04547e+08	80893000	0	0	2.69643e+07	0	105260000	0	3.50867e+07	0	0	0	0	0	0	0	0	75875000	0	0	2.52917e+07	0	0	0	0	0	105140000	0	3.50467e+07
A0A078JRK0	At1g07450	Tropinone reductase	tr|A0A078JRK0|A0A078JRK0_BRANA BnaAnng26060D protein OS=Brassica napus GN=BnaAnng26060D PE=4 SV=1;tr|A0A078DB54|A0A078DB54_BRANA BnaC08g02180D protein OS=Brassica napus GN=BnaC08g02180D PE=4 SV=1	28.279	262	1	0	1939700	3966400	1968700	0	0	7416100	2.47203e+06	0	0	0	0	0	0	0	0	0	0	0	0	13231000	0	0	4.41033e+06	9336500	0	0	3.11217e+06	22981000	0	0	7.66033e+06
A0A078DRE2	WER	Transcription factor	tr|A0A078DRE2|A0A078DRE2_BRANA Carbonic anhydrase OS=Brassica napus GN=BnaC02g05730D PE=3 SV=1;tr|A0A078DB96|A0A078DB96_BRANA Carbonic anhydrase OS=Brassica napus GN=BnaA02g02290D PE=3 SV=1	28.334	259	10	759290000	968160000	1170000000	9.65817e+08	276080000	1412400000	1927500000	1.20533e+09	1178100000	427990000	1230000000	9.45363e+08	2980700000	2125200000	1186200000	2.09737e+09	1087300000	512750000	747790000	7.82613e+08	1649600000	1605500000	1735200000	1.66343e+09	14486000	2123500000	3205500000	1781162000	1081100000	1186000000	1174400000	1.14717e+09
A0A078DBA5	PSBP1	Oxygen-evolving enhancer protein 2-1	tr|A0A078DBA5|A0A078DBA5_BRANA BnaC08g01880D protein OS=Brassica napus GN=BnaC08g01880D PE=4 SV=1	27.943	261	1	0	0	54988000	1.83293e+07	0	156170000	80902000	79024000	30232000	52929000	58073000	47078000	449500000	137250000	4778600	197176200	58184000	0	60812000	3.96653e+07	98132000	146920000	111970000	1.19007e+08	16269000	69149000	12630000	3.26827e+07	56792000	63927000	42177000	5.42987e+07
A0A078DBD1	PHS1	Alpha-glucan phosphorylase 1	tr|A0A078DBD1|A0A078DBD1_BRANA Alpha-1,4 glucan phosphorylase OS=Brassica napus GN=BnaA06g30890D PE=3 SV=1	108.34	960	1	1574600	1573400	1146400	1.43147e+06	442600	534370	602200	526390	484060	498000	407860	463307	610620	323810	0	311477	463770	0	294720	252830	2591500	848680	1256800	1565660	0	2462900	2865200	1.77603e+06	617210	429400	418700	488437
A0A078HR24	CBSX3	CBS domain-containing protein CBSX3, mitochondrial	tr|A0A078HR24|A0A078HR24_BRANA BnaC02g00040D protein OS=Brassica napus GN=BnaC02g00040D PE=4 SV=1;tr|A0A078DBN3|A0A078DBN3_BRANA BnaA02g00740D protein OS=Brassica napus GN=BnaA02g00740D PE=4 SV=1	22.716	206	1	17417000	0	0	5.80567e+06	13651000	7180700	0	6943900	0	0	0	0	0	0	8112400	2.70413e+06	0	0	0	0	20633000	18246000	0	1.29597e+07	52045000	0	0	1.73483e+07	0	0	166920000	55640000
A0A078FMN3	PYD2	Dihydrolipoamide acetyltransferase	tr|A0A078HQY8|A0A078HQY8_BRANA Dihydrolipoamide acetyltransferase OS=Brassica napus GN=BnaC09g21610D PE=3 SV=1;tr|A0A078D8E9|A0A078D8E9_BRANA Dihydrolipoamide acetyltransferase	48.944	472	3	8920200	6177300	5849300	6.98227e+06	3319300	3497000	2272100	3.02947e+06	2805400	3456800	3389000	3.21707e+06	869900	589900	601300	687033	1389000	1728400	1827700	1.64837e+06	590400	679300	540900	603533	15192800	9105000	10009100	1.14356e+07	1578200	1900900	1877400	1785500
A0A078FM43	RPS15A	40S ribosomal protein S15-1	tr|A0A078FM43|A0A078FM43_BRANA BnaA08g27790D protein OS=Brassica napus GN=BnaA08g27790D PE=3 SV=1;tr|A0A078DBP5|A0A078DBP5_BRANA BnaC08g00580D protein OS=Brassica napus GN=BnaC08g00580D PE=3 SV=1;tr|A0A078FUU2|A0A078FUU2_BRANA BnaC05g02380D protein OS=Bras	18.244	162	2	15464000	0	24684000	1.33827e+07	32248000	42785000	40498000	3.85103e+07	7248400	4604900	17248000	9.70043e+06	0	0	0	0	58188000	7727900	3086900	2.30009e+07	84539000	40082000	30841000	5.18207e+07	0	21694000	73048000	3.15807e+07	31924000	10310000	17686000	1.99733e+07
A0A078DCL3	At1g22440	Alcohol dehydrogenase-like 2 (EC 1.1.1.1)	tr|A0A078DCL3|A0A078DCL3_BRANA BnaA09g22020D protein OS=Brassica napus GN=BnaA09g22020D PE=3 SV=1;tr|A0A078DC20|A0A078DC20_BRANA BnaA09g22010D protein OS=Brassica napus GN=BnaA09g22010D PE=3 SV=1	15.587	141	1	0	0	0	0	0	0	0	0	0	0	0	0	0	0	0	0	0	0	0	0	0	0	0	0	637710000	0	19945000	2.19218e+08	0	0	0	0
A0A078DC37	NDK4	Nucleoside diphosphate kinase IV	tr|A0A078DC37|A0A078DC37_BRANA Nucleoside diphosphate kinase OS=Brassica napus GN=BnaA09g22160D PE=3 SV=1	25.627	236	1	0	1709300	0	569767	27613000	19240000	6537500	1.77968e+07	3498300	5954000	3399200	4.28383e+06	2410200	1398400	0	1.26953e+06	1800000	2574800	5128700	3.16783e+06	0	7318600	1218200	2845600	0	2656500	0	885500	0	0	19336000	6.44533e+06
A0A078DC56	TIM8	Mitochondrial import inner membrane translocase subunit TIM8	tr|A0A078DC56|A0A078DC56_BRANA BnaA03g13520D protein OS=Brassica napus GN=BnaA03g13520D PE=3 SV=1	8.669	76	1	1194300	1223600	2688800	1.70223e+06	0	1008800	1115700	708167	6473200	660550	4945400	4.02638e+06	591740	314100	0	301947	1942200	1918400	186130	1348910	401320	131770	362060	298383	0	0	362050	120683	1650600	1576400	1373000	1.53333e+06
A0A078DC67	CLPC1	Chaperone protein ClpC1	tr|A0A078DC67|A0A078DC67_BRANA BnaA03g13420D protein OS=Brassica napus GN=BnaA03g13420D PE=3 SV=1;tr|A0A078I4J7|A0A078I4J7_BRANA BnaC03g16230D protein OS=Brassica napus GN=BnaC03g16230D PE=3 SV=1;sp|P46523|CLPA_BRANA ATP-dependent Clp protease ATP-binding	92.155	827	8	79181000	67854000	259490000	1.35508e+08	109510000	271940000	373500000	251650000	124150000	951020000	736160000	6.03777e+08	156470000	160620000	194850000	1.70647e+08	156710000	330460000	114250000	2.00473e+08	117140000	193370000	136580000	149030000	2443400000	161660000	173340000	9.26133e+08	273610000	324800000	333940000	3.10783e+08
A0A078GZG0	At4g10480	Nascent polypeptide-associated complex (NAC), alpha subunit family protein	tr|A0A078GZG0|A0A078GZG0_BRANA BnaC07g15050D protein OS=Brassica napus GN=BnaC07g15050D PE=4 SV=1;tr|A0A078EVW9|A0A078EVW9_BRANA BnaC03g29000D protein OS=Brassica napus GN=BnaC03g29000D PE=4 SV=1;tr|A0A078EKS5|A0A078EKS5_BRANA BnaA07g11170D protein OS=Bras	14.778	137	2	7556400	13597000	25832000	15661800	2765500	11347000	13490000	9.20083e+06	36130000	25477000	35226000	3.22777e+07	3561100	2023600	1626100	2403600	0	8029900	5153300	4394400	7703300	4916500	5779400	6.13307e+06	0	10413000	15464000	8.62567e+06	18208000	15272000	13556000	1.56787e+07
A0A078EE81	HSP17.4A	17.4 kDa class I heat shock protein	tr|A0A078EE81|A0A078EE81_BRANA BnaA06g18100D protein OS=Brassica napus GN=BnaA06g18100D PE=3 SV=1;tr|A0A078DCM0|A0A078DCM0_BRANA BnaC03g55840D protein OS=Brassica napus GN=BnaC03g55840D PE=3 SV=1	17.623	157	3	26597000	124170000	215790000	1.22186e+08	0	0	16980000	5660000	0	4261300	0	1.42043e+06	0	0	3979900	1.32663e+06	0	19802000	7709900	9.17063e+06	8357600	2789700	0	3.71577e+06	0	0	0	0	0	9625900	15050000	8225300
A0A078EAG1	PHS2	Alpha-glucan phosphorylase 2	tr|A0A078EAG1|A0A078EAG1_BRANA Alpha-1,4 glucan phosphorylase OS=Brassica napus GN=BnaA06g17710D PE=3 SV=1;tr|A0A078DCP7|A0A078DCP7_BRANA Alpha-1,4 glucan phosphorylase OS=Brassica napus GN=BnaC03g56240D PE=3 SV=1	95.298	841	14	267070000	140590000	309880000	239180000	69872000	46155000	293650000	136559000	113660000	264920000	60779000	146453000	92374000	243820000	177720000	1.71305e+08	787870000	497050000	447800000	5.77573e+08	176630000	187430000	300980000	221680000	966470000	224930000	256620000	4.82673e+08	675050000	228180000	445930000	449720000
A0A078G4X5	At5g26710	Glutamate--tRNA ligase (EC 6.1.1.17)	tr|A0A078G4X5|A0A078G4X5_BRANA BnaA09g04160D protein OS=Brassica napus GN=BnaA09g04160D PE=3 SV=1;tr|A0A078EVM2|A0A078EVM2_BRANA BnaC02g40340D protein OS=Brassica napus GN=BnaC02g40340D PE=3 SV=1;tr|A0A078EU04|A0A078EU04_BRANA BnaA02g31710D protein OS=Bras	81.471	721	1	0	0	0	0	0	0	0	0	0	0	0	0	0	0	0	0	0	0	0	0	0	0	0	0	0	0	0	0	0	0	0	0
A0A078G355	GWD3	Phosphoglucan, water dikinase(EC 2.7.9.5)	tr|A0A078G355|A0A078G355_BRANA BnaA09g04240D protein OS=Brassica napus GN=BnaA09g04240D PE=4 SV=1;tr|A0A078DCR5|A0A078DCR5_BRANA BnaC09g03660D protein OS=Brassica napus GN=BnaC09g03660D PE=4 SV=1	128.77	1179	6	16539000	10530000	9982200	12350400	14339000	15921000	16183000	15481000	11214000	3870400	13023000	9.36913e+06	17852000	33591000	21288000	2.42437e+07	25563000	15532000	23587000	2.15607e+07	21224000	13723000	16748000	1.72317e+07	0	6502000	18837000	8.44633e+06	17123000	5820300	11798000	1.15804e+07
A0A078DG90	ERF1-1	Eukaryotic peptide chain release factor subunit 1-1 Eukaryotic release factor 1-1 eRF1-1	tr|A0A078DG90|A0A078DG90_BRANA BnaA06g30550D protein OS=Brassica napus GN=BnaA06g30550D PE=4 SV=1;tr|A0A078DDD6|A0A078DDD6_BRANA BnaC07g26240D protein OS=Brassica napus GN=BnaC07g26240D PE=4 SV=1	48.696	434	1	0	0	0	0	0	0	0	0	0	0	0	0	0	0	0	0	0	0	0	0	0	0	0	0	0	0	0	0	0	0	0	0
A0A078G306	TIC20-II	Protein TIC 20-II(AtTIC20-II)	tr|A0A078G306|A0A078G306_BRANA BnaA09g04620D protein OS=Brassica napus GN=BnaA09g04620D PE=4 SV=1;tr|A0A078DDG9|A0A078DDG9_BRANA BnaC09g04070D protein OS=Brassica napus GN=BnaC09g04070D PE=4 SV=1	21.524	196	1	0	739050	0	246350	0	0	831020	277007	0	0	0	0	0	0	0	0	0	0	0	0	4829600	0	0	1.60987e+06	132550000	2379300	9620200	4.81832e+07	6675800	21597000	3947800	10740200
A0A078JMF8	WIN1	Acetylornithine aminotransferase (ACOAT) (EC 2.6.1.11)	tr|A0A078JMF8|A0A078JMF8_BRANA BnaC02g46570D protein OS=Brassica napus GN=BnaC02g46570D PE=3 SV=1;tr|A0A078HH16|A0A078HH16_BRANA BnaA02g19550D protein OS=Brassica napus GN=BnaA02g19550D PE=3 SV=1;tr|A0A078HT85|A0A078HT85_BRANA BnaC06g40410D protein OS=Bras	47.749	448	4	2910700	6056100	6436600	5.13447e+06	0	5140800	13892000	6.34427e+06	22168000	8618500	18377000	1.63878e+07	4915600	3274900	0	2.73017e+06	10284000	0	37546000	1.59433e+07	4021300	12326000	5255000	7.20077e+06	0	0	0	0	0	0	4368400	1.45613e+06
A0A078DDQ2	RPS1	30S ribosomal protein S1	tr|A0A078DDQ2|A0A078DDQ2_BRANA BnaC07g27340D protein OS=Brassica napus GN=BnaC07g27340D PE=4 SV=1;tr|A0A078DFX6|A0A078DFX6_BRANA BnaA06g29350D protein OS=Brassica napus GN=BnaA06g29350D PE=4 SV=1	43.779	402	1	57040000	0	299780000	118940000	0	90631000	140890000	7.71737e+07	0	0	0	0	0	27705000	10954000	1.28863e+07	0	112950000	87193000	6.67143e+07	0	84684000	114760000	6.64813e+07	0	0	0	0	102370000	130820000	143830000	1.25673e+08
A0A078DDS4	PGK3	Phosphoglycerate kinase 3	tr|A0A078DDS4|A0A078DDS4_BRANA Phosphoglycerate kinase OS=Brassica napus GN=BnaA07g34980D PE=3 SV=1;tr|A0A078DHY9|A0A078DHY9_BRANA Phosphoglycerate kinase OS=Brassica napus GN=BnaC06g39910D PE=3 SV=1	42.131	401	2	0	0	3651300	1217100	10468000	35881000	33105000	2.64847e+07	41968000	30275000	0	24081000	38580000	0	15406000	1.79953e+07	0	0	0	0	0	15910000	0	5.30333e+06	197200000	137810000	2461800	112490600	7908000	29750000	42688000	26782000
A0A078DDS9	ALDH5F1	Succinate-semialdehyde dehydrogenase	tr|A0A078DDS9|A0A078DDS9_BRANA BnaA07g34930D protein OS=Brassica napus GN=BnaA07g34930D PE=3 SV=1;tr|A0A078DHY6|A0A078DHY6_BRANA BnaC06g39860D protein OS=Brassica napus GN=BnaC06g39860D PE=3 SV=1	59.441	552	4	63151000	15369000	41714000	40078000	4871600	0	14823000	6.56487e+06	79819000	258020000	14160000	117333000	45209000	39873000	226660000	103914000	88132000	0	564300000	2.17477e+08	123360000	191422000	141850000	1.52211e+08	0	0	26471000	8.82367e+06	61993000	9947800	110960000	6.09669e+07
A0A078DGS9	At1g78830	EP1-like glycoprotein 2	tr|A0A078DGS9|A0A078DGS9_BRANA BnaC06g39250D protein OS=Brassica napus GN=BnaC06g39250D PE=4 SV=1;tr|A0A078DDT2|A0A078DDT2_BRANA BnaA07g34420D protein OS=Brassica napus GN=BnaA07g34420D PE=4 SV=1	50.267	454	2	0	0	87006000	29002000	0	0	20283000	6761000	0	705160000	0	2.35053e+08	0	0	0	0	117840000	83257000	83581000	9.48927e+07	0	0	0	0	0	0	63705000	21235000	192090000	53510000	78654000	1.08085e+08
A0A078DDT7	AMC4	Metacaspase-4	tr|A0A078DDT7|A0A078DDT7_BRANA BnaA07g34830D protein OS=Brassica napus GN=BnaA07g34830D PE=4 SV=1;tr|A0A078DH62|A0A078DH62_BRANA BnaC06g39740D protein OS=Brassica napus GN=BnaC06g39740D PE=4 SV=1	42.118	383	3	5031900	8485000	7247800	6.92157e+06	10036000	28685000	4222700	1.43146e+07	0	0	603350	201117	2389500	7106400	21862000	1.04526e+07	8863300	13270000	14118000	1.20838e+07	0	0	0	0	43149000	3539900	13104000	1.9931e+07	5893000	6535500	7726700	6718400
A0A078JZE3	At1g79010	NADH dehydrogenase [ubiquinone] iron-sulfur protein 8-A(EC 1.6.5.3)	tr|A0A078JZE3|A0A078JZE3_BRANA BnaCnng70500D protein (Fragment) OS=Brassica napus GN=BnaCnng70500D PE=3 SV=1;tr|A0A078J324|A0A078J324_BRANA BnaA07g38480D protein OS=Brassica napus GN=BnaA07g38480D PE=3 SV=1;tr|A0A078DMQ7|A0A078DMQ7_BRANA BnaC06g39420D prot	20.241	174	2	0	0	0	0	0	0	0	0	0	257090000	184720000	147270000	0	0	0	0	0	0	0	0	0	0	0	0	0	0	0	0	97394000	8213900	85418000	63675300
A0A078DDY1	RPL13	50S ribosomal protein L13	tr|A0A078DDY1|A0A078DDY1_BRANA BnaA07g34280D protein OS=Brassica napus GN=BnaA07g34280D PE=3 SV=1;tr|A0A078GNX5|A0A078GNX5_BRANA BnaA02g18970D protein OS=Brassica napus GN=BnaA02g18970D PE=3 SV=1;tr|A0A078FJL5|A0A078FJL5_BRANA BnaC02g25080D protein OS=Bras	26.795	240	4	7109300	13035000	10230000	1.01248e+07	619090	24251000	35619000	20163030	39278000	48330000	46388000	4.46653e+07	11710000	6070500	4393900	7.39147e+06	23111000	9763500	18288000	1.70542e+07	24994000	6295100	4253900	1.18477e+07	326390000	3472500	5543300	1.11802e+08	5714800	7165400	5957200	6.27913e+06
A0A078FTB8	KAB1	Probable voltage-gated potassium channel subunit beta (K(+) channel subunit beta)	tr|A0A078FTB8|A0A078FTB8_BRANA BnaA08g28020D protein OS=Brassica napus GN=BnaA08g28020D PE=4 SV=1;tr|A0A078DE36|A0A078DE36_BRANA BnaC08g00890D protein OS=Brassica napus GN=BnaC08g00890D PE=4 SV=1;tr|A0A078FUX2|A0A078FUX2_BRANA BnaC05g02730D protein OS=Bras	36.562	328	2	21301000	0	130700000	50667000	0	38382000	42106000	2.68293e+07	5149000	0	5316500	3488500	3275800	10035000	0	4.43693e+06	4224100	0	44536000	1.62534e+07	24142000	26775000	19335000	2.34173e+07	0	27946000	21046000	1.63307e+07	37777000	44996000	22363000	3.50453e+07
A0A078DP86	At5g14910	Heavy metal transport/detoxification superfamily protein	tr|A0A078DP86|A0A078DP86_BRANA BnaC02g05810D protein OS=Brassica napus GN=BnaC02g05810D PE=4 SV=1;tr|A0A078DE63|A0A078DE63_BRANA BnaA02g02350D protein OS=Brassica napus GN=BnaA02g02350D PE=4 SV=1	18.187	173	1	835600	0	999200	611627	6149700	0	341020000	1.15723e+08	2092300	2369400	2045100	2.16893e+06	833080	15158000	2134300	6.04179e+06	1994200	0	0	664733	414570000	50851000	248840000	238087000	0	17912000	0	5.97067e+06	13979000	9353300	76475000	33269100
A0A078DII3	PPD4	PsbP domain-containing protein 4	tr|A0A078DII3|A0A078DII3_BRANA BnaC06g37830D protein OS=Brassica napus GN=BnaC06g37830D PE=4 SV=1;tr|A0A078DEA9|A0A078DEA9_BRANA BnaA07g33280D protein OS=Brassica napus GN=BnaA07g33280D PE=4 SV=1	28.804	263	2	9750000	0	3517900	4.42263e+06	0	6407300	2132000	2.84643e+06	6085600	7028400	12725000	8613000	17566000	0	5281900	7.61597e+06	6203700	3206800	4292600	4567700	0	0	0	0	0	0	5344400	1.78147e+06	3024500	0	0	1.00817e+06
A0A078DEC6	FKBP19	Peptidyl-prolyl cis-trans isomerase FKBP19	tr|A0A078DEC6|A0A078DEC6_BRANA Peptidylprolyl isomerase OS=Brassica napus GN=BnaA02g01600D PE=4 SV=1;tr|A0A078DPA3|A0A078DPA3_BRANA Peptidylprolyl isomerase OS=Brassica napus GN=BnaC02g04720D PE=4 SV=1	27.215	249	1	0	0	1586100	528700	0	0	0	0	0	0	0	0	12223000	0	2113600	4.77887e+06	10818000	0	10620000	7146000	6856500	0	53868000	20241500	0	1017100	0	339033	5020600	2294000	1954700	3.08977e+06
A0A078DH40	PPD3	PsbP domain-containing protein 3	tr|A0A078DH40|A0A078DH40_BRANA BnaC06g37260D protein OS=Brassica napus GN=BnaC06g37260D PE=4 SV=1;tr|A0A078DEF2|A0A078DEF2_BRANA BnaA07g32780D protein OS=Brassica napus GN=BnaA07g32780D PE=4 SV=1	27.385	246	2	0	0	0	0	36284000	7233000	7195000	16904000	0	4638000	5578300	3.40543e+06	0	0	0	0	15044000	6798100	6008800	9.28363e+06	13801000	13805000	18760000	1.54553e+07	0	0	8685300	2895100	14724000	8372600	12965000	1.20205e+07
A0A078DEI2	At5g11420	Uncharacterized protein At5g11420	tr|A0A078DEI2|A0A078DEI2_BRANA BnaA02g01000D protein OS=Brassica napus GN=BnaA02g01000D PE=4 SV=1;tr|A0A078ECP0|A0A078ECP0_BRANA BnaC09g45170D protein OS=Brassica napus GN=BnaC09g45170D PE=4 SV=1;tr|A0A078BZD3|A0A078BZD3_BRANA BnaA10g21060D protein OS=Bras	39.859	366	1	0	0	0	0	12962000	19356000	0	1.07727e+07	31122000	51613000	0	2.75783e+07	0	0	0	0	0	0	0	0	0	0	0	0	0	0	0	0	0	0	0	0
A0A078DEM2	BOU	Mitochondrial carnitine/acylcarnitine carrier-like protein	tr|A0A078DEM2|A0A078DEM2_BRANA BnaC02g32740D protein OS=Brassica napus GN=BnaC02g32740D PE=3 SV=1;tr|A0A078HBR1|A0A078HBR1_BRANA BnaA09g18190D protein OS=Brassica napus GN=BnaA09g18190D PE=3 SV=1;tr|A0A078EMF8|A0A078EMF8_BRANA BnaC09g19660D protein OS=Bras	30.748	298	1	254800	279400	267200	267183	0	192130	120980	104370	0	0	0	0	323230	392340	322270	345947	329650	237560	164190	243800	0	0	0	0	0	848510	696120	514877	1375600	2009400	321380	1235460
A0A078DER5	LHCB5	Chlorophyll a-b binding protein CP26	tr|A0A078DER5|A0A078DER5_BRANA Chlorophyll a-b binding protein, chloroplastic OS=Brassica napus GN=BnaA09g22540D PE=3 SV=1	22.492	209	2	268580000	2409300000	2384100000	1.68733e+09	514890000	101500000	435310000	3.50567e+08	107650000	114200000	0	73950000	1878800000	1302300000	444520000	1208540000	1061100000	1136900000	37512000	7.45171e+08	323900000	587040000	489310000	466750000	0	638450000	0	2.12817e+08	2758000000	1449900000	1232200000	1.81337e+09
Q9XFW3	PMDH2	Peroxisomal NAD-malate dehydrogenase 2	sp|Q9XFW3|MDHG2_BRANA Malate dehydrogenase 2, glyoxysomal OS=Brassica napus GN=MDH2 PE=3 SV=1;sp|Q43743|MDHG1_BRANA Malate dehydrogenase 1, glyoxysomal OS=Brassica napus GN=MDH1 PE=2 SV=2;tr|A0A078DES1|A0A078DES1_BRANA Malate dehydrogenase OS=Brassica napu	37.724	358	2	539030000	428300000	1458600000	8.08643e+08	0	0	1097500	365833	277190000	630960000	422490000	4.43547e+08	280070000	408930000	0	2.29667e+08	909170000	282610000	446790000	546190000	1139100000	842030000	823260000	9.34797e+08	1870600	597310000	568060000	389080200	143160000	132360000	78091000	1.1787e+08
A0A078DET5	At1g74260	Probable phosphoribosylformylglycinamidine synthase	tr|A0A078DET5|A0A078DET5_BRANA BnaC06g23160D protein OS=Brassica napus GN=BnaC06g23160D PE=3 SV=1;tr|A0A078BVK6|A0A078BVK6_BRANA BnaA07g22320D protein OS=Brassica napus GN=BnaA07g22320D PE=3 SV=1	151.44	1382	1	0	118120000	0	3.93733e+07	28916000	48917000	0	2.59443e+07	11514000	14444000	11318000	1.24253e+07	0	44115000	0	14705000	0	0	37458000	12486000	0	0	0	0	0	0	0	0	0	0	0	0
C5IUM6	APXT	L-ascorbate peroxidase T(EC 1.11.1.11)	tr|C5IUM6|C5IUM6_BRANA Thylakoid-bound ascorbate peroxidase OS=Brassica napus PE=2 SV=1;tr|A0A078DEV5|A0A078DEV5_BRANA BnaA07g33560D protein OS=Brassica napus GN=BnaA07g33560D PE=3 SV=1;tr|A0A078HVC6|A0A078HVC6_BRANA BnaC02g13690D protein OS=Brassica napus	47.324	438	2	3600600	24504000	42516000	23540200	0	17392000	14367000	1.05863e+07	5423700	1640100	0	2354600	28660000	9903800	0	12854600	0	17229000	11718000	9649000	0	19513000	16208000	11907000	209480000	12406000	21706000	8.11973e+07	11213000	8266200	30645000	1.67081e+07
A0A078DEX1	AEE4	Probable acyl-activating enzyme 4	tr|A0A078DEX1|A0A078DEX1_BRANA BnaA07g33410D protein OS=Brassica napus GN=BnaA07g33410D PE=4 SV=1	60.089	544	1	0	0	0	0	2450600	0	10563000	4.33787e+06	0	0	0	0	0	0	0	0	0	0	0	0	0	0	2801500	933833	8606400	0	4296600	4301000	0	0	826100	275367
A0A078DEX3	RPL9B	60S ribosomal protein L9-1	tr|A0A078DEX3|A0A078DEX3_BRANA BnaA09g23960D protein OS=Brassica napus GN=BnaC06g08730D PE=4 SV=1;tr|A0A078H4Z1|A0A078H4Z1_BRANA BnaA09g16470D protein OS=Brassica napus GN=BnaA09g16470D PE=4 SV=1;tr|A0A078FPT5|A0A078FPT5_BRANA BnaA02g22240D protein OS=Bras	22.035	194	5	122170000	54087000	65608000	8.06217e+07	406050000	139320000	263930000	2.69767e+08	120170000	216510000	233050000	189910000	43544000	18331000	50230000	3.73683e+07	53623000	33958000	53669000	4.70833e+07	94581000	22639000	70002000	6.24073e+07	8916100	320520000	173150000	167528700	297330000	333180000	109650000	246720000
A0A078DM36	At1g77060	Carboxyvinyl-carboxyphosphonate phosphorylmutase	tr|A0A078DM36|A0A078DM36_BRANA BnaC06g37820D protein OS=Brassica napus GN=BnaC06g37820D PE=4 SV=1;tr|A0A078DEY4|A0A078DEY4_BRANA BnaA07g33260D protein OS=Brassica napus GN=BnaA07g33260D PE=4 SV=1;tr|A0A078JG83|A0A078JG83_BRANA BnaCnng47390D protein OS=Bras	36.459	340	1	46984000	31862000	42350000	4.03987e+07	45552000	0	0	15184000	0	0	0	0	18641000	0	17414000	1.20183e+07	0	4057200	0	1352400	0	0	0	0	0	0	0	0	33318000	0	0	11106000
A0A078JZE2	MWD9.11	Leucine-rich repeat (LRR) family protein	tr|A0A078JZE2|A0A078JZE2_BRANA BnaUnng04160D protein OS=Brassica napus GN=BnaUnng04160D PE=4 SV=1;tr|A0A078I3K5|A0A078I3K5_BRANA BnaC07g24740D protein OS=Brassica napus GN=BnaC07g24740D PE=4 SV=1;tr|A0A078HUU3|A0A078HUU3_BRANA BnaC02g08910D protein OS=Bras	25.986	229	1	0	0	0	0	0	0	0	0	0	0	0	0	0	0	0	0	0	0	0	0	0	0	0	0	3228800	818650	0	1349150	1451300	4174100	2193200	2606200
A0A078DFD6	AAO2	Indole-3-acetaldehyde oxidase IAA oxidase	tr|A0A078DFD6|A0A078DFD6_BRANA BnaC03g54410D protein OS=Brassica napus GN=BnaC03g54410D PE=4 SV=1;tr|A0A078FGH2|A0A078FGH2_BRANA BnaA06g20180D protein OS=Brassica napus GN=BnaA06g20180D PE=4 SV=1	142.35	1302	1	0	0	0	0	0	0	0	0	0	0	0	0	0	0	0	0	0	0	0	0	0	0	0	0	0	0	0	0	0	0	0	0
A0A078IXU2	IVD	Isovaleryl-CoA dehydrogenase(IVD) (EC 1.3.8.4)	tr|A0A078IXU2|A0A078IXU2_BRANA BnaA06g38800D protein OS=Brassica napus GN=BnaA06g38800D PE=3 SV=1;tr|A0A078DFF6|A0A078DFF6_BRANA BnaC03g55280D protein OS=Brassica napus GN=BnaC03g55280D PE=3 SV=1	44.654	409	2	434500	610300	733500	592797	0	322760	0	107587	1162000	670290	1280800	1.0377e+06	489430	460470	415420	455107	1247400	696200	544630	829410	0	258610	313970	190860	0	450910	738110	396340	6098000	949470	6106100	4.38452e+06
A0A078DFM5	TOC75-4	Protein TOC75-4	tr|A0A078DFM5|A0A078DFM5_BRANA BnaC03g56080D protein OS=Brassica napus GN=BnaC03g56080D PE=4 SV=1;tr|A0A078EE65|A0A078EE65_BRANA BnaA06g17900D protein OS=Brassica napus GN=BnaA06g17900D PE=4 SV=1;tr|A0A078BUG6|A0A078BUG6_BRANA BnaC01g24790D protein OS=Bras	69.053	624	7	32782000	27433000	16799000	2.56713e+07	37972000	283540000	59338000	126950000	2884000	0	0	961333	12597000	27877000	16838000	19104000	20796000	16893000	37101000	24930000	17601000	22344000	27309000	22418000	3126300	265720000	55052000	107966100	37001000	81744000	42686000	5.38103e+07
A0A078DFR8	SS1	Starch synthase 1	tr|A0A078DFR8|A0A078DFR8_BRANA Starch synthase, chloroplastic/amyloplastic OS=Brassica napus GN=BnaA06g26820D PE=3 SV=1	71.65	651	1	103100	132200	0	78440	0	48600	0	16200	0	0	0	0	0	0	0	0	181500	156300	0	112600	0	0	0	0	0	0	354810	118270	96500	107900	0	68133.3
A0A078IIX1	At1g52510	Alpha/beta-Hydrolases superfamily protein	tr|A0A078IIX1|A0A078IIX1_BRANA BnaA05g14820D protein OS=Brassica napus GN=BnaA05g14820D PE=4 SV=1;tr|A0A078DFY5|A0A078DFY5_BRANA BnaC06g09740D protein OS=Brassica napus GN=BnaC06g09740D PE=4 SV=1	41.605	376	4	57606000	0	145340000	6.76487e+07	48481000	72602000	8820700	4.33012e+07	0	9520100	0	3.17337e+06	0	0	0	0	108080000	19857000	32417000	5.34513e+07	47066000	45035000	42120000	4.47403e+07	350510000	16863000	47039000	1.38137e+08	18081000	29002000	35155000	2.74127e+07
A0A078DG58	At5g48480	Uncharacterized protein	tr|A0A078DG58|A0A078DG58_BRANA BnaA06g30200D protein OS=Brassica napus GN=BnaA06g30200D PE=4 SV=1	16.979	164	1	0	927800	0	309273	2894400	4970500	858370	2.90776e+06	1024800	1340900	0	788567	0	0	0	0	0	0	0	0	0	0	0	0	0	0	0	0	0	0	27904000	9.30133e+06
A0A078DGH9	PDIL1-2	Protein disulfide isomerase-like 1-2	tr|A0A078DGH9|A0A078DGH9_BRANA Protein disulfide-isomerase OS=Brassica napus GN=BnaC06g38200D PE=3 SV=1	55.924	511	1	0	0	128970000	42990000	0	0	0	0	0	0	0	0	79729000	53463000	0	4.43973e+07	0	0	0	0	0	0	0	0	0	0	49299000	16433000	0	0	47610000	15870000
A0A078DGK5	PDIL1-2	Protein disulfide isomerase-like 1-2	tr|A0A078DGK5|A0A078DGK5_BRANA Protein disulfide-isomerase OS=Brassica napus GN=BnaA07g33590D PE=3 SV=1;tr|A0A078HLV6|A0A078HLV6_BRANA Protein disulfide-isomerase OS=Brassica napus GN=BnaA02g18370D PE=3 SV=1	55.79	509	2	2770700	1425200	5726400	3.30743e+06	2802700	9372500	22491000	11555400	1356400	1293500	2542100	1.73067e+06	1635000	0	2267600	1.30087e+06	7543600	1087000	1886500	3505700	13026000	18114000	16110000	15750000	31109000	522330	11015000	1.42154e+07	9465600	25732000	6275000	13824200
A0A078DGN3	GRF1	General regulatory factor 1	tr|A0A078DGN3|A0A078DGN3_BRANA BnaC06g38800D protein OS=Brassica napus GN=BnaC06g38800D PE=3 SV=1;tr|A0A078DDZ0|A0A078DDZ0_BRANA BnaA07g34180D protein OS=Brassica napus GN=BnaA07g34180D PE=3 SV=1;tr|Q9AT81|Q9AT81_BRANA GF14 omega OS=Brassica napus PE=2 SV=	29.226	260	3	9346700	13980000	16444000	13256900	4361200	8396600	6622500	6460100	104480000	114220000	90197000	1.02966e+08	9286500	7615300	4454500	7.11877e+06	23066000	20752000	18974000	2.09307e+07	12631000	3290400	4212100	6.71117e+06	0	1234400	1072200	768867	3073800	3443400	3500900	3.33937e+06
A0A078FTH7	TIC110	Protein TIC110(Translocon at the inner envelope membrane of chloroplasts 110) (AtTIC110)	tr|A0A078FTH7|A0A078FTH7_BRANA BnaA08g28770D protein OS=Brassica napus GN=BnaA08g28770D PE=4 SV=1;tr|A0A078DGP6|A0A078DGP6_BRANA BnaC08g01950D protein OS=Brassica napus GN=BnaC08g01950D PE=4 SV=1	111.75	1013	2	6199600	5345700	24923000	12156100	0	0	0	0	0	0	5640500	1.88017e+06	0	0	0	0	0	0	9568600	3.18953e+06	0	0	0	0	0	9200500	71550000	2.69168e+07	8824900	0	0	2.94163e+06
A0A078HTC6	RHM1	Trifunctional UDP-glucose 4,6-dehydratase/UDP-4-keto-6-deoxy-D-glucose 3,5-epimerase/UDP-4-keto-L-rhamnose-reductase RHM1 (EC 4.2.1.76)	tr|A0A078HTC6|A0A078HTC6_BRANA BnaC05g13120D protein OS=Brassica napus GN=BnaC05g13120D PE=4 SV=1;tr|A0A078HBK9|A0A078HBK9_BRANA BnaA06g11470D protein OS=Brassica napus GN=BnaA06g11470D PE=4 SV=1;tr|A0A078DGU5|A0A078DGU5_BRANA BnaC06g38990D protein OS=Bras	75.229	670	1	2292800	0	0	764267	0	0	0	0	0	0	0	0	2078100	0	0	692700	2465200	0	0	821733	0	2314000	0	771333	0	0	6974900	2.32497e+06	3781800	0	4166300	2.64937e+06
A0A078DH94	PAE11	Pectin acetylesterase 11	tr|A0A078DH94|A0A078DH94_BRANA Pectin acetylesterase OS=Brassica napus GN=BnaC02g31500D PE=3 SV=1;tr|A0A078GNY9|A0A078GNY9_BRANA Pectin acetylesterase OS=Brassica napus GN=BnaA02g23870D PE=3 SV=1	42.204	391	5	14051000	0	9877400	7.97613e+06	6102700	16492000	20518000	14370900	21001000	42877000	48343000	37407000	9635800	34567000	13605000	1.92693e+07	3969900	15485000	27193000	15549300	55132000	45321000	24503000	41652000	2761300	3086700	7319900	4389300	49360000	35636000	45753000	43583000
A0A078DH99	AAE4	Probable acyl-activating enzyme 4	tr|A0A078DH99|A0A078DH99_BRANA BnaC06g37960D protein OS=Brassica napus GN=BnaC06g37960D PE=4 SV=1	59.937	543	1	0	0	0	0	2080700	4602100	2223100	2.96863e+06	0	0	0	0	0	0	0	0	0	0	0	0	0	0	0	0	0	0	0	0	0	0	0	0
A0A078FFW6	MHM17.18	At5g57040 (Gb|AAD55473.1) (Lactoylglutathione lyase / glyoxalase I family protein)	tr|A0A078FFW6|A0A078FFW6_BRANA BnaC03g13130D protein OS=Brassica napus GN=BnaC03g13130D PE=4 SV=1;tr|A0A078DHD3|A0A078DHD3_BRANA BnaA03g10440D protein OS=Brassica napus GN=BnaA03g10440D PE=4 SV=1	21.713	193	1	0	0	0	0	74371000	8281400	2853900	28502100	0	1760300	0	586767	0	0	0	0	0	732210	0	244070	0	4206800	0	1.40227e+06	0	0	37760000	1.25867e+07	0	0	0	0
A0A078J609	RPT3	26S proteasome regulatory subunit 6B homolog	tr|A0A078J609|A0A078J609_BRANA BnaC03g12460D protein OS=Brassica napus GN=BnaC03g12460D PE=3 SV=1;tr|A0A078HZ32|A0A078HZ32_BRANA BnaC09g33780D protein OS=Brassica napus GN=BnaC09g33780D PE=3 SV=1;tr|A0A078H5I1|A0A078H5I1_BRANA BnaA02g07760D protein OS=Bras	45.464	404	2	8942300	11574000	8377900	9631400	9990800	36165000	11568000	1.92413e+07	19744000	14022000	10440000	1.47353e+07	0	0	0	0	12288000	6150400	17017000	1.18185e+07	24349000	73513000	25096000	40986000	42767000	12249000	4562400	1.98595e+07	25440000	20481000	26704000	2.42083e+07
A0A078DHG9	LTP 3	Non-specific lipid-transfer protein 3	tr|A0A078DHG9|A0A078DHG9_BRANA Non-specific lipid-transfer protein OS=Brassica napus GN=BnaA03g09530D PE=3 SV=1	11.615	115	1	20075000	0	11351000	1.04753e+07	0	0	0	0	0	0	0	0	0	0	0	0	0	0	0	0	0	0	0	0	0	0	0	0	12843000	0	0	4281000
A0A078GKX8	RPL9D	60S ribosomal protein L9-2	tr|A0A078GKX8|A0A078GKX8_BRANA BnaA02g21980D protein OS=Brassica napus GN=BnaA02g21980D PE=4 SV=1;tr|A0A078E480|A0A078E480_BRANA BnaC02g29130D protein OS=Brassica napus GN=BnaC02g29130D PE=4 SV=1;tr|A0A078DHQ6|A0A078DHQ6_BRANA BnaA09g22530D protein OS=Bras	21.814	194	2	6863300	5069100	12213000	8.04847e+06	0	20148000	13483000	1.12103e+07	14514000	33015000	19662000	22397000	0	0	0	0	4894000	11581000	5119700	7.19823e+06	18908000	19507000	5103500	1.45062e+07	0	20391000	18607000	1.29993e+07	20582000	16864000	19130000	1.88587e+07
A0A078DSU8	RPL10AC	60S ribosomal protein	tr|A0A078DSU8|A0A078DSU8_BRANA BnaA10g13900D protein OS=Brassica napus GN=BnaA10g13900D PE=4 SV=1;tr|A0A078DHV5|A0A078DHV5_BRANA BnaA03g08540D protein OS=Brassica napus GN=BnaA03g08540D PE=4 SV=1;tr|A0A078JJT2|A0A078JJT2_BRANA BnaCnng47960D protein OS=Bras	16.93	150	2	0	0	1379500	459833	0	0	0	0	1413200	0	0	471067	1073400	0	984140	685847	1371500	0	0	457167	0	0	0	0	0	8342400	7815200	5.38587e+06	5870000	7922600	1105700	4966100
A0A078DI11	RPT6A	26S proteasome regulatory subunit 8 homolog A	tr|A0A078DI11|A0A078DI11_BRANA BnaA03g07840D protein OS=Brassica napus GN=BnaA03g07840D PE=3 SV=1;tr|A0A078I733|A0A078I733_BRANA BnaA02g04630D protein OS=Brassica napus GN=BnaA02g04630D PE=4 SV=1;tr|A0A078HYA5|A0A078HYA5_BRANA BnaC02g09300D protein OS=Bras	70.899	629	7	160700000	39933000	11773000	70802000	89461000	54464000	179290000	1.07738e+08	104020000	52308000	55913000	70747000	350670000	150770000	29068000	176836000	46573000	401710000	90604000	179629000	32273000	44605000	64102000	4.69933e+07	1201000000	17507000	6963200	4.0849e+08	20512000	28894000	53145000	3.41837e+07
A0A078J4P2	AILP1	Aluminum induced protein with YGL and LRDR motifs	tr|A0A078J4P2|A0A078J4P2_BRANA BnaCnng34110D protein OS=Brassica napus GN=BnaCnng34110D PE=4 SV=1;tr|A0A078I8G1|A0A078I8G1_BRANA BnaAnng08700D protein OS=Brassica napus GN=BnaAnng08700D PE=4 SV=1;tr|A0A078EN59|A0A078EN59_BRANA BnaC02g08540D protein OS=Bras	25.142	234	2	11286000	12812000	0	8.03267e+06	50441000	48517000	20094000	39684000	0	0	5956000	1.98533e+06	49354000	5232600	5283000	1.99565e+07	11800000	20834000	24263000	1.89657e+07	26453000	43428000	0	2.32937e+07	0	20449000	41070000	2.05063e+07	27771000	15787000	29593000	2.43837e+07
A0A078DIH4	A1	Elongation factor 1-alpha	tr|A0A078DIH4|A0A078DIH4_BRANA BnaA03g08920D protein OS=Brassica napus GN=BnaA03g08920D PE=4 SV=1;tr|A0A078G8C9|A0A078G8C9_BRANA BnaC08g43440D protein OS=Brassica napus GN=BnaC08g43440D PE=4 SV=1;tr|A0A078HAI0|A0A078HAI0_BRANA BnaA02g06370D protein OS=Bras	44.174	401	7	80563000	1691500000	1814100000	1.19539e+09	1379900000	779500000	802720000	9.87373e+08	2208200000	26824000	1251900000	1162308000	1573700000	1344900000	1619100000	1.51257e+09	526090000	514150000	441740000	4.93993e+08	474840000	257210000	1239800000	6.57283e+08	17068000	1479500000	1153900000	8.83489e+08	690720000	1284000000	1599100000	1.19127e+09
A0A078J3A4	RPS8A	40S ribosomal protein S8-1	tr|A0A078J3A4|A0A078J3A4_BRANA 40S ribosomal protein S8 (Fragment) OS=Brassica napus GN=BnaCnng36150D PE=3 SV=1;tr|A0A078DIR1|A0A078DIR1_BRANA 40S ribosomal protein S8 OS=Brassica napus GN=BnaA03g08070D PE=3 SV=1;tr|A0A078I2K9|A0A078I2K9_BRANA 40S ribosoma	25.453	228	1	0	0	0	0	0	0	0	0	0	0	0	0	196630	271720	295750	254700	0	216590	0	72196.7	95180	58380	0	51186.7	0	0	569940	189980	351100	363630	0	238243
A0A078I1G7	CYSC1	Cysteine synthase C1	tr|A0A078I1G7|A0A078I1G7_BRANA Cysteine synthase OS=Brassica napus GN=BnaC04g21780D PE=3 SV=1;tr|A0A078DIS3|A0A078DIS3_BRANA Cysteine synthase OS=Brassica napus GN=BnaA04g00700D PE=3 SV=1	39.945	368	2	68043000	169650000	177760000	1.38484e+08	0	0	118680000	39560000	0	107150000	0	3.57167e+07	74372000	34437000	0	3.62697e+07	0	166990000	0	5.56633e+07	86942000	47617000	0	44853000	0	177050000	50409000	7.58197e+07	133920000	73822000	55834000	8.78587e+07
A0A078I296	LHCA2	Photosystem I chlorophyll a/b-binding protein 2	tr|A0A078I296|A0A078I296_BRANA Chlorophyll a-b binding protein, chloroplastic OS=Brassica napus GN=BnaC04g21740D PE=3 SV=1;tr|A0A078DIV3|A0A078DIV3_BRANA Chlorophyll a-b binding protein, chloroplastic OS=Brassica napus GN=BnaA04g00660D PE=3 SV=1;tr|A0A078I	27.613	256	5	160620000	29092000	43642000	7.77847e+07	28320000	519060000	30135000	192505000	201350000	90589000	24932000	1.05624e+08	0	0	0	0	213950000	193690000	53280000	153640000	275040000	343400000	662360000	4.26933e+08	8211600000	107840000	300280000	2873240000	122650000	592410000	673230000	4.62763e+08
A0A078DIX4	VHA-A	V-type proton ATPase catalytic subunit A V-ATPase subunit A	tr|A0A078DIX4|A0A078DIX4_BRANA BnaA07g34490D protein OS=Brassica napus GN=BnaC06g39330D PE=3 SV=1	68.661	623	2	40616000	0	54670000	31762000	79247000	13741000	70500000	54496000	7279200	17838000	15705000	13607400	76340000	32498000	75172000	6.13367e+07	0	0	37548000	12516000	149660000	33328000	132460000	1.05149e+08	853270	120900000	109760000	77171090	122280000	203460000	67422000	131054000
A0A078DIZ0	RPS20B	40S ribosomal protein S20-2	tr|A0A078DIZ0|A0A078DIZ0_BRANA BnaA09g06070D protein OS=Brassica napus GN=BnaC09g05630D PE=3 SV=1;tr|A0A078H5A4|A0A078H5A4_BRANA BnaC03g15950D protein OS=Brassica napus GN=BnaC03g15950D PE=3 SV=1;tr|A0A078EH92|A0A078EH92_BRANA BnaA03g13080D protein OS=Bras	13.639	122	1	167910000	0	1067700000	411870000	89920000	72692000	85580000	8.27307e+07	808370000	527820000	3840600000	1.7256e+09	0	0	0	0	0	494740000	158840000	217860000	16847000	0	0	5.61567e+06	0	12000000	0	4000000	0	13303000	0	4.43433e+06
A0A078DJ04	CSP41A	Chloroplast stem-loop binding protein of 41 kDa a	tr|A0A078DJ04|A0A078DJ04_BRANA BnaA04g00110D protein OS=Brassica napus GN=BnaA04g00110D PE=4 SV=1;tr|A0A078DX79|A0A078DX79_BRANA BnaC04g20890D protein OS=Brassica napus GN=BnaC04g20890D PE=4 SV=1	43.294	399	9	770160000	2019400000	241240000	1.01027e+09	395000000	1009100000	1431700000	9.45267e+08	336240000	2637500000	1104100000	1359280000	670880000	483320000	733930000	6.29377e+08	1451700000	767920000	572630000	930750000	1213400000	1055200000	886050000	1051550000	617540000	697840000	730270000	6.81883e+08	476960000	292850000	452160000	4.07323e+08
A0A078DXA3	RRF	Ribosome-recycling factor, chloroplastic	tr|A0A078DXA3|A0A078DXA3_BRANA BnaC04g20850D protein OS=Brassica napus GN=BnaC04g20850D PE=3 SV=1;tr|A0A078DJ08|A0A078DJ08_BRANA BnaA04g00060D protein OS=Brassica napus GN=BnaA04g00060D PE=3 SV=1;tr|A0A078J2L7|A0A078J2L7_BRANA BnaA09g55740D protein OS=Bras	29.533	270	4	106630000	0	100790000	69140000	310490000	201150000	291640000	267760000	53197000	86861000	105410000	8.18227e+07	58236000	272300000	115820000	1.48785e+08	35616000	241850000	184390000	153952000	54364000	121810000	255550000	143908000	0	181200000	108320000	9.65067e+07	53821000	66941000	13960000	4.49073e+07
A0A078DJ73	ENL2	Early nodulin-like protein 2	tr|A0A078DJ73|A0A078DJ73_BRANA BnaA01g16530D protein OS=Brassica napus GN=BnaA01g16530D PE=4 SV=1;tr|A0A078G1A8|A0A078G1A8_BRANA BnaC01g20120D protein OS=Brassica napus GN=BnaC01g20120D PE=4 SV=1	32.835	328	2	0	0	4695100	1.56503e+06	0	0	0	0	6556700	3649800	23527000	11244500	7612000	5862300	0	4.49143e+06	1301000	0	9367200	3.55607e+06	10774000	6689900	6379100	7.94767e+06	0	5154200	0	1.71807e+06	146300000	37927000	150160000	1.11462e+08
A0A078H7X5	At5g58330	At5g58330 protein	tr|A0A078H7X5|A0A078H7X5_BRANA BnaA10g11990D protein OS=Brassica napus GN=BnaA10g11990D PE=4 SV=1;tr|A0A078J0D5|A0A078J0D5_BRANA BnaC03g12430D protein OS=Brassica napus GN=BnaC03g12430D PE=3 SV=1;tr|A0A078DJ94|A0A078DJ94_BRANA BnaA03g09800D protein OS=Bras	48.002	442	1	15773000	0	14646000	1.01397e+07	33351000	65910000	0	33087000	16883000	6518700	16786000	13395900	40337000	0	94200000	4.48457e+07	0	0	0	0	0	0	9721100	3.24037e+06	0	0	0	0	13914000	0	0	4638000
A0A078I6Z3	RPL14B	60S ribosomal protein L14-2	tr|A0A078I6Z3|A0A078I6Z3_BRANA BnaA03g48430D protein OS=Brassica napus GN=BnaA03g48430D PE=4 SV=1;tr|A0A078E837|A0A078E837_BRANA BnaC08g12410D protein OS=Brassica napus GN=BnaC08g12410D PE=4 SV=1;tr|A0A078DJB0|A0A078DJB0_BRANA BnaA01g16130D protein OS=Bras	18.392	159	2	26550000	0	48438000	24996000	0	0	0	0	17566000	101830000	43713000	5.43697e+07	0	13508000	0	4.50267e+06	0	0	0	0	28392000	32043000	0	20145000	1703700000	0	0	567900000	19190000	0	0	6.39667e+06
A0A078DY74	TIM22-3	Mitochondrial import inner membrane translocase subunit	tr|A0A078DY74|A0A078DY74_BRANA BnaC01g18840D protein OS=Brassica napus GN=BnaC01g18840D PE=4 SV=1;tr|A0A078DJD9|A0A078DJD9_BRANA BnaA01g15780D protein OS=Brassica napus GN=BnaA01g15780D PE=4 SV=1;tr|A0A078I734|A0A078I734_BRANA BnaC09g32030D protein OS=Bras	21.662	209	1	0	0	0	0	0	0	0	0	0	0	0	0	0	0	0	0	0	6165200	0	2.05507e+06	0	4359900	0	1453300	0	0	7715900	2.57197e+06	12180000	29283000	0	13821000
A0A078DJK8	At4g25900	Glucose-6-phosphate 1-epimerase	tr|A0A078DJK8|A0A078DJK8_BRANA BnaA01g15080D protein OS=Brassica napus GN=BnaA01g15080D PE=4 SV=1	36.606	323	1	133100	0	0	44366.7	0	0	348740	116247	5851500	0	8591800	4.81443e+06	4349700	1473700	2922400	2.91527e+06	536820	0	0	178940	266750	178730	131510	192330	0	0	0	0	3290000	3742800	3386800	3473200
A0A078DJZ3	SLP1	SPFH/Band 7/PHB domain-containing membrane-associated protein family	tr|A0A078DJZ3|A0A078DJZ3_BRANA BnaA01g16560D protein OS=Brassica napus GN=BnaA01g16560D PE=4 SV=1;tr|A0A078G337|A0A078G337_BRANA BnaC01g20150D protein OS=Brassica napus GN=BnaC01g20150D PE=4 SV=1;tr|A0A078IC23|A0A078IC23_BRANA BnaCnng14570D protein OS=Bras	43.279	395	2	465700	551100	575600	530833	496240	0	519110	338450	1158600	1047300	985490	1.0638e+06	795400	610270	0	468557	1146900	0	894130	680343	0	0	0	0	0	0	689820	229940	714920	1638200	637750	996957
A0A078E0V8	GDPDL3	Glycerophosphodiester phosphodiesterase	tr|A0A078E0V8|A0A078E0V8_BRANA BnaC01g18900D protein OS=Brassica napus GN=BnaC01g18900D PE=4 SV=1;tr|A0A078DK65|A0A078DK65_BRANA BnaA01g15810D protein OS=Brassica napus GN=BnaA01g15810D PE=4 SV=1	82.476	757	1	15284000	5718500	2496700	7.83307e+06	12733000	0	0	4.24433e+06	15755000	0	5078600	6.94453e+06	0	22516000	0	7.50533e+06	0	0	0	0	21736000	19852000	0	1.38627e+07	0	0	0	0	0	0	0	0
A0A078DKB8	TKL-1	Transketolase-1	tr|A0A078DKB8|A0A078DKB8_BRANA BnaA04g01120D protein OS=Brassica napus GN=BnaA04g01120D PE=4 SV=1	79.328	735	3	123570000	62029000	32720000	72773000	199570000	217970000	61962000	159834000	30012000	21373000	35895000	2.90933e+07	9369500	195010000	33995000	7.94582e+07	22636000	56446000	30797000	3.66263e+07	62994000	45450000	24950000	4.44647e+07	0	66586000	10320000	2.56353e+07	27499000	8643100	10109000	1.5417e+07
A0A078DKE7	SDR1	NAD(P)-binding Rossmann-fold superfamily protein	tr|A0A078DKE7|A0A078DKE7_BRANA BnaA04g00820D protein OS=Brassica napus GN=BnaA04g00820D PE=3 SV=1;tr|A0A078IY43|A0A078IY43_BRANA BnaAnng14460D protein OS=Brassica napus GN=BnaAnng14460D PE=3 SV=1	31.02	276	1	0	0	0	0	0	0	0	0	0	0	0	0	0	0	0	0	0	0	0	0	0	0	0	0	0	0	0	0	0	0	0	0
A0A078GMM8	RPS10A	40S ribosomal protein S10-1	tr|A0A078GMM8|A0A078GMM8_BRANA BnaC09g28670D protein OS=Brassica napus GN=BnaC09g28670D PE=4 SV=1;tr|A0A078IHL0|A0A078IHL0_BRANA BnaCnng17420D protein OS=Brassica napus GN=BnaCnng17420D PE=4 SV=1;tr|A0A078DKH7|A0A078DKH7_BRANA BnaA01g14960D protein OS=Bras	21.883	197	2	0	0	8612600	2.87087e+06	394080000	489020000	380730000	4.21277e+08	26608000	21830000	21187000	2.32083e+07	0	0	0	0	24549000	0	375730000	1.33426e+08	142450000	146094000	162163000	1.50236e+08	0	93374000	0	3.11247e+07	33667000	60303000	19916000	37962000
A0A078DKM4	HSP23.6	23.6 kDa heat shock protein	tr|A0A078DKM4|A0A078DKM4_BRANA BnaA01g14560D protein OS=Brassica napus GN=BnaA01g14560D PE=3 SV=1;tr|A0A078EUW6|A0A078EUW6_BRANA BnaC01g17140D protein OS=Brassica napus GN=BnaC01g17140D PE=3 SV=1	23.797	213	2	126420000	0	313210000	1.46543e+08	0	49235000	52950000	3.40617e+07	7005500	11431000	16851000	11762500	10778000	55996000	0	22258000	4584100	24042000	20148000	1.6258e+07	36673000	12982000	63065000	3.75733e+07	0	69709000	37745000	35818000	6844900	0	0	2.28163e+06
A0A078FUV8	MDH1	Malate dehydrogenase 1 (EC 1.1.1.37)	tr|A0A078FUV8|A0A078FUV8_BRANA Malate dehydrogenase OS=Brassica napus GN=BnaC05g02530D PE=3 SV=1;tr|A0A078DKQ9|A0A078DKQ9_BRANA Malate dehydrogenase OS=Brassica napus GN=BnaA10g02560D PE=3 SV=1	35.728	332	3	102230000	57072000	131870000	9.70573e+07	93642000	13592000	4831300	37355100	267370000	32435000	114560000	1.38122e+08	93644000	49337000	32894000	58625000	65145000	6785000	57863000	4.32643e+07	49030000	47116000	61742000	5.26293e+07	158180000	92847000	42602000	9.78763e+07	49444000	50232000	51870000	5.05153e+07
A0A078GUT8	PORB	Protochlorophyllide reductase B (EC 1.3.1.33)	tr|A0A078GUT8|A0A078GUT8_BRANA BnaC01g19630D protein OS=Brassica napus GN=BnaC01g19630D PE=4 SV=1;tr|A0A078DKU7|A0A078DKU7_BRANA BnaA01g16440D protein OS=Brassica napus GN=BnaA01g16440D PE=4 SV=1;tr|A0A078FIQ3|A0A078FIQ3_BRANA BnaA10g07300D protein OS=Bras	42.951	397	6	4839000	5299000	3830000	4655998	1811400	1610000	1575000	1.66547e+06	1718300	2188300	2099500	2.00203e+06	727700	1014500	701900	814700	3199200	2677400	2601900	2.82617e+06	817700	910000	657300	795000	76130000	82773000	71992000	76965000	712900	1032800	509500	751733
A0A078DKW5	At1g04420	NAD(P)-linked oxidoreductase superfamily protein	tr|A0A078DKW5|A0A078DKW5_BRANA BnaA10g02570D protein OS=Brassica napus GN=BnaA10g02570D PE=4 SV=1;tr|A0A078FYX1|A0A078FYX1_BRANA BnaC05g02540D protein OS=Brassica napus GN=BnaC05g02540D PE=4 SV=1	51.057	458	8	181430000	195670000	383660000	2.53587e+08	201680000	88456000	312970000	2.01035e+08	120200000	170450000	315450000	2.02033e+08	277740000	151380000	152320000	1.93813e+08	282150000	214120000	158290000	2.18187e+08	155480000	80179000	121500000	119053000	1380300000	336130000	298390000	6.71607e+08	184270000	167530000	208240000	186680000
A0A078DL01	PSB27-1	Photosystem II repair protein PSB27-H1	tr|A0A078DL01|A0A078DL01_BRANA BnaA10g02020D protein OS=Brassica napus GN=BnaA10g02020D PE=4 SV=1;tr|A0A078JWQ6|A0A078JWQ6_BRANA BnaAnng39860D protein OS=Brassica napus GN=BnaAnng39860D PE=3 SV=1;tr|A0A078JST6|A0A078JST6_BRANA BnaAnng34570D protein OS=Bras	9.3215	84	2	551320000	0	48985000	2.00102e+08	637620000	192070000	354430000	3.94707e+08	105050000	102210000	127000000	111420000	39354000	315470000	310820000	2.21881e+08	28454000	204280000	458260000	2.30331e+08	338360000	187630000	360500000	2.95497e+08	0	147790000	214350000	1.20713e+08	157620000	13300000	68672000	79864000
A0A078DL02	SUMO1	Small ubiquitin-related modifier 1	tr|A0A078DL02|A0A078DL02_BRANA Small ubiquitin-related modifier OS=Brassica napus GN=BnaA01g15940D PE=3 SV=1;tr|A0A078GXA8|A0A078GXA8_BRANA Small ubiquitin-related modifier OS=Brassica napus GN=BnaC01g19050D PE=3 SV=1;tr|V9LY86|V9LY86_BRANA Small ubiquitin	11.12	100	2	0	2123900	0	707967	36774000	1611200	41206000	26530400	0	0	0	0	0	0	0	0	9661100	1864200	0	3.84177e+06	0	936020	21228000	7.38801e+06	0	22061000	0	7.35367e+06	102380000	30725000	0	4.43683e+07
A0A078J0P5	F26G5_50	MD-2-related lipid recognition domain-containing protein	tr|A0A078J0P5|A0A078J0P5_BRANA BnaA06g38880D protein OS=Brassica napus GN=BnaA06g38880D PE=4 SV=1;tr|A0A078DL20|A0A078DL20_BRANA BnaC03g54530D protein OS=Brassica napus GN=BnaC03g54530D PE=4 SV=1	16.249	152	1	597630	423290	543480	521467	971310	463790	848920	761340	6896800	7284700	3686900	5.95613e+06	680790	673250	0	451347	1747800	1000400	951720	1.23331e+06	129340	226840	0	118727	0	0	408180	136060	1239700	1330800	1212800	1261100
A0A078DL34	FBA5	Fructose-bisphosphate aldolase 5	tr|A0A078DL34|A0A078DL34_BRANA Fructose-bisphosphate aldolase OS=Brassica napus GN=BnaA01g15640D PE=3 SV=1	38.229	358	1	0	78296000	742300000	273532000	124550000	621720000	0	2.48757e+08	192850000	567420000	0	2.53423e+08	132360000	405770000	527870000	3.55333e+08	0	0	0	0	246670000	186710000	279940000	2.37773e+08	0	97642000	16896000	3.81793e+07	241040000	496590000	193480000	310370000
A0A078FSF5	PPOX	Protoporphyrinogen/coproporphyrinogen III oxidase	tr|A0A078DL58|A0A078DL58_BRANA Protoporphyrinogen/coproporphyrinogen III oxidase OS=Brassica napus GN=BnaA10g01010D PE=3 SV=1;tr|A0A078FSF5|A0A078FSF5_BRANA Protoporphyrinogen/coproporphyrinogen III oxidase OS=Brassica napus GN=BnaC05g01120D PE=3 SV=1	57.296	536	3	40118900	30182700	42002000	3.74346e+07	11134000	14706000	24857000	16899000	18837500	20194800	15261700	18098000	4535600	5699000	3122700	4.45243e+06	18447300	21778400	22094800	20773500	3177500	5584900	5184900	4649100	90756000	74884000	80336000	81992000	8928600	6200400	9788200	8.30573e+06
A0A078F464	LYM2	LysM domain-containing GPI-anchored protein 2	tr|A0A078F464|A0A078F464_BRANA BnaC03g47500D protein OS=Brassica napus GN=BnaC03g47500D PE=4 SV=1;tr|A0A078DL91|A0A078DL91_BRANA BnaA06g25940D protein OS=Brassica napus GN=BnaA06g25940D PE=4 SV=1	38.174	362	1	0	0	0	0	0	0	0	0	0	0	0	0	0	0	853170	284390	0	0	0	0	2047100	0	0	682367	0	0	0	0	706420	0	778460	494960
A0A078FMX3	TSS	Protein TSS (TPR-domain suppressor of STIMPY)	tr|A0A078FMX3|A0A078FMX3_BRANA BnaA08g13880D protein OS=Brassica napus GN=BnaA08g13880D PE=4 SV=1;tr|A0A078E879|A0A078E879_BRANA BnaC08g12860D protein OS=Brassica napus GN=BnaC08g12860D PE=4 SV=1;tr|A0A078DLH2|A0A078DLH2_BRANA BnaA10g00570D protein OS=Bras	190.12	1740	1	0	0	16823000	5.60767e+06	0	0	0	0	0	0	0	0	9509000	0	0	3.16967e+06	0	0	9040200	3013400	0	0	0	0	0	48610000	0	1.62033e+07	0	0	0	0
A0A078J7N7	At1g30230	Elongation factor 1-delta 1 (EF-1-delta 1)	tr|A0A078J7N7|A0A078J7N7_BRANA BnaCnng34540D protein OS=Brassica napus GN=BnaCnng34540D PE=3 SV=1;tr|A0A078DLT5|A0A078DLT5_BRANA BnaA08g17480D protein OS=Brassica napus GN=BnaA08g17480D PE=3 SV=1;tr|A0A078IKN9|A0A078IKN9_BRANA BnaCnng17800D protein OS=Bras	25.59	234	4	383230000	55435000	424440000	2.87702e+08	928060000	342290000	428550000	566300000	117120000	75606000	69700000	8.74753e+07	16126000	174980000	314830000	1.68645e+08	52308000	483310000	516680000	350766000	528340000	704580000	812270000	681730000	47885000	246900000	0	9.82617e+07	187170000	112520000	262080000	1.87257e+08
A0A078FTK9	RPN6	26S proteasome non-ATPase regulatory subunit 11 homolog	tr|A0A078FTK9|A0A078FTK9_BRANA BnaA07g08190D protein OS=Brassica napus GN=BnaA07g08190D PE=4 SV=1;tr|A0A078E209|A0A078E209_BRANA BnaC07g10090D protein OS=Brassica napus GN=BnaC07g10090D PE=4 SV=1;tr|A0A078HXQ5|A0A078HXQ5_BRANA BnaC03g58920D protein OS=Bras	33.263	291	1	0	0	0	0	0	0	0	0	0	0	0	0	0	2204200	0	734733	0	0	0	0	4400100	2396300	0	2.26547e+06	0	0	3655300	1.21843e+06	0	541470	4100300	1.54726e+06
A0A078IPM7	PORC	Protochlorophyllide reductase C(PCR C) (EC 1.3.1.33)	tr|A0A078IPM7|A0A078IPM7_BRANA BnaC08g46210D protein OS=Brassica napus GN=BnaC08g46210D PE=4 SV=1;tr|A0A078FM18|A0A078FM18_BRANA BnaA08g27540D protein OS=Brassica napus GN=BnaA08g27540D PE=4 SV=1;tr|A0A078FUP6|A0A078FUP6_BRANA BnaC05g01980D protein OS=Bras	43.545	398	1	0	0	0	0	29188000	43155000	34597000	3.56467e+07	0	0	0	0	0	0	0	0	0	0	0	0	0	0	33211000	1.10703e+07	0	52452000	109760000	5.40707e+07	0	18410000	25355000	1.45883e+07
A0A078DM31	CLPP5	ATP-dependent Clp protease proteolytic subunit 5	tr|A0A078DM31|A0A078DM31_BRANA ATP-dependent Clp protease proteolytic subunit OS=Brassica napus GN=BnaA10g01200D PE=3 SV=1;tr|A0A078FLD4|A0A078FLD4_BRANA ATP-dependent Clp protease proteolytic subunit OS=Brassica napus GN=BnaC05g01290D PE=3 SV=1	31.791	294	3	354530000	4877400	248430000	2.02612e+08	102090000	87251000	21291000	7.02107e+07	92906000	51694000	210060000	118220000	62024000	116090000	28899000	6.90043e+07	22103000	3616900	158130000	61283300	65870000	35145000	66412000	55809000	0	6195600	164450000	5.68819e+07	185950000	129060000	172870000	1.62627e+08
A0A078DM39	AGT1	Serine--glyoxylate aminotransferase	tr|A0A078DM39|A0A078DM39_BRANA BnaC03g45180D protein OS=Brassica napus GN=BnaC03g45180D PE=3 SV=1	44.181	401	1	0	11511000	0	3837000	0	0	0	0	1574100	2062400	6712000	3449500	0	0	401690000	1.33897e+08	222080000	0	0	7.40267e+07	0	0	0	0	819420000	0	0	273140000	73709000	214930000	202860000	163833000
A0A078E0S4	At2g15130	Plant basic secretory protein (BSP) family protein	tr|A0A078E0S4|A0A078E0S4_BRANA BnaA03g38800D protein OS=Brassica napus GN=BnaA03g38800D PE=4 SV=1;tr|A0A078DM80|A0A078DM80_BRANA BnaC03g45680D protein OS=Brassica napus GN=BnaC03g45680D PE=4 SV=1	25.076	225	2	3383900	2527800	0	1.97057e+06	0	2391500	1822500	1.40467e+06	0	38284000	3617700	1.39672e+07	2654800	3044200	7555300	4418100	3169400	2364000	1428700	2320700	0	5469000	1133500	2.20083e+06	0	0	1884500	628167	5947000	0	5524200	3.82373e+06
A0A078IKT4	ndhM	NAD(P)H-quinone oxidoreductase subunit M	tr|A0A078IKT4|A0A078IKT4_BRANA BnaC03g61160D protein OS=Brassica napus GN=BnaC03g61160D PE=4 SV=1;tr|A0A078DM93|A0A078DM93_BRANA BnaA08g15880D protein OS=Brassica napus GN=BnaA08g15880D PE=4 SV=1	25.143	220	3	20850000	25692000	33148000	2.65633e+07	54481000	69325000	107320000	77042000	174640000	192000000	59347000	1.41996e+08	63022000	62599000	69880000	65167000	233980000	117490000	26238000	1.25903e+08	114250000	164635200	115254000	1.3138e+08	1518000	19633000	37964000	19705000	7847700	18279000	0	8708900
A0A078FS95	SDR1	NAD(P)-binding Rossmann-fold superfamily protein	tr|A0A078FS95|A0A078FS95_BRANA BnaC05g00270D protein OS=Brassica napus GN=BnaC05g00270D PE=3 SV=1;tr|A0A078DMB8|A0A078DMB8_BRANA BnaA10g00200D protein OS=Brassica napus GN=BnaA10g00200D PE=3 SV=1	31.863	295	1	42835000	0	0	1.42783e+07	0	0	86595000	28865000	5488100	0	7966700	4.48493e+06	0	0	0	0	5263500	49002000	0	18088500	0	0	0	0	0	28634000	4835000	1.11563e+07	0	96757000	0	3.22523e+07
A0A078DMI1	At4g39970	Haloacid dehalogenase-like hydrolase domain-containing protein	tr|A0A078DMI1|A0A078DMI1_BRANA BnaA08g16090D protein OS=Brassica napus GN=BnaA08g16090D PE=4 SV=1	34.015	307	1	0	203720	0	67906.7	168640	0	0	56213.3	400070	0	0	133357	0	0	342780	114260	481620	0	0	160540	0	198500	163200	120567	0	0	1549900	516633	1188600	0	667400	618667
A0A078DMJ2	At1g29670	GDSL esterase/lipase	tr|A0A078DMJ2|A0A078DMJ2_BRANA BnaA08g17820D protein OS=Brassica napus GN=BnaA08g17820D PE=4 SV=1	40.008	360	1	0	23866000	0	7.95533e+06	14557000	4407000	22262000	13742000	0	329660000	35470000	121710000	13950000	0	10639000	8.19633e+06	0	0	50107000	1.67023e+07	13263000	0	0	4421000	0	3492200	5159000	2.88373e+06	38486000	0	10121000	1.62023e+07
A0A078DMP0	CYP18-3	Peptidyl-prolyl cis-trans isomerase CYP18-3 (PPIase CYP18-3) (EC 5.2.1.8)	tr|A0A078DMP0|A0A078DMP0_BRANA Peptidyl-prolyl cis-trans isomerase OS=Brassica napus GN=BnaA08g16920D PE=3 SV=1	18.311	172	2	28308000	0	12020000	1.34427e+07	10623000	1576300	0	4.06643e+06	14361000	0	11883000	8748000	0	0	0	0	0	0	0	0	1997400	0	0	665800	0	11308000	4352600	5220200	48315000	13903000	56996000	39738000
A0A078FGM1	FBA1	Fructose-bisphosphate aldolase 1	tr|A0A078FGM1|A0A078FGM1_BRANA Fructose-bisphosphate aldolase OS=Brassica napus GN=BnaC03g60280D PE=3 SV=1;tr|A0A078DMP5|A0A078DMP5_BRANA Fructose-bisphosphate aldolase OS=Brassica napus GN=BnaA08g16820D PE=3 SV=1	41.333	383	2	2407200	541490	1044300	1.331e+06	540960	275990	346760	387903	875720	488000	381990	581903	687100	551990	535590	591560	0	551810	457490	336433	344070	1328000	1549800	1.07396e+06	4645000	264370000	2238900	9.0418e+07	1576300	1582300	427490	1.19536e+06
A0A078JEX0	AGT2	Alanine:glyoxylate aminotransferase 2	tr|A0A078JEX0|A0A078JEX0_BRANA BnaC03g76360D protein OS=Brassica napus GN=BnaC03g76360D PE=3 SV=1;tr|A0A078I0N9|A0A078I0N9_BRANA BnaC01g00550D protein OS=Brassica napus GN=BnaC01g00550D PE=3 SV=1;tr|A0A078HTY5|A0A078HTY5_BRANA BnaA01g05670D protein OS=Bras	51.988	476	3	17305000	80421000	54978000	5.09013e+07	0	27772000	49671000	2.58143e+07	19512000	340880000	16944000	1.25779e+08	32570000	34684000	156850000	7.47013e+07	9144900	98610000	216800000	1.08185e+08	0	24110000	65736000	2.99487e+07	374320000	22858000	0	1.32393e+08	220540000	86789000	74515000	1.27281e+08
A0A078GC93	FLA13	Fasciclin-like arabinogalactan protein 13	tr|A0A078GC93|A0A078GC93_BRANA BnaA06g36300D protein OS=Brassica napus GN=BnaA06g36300D PE=4 SV=1;tr|A0A078DZZ1|A0A078DZZ1_BRANA BnaC07g17650D protein OS=Brassica napus GN=BnaC07g17650D PE=4 SV=1;tr|A0A078FZJ3|A0A078FZJ3_BRANA BnaC05g02150D protein OS=Bras	25.811	244	1	14116000	2718200	4617300	7150500	3186800	13041000	8410200	8.21267e+06	0	136320000	1667400	45995800	0	0	25232000	8.41067e+06	0	17020000	0	5.67333e+06	18006000	0	15099000	11035000	0	0	0	0	15720000	70643000	107580000	6.46477e+07
A0A078DMV7	CAD7	Cinnamyl alcohol dehydrogenase 7	tr|A0A078DMV7|A0A078DMV7_BRANA BnaA08g15920D protein OS=Brassica napus GN=BnaA08g15920D PE=3 SV=1;tr|Q9AXW6|Q9AXW6_BRANA Eli3 product (Fragment) OS=Brassica napus GN=ELI3-BN-4 PE=4 SV=1;tr|Q9AXW7|Q9AXW7_BRANA Eli3 product (Fragment) OS=Brassica napus GN=EL	38.785	357	3	0	0	0	0	0	14293000	0	4.76433e+06	0	0	194310000	64770000	75649000	27836000	38169000	47218000	0	0	0	0	0	52264000	49792000	3.40187e+07	0	10875000	56803000	2.25593e+07	21014000	20560000	37033000	2.62023e+07
A0A078DMW2	HSP70-9	Heat shock 70 kDa protein 9	tr|A0A078DMW2|A0A078DMW2_BRANA BnaA08g15870D protein OS=Brassica napus GN=BnaA08g15870D PE=3 SV=1;tr|A0A078IIB3|A0A078IIB3_BRANA BnaC03g61170D protein OS=Brassica napus GN=BnaC03g61170D PE=3 SV=1;tr|A0A078BYD0|A0A078BYD0_BRANA BnaC01g01110D protein OS=Bras	72.66	678	1	5285300	3837500	4127300	4416700	0	8616200	0	2.87207e+06	0	3352800	7105700	3.48617e+06	0	0	0	0	0	4263000	0	1421000	0	6096600	0	2032200	0	0	0	0	4415900	0	0	1.47197e+06
A0A078FCI9	CYP74B2	Probable inactive linolenate hydroperoxide lyase	tr|A0A078FCI9|A0A078FCI9_BRANA BnaC07g32980D protein OS=Brassica napus GN=BnaC07g32980D PE=3 SV=1;tr|A0A078DMX7|A0A078DMX7_BRANA BnaA03g41900D protein OS=Brassica napus GN=BnaA03g41900D PE=3 SV=1	43.002	384	2	0	0	0	0	10465000	11474000	7166200	9.70173e+06	0	0	0	0	0	0	0	0	0	0	0	0	0	0	0	0	0	0	0	0	13231000	49850000	0	21027000
A0A078H0N7	HSP70-17	Heat shock 70 kDa protein 17	tr|A0A078H0N7|A0A078H0N7_BRANA BnaA01g17140D protein OS=Brassica napus GN=BnaA01g17140D PE=3 SV=1;tr|A0A078HS53|A0A078HS53_BRANA BnaC01g19960D protein OS=Brassica napus GN=BnaC01g19960D PE=3 SV=1;tr|A0A078J7N1|A0A078J7N1_BRANA BnaC07g50110D protein OS=Bras	87.834	788	2	1388600	289860	768070	815510	0	396710	0	132237	0	0	0	0	0	2014100	364800	792967	0	767170	0	255723	626050	0	0	208683	0	1645900	3130700	1592200	804470	2215800	1721400	1.58056e+06
A0A078EK36	At4g17830	Peptidase M20/M25/M40 family protein	tr|A0A078EK36|A0A078EK36_BRANA BnaC07g34860D protein OS=Brassica napus GN=BnaC07g34860D PE=4 SV=1;tr|A0A078DN44|A0A078DN44_BRANA BnaA03g43390D protein OS=Brassica napus GN=BnaA03g43390D PE=4 SV=1;tr|A0A078CUH2|A0A078CUH2_BRANA BnaA01g08700D protein OS=Bras	48.033	437	2	0	21388000	0	7.12933e+06	6248400	42434000	18786000	2.24895e+07	128720000	0	0	4.29067e+07	17269000	0	16106000	11125000	20849000	18345000	0	1.30647e+07	0	0	0	0	0	0	24972000	8324000	17031000	0	32960000	1.66637e+07
A0A078DN57	PPDK	Pyruvate, phosphate dikinase 1	tr|A0A078DN57|A0A078DN57_BRANA Pyruvate, phosphate dikinase OS=Brassica napus GN=BnaA03g41960D PE=3 SV=1;tr|A0A078J042|A0A078J042_BRANA Pyruvate, phosphate dikinase OS=Brassica napus GN=BnaCnng27780D PE=3 SV=1;tr|A0A078GCY5|A0A078GCY5_BRANA Pyruvate, phosp	103.92	955	4	12529000	109930000	93899000	7.21193e+07	0	0	3990800	1.33027e+06	36851000	153550000	0	63467000	25931000	44481000	23546000	3.13193e+07	56741000	53624000	0	3.67883e+07	0	31996000	70890000	3.42953e+07	7450200	13708000	0	7.05273e+06	13426000	22777000	39208000	25137000
A0A078GWW3	CP33	RNA-binding protein CP33	tr|A0A078GWW3|A0A078GWW3_BRANA BnaC07g32840D protein OS=Brassica napus GN=BnaC07g32840D PE=4 SV=1;tr|A0A078DN71|A0A078DN71_BRANA BnaA03g41760D protein OS=Brassica napus GN=BnaA03g41760D PE=4 SV=1	34.61	316	1	2263100	1576400	3415600	2.41837e+06	0	4530100	3894500	2808200	17031000	11348000	7322800	11900600	0	0	0	0	5499800	4108800	4303100	4.63723e+06	3346800	5671500	12563000	7.19377e+06	1054400	13403000	9385800	7.94773e+06	9596800	6878700	7288900	7.92147e+06
A0A078HB40	CLPR4	ATP-dependent Clp protease proteolytic subunit-related protein 4	tr|A0A078HB40|A0A078HB40_BRANA ATP-dependent Clp protease proteolytic subunit OS=Brassica napus GN=BnaC01g21270D PE=3 SV=1;tr|A0A078F9B0|A0A078F9B0_BRANA ATP-dependent Clp protease proteolytic subunit OS=Brassica napus GN=BnaC07g34090D PE=3 SV=1;tr|A0A078H	33.205	303	2	16673000	0	12280000	9651000	0	49182000	0	16394000	0	13095000	12635000	8.57667e+06	27298000	0	41358000	2.28853e+07	5507600	0	31115000	1.22075e+07	86667000	0	37960000	4.15423e+07	0	0	0	0	22412000	0	11549000	1.13203e+07
A0A078DNC6	PDH-E1 ALPHA	Pyruvate dehydrogenase E1 component subunit alpha-3	tr|A0A078DNC6|A0A078DNC6_BRANA Pyruvate dehydrogenase E1 component subunit alpha OS=Brassica napus GN=BnaA10g00730D PE=4 SV=1;tr|A0A078FQR6|A0A078FQR6_BRANA Pyruvate dehydrogenase E1 component subunit alpha OS=Brassica napus GN=BnaC05g00810D PE=4 SV=1;tr|A	46.932	426	3	15254000	13440000	8395100	1.2363e+07	3295300	21619000	35468000	2.01274e+07	6440400	10113000	1939100	6.16417e+06	1873500	0	11514000	4462500	5065200	7934700	4325200	5.77503e+06	0	9982100	15777000	8.58637e+06	0	29125000	21736000	1.69537e+07	5278400	13938000	20036000	1.30841e+07
A0A078DND2	ARGAH2	Arginase 2	tr|A0A078DND2|A0A078DND2_BRANA BnaA03g23800D protein OS=Brassica napus GN=BnaA03g23800D PE=3 SV=1;tr|A0A078EVR7|A0A078EVR7_BRANA BnaC03g28300D protein OS=Brassica napus GN=BnaC03g28300D PE=3 SV=1	37.375	342	3	19497000	5606800	4015400	9706400	4749300	5812200	1519300	4.02693e+06	6165000	8723700	12152000	9.01357e+06	4584000	8334500	17469000	1.01292e+07	7059700	7409500	6854300	7.10783e+06	6279100	0	8673600	4.98423e+06	0	0	0	0	38066000	5001200	115160000	52742400
Q00332	RPS15AA	40S ribosomal protein S15a-1	sp|Q00332|RS15A_BRANA 40S ribosomal protein S15a OS=Brassica napus GN=RPS15A PE=2 SV=3;tr|A0A078F818|A0A078F818_BRANA BnaA02g06730D protein OS=Brassica napus GN=BnaA02g06730D PE=3 SV=1;tr|A0A078EZA2|A0A078EZA2_BRANA BnaA06g18230D protein OS=Brassica napus	14.788	130	1	592270	232720	344840	389943	0	124120	231180	118433	983250	0	342520	441923	301550	1108000	865670	758407	0	0	0	0	1242200	1070000	285890	866030	0	669250	2936200	1.20182e+06	12371000	14925000	3052400	1.01161e+07
A0A078DNG8	LHCB5	Chlorophyll a-b binding protein CP26	tr|A0A078DNG8|A0A078DNG8_BRANA Chlorophyll a-b binding protein, chloroplastic OS=Brassica napus GN=BnaA03g24350D PE=3 SV=1;tr|A0A078EZK3|A0A078EZK3_BRANA Chlorophyll a-b binding protein, chloroplastic OS=Brassica napus GN=BnaC03g28960D PE=3 SV=1;tr|A0A078J	30.087	280	4	383230000	2084600000	803940000	1090590000	435470000	659050000	243460000	4.45993e+08	129200000	123010000	159620000	1.37277e+08	656180000	242760000	813170000	5.70703e+08	441340000	167420000	1376800000	6.61853e+08	645740000	553180000	533710000	5.77543e+08	498110000	196760000	650890000	4.48587e+08	589140000	1017300000	434480000	6.80307e+08
A0A078GQJ3	RPL17A	60S ribosomal protein L17-1	tr|A0A078GQJ3|A0A078GQJ3_BRANA BnaA09g27910D protein OS=Brassica napus GN=BnaA09g27910D PE=3 SV=1;tr|A0A078FFP1|A0A078FFP1_BRANA BnaC03g57660D protein OS=Brassica napus GN=BnaC03g57660D PE=3 SV=1;tr|A0A078DNK6|A0A078DNK6_BRANA BnaA08g19000D protein OS=Bras	20.983	185	2	418960000	0	903150000	4.40703e+08	186860000	83554000	0	90138000	834720000	270740000	0	3.68487e+08	0	65729000	18672000	2.81337e+07	0	0	0	0	239470000	267120000	221020000	2.42537e+08	139400000	91993000	268010000	1.66468e+08	355570000	0	0	1.18523e+08
A0A078E457	At3g52300	ATP synthase subunit d	tr|A0A078E457|A0A078E457_BRANA ATP synthase subunit d, mitochondrial OS=Brassica napus GN=BnaC04g28290D PE=3 SV=1;tr|A0A078DNQ5|A0A078DNQ5_BRANA ATP synthase subunit d, mitochondrial OS=Brassica napus GN=BnaA03g41740D PE=3 SV=1;tr|A0A078GU88|A0A078GU88_BRA	19.623	168	4	12562000	11033000	27460000	1.70183e+07	13931000	17418000	13267000	14872000	24265000	32181000	24881000	27109000	0	10825000	0	3.60833e+06	13191000	41521000	34322000	29678000	4627500	10283000	4253200	6387900	0	16259000	28563000	1.49407e+07	29087000	0	47739000	2.56087e+07
Q9ZSZ9	PAP1	Auxin-responsive protein	tr|Q9ZSZ9|Q9ZSZ9_BRANA Fibrillin (Fragment) OS=Brassica napus PE=2 SV=1;tr|A0A078DNQ6|A0A078DNQ6_BRANA BnaA03g25300D protein OS=Brassica napus GN=BnaA03g25300D PE=4 SV=1	25.873	237	1	0	0	0	0	0	0	0	0	4453600	8325400	2143500	4.97417e+06	108960000	0	0	36320000	0	0	0	0	24681000	5761500	4682100	11708200	0	0	0	0	0	0	0	0
A0A078FY57	petC	Cytochrome b6-f complex iron-sulfur subunit(EC 1.10.9.1)	tr|A0A078FY57|A0A078FY57_BRANA Cytochrome b6-f complex iron-sulfur subunit OS=Brassica napus GN=BnaC03g30230D PE=3 SV=1;tr|A0A078DNQ7|A0A078DNQ7_BRANA Cytochrome b6-f complex iron-sulfur subunit OS=Brassica napus GN=BnaA03g25710D PE=3 SV=1	24.583	231	3	935160000	6531100000	988710000	2.81832e+09	1333000000	2099800000	1103800000	1512200000	3215500000	3616400000	110640000	2314180000	889090000	1681700000	1587700000	1.38616e+09	1699500000	8434300000	3458600000	4530800000	1194600000	436310000	2403700000	1344870000	20942000000	698300000	2517100000	8.05247e+09	1659500000	1452200000	1013400000	1.37503e+09
A0A078EV09	At4g09620	Mitochondrial transcription termination factor family protein	tr|A0A078EV09|A0A078EV09_BRANA BnaC03g28640D protein OS=Brassica napus GN=BnaC03g28640D PE=4 SV=1;tr|A0A078DP20|A0A078DP20_BRANA BnaA03g24070D protein OS=Brassica napus GN=BnaA03g24070D PE=4 SV=1	23.343	210	1	1917800	1032400	1664300	1.53817e+06	0	225820	593860	273227	454180	0	636890	363690	706550	716510	0	474353	970100	0	0	323367	0	0	0	0	0	1495400	1926300	1.14057e+06	1145300	1544300	0	896533
A0A078DP62	MTN1	5'-methylthioadenosine/S-adenosylhomocysteine nucleosidase	tr|A0A078DP62|A0A078DP62_BRANA BnaA08g16900D protein OS=Brassica napus GN=BnaA08g16900D PE=4 SV=1;tr|A0A078FJ07|A0A078FJ07_BRANA BnaC03g60190D protein OS=Brassica napus GN=BnaC03g60190D PE=4 SV=1	29.272	273	2	5715100	0	2342200	2.68577e+06	6270300	0	4751400	3673900	3014500	4247800	3674000	3.64543e+06	3172500	0	4824900	2665800	8801200	4930900	0	4.57737e+06	0	0	0	0	0	9295400	9393400	6229600	60811000	26422000	12605000	3.32793e+07
A0A078JKV3	SVR3	Elongation factor family protein	tr|A0A078JKV3|A0A078JKV3_BRANA BnaA10g29870D protein OS=Brassica napus GN=BnaA10g29870D PE=4 SV=1;tr|A0A078DP92|A0A078DP92_BRANA BnaC02g04920D protein OS=Brassica napus GN=BnaC02g04920D PE=4 SV=1;tr|A0A078F8X1|A0A078F8X1_BRANA BnaC09g43450D protein OS=Bras	74.288	674	7	26190000	15100000	10312000	1.72007e+07	51850000	5930500	34811000	3.08638e+07	11323000	9381100	7905500	9.53653e+06	21667000	4765200	12544000	1.29921e+07	51180000	45823000	76159000	5.77207e+07	37161000	13023000	24766000	2.49833e+07	1222200000	25424000	47563000	431729000	48710000	32839000	65927000	4.91587e+07
A0A078I4I1	GDI2	Guanosine nucleotide diphosphate dissociation inhibitor 2 (AtGDI2)	tr|A0A078I4I1|A0A078I4I1_BRANA Guanosine nucleotide diphosphate dissociation inhibitor OS=Brassica napus GN=BnaC04g22610D PE=3 SV=1;tr|A0A078DPE4|A0A078DPE4_BRANA Guanosine nucleotide diphosphate dissociation inhibitor OS=Brassica napus GN=BnaA04g01480D PE	49.668	444	3	1744200	2995800	5360800	3.36693e+06	2737600	2709400	2047500	2.49817e+06	3217600	3823500	4094400	3.71183e+06	0	0	0	0	2699700	3216900	1409700	2442100	2036800	2013400	1513400	1.85453e+06	0	3012300	3644400	2218900	3950000	3956600	12442000	6.78287e+06
A0A075MAZ2	P5CSA	Delta-1-pyrroline-5-carboxylate synthase	tr|A0A075MAZ2|A0A075MAZ2_BRANA Delta-1-pyrroline-5-carboxylate synthase OS=Brassica napus GN=P5CS1 PE=3 SV=1;tr|Q9AXN4|Q9AXN4_BRANA Delta-1-pyrroline-5-carboxylate synthase OS=Brassica napus PE=2 SV=1;tr|A0A078G6B4|A0A078G6B4_BRANA Delta-1-pyrroline-5-carb	77.818	717	3	0	1137600	699050	612217	0	1929600	968390	965997	771210	0	2594300	1.12184e+06	10990000	3050900	0	4680300	5837100	0	1751200	2.52943e+06	0	8014900	0	2.67163e+06	17797000	0	997350	6.26478e+06	3041400	2600100	4358300	3.33327e+06
A0A078G931	VHA-F	V-type proton ATPase subunit F (V-ATPase subunit F)	tr|A0A078G931|A0A078G931_BRANA V-type proton ATPase subunit F OS=Brassica napus GN=BnaC09g00070D PE=3 SV=1;tr|A0A078FU19|A0A078FU19_BRANA V-type proton ATPase subunit F OS=Brassica napus GN=BnaC03g30820D PE=3 SV=1;tr|A0A078DPP0|A0A078DPP0_BRANA V-type prot	14.247	128	1	3444100	3060800	1978800	2827900	0	0	645410	215137	7373300	0	1066300	2813200	0	0	0	0	0	0	0	0	1070100	1768300	415630	1.08468e+06	0	2040800	5336300	2.45903e+06	9618000	8974800	665990	6.4196e+06
A0A078DPS3	CP29B	RNA-binding protein CP29B	tr|A0A078DPS3|A0A078DPS3_BRANA BnaC04g08050D protein OS=Brassica napus GN=BnaC04g08050D PE=4 SV=1;tr|A0A078CIV5|A0A078CIV5_BRANA BnaA05g07240D protein OS=Brassica napus GN=BnaA05g07240D PE=4 SV=1	30.656	290	2	0	0	1874700	624900	0	5764200	11509000	5.75773e+06	1354700	2841800	3079800	2.42543e+06	4512400	1910500	1506200	2.64303e+06	0	6015800	4296100	3437300	86845000	11560000	0	3.28017e+07	47632000	11253000	13625000	24170000	53339000	77508000	15060000	4.86357e+07
A0A078JAE5	RPL15B	60S ribosomal protein L15-2	tr|A0A078JAE5|A0A078JAE5_BRANA Ribosomal protein L15 OS=Brassica napus GN=BnaC01g41720D PE=3 SV=1;tr|A0A078J864|A0A078J864_BRANA Ribosomal protein L15 OS=Brassica napus GN=BnaCnng35130D PE=3 SV=1;tr|A0A078DTE3|A0A078DTE3_BRANA Ribosomal protein L15 OS=Bras	21.523	178	1	0	0	1854800	618267	51823000	0	9444500	20422500	3687200	1981100	2827200	2.83183e+06	2139700	0	4507300	2.21567e+06	2943200	10043000	0	4.32873e+06	0	0	11892000	3964000	0	2023600	9415200	3.81293e+06	0	3719000	0	1.23967e+06
A0A078F8Q1	NUDT6	Nudix hydrolase 6 (AtNUDT6) (EC 3.6.1.-)	tr|A0A078F8Q1|A0A078F8Q1_BRANA BnaC07g33400D protein OS=Brassica napus GN=BnaC07g33400D PE=4 SV=1;tr|A0A078DQ46|A0A078DQ46_BRANA BnaA03g42320D protein OS=Brassica napus GN=BnaA03g42320D PE=4 SV=1	31.35	277	1	0	0	0	0	0	0	0	0	0	0	0	0	0	0	0	0	0	0	0	0	4435500	9826300	0	4.75393e+06	0	594200	925770	506657	3026300	0	2542300	1856200
A0A078FVF7	At5g49900	Beta-glucosidase, GBA2 type family protein	tr|A0A078FVF7|A0A078FVF7_BRANA BnaA02g12020D protein OS=Brassica napus GN=BnaA02g12020D PE=4 SV=1;tr|A0A078DQF0|A0A078DQF0_BRANA BnaC02g16490D protein OS=Brassica napus GN=BnaC02g16490D PE=4 SV=1	35.801	325	3	31746000	0	0	10582000	32576000	0	59572000	30716000	37100000	8272700	7667000	17679900	15016000	71795000	112610000	6.64737e+07	0	15697000	131040000	4.89123e+07	0	38729000	34263000	2.43307e+07	0	12051000	15964000	9.33833e+06	10352000	20559000	0	1.03037e+07
A0A078DQH7	TL29	Thylakoid lumenal 29 kDa protein	tr|A0A078DQH7|A0A078DQH7_BRANA BnaA03g23840D protein OS=Brassica napus GN=BnaA03g23840D PE=3 SV=1	37.842	348	1	45611000	0	0	1.52037e+07	0	77483000	62386000	46623000	37117000	0	0	1.23723e+07	31878000	86628000	31783000	5.00963e+07	77880000	0	40334000	3.94047e+07	130180000	96966000	47854000	9.16667e+07	183910000	0	24875000	69595000	79498000	0	52130000	43876000
A0A078DQL6	At5g11420	Putative uncharacterized protein	tr|A0A078DQL6|A0A078DQL6_BRANA BnaC02g03800D protein OS=Brassica napus GN=BnaC02g03800D PE=4 SV=1	39.798	366	1	0	0	0	0	2601000	0	0	867000	0	0	1630100	543367	0	0	0	0	0	0	0	0	0	0	0	0	0	0	0	0	0	0	0	0
A0A078DQX4	ATPC1	ATP synthase gamma chain 1(F-ATPase gamma subunit 1)	tr|A0A078DQX4|A0A078DQX4_BRANA BnaA03g25540D protein OS=Brassica napus GN=BnaA03g25540D PE=3 SV=1;tr|A0A078FUG8|A0A078FUG8_BRANA BnaA09g20320D protein OS=Brassica napus GN=BnaA09g20320D PE=3 SV=1;tr|A0A078E1U0|A0A078E1U0_BRANA BnaC09g22670D protein OS=Bras	41.097	374	5	1820500000	121650000	259010000	733720000	1061700000	3007400000	1177000000	1748700000	206540000	148820000	263100000	2.06153e+08	281010000	1789100000	729490000	933200000	1475800000	1106000000	1948700000	1.51017e+09	364710000	510920000	719610000	5.31747e+08	196710000	990070000	1018400000	735060000	725960000	90643000	389240000	4.01948e+08
A0A078HYS1	ANN1	Annexin D1 (AnnAt1) (Annexin A1)	tr|A0A078HYS1|A0A078HYS1_BRANA Annexin OS=Brassica napus GN=BnaA08g06260D PE=3 SV=1;tr|A0A078DR00|A0A078DR00_BRANA Annexin OS=Brassica napus GN=BnaC08g06690D PE=3 SV=1	36.161	317	1	0	0	0	0	0	0	0	0	10333000	23398000	0	1.12437e+07	0	14565000	0	4855000	0	0	0	0	0	0	0	0	0	0	0	0	142120000	0	0	4.73733e+07
A0A078EM60	APX5	L-ascorbate peroxidase 5	tr|A0A078EM60|A0A078EM60_BRANA BnaA03g39250D protein OS=Brassica napus GN=BnaA03g39250D PE=3 SV=1;tr|A0A078DRD5|A0A078DRD5_BRANA BnaC03g46570D protein OS=Brassica napus GN=BnaC03g46570D PE=3 SV=1;tr|A0A078HSG4|A0A078HSG4_BRANA BnaA03g53120D protein OS=Bras	31.698	288	2	57703000	68436000	92648000	72929000	22980000	80079000	0	34353000	0	0	0	0	62563000	4471200	7927100	24987100	0	0	45402000	15134000	7669900	13144000	18748000	13187300	1475300000	0	86659000	520653000	0	38399000	76183000	38194000
A0A078DRN6	HSP17.6	17.6 kDa class II heat shock protein	tr|A0A078DRN6|A0A078DRN6_BRANA BnaC02g04180D protein OS=Brassica napus GN=BnaC02g04180D PE=3 SV=1;tr|A0A078C0F0|A0A078C0F0_BRANA BnaC03g05240D protein OS=Brassica napus GN=BnaC03g05240D PE=3 SV=1	17.574	154	2	12065000	14779000	17132000	1.46587e+07	0	582020	393760	325260	0	0	0	0	0	0	0	0	979730	0	0	326577	71700	0	112260	61320	0	0	0	0	278360	286170	290610	285047
A0A078J560	NADP-ME2	NADP-dependent malic enzyme 2(EC 1.1.1.40)	tr|A0A078J560|A0A078J560_BRANA Malic enzyme OS=Brassica napus GN=BnaA02g35010D PE=3 SV=1;tr|A0A078DRQ2|A0A078DRQ2_BRANA Malic enzyme OS=Brassica napus GN=BnaC02g03980D PE=3 SV=1	64.479	588	1	36533000	0	0	1.21777e+07	0	29707000	28647000	1.94513e+07	0	0	0	0	0	0	0	0	0	0	0	0	39099000	32300000	45718000	39039000	111300000	0	15285000	42195000	30031000	0	0	1.00103e+07
A0A078JCY6	At1g52730	Transducin/WD40 repeat-like superfamily protein	tr|A0A078JCY6|A0A078JCY6_BRANA BnaA05g35670D protein OS=Brassica napus GN=BnaA05g35670D PE=4 SV=1;tr|A0A078J5V1|A0A078J5V1_BRANA BnaC06g41840D protein OS=Brassica napus GN=BnaC06g41840D PE=4 SV=1;tr|A0A078J9K6|A0A078J9K6_BRANA BnaA06g01530D protein OS=Bras	36.082	330	1	729900	1430600	1550600	1.23703e+06	0	653690	762880	472190	1551700	584730	1251900	1.12944e+06	999600	445290	411250	618713	1233500	1210500	522810	988937	172700	348160	333540	284800	0	0	625640	208547	2021900	1878800	1499400	1.80003e+06
A0A078E3E9	AAE7	Acetate/butyrate--CoA ligase	tr|A0A078E3E9|A0A078E3E9_BRANA BnaC05g36470D protein OS=Brassica napus GN=BnaC05g36470D PE=4 SV=1;tr|A0A078DS48|A0A078DS48_BRANA BnaA05g23020D protein OS=Brassica napus GN=BnaA05g23020D PE=4 SV=1	62.789	569	1	630650	714010	0	448220	0	0	0	0	414630	0	0	138210	7568900	0	0	2.52297e+06	0	0	2953400	984467	0	0	0	0	471500000	0	0	1.57167e+08	0	33158000	32644000	21934000
A0A078HVL1	RPL21	50S ribosomal protein L21(CL21)	tr|A0A078HVL1|A0A078HVL1_BRANA BnaA08g06270D protein OS=Brassica napus GN=BnaA08g06270D PE=3 SV=1;tr|A0A078DS61|A0A078DS61_BRANA BnaC08g06710D protein OS=Brassica napus GN=BnaC08g06710D PE=3 SV=1	22.027	203	2	1437800	2729300	3178700	2448600	2629000	4573700	3609300	3604000	6882600	4704200	3618800	5.06853e+06	540150	610360	471150	540553	1377000	913580	1256600	1.18239e+06	2850000	3194400	0	2014800	0	834260	2071400	968553	1808700	1030100	2021700	1.62017e+06
A0A078DS74	LPD2	Dihydrolipoyl dehydrogenase 2	tr|A0A078DS74|A0A078DS74_BRANA Dihydrolipoyl dehydrogenase OS=Brassica napus GN=BnaA05g22860D PE=3 SV=1;tr|A0A078E5J4|A0A078E5J4_BRANA Dihydrolipoyl dehydrogenase OS=Brassica napus GN=BnaC05g36150D PE=3 SV=1	53.558	504	1	0	0	0	0	0	0	6673700	2.22457e+06	0	3408300	2846600	2.08497e+06	0	0	0	0	3741800	0	7886300	3.87603e+06	7534200	0	9957500	5.83057e+06	0	0	0	0	0	0	0	0
A0A078J017	APT1	Adenine phosphoribosyl transferase 1	tr|A0A078J017|A0A078J017_BRANA BnaC05g51080D protein OS=Brassica napus GN=BnaC05g51080D PE=3 SV=1;tr|A0A078GR38|A0A078GR38_BRANA BnaA09g27900D protein OS=Brassica napus GN=BnaA09g27900D PE=3 SV=1;tr|Q7XJC2|Q7XJC2_BRANA Adenine phosphoribosyltransferase (Fr	19.957	185	4	7768100	9623900	17733000	1.17083e+07	5096200	9270000	7037600	7134600	9495800	11700000	19739000	1.36449e+07	22412000	13917000	0	1.21097e+07	32361000	4768400	3251600	1.34603e+07	39056000	34917000	44597000	3.95233e+07	292240000	36880000	28260000	1.19127e+08	37962000	30138000	33660000	33920000
A0A078E5D5	RACK1B	Receptor for activated C kinase 1B	tr|A0A078E5D5|A0A078E5D5_BRANA BnaC05g35350D protein OS=Brassica napus GN=BnaC05g35350D PE=4 SV=1;tr|A0A078DSD9|A0A078DSD9_BRANA BnaA05g22070D protein OS=Brassica napus GN=BnaA05g22070D PE=4 SV=1;tr|A0A078G0H0|A0A078G0H0_BRANA BnaA01g26980D protein OS=Bras	35.534	325	5	102190000	31338000	81306000	7.16113e+07	102650000	309350000	148930000	1.86977e+08	35838000	68140000	109320000	7.10993e+07	13548000	55682000	40105000	36445000	91906000	287880000	105380000	161722000	81287000	127660000	179190000	129379000	6644300	155570000	241400000	134538100	141900000	77264000	196700000	1.38621e+08
A0A078GIN3	ASPG1	Protein ASPARTIC PROTEASE IN GUARD CELL 1 (EC 3.4.23.-)	tr|A0A078GIN3|A0A078GIN3_BRANA BnaC05g34710D protein OS=Brassica napus GN=BnaC05g34710D PE=3 SV=1;tr|A0A078DSH3|A0A078DSH3_BRANA BnaA05g21670D protein OS=Brassica napus GN=BnaA05g21670D PE=3 SV=1	51.844	491	2	1454000	0	0	484667	0	0	0	0	1112900	1262800	1094800	1.15683e+06	0	0	681430	227143	0	0	0	0	0	7051100	8725400	5.25883e+06	6518300	0	1182400	2566900	4416800	3763200	3925800	4.03527e+06
Q9S9F9	LTP2	Non-specific lipid-transfer protein 2	tr|Q9S9F9|Q9S9F9_BRANA Non-specific lipid-transfer protein OS=Brassica napus PE=3 SV=1;sp|Q42616|NLTP3_BRANA Non-specific lipid-transfer protein 3 OS=Brassica napus GN=LTP3 PE=3 SV=1;tr|A0A078DSI9|A0A078DSI9_BRANA Non-specific lipid-transfer protein OS=Bra	9.4149	93	1	0	0	8372900	2.79097e+06	0	163080000	312770000	1.58617e+08	3528500	3321900	2458800	3.10307e+06	192600000	59314000	133580000	128498000	0	22678000	27138000	1.66053e+07	0	29718000	72312000	34010000	0	72298000	63766000	4.53547e+07	94132000	144880000	217400000	1.52137e+08
A0A078FTP4	MTACP2	Acyl carrier protein 2	tr|A0A078FTP4|A0A078FTP4_BRANA Acyl carrier protein OS=Brassica napus GN=BnaA02g12050D PE=3 SV=1;tr|A0A078DSN9|A0A078DSN9_BRANA Acyl carrier protein OS=Brassica napus GN=BnaC02g16510D PE=3 SV=1	14.55	131	1	30413000	0	0	1.01377e+07	39247000	32801000	49860000	40636000	97726000	26625000	0	4.14503e+07	0	9910000	5424000	5.11133e+06	39839000	0	31961000	2.39333e+07	43899000	0	19467000	21122000	0	0	19701000	6567000	0	0	0	0
A0A078JIF1	ATJ3	Chaperone protein dnaJ 3	tr|A0A078JIF1|A0A078JIF1_BRANA BnaCnng47600D protein OS=Brassica napus GN=BnaCnng47600D PE=3 SV=1;tr|A0A078DSZ0|A0A078DSZ0_BRANA BnaA10g14250D protein OS=Brassica napus GN=BnaA10g14250D PE=3 SV=1;tr|A0A078DSR2|A0A078DSR2_BRANA BnaA10g14240D protein OS=Bras	46.383	421	2	125540000	117320000	156430000	1.33097e+08	0	0	43795000	1.45983e+07	241760000	244590000	86064000	1.90805e+08	0	98792000	89458000	62750000	338480000	0	32733000	1.23738e+08	0	0	0	0	0	0	0	0	22675000	12710000	36333000	23906000
A0A078JZ77	PDS	15-cis-phytoene desaturase/chromoplastic (EC 1.3.5.5)	tr|A0A078JZ77|A0A078JZ77_BRANA BnaCnng70650D protein OS=Brassica napus GN=BnaCnng70650D PE=4 SV=1;tr|A0A078DSV5|A0A078DSV5_BRANA BnaA08g17160D protein OS=Brassica napus GN=BnaA08g17160D PE=4 SV=1;tr|A0A0K0K5D3|A0A0K0K5D3_BRANA Chloroplast phytoene desatura	18.672	165	2	0	0	0	0	0	0	0	0	0	0	0	0	0	1103200	0	367733	0	2093000	10567000	4220000	0	15691000	0	5.23033e+06	0	5371900	16536000	7.30263e+06	4429900	2342000	4387400	3.71977e+06
A0A078DT11	SAMC1	S-adenosylmethionine carrier 1	tr|A0A078DT11|A0A078DT11_BRANA BnaA08g16510D protein OS=Brassica napus GN=BnaA08g16510D PE=3 SV=1;tr|A0A078IIU7|A0A078IIU7_BRANA BnaC02g44060D protein OS=Brassica napus GN=BnaC02g44060D PE=3 SV=1	39.058	363	1	0	0	0	0	0	0	0	0	0	0	0	0	0	0	0	0	0	0	0	0	0	0	1021400	340467	16548000	0	0	5516000	0	570570	0	190190
Q9AXN5	PLAT1	PLAT domain-containing protein 1 (AtPLAT1)	tr|Q9AXN5|Q9AXN5_BRANA BnaC03g76260D protein OS=Brassica napus GN=BnaC03g76260D PE=2 SV=1;tr|A0A078DT21|A0A078DT21_BRANA BnaA08g16310D protein OS=Brassica napus GN=BnaA08g16310D PE=4 SV=1	19.728	178	1	0	45699000	0	15233000	0	0	0	0	156770000	0	0	5.22567e+07	193550000	120320000	0	1.04623e+08	0	0	0	0	27035000	0	0	9.01167e+06	715500000	0	47366000	2.54289e+08	86124000	188580000	58168000	1.10957e+08
A0A078JGW9	ASP2	Aspartate aminotransferase isozyme 1	tr|A0A078JGW9|A0A078JGW9_BRANA Aspartate aminotransferase OS=Brassica napus GN=BnaC09g54080D PE=4 SV=1;tr|A0A078I246|A0A078I246_BRANA Aspartate aminotransferase OS=Brassica napus GN=BnaA02g04300D PE=4 SV=1;tr|A0A078HWZ7|A0A078HWZ7_BRANA Aspartate aminotran	44.207	405	2	2481500	2133400	3370100	2.66167e+06	161690	1887200	2736200	1595030	11638000	3228600	14350000	9.73887e+06	2969300	1780700	2503300	2.41777e+06	3414300	2486100	637960	2.17945e+06	1479500	453060	0	644187	0	2344300	1411000	1.25177e+06	7207600	8965100	9106900	8.42653e+06
A0A078HDM1	At5g19860	At5g19860	tr|A0A078HDM1|A0A078HDM1_BRANA BnaC09g37830D protein OS=Brassica napus GN=BnaC09g37830D PE=4 SV=1;tr|A0A078DT94|A0A078DT94_BRANA BnaA10g15350D protein OS=Brassica napus GN=BnaA10g15350D PE=4 SV=1	20.323	182	1	0	17815000	0	5.93833e+06	0	10093000	0	3.36433e+06	0	18712000	0	6.23733e+06	0	10276000	11519000	7265000	22670000	17688000	0	1.34527e+07	8044600	6830900	0	4958500	0	0	0	0	0	9430800	0	3143600
A0A078J4C5	ALDH2B7	Aldehyde dehydrogenase 2B7	tr|A0A078J4C5|A0A078J4C5_BRANA BnaA08g20300D protein OS=Brassica napus GN=BnaA08g20300D PE=3 SV=1;tr|A0A078DTA8|A0A078DTA8_BRANA BnaC08g06430D protein OS=Brassica napus GN=BnaC08g06430D PE=3 SV=1;tr|A0A078JB23|A0A078JB23_BRANA BnaA09g29890D protein (Fragme	58.586	537	9	37395000	62893000	99574000	6.66207e+07	53746000	47240000	54760000	5.19153e+07	117510000	153930000	108010000	1.26483e+08	253330000	208700000	54029000	1.7202e+08	106160000	116650000	182110000	1.34973e+08	102140000	93709000	63496000	8.64483e+07	85312000	127450000	44238000	8.56667e+07	151920000	224800000	115160000	163960000
A0A078JHB1	RABD2C	Ras-related protein RABD2c	tr|A0A078JHB1|A0A078JHB1_BRANA BnaA08g08340D protein OS=Brassica napus GN=BnaAnng21250D PE=4 SV=1;tr|A0A078HTE7|A0A078HTE7_BRANA BnaA02g25090D protein OS=Brassica napus GN=BnaC02g33280D PE=4 SV=1;tr|A0A078H6P5|A0A078H6P5_BRANA BnaA06g35520D protein OS=Bras	22.323	202	1	0	0	0	0	0	2077800	2171000	1.41627e+06	0	0	0	0	0	0	0	0	0	0	0	0	0	3383300	0	1.12777e+06	0	0	0	0	1919000	0	58840000	20253000
A0A078DTG9	ADG2	Glucose-1-phosphate adenylyltransferase large subunit 1	tr|A0A078DTG9|A0A078DTG9_BRANA Glucose-1-phosphate adenylyltransferase OS=Brassica napus GN=BnaA10g15850D PE=3 SV=1;tr|A0A078JN33|A0A078JN33_BRANA Glucose-1-phosphate adenylyltransferase OS=Brassica napus GN=BnaC09g54280D PE=3 SV=1	56.845	516	3	37902000	0	4839800	1.42473e+07	39883000	32423000	152710000	7.50053e+07	17231000	14531000	20928000	1.75633e+07	417320000	229220000	112280000	252940000	0	0	0	0	32114000	267200000	74556000	1.24623e+08	0	344630000	105110000	1.49913e+08	120380000	130350000	0	8.35767e+07
A0A078FFY9	T19F6.7	T19F6.7 protein	tr|A0A078FFY9|A0A078FFY9_BRANA BnaA03g46470D protein OS=Brassica napus GN=BnaA03g46470D PE=4 SV=1;tr|A0A078DTM4|A0A078DTM4_BRANA BnaC07g38740D protein OS=Brassica napus GN=BnaC07g38740D PE=4 SV=1	17.951	157	2	2029300	3315300	5409900	3.58483e+06	674080	5554600	5956400	4.06169e+06	1104900	489780	932430	842370	0	0	0	0	417340	270350	241990	309893	2429600	2399200	2941500	2590100	0	1075600	5410300	2.16197e+06	2051300	894050	2190200	1711850
A0A078DTM6	CLPT1	ATP-dependent Clp protease ATP-binding subunit CLPT1	tr|A0A078DTM6|A0A078DTM6_BRANA BnaC07g39580D protein OS=Brassica napus GN=BnaC07g39580D PE=4 SV=1;tr|A0A078IKV1|A0A078IKV1_BRANA BnaA03g47340D protein OS=Brassica napus GN=BnaA03g47340D PE=4 SV=1;tr|A0A078J4A7|A0A078J4A7_BRANA BnaC06g41220D protein OS=Bras	25.401	232	2	0	0	0	0	0	15519000	29048000	1.48557e+07	0	0	0	0	0	226710000	13939000	8.02163e+07	133750000	0	0	4.45833e+07	0	0		0	0	16086000	0	5362000	7329700	28332000	18182000	17947900
A0A078FUA8	SUS1	Sucrose synthase 1 (EC 2.4.1.13)	tr|A0A078FUA8|A0A078FUA8_BRANA Sucrose synthase OS=Brassica napus GN=BnaC09g37040D PE=3 SV=1;tr|A0A078DU40|A0A078DU40_BRANA Sucrose synthase OS=Brassica napus GN=BnaA10g14710D PE=3 SV=1;tr|A0A078DNP2|A0A078DNP2_BRANA Sucrose synthase OS=Brassica napus GN=B	92.3	805	2	269340	466380	0	245240	0	0	924750	308250	0	0	0	0	10651000	0	0	3.55033e+06	0	0	5072400	1690800	0	0	6671300	2.22377e+06	54404000	0	7180900	20528300	4856600	3899900	4395300	4.38393e+06
A0A078DU76	At4g28940	Phosphorylase superfamily protein	tr|A0A078DU76|A0A078DU76_BRANA BnaC07g41630D protein OS=Brassica napus GN=BnaC07g41630D PE=4 SV=1	38.534	349	4	33052000	12916000	26687000	2.42183e+07	0	13226000	13970000	9.06533e+06	13051000	7664200	0	6.90507e+06	3516500	2898500	0	2.13833e+06	1383900	0	1237800	873900	31568000	720920	0	1.0763e+07	4747700	0	8365600	4371100	0	0	1233600	411200
G1EIM3	HSP22.0	22.0 kDa heat shock protein (AtHsp22.0)	tr|G1EIM3|G1EIM3_BRANA HSP22 OS=Brassica napus GN=HSP22 PE=3 SV=1;tr|G1EIM2|G1EIM2_BRANA BnaC03g28860D protein OS=Brassica napus GN=HSP22 PE=3 SV=1;tr|A0A078DU85|A0A078DU85_BRANA BnaA03g24280D protein OS=Brassica napus GN=BnaA03g24280D PE=3 SV=1	22.274	197	3	59619000	53163000	71662000	6.14813e+07	0	0	4094400	1364800	0	0	0	0	0	0	20611000	6.87033e+06	3430200	7828600	0	3.75293e+06	0	9307200	0	3102400	0	6832500	15870000	7567500	0	21335000	13205000	1.15133e+07
A0A078JRB4	VHA-E1	V-type proton ATPase subunit E1	tr|A0A078JRB4|A0A078JRB4_BRANA BnaCnng57990D protein OS=Brassica napus GN=BnaCnng57990D PE=3 SV=1;tr|A0A078JMF5|A0A078JMF5_BRANA BnaC03g72900D protein OS=Brassica napus GN=BnaC03g72900D PE=3 SV=1;tr|A0A078DU97|A0A078DU97_BRANA BnaA03g24530D protein OS=Bras	25.873	230	1	24674000	0	9071300	1.12484e+07	7790800	0	8132100	5.30763e+06	7722900	0	0	2574300	6696600	17415000	0	8037200	11212000	19489000	13937000	1.48793e+07	0	8211800	9227200	5813000	0	11525000	4594200	5.37307e+06	0	6475600	0	2.15853e+06
A0A078I4Y4	TUBA3	Tubulin alpha-3 chain	tr|A0A078I4Y4|A0A078I4Y4_BRANA Tubulin alpha chain OS=Brassica napus GN=BnaA02g04460D PE=3 SV=1;tr|A0A078HY73|A0A078HY73_BRANA Tubulin alpha chain OS=Brassica napus GN=BnaC02g09000D PE=3 SV=1;tr|A0A078DUC1|A0A078DUC1_BRANA Tubulin alpha chain OS=Brassica n	49.698	450	5	59625000	17090000	50979000	4.25647e+07	11855000	28173000	22801000	20943000	25351000	60027000	50923000	4.54337e+07	48022000	20839000	35606000	3.48223e+07	10391000	171750000	51039000	7.77267e+07	0	0	0	0	19681000	12872000	17498000	1.66837e+07	35685000	46261000	93292000	5.84127e+07
A0A078DUN5	At3g17770	Dihydroxyacetone kinase	tr|A0A078DUN5|A0A078DUN5_BRANA BnaA05g22480D protein OS=Brassica napus GN=BnaA05g22480D PE=4 SV=1;tr|A0A078E8U9|A0A078E8U9_BRANA BnaC05g35740D protein OS=Brassica napus GN=BnaC05g35740D PE=4 SV=1	61.944	595	1	0	0	0	0	0	0	0	0	0	0	0	0	0	0	0	0	0	0	0	0	0	0	0	0	0	100900	0	33633.3	0	0	0	0
A0A078FDP4	PGI1	Glucose-6-phosphate isomerase 1(GPI 1) (EC 5.3.1.9)	tr|A0A078FDP4|A0A078FDP4_BRANA Glucose-6-phosphate isomerase OS=Brassica napus GN=BnaA03g46830D PE=3 SV=1;tr|A0A078DUQ8|A0A078DUQ8_BRANA Glucose-6-phosphate isomerase OS=Brassica napus GN=BnaC07g39050D PE=3 SV=1;tr|A0A078ERY1|A0A078ERY1_BRANA Glucose-6-pho	66.84	613	5	163520000	400730000	126380000	230210000	63079000	139310000	176130000	126173000	14429000	178250000	248200000	1.4696e+08	264100000	101920000	106440000	1.57487e+08	111570000	318860000	190550000	2.06993e+08	0	0	0	0	0	29221000	130340000	53187000	105930000	61808000	96492000	8.80767e+07
A0A078DUR3	At4g24830	Argininosuccinate synthase	tr|A0A078DUR3|A0A078DUR3_BRANA BnaC07g39150D protein OS=Brassica napus GN=BnaC07g39150D PE=3 SV=1;tr|A0A078H970|A0A078H970_BRANA BnaA01g14190D protein OS=Brassica napus GN=BnaA01g14190D PE=3 SV=1;tr|A0A078EV00|A0A078EV00_BRANA BnaC01g16690D protein OS=Bras	59.172	541	4	22627000	4265500	41191000	22694500	27324000	7874800	29454000	2.15509e+07	26927000	11622000	5052900	1.4534e+07	42229000	28963000	8450900	2.65476e+07	17195000	0	27969000	1.50547e+07	51147000	33959000	42767000	4.26243e+07	34672000	27964000	4114700	2.22502e+07	22204000	19387000	8677600	16756200
A0A078ILZ0	MOD1	Enoyl-[acyl-carrier-protein] reductase [NADH](ENR) (EC 1.3.1.9)	tr|A0A078ILZ0|A0A078ILZ0_BRANA BnaC03g45040D protein OS=Brassica napus GN=BnaC03g45040D PE=4 SV=1;tr|Q93X64|Q93X64_BRANA Enoyl-[acyl-carrier protein] reductase OS=Brassica napus GN=enrB1 PE=2 SV=1;tr|Q93X63|Q93X63_BRANA Enoyl-[acyl carrier-protein] reducta	40.302	382	1	0	0	0	0	0	42641000	8264000	1.69683e+07	0	0	0	0	19990000	0	0	6.66333e+06	0	0	26162000	8.72067e+06	13318000	35528000	4576400	1.78075e+07	0	0	35100000	11700000	30989000	44614000	97565000	5.77227e+07
A0A078FU78	PGR5	Protein PROTON GRADIENT REGULATION 5	tr|A0A078FU78|A0A078FU78_BRANA BnaC07g04150D protein OS=Brassica napus GN=BnaC07g04150D PE=4 SV=1;tr|A0A078DUX6|A0A078DUX6_BRANA BnaA03g38080D protein OS=Brassica napus GN=BnaA03g38080D PE=4 SV=1;tr|A0A078ILW9|A0A078ILW9_BRANA BnaC03g74470D protein OS=Bras	14.222	131	2	30521000	54183000	46521000	4.37417e+07	0	78712000	180530000	86414000	40959000	36659000	173620000	83746000	71641000	0	0	2.38803e+07	64048000	16870000	126340000	69086000	111810000	104760000	85670000	1.00747e+08	0	67547000	28823000	3.21233e+07	31788000	546670000	122940000	2.33799e+08
A0A078DUY8	At2g12400	Plasma membrane fusion protein	tr|A0A078DUY8|A0A078DUY8_BRANA BnaA03g38280D protein OS=Brassica napus GN=BnaA03g38280D PE=4 SV=1;tr|A0A078ILY2|A0A078ILY2_BRANA BnaC03g45140D protein OS=Brassica napus GN=BnaC03g45140D PE=4 SV=1	58.76	525	1	0	0	0	0	0	0	0	0	0	0	0	0	0	0	2717100	905700	0	0	1607700	535900	0	0	0	0	0	0	837510	279170	11242000	7381200	2364500	6995900
A0A078EY12	HEME2	Uroporphyrinogen decarboxylase 2	tr|A0A078EY12|A0A078EY12_BRANA Uroporphyrinogen decarboxylase OS=Brassica napus GN=BnaA04g23300D PE=3 SV=1;tr|A0A078DV07|A0A078DV07_BRANA Uroporphyrinogen decarboxylase OS=Brassica napus GN=BnaC04g47210D PE=3 SV=1	43.11	390	1	991000	1084700	1706000	1.26057e+06	3805100	0	21587000	8.46403e+06	0	0	0	0	3727000	0	9056400	4.26113e+06	24425000	9570400	4327200	12774200	29789000	29700000	0	1.98297e+07	89593000	5393500	0	3.16622e+07	8767000	15331000	9968100	1.13554e+07
A0A078DV80	RCA	Ribulose bisphosphate carboxylase/oxygenase activase	tr|A0A078DV80|A0A078DV80_BRANA BnaC04g46560D protein OS=Brassica napus GN=BnaC04g46560D PE=4 SV=1	48.098	439	5	1574100000	7870500000	5458700000	4.96777e+09	4395100000	5980400000	12386000000	7.58717e+09	2213100000	2191300000	588640000	1.66435e+09	3042100000	4495600000	2656600000	3398100000	6460100000	1043100000	3107500000	3536900000	11070000000	11080000000	7545100000	9.89837e+09	13009000000	5144600000	8225600000	8.79307e+09	1668000000	1615600000	2477600000	1920400000
A0A078FUD9	ndhU	NAD(P)H-quinone oxidoreductase subunit U(EC 1.6.5.-)	tr|A0A078FUD9|A0A078FUD9_BRANA BnaC09g36720D protein OS=Brassica napus GN=BnaC09g36720D PE=4 SV=1;tr|A0A078DVB3|A0A078DVB3_BRANA BnaA10g14380D protein OS=Brassica napus GN=BnaA10g14380D PE=4 SV=1	24.287	217	1	0	0	0	0	8196600	5283100	0	4.49323e+06	0	0	0	0	14006000	9300900	0	7.76897e+06	0	0	0	0	0	10789000	0	3.59633e+06	0	0	55435000	1.84783e+07	7289000	3075000	0	3.45467e+06
A0A078DVL1	LTP1	Non-specific lipid-transfer protein 1	tr|A0A078DVL1|A0A078DVL1_BRANA Non-specific lipid-transfer protein OS=Brassica napus GN=BnaC04g45800D PE=3 SV=1	11.826	118	1	50951000	0	120260000	5.70703e+07	215900000	0	433480000	216460000	283390000	128490000	237700000	2.16527e+08	48996000	0	235980000	94992000	63127000	372320000	144320000	1.93256e+08	0	0	22185000	7395000	0	0	52785000	17595000	0	26873000	0	8.95767e+06
Q93Y50	CAC2	Acetyl Co-enzyme a carboxylase biotin carboxylase subunit	tr|Q93Y50|Q93Y50_BRANA Biotin carboxylase OS=Brassica napus PE=2 SV=1;tr|D9I764|D9I764_BRANA Chloroplast biotin carboxylase OS=Brassica napus GN=BnaC.BC.a PE=4 SV=1;tr|A0A078E676|A0A078E676_BRANA BnaC05g07580D protein OS=Brassica napus GN=BnaC05g07580D PE=	58.413	535	9	350410000	25562000	45297000	140423000	91336000	34378000	70722000	6.54787e+07	31484000	44336000	21623000	32481000	9587600	15125000	37326000	2.06795e+07	42605000	18898000	30260000	3.05877e+07	31372000	19523000	12977000	2.12907e+07	422580000	7636200	13539000	147918400	3502000	16199000	7209100	8.97003e+06
A0A078FY34	PGPS2	CDP-diacylglycerol--glycerol-3-phosphate 3-phosphatidyltransferase 2 (EC 2.7.8.5)	tr|A0A078FY34|A0A078FY34_BRANA BnaC03g30910D protein OS=Brassica napus GN=BnaC03g30910D PE=4 SV=1;tr|A0A078DVR5|A0A078DVR5_BRANA BnaC02g27290D protein OS=Brassica napus GN=BnaC02g27290D PE=4 SV=1;tr|A0A078E5D0|A0A078E5D0_BRANA BnaA02g20560D protein OS=Bras	32.538	304	2	114680000	0	0	3.82267e+07	144520000	123360000	37269000	1.01716e+08	333410000	0	0	1.11137e+08	13965000	0	0	4655000	0	0	113740000	3.79133e+07	101020000	0	0	3.36733e+07	0	9332000	0	3.11067e+06	60957000	81195000	0	47384000
A0A078DVT2	CPN60	Chaperonin CPN60	tr|A0A078DVT2|A0A078DVT2_BRANA BnaA03g37240D protein OS=Brassica napus GN=BnaA03g37240D PE=3 SV=1;tr|A0A078DZR2|A0A078DZR2_BRANA BnaC03g43530D protein OS=Brassica napus GN=BnaC03g43530D PE=3 SV=1	58.473	550	8	57789000	117340000	95911000	9.03467e+07	38743000	52319000	73327000	5.47963e+07	56615000	84246000	55995000	6.56187e+07	62095000	33436000	37049000	4.41933e+07	54705000	64823000	40607000	5.33783e+07	34348000	43677000	41458000	3.98277e+07	0	70367000	101460000	5.72757e+07	140720000	108900000	106250000	1.18623e+08
A0A078E5X8	GATB	Glutamyl-tRNA(Gln) amidotransferase subunit B	tr|A0A078E5X8|A0A078E5X8_BRANA Glutamyl-tRNA(Gln) amidotransferase subunit B, chloroplastic/mitochondrial OS=Brassica napus GN=BnaC03g43600D PE=3 SV=1;tr|A0A078DVT9|A0A078DVT9_BRANA Glutamyl-tRNA(Gln) amidotransferase subunit B, chloroplastic/mitochondrial	61.21	552	1	5892800	0	0	1.96427e+06	0	0	0	0	0	0	0	0	6083300	0	0	2.02777e+06	0	0	0	0	0	0	0	0	0	2713300	0	904433	3064900	5394200	23962000	1.0807e+07
A0A078FKS8	LHCB2.1	Chlorophyll a-b binding protein	tr|A0A078FKS8|A0A078FKS8_BRANA Chlorophyll a-b binding protein, chloroplastic OS=Brassica napus GN=BnaC03g44110D PE=3 SV=1;tr|A0A078DW13|A0A078DW13_BRANA Chlorophyll a-b binding protein, chloroplastic OS=Brassica napus GN=BnaA03g37990D PE=3 SV=1	28.637	265	2	1168700	0	0	389567	0	0	0	0	0	0	0	0	18507000	20107000	14390000	17668000	39443000	7519300	6076900	1.76797e+07	27822000	8695800	17767000	1.80949e+07	0	20299000	17666000	12655000	46457000	15359000	65676000	4.24973e+07
A0A078H9K3	ACP4	Acyl carrier protein 4	tr|A0A078H9K3|A0A078H9K3_BRANA Acyl carrier protein OS=Brassica napus GN=BnaA01g14400D PE=3 SV=1;tr|A0A078FCL4|A0A078FCL4_BRANA Acyl carrier protein OS=Brassica napus GN=BnaA03g47100D PE=3 SV=1;tr|A0A078DW59|A0A078DW59_BRANA Acyl carrier protein OS=Brassic	14.582	136	1	63702000	9115200	24812000	3.25431e+07	42888000	53480000	45749000	4.73723e+07	32942000	88123000	32245000	5.11033e+07	14428000	44078000	0	19502000	11030000	68091000	70754000	4.99583e+07	91991000	103450000	44901000	80114000	9460600	62033000	4481300	2.5325e+07	36737000	12865000	33281000	2.76277e+07
A0A141LKF3	At1g08110	Lactoylglutathione lyase (EC 4.4.1.5)	tr|A0A141LKF3|A0A141LKF3_BRANA Lactoylglutathione lyase OS=Brassica napus GN=GLYI PE=2 SV=1;tr|A0A141LKF2|A0A141LKF2_BRANA Lactoylglutathione lyase OS=Brassica napus GN=GLYI PE=2 SV=1;tr|A0A078E3H8|A0A078E3H8_BRANA Lactoylglutathione lyase OS=Brassica napu	20.76	185	2	33254000	0	8158500	1.38042e+07	0	31225000	0	1.04083e+07	18670000	18932000	17675000	1.84257e+07	11463000	0	0	3821000	17802000	34888000	26678000	26456000	0	0	101920000	3.39733e+07	975370	0	0	325123	10871000	30813000	35135000	2.56063e+07
A0A078E141	APX1	L-ascorbate peroxidase 1	tr|A0A078E141|A0A078E141_BRANA BnaC05g05550D protein OS=Brassica napus GN=BnaC05g05550D PE=3 SV=1;tr|A0A078DWB6|A0A078DWB6_BRANA BnaA06g04380D protein OS=Brassica napus GN=BnaA06g04380D PE=3 SV=1;tr|P93657|P93657_BRANA L-ascorbate peroxidase OS=Brassica na	27.611	250	3	157040000	179050000	115900000	1.50663e+08	188750000	78140000	143310000	1.36733e+08	171350000	163490000	109400000	148080000	71867000	70258000	139410000	93845000	114370000	92204000	130810000	1.12461e+08	41546000	25632000	17051000	2.80763e+07	0	59351000	66537000	4.19627e+07	95205000	73456000	123140000	97267000
Q9S9G1			tr|Q9S9G1|Q9S9G1_BRANA Non-specific lipid-transfer protein OS=Brassica napus PE=3 SV=1;sp|Q42615|NLTP2_BRANA Non-specific lipid-transfer protein 2 OS=Brassica napus GN=LTP2 PE=3 SV=1;tr|A0A078FVB1|A0A078FVB1_BRANA Non-specific lipid-transfer protein OS=Bra	9.4308	92	1	53153000	0	17920000	23691000	77170000	62659000	15752000	5.18603e+07	0	714230	0	238077	0	0	0	0	0	0	0	0	0	0	0	0	0	0	0	0	0	620900	0	206967
A0A078DWP6			tr|A0A078DWP6|A0A078DWP6_BRANA BnaC02g15270D protein OS=Brassica napus GN=BnaC02g15270D PE=4 SV=1	66.945	617	5	4664300	4558100	7904700	5.70903e+06	4274700	3713600	2912800	3633700	74707000	82726000	104800000	87411000	2755500	2453700	1636600	2.28193e+06	38094000	10290000	27867000	25417000	319310	3968100	0	1.42914e+06	0	0	2327700	775900	11722000	13826000	10456000	1.20013e+07
A0A078DWY1	RPL11	50S ribosomal protein L11	tr|A0A078DWY1|A0A078DWY1_BRANA BnaA09g24010D protein OS=Brassica napus GN=BnaA09g24010D PE=3 SV=1;tr|A0A078EJE0|A0A078EJE0_BRANA BnaC05g24960D protein OS=Brassica napus GN=BnaC05g24960D PE=3 SV=1;tr|A0A078I750|A0A078I750_BRANA BnaA08g06730D protein (Fragme	22.72	219	4	440760000	0	15979000	1.52246e+08	212730000	799810000	730140000	5.80893e+08	140320000	58176000	77983000	9.21597e+07	139960000	258100000	80803000	159621000	80455000	682050000	336510000	3.66338e+08	378180000	188620000	331660000	2.99487e+08	0	517540000	149290000	2.22277e+08	41758000	75173000	104520000	73817000
A0A078JR60	APS1	APS1 (Fragment)	tr|A0A078JR60|A0A078JR60_BRANA BnaCnng62800D protein OS=Brassica napus GN=BnaCnng62800D PE=4 SV=1;tr|A0A078DX01|A0A078DX01_BRANA BnaA03g36860D protein OS=Brassica napus GN=BnaA03g36860D PE=4 SV=1;tr|Q96349|Q96349_BRANA ATP sulphurylase OS=Brassica napus GN	51.184	462	3	16171000	0	7914000	8.02833e+06	10368000	5361300	0	5243100	0	0	0	0	13384000	27537000	8139800	16353600	11906000	0	15769000	9225000	0	9725500	0	3.24183e+06	0	0	15271000	5.09033e+06	7894900	9378700	8255000	8.50953e+06
A0A078DX11	GDH1	Glycine cleavage system	tr|A0A078DX11|A0A078DX11_BRANA Glycine cleavage system H protein OS=Brassica napus GN=BnaA09g24310D PE=3 SV=1	18.023	166	1	111800000	412820000	351960000	2.92193e+08	293530000	382540000	80224000	252098000	1396400000	1458900000	0	9.51767e+08	0	370980000	99388000	1.56789e+08	675350000	0	543310000	406220000	73244000	34870000	76619000	6.15777e+07	0	26629000	4207200	1.02787e+07	45809000	48924000	98289000	6.43407e+07
A0A078G5F9	RPL13AD	60S ribosomal protein L13a-4	tr|A0A078G5F9|A0A078G5F9_BRANA BnaA09g03130D protein OS=Brassica napus GN=BnaA09g03130D PE=4 SV=1;tr|A0A078ISR7|A0A078ISR7_BRANA BnaA07g05210D protein OS=Brassica napus GN=BnaCnng21840D PE=3 SV=1;tr|A0A078HQ78|A0A078HQ78_BRANA BnaA09g10380D protein OS=Bras	13.417	114	1	1621000	1621600	2610400	1951000	231760	3174400	5654500	3020220	6126200	4321400	5141500	5.19637e+06	3216500	823100	0	1.34653e+06	863100	1202100	0	688400	0	0	0	0	0	3301500	12778000	5.35983e+06	7325300	6213800	6750300	6.76313e+06
A0A078DXA0	AT1G09310	Putative uncharacterized protein	tr|A0A078DXA0|A0A078DXA0_BRANA BnaA06g05360D protein OS=Brassica napus GN=BnaA06g05360D PE=4 SV=1	15.919	141	1	0	582760	789530	457430	0	8424200	4007600	4.14393e+06	1148700	2255800	853210	1.41924e+06	478360	387200	0	288520	0	0	371410	123803	629090	1347000	937260	971117	1329400	1013900	0	781100	1587400	0	1045400	877600
A0A078E3F9	CHLD	Magnesium-chelatase subunit ChlD	tr|A0A078E3F9|A0A078E3F9_BRANA Mg-protoporphyrin IX chelatase OS=Brassica napus GN=BnaC05g06170D PE=3 SV=1;tr|A0A078DXE7|A0A078DXE7_BRANA Mg-protoporphyrin IX chelatase OS=Brassica napus GN=BnaA06g04910D PE=3 SV=1	82.312	754	4	3972900	1878800	1676100	2.50927e+06	2593600	9116400	16590000	9.43333e+06	0	0	0	0	602710	631510	0	411407	0	1384200	2759500	1.38123e+06	2779200	3527900	5020800	3.77597e+06	0	2833800	9249200	4.02767e+06	2285900	2130100	1671400	2.02913e+06
A0A078DXF3	VHA-G1	V-type proton ATPase subunit G1	tr|A0A078DXF3|A0A078DXF3_BRANA V-type proton ATPase subunit G OS=Brassica napus GN=BnaC03g32500D PE=3 SV=1	12.439	112	1	0	0	0	0	0	0	0	0	50751000	0	17222000	2.26577e+07	0	0	0	0	20074000	0	0	6.69133e+06	0	0	26306000	8.76867e+06	0	25236000	0	8412000	0	0	0	0
A0A078DXL8	MPA1	Puromycin-sensitive aminopeptidase	tr|A0A078DXL8|A0A078DXL8_BRANA BnaA06g03960D protein OS=Brassica napus GN=BnaA06g03960D PE=4 SV=1;tr|A0A078J9U5|A0A078J9U5_BRANA BnaA06g39060D protein OS=Brassica napus GN=BnaA06g39060D PE=4 SV=1	105.89	942	3	4430500	8370800	0	4267100	0	4967500	12971000	5979500	14443000	0	0	4.81433e+06	0	0	0	0	13254000	7682400	4188300	8374900	0	0	0	0	131690000	8823100	4998200	4.85038e+07	7520900	7946600	9617600	8361700
A0A078DXN2	DCD	Bifunctional D-cysteine desulfhydrase/1-aminocyclopropane-1-carboxylate deaminase	tr|A0A078DXN2|A0A078DXN2_BRANA BnaA06g03810D protein OS=Brassica napus GN=BnaA06g03810D PE=4 SV=1	41.603	381	3	77307000	115620000	160740000	117889000	30391000	16593000	10424000	19136000	0	76595000	0	2.55317e+07	11989000	36933000	3519300	1.74804e+07	88279000	0	0	2.94263e+07	0	40254000	23048000	2.11007e+07	457850000	0	47441000	1.6843e+08	0	10938000	28314000	13084000
A0A078DY17	PYD1	Dihydropyrimidine dehydrogenase (NADP(+))	tr|A0A078DY17|A0A078DY17_BRANA BnaA05g22440D protein OS=Brassica napus GN=BnaA05g22440D PE=4 SV=1	47.178	431	1	0	0	0	0	0	0	0	0	0	0	0	0	0	0	0	0	0	0	0	0	1456400	0	0	485467	0	0	0	0	0	0	0	0
A0A078DY92	UKL4	Uridine kinase-like protein 4	tr|A0A078DY92|A0A078DY92_BRANA Multifunctional fusion protein OS=Brassica napus GN=BnaC01g18640D PE=3 SV=1	95.964	870	1	271380000	29850000	0	100410000	175650000	196740000	0	124130000	879970000	0	0	2.93323e+08	0	402310000	307100000	236470000	530310000	216040000	136360000	2.94237e+08	336630000	694640000	624850000	552040000	0	0	0	0	57939000	0	80474000	4.61377e+07
A0A078IV01	CCD4	Probable carotenoid cleavage dioxygenase 4 (EC 1.14.99.-)	tr|A0A078IV01|A0A078IV01_BRANA BnaAnng12520D protein OS=Brassica napus GN=BnaAnng12520D PE=4 SV=1;tr|A0A078DYB9|A0A078DYB9_BRANA BnaC04g20610D protein OS=Brassica napus GN=BnaC04g20610D PE=4 SV=1;tr|G3DR86|G3DR86_BRANA Carotenoid cleavage dioxygenase OS=Br	59.315	525	1	0	97910000	0	3.26367e+07	0	26672000	39355000	22009000	0	36319000	56155000	3.08247e+07	0	36278000	50447000	2.89083e+07	0	74693000	0	2.48977e+07	0	0	0	0	0	0	0	0	74489000	57195000	79688000	7.04573e+07
A0A078E6C8	HIS1B	ATP phosphoribosyltransferase 2	tr|A0A078E6C8|A0A078E6C8_BRANA BnaC05g07230D protein OS=Brassica napus GN=BnaC05g07230D PE=3 SV=1;tr|A0A078DYH3|A0A078DYH3_BRANA BnaA06g05690D protein OS=Brassica napus GN=BnaA06g05690D PE=3 SV=1	43.731	403	1	32223000	0	0	10741000	27320000	0	0	9.10667e+06	0	3569700	0	1189900	0	0	0	0	5009900	35773000	25478000	2.2087e+07	23583000	0	19363000	1.43153e+07	0	12959000	0	4.31967e+06	7873100	0	10310000	6.06103e+06
A0A078E310	CSP41-b	Chloroplast stem-loop binding protein of 41 kDa b	tr|A0A078E310|A0A078E310_BRANA BnaC05g06870D protein OS=Brassica napus GN=BnaC05g06870D PE=4 SV=1;tr|A0A078DYK8|A0A078DYK8_BRANA BnaA06g05390D protein OS=Brassica napus GN=BnaA06g05390D PE=4 SV=1	42.427	378	15	1933100000	1544600000	2697400000	2.05837e+09	2751900000	2146300000	2210700000	2.36963e+09	1543700000	887540000	1553400000	1.32821e+09	1905300000	1847600000	2516200000	2089700000	2494100000	2600100000	2948800000	2681000000	2066100000	4300600000	2066600000	2811100000	1716500000	1589500000	1783800000	1696600000	672890000	1069300000	963180000	901790000
A0A078H2Z3	CRT2	Calreticulin-2	tr|A0A078H2Z3|A0A078H2Z3_BRANA BnaCnng06700D protein OS=Brassica napus GN=BnaCnng06700D PE=3 SV=1;tr|A0A078H2M4|A0A078H2M4_BRANA BnaA08g26530D protein OS=Brassica napus GN=BnaA08g26530D PE=3 SV=1;tr|A0A078DYP0|A0A078DYP0_BRANA BnaA06g05290D protein OS=Bras	47.957	422	3	18432000	42112000	108560000	56368000	0	20064000	18922000	1.29953e+07	26032000	24610000	0	1.68807e+07	21498000	11804000	13762000	15688000	19204000	0	13003000	1.07357e+07	13783000	13048000	0	8.94367e+06	36230000	28170000	23428000	29276000	16734000	16516000	18115000	1.71217e+07
A0A078HBM9	SPS1	Solanesyl diphosphate synthase 1 (EC 2.5.1.85)	tr|A0A078HBM9|A0A078HBM9_BRANA BnaC09g37470D protein OS=Brassica napus GN=BnaC09g37470D PE=4 SV=1;tr|A0A078DYU6|A0A078DYU6_BRANA BnaA10g15120D protein OS=Brassica napus GN=BnaA10g15120D PE=4 SV=1;tr|A0A078I5D5|A0A078I5D5_BRANA BnaA02g04800D protein OS=Bras	109.24	966	1	158810000	0	0	5.29367e+07	0	11678000	5449400	5.70913e+06	0	11376000	0	3792000	0	0	0	0	0	1930900	0	643633	21076000	0	0	7.02533e+06	0	0	0	0	15558000	0	5482700	7.01357e+06
A0A078HZT1	DTC	Mitochondrial dicarboxylate/tricarboxylate transporter DTC	tr|A0A078HZT1|A0A078HZT1_BRANA BnaC02g08990D protein OS=Brassica napus GN=BnaC02g08990D PE=3 SV=1;tr|A0A078HDG1|A0A078HDG1_BRANA BnaC09g37940D protein OS=Brassica napus GN=BnaC09g37940D PE=3 SV=1;tr|A0A078DYY4|A0A078DYY4_BRANA BnaA10g15420D protein OS=Bras	32.01	299	6	344470000	637550000	1009800000	663940000	103930000	88873000	170120000	1.20974e+08	0	0	0	0	428020000	45542000	216480000	230014000	37223000	329630000	270670000	2.12508e+08	300780000	206740000	80861000	196127000	210130000	514100000	99559000	2.74596e+08	37372000	342680000	892560000	424204000
A0A078DZ37	At5g12110	Elongation factor 1-beta 1	tr|A0A078DZ37|A0A078DZ37_BRANA BnaA10g15620D protein OS=Brassica napus GN=BnaA10g15620D PE=3 SV=1	24.132	223	1	0	0	0	0	0	0	0	0	0	0	0	0	0	0	0	0	2945500	0	0	981833	0	0	0	0	0	0	0	0	0	0	0	0
A0A078DZ59	CLPT2	ATP-dependent Clp protease ATP-binding subunit CLPT2	tr|A0A078DZ59|A0A078DZ59_BRANA BnaC09g23500D protein OS=Brassica napus GN=BnaC09g23500D PE=4 SV=1;tr|A0A078DHB2|A0A078DHB2_BRANA BnaA09g21130D protein OS=Brassica napus GN=BnaA09g21130D PE=4 SV=1	26.764	244	3	13360000	0	6816400	6.72547e+06	16878000	61317000	38221000	3.88053e+07	18094000	18581000	7786000	1.48203e+07	18153000	28717000	0	1.56233e+07	23850000	28432000	0	1.74273e+07	155810000	92422000	0	82744000	244100000	47734000	7221800	9.96853e+07	33100000	24197000	76029000	44442000
A0A078DZK8	ESP	Epithiospecifier protein AtESP	tr|A0A078DZK8|A0A078DZK8_BRANA BnaC07g17990D protein OS=Brassica napus GN=BnaC07g17990D PE=4 SV=1	37.751	343	1	0	0	0	0	4609400	2689400	0	2.43293e+06	0	0	0	0	0	0	0	0	0	0	2569100	856367	0	0	2017200	672400	0	0	0	0	0	0	1480700	493567
A0A078EB05	ACO3	Aconitate hydratase 3	tr|A0A078EB05|A0A078EB05_BRANA Aconitate hydratase OS=Brassica napus GN=BnaA06g07200D PE=3 SV=1;tr|A0A078E0L0|A0A078E0L0_BRANA Aconitate hydratase OS=Brassica napus GN=BnaA03g38100D PE=3 SV=1;tr|A0A078FY71|A0A078FY71_BRANA Aconitate hydratase OS=Brassica n	108.05	991	6	6849100	2991400	12216000	7.35217e+06	12116000	25252000	25588000	2.09853e+07	5245600	35127000	24507000	2.16265e+07	16041000	21362000	8982800	1.54619e+07	28674000	34517000	23515000	28902000	33228000	24848000	16060000	24712000	19482000	14352000	6281500	1.33718e+07	16415000	36240000	18655000	23770000
A0A078IN04	PAA2	Proteasome subunit alpha type (EC 3.4.25.1)	tr|A0A078IN04|A0A078IN04_BRANA Proteasome subunit alpha type OS=Brassica napus GN=BnaC03g45100D PE=3 SV=1;tr|A0A078FU71|A0A078FU71_BRANA Proteasome subunit alpha type OS=Brassica napus GN=BnaC07g04250D PE=3 SV=1;tr|A0A078E0M5|A0A078E0M5_BRANA Proteasome su	27.172	244	2	0	0	9599100	3199700	31555000	16152000	62775000	3.68273e+07	7705400	6843300	17438000	1.06622e+07	123280000	13510000	0	4.55967e+07	17721000	23711000	65870000	3.57673e+07	98272000	39974000	111090000	83112000	0	31201000	0	1.04003e+07	39705000	30439000	91733000	53959000
A0A078J704	At5g44320	Eukaryotic translation initiation factor 3 subunit 7 (Fragment)	tr|A0A078J704|A0A078J704_BRANA Eukaryotic translation initiation factor 3 subunit D OS=Brassica napus GN=BnaCnng36550D PE=3 SV=1;tr|A0A078IDP6|A0A078IDP6_BRANA Eukaryotic translation initiation factor 3 subunit D OS=Brassica napus GN=BnaAnng09940D PE=3 SV=	65.496	581	2	6494400	0	62210000	2.29015e+07	10565000	19306000	15398000	1.50897e+07	7733100	0	13077000	6936700	8982200	0	21447000	1.01431e+07	6192300	10540000	46545000	2.10924e+07	36122000	35483000	0	2.38683e+07	0	31029000	10724000	1.39177e+07	10901000	22473000	0	1.11247e+07
A0A078E0Y2	P5CS1	Delta-1-pyrroline-5-carboxylate synthase A	tr|A0A078E0Y2|A0A078E0Y2_BRANA Delta-1-pyrroline-5-carboxylate synthase OS=Brassica napus GN=BnaC04g46630D PE=3 SV=1	77.572	717	6	37250700	78041500	38432800	5.12417e+07	11943000	25021000	12326500	16463500	17829000	18129900	15667100	1.72087e+07	5099400	6173000	5188000	5486800	14489400	18990000	15778300	1.64192e+07	6183000	7459000	5899000	6.51367e+06	59102000	48336000	61225000	56221000	6146000	6718000	6895000	6.58633e+06
A0A078E126	At1g66530	Arginine--tRNA ligase	tr|A0A078E126|A0A078E126_BRANA BnaC01g18350D protein OS=Brassica napus GN=BnaC01g18350D PE=3 SV=1;tr|A0A078JVG1|A0A078JVG1_BRANA BnaCnng64110D protein (Fragment) OS=Brassica napus GN=BnaCnng64110D PE=3 SV=1;tr|A0A078HYJ1|A0A078HYJ1_BRANA BnaA03g47930D prot	73.423	657	2	1290500	0	1074400	788300	6716400	0	5170200	3962200	931590	3093300	636180	1553690	14603000	0	8469200	7.69073e+06	0	9872300	5162000	5.01143e+06	3485300	0	12101000	5.19543e+06	0	3970300	0	1.32343e+06	0	7046500	11070000	6.03883e+06
A0A078IQX2	SPP	Insulinase (Peptidase family M16) family protein	tr|A0A078IQX2|A0A078IQX2_BRANA BnaA09g16080D protein OS=Brassica napus GN=BnaA09g16080D PE=4 SV=1;tr|A0A078E1B5|A0A078E1B5_BRANA BnaC09g16840D protein OS=Brassica napus GN=BnaC09g16840D PE=4 SV=1	139.03	1251	1	166820	0	0	55606.7	0	0	383710	127903	0	0	0	0	0	0	0	0	196450	171700	0	122717	0	318720	0	106240	143070000	0	1561900	4.82106e+07	191850	252330	1745300	729827
A0A078E1N0	At2g45300	3-phosphoshikimate 1-carboxyvinyltransferase	tr|A0A078E1N0|A0A078E1N0_BRANA 3-phosphoshikimate 1-carboxyvinyltransferase OS=Brassica napus GN=BnaC03g25260D PE=3 SV=1;tr|A0A078J1K1|A0A078J1K1_BRANA 3-phosphoshikimate 1-carboxyvinyltransferase OS=Brassica napus GN=BnaC04g56880D PE=3 SV=1;sp|P17688|AROA	54.514	509	4	5545600	2809900	4536100	4297200	10311000	13267000	8957300	10845100	6462500	1753100	4947200	4387600	5171500	4423300	5060200	4885000	2970200	1999800	1711900	2227300	6727300	19416000	9167900	11770400	0	11717000	5369300	5.69543e+06	12253000	12583000	7970400	1.09355e+07
A0A078E1U7	F22O6_120	Eukaryotic aspartyl protease family protein	tr|A0A078E1U7|A0A078E1U7_BRANA BnaC04g28120D protein OS=Brassica napus GN=BnaC04g28120D PE=3 SV=1;tr|A0A078GCV8|A0A078GCV8_BRANA BnaA04g05380D protein OS=Brassica napus GN=BnaA04g05380D PE=3 SV=1	51.14	473	3	4084500	3805400	6635300	4.84173e+06	0	12114000	3785600	5.29987e+06	8297600	4271800	12098000	8.22247e+06	4285500	2667000	0	2317500	7751000	3957300	1783200	4.49717e+06	47170000	63560000	8354100	39694700	0	4978900	9549900	4.84293e+06	41876000	27210000	36875000	3.53203e+07
A0A078E1Z3	PGIC	Glucose-6-phosphate isomerase	tr|A0A078E1Z3|A0A078E1Z3_BRANA Glucose-6-phosphate isomerase OS=Brassica napus GN=BnaC09g16980D PE=3 SV=1	40.14	365	1	0	2094500	1446000	1.18017e+06	0	0	977160	325720	0	0	0	0	2746600	0	0	915533	1489000	0	0	496333	0	0	0	0	0	0	1441600	480533	1236300	1157900	951960	1.11539e+06
A0A078E260	At3g17020	Adenine nucleotide alpha hydrolases-like superfamily protein	tr|A0A078E260|A0A078E260_BRANA BnaC05g36410D protein OS=Brassica napus GN=BnaC05g36410D PE=4 SV=1	21.67	195	1	0	0	0	0	46872000	0	0	15624000	0	0	0	0	0	0	0	0	0	0	63051000	21017000	0	0		0	0	0	33751000	1.12503e+07	10478000	35322000	0	1.52667e+07
A0A078I2R1	CARA	Carbamoyl phosphate synthetase A	tr|A0A078I2R1|A0A078I2R1_BRANA BnaA02g14400D protein OS=Brassica napus GN=BnaA02g14400D PE=3 SV=1;tr|A0A078GVA3|A0A078GVA3_BRANA BnaC02g19320D protein OS=Brassica napus GN=BnaC02g19320D PE=3 SV=1;tr|A0A078EM05|A0A078EM05_BRANA BnaC06g28090D protein OS=Bras	46.333	424	1	11131000	0	0	3.71033e+06	21199000	9044700	0	1.00812e+07	0	0	0	0	7396100	0	7842100	5079400	0	0	4364800	1.45493e+06	0	0	0	0	0	0	0	0	0	11571000	0	3857000
A0A078E2B5	At4g29120	Probable 3-hydroxyisobutyrate dehydrogenase-like 1	tr|A0A078E2B5|A0A078E2B5_BRANA BnaA06g04150D protein OS=Brassica napus GN=BnaA06g04150D PE=4 SV=1;tr|A0A078G8E2|A0A078G8E2_BRANA BnaC06g01480D protein OS=Brassica napus GN=BnaC06g01480D PE=4 SV=1	34.697	331	2	0	3146700	6426200	3.19097e+06	2184000	872400	0	1018800	1229000	0	2154400	1127800	2885700	2091900	0	1659200	785220	663510	0	482910	1629400	2667200	3258800	2.51847e+06	0	2677800	2887600	1.85513e+06	0	0	0	0
A0A078E2M7	OHP2	Light-harvesting complex-like protein OHP2	tr|A0A078E2M7|A0A078E2M7_BRANA BnaA09g23380D protein OS=Brassica napus GN=BnaA09g23380D PE=4 SV=1;tr|A0A078I6D5|A0A078I6D5_BRANA BnaA08g06530D protein OS=Brassica napus GN=BnaA08g06530D PE=4 SV=1	18.716	172	2	5925200	1669400	2834600	3476400	0	5073300	6211900	3.76173e+06	6735700	8891400	10591000	8.73937e+06	13161000	6731300	8403400	9431900	2652200	7713300	0	3.45517e+06	29420000	27215000	0	1.88783e+07	73084000	7432800	9108700	2.98752e+07	0	14587000	7104100	7.23037e+06
A0A078FEZ7	At1g70820	Phosphoglucomutase, putative / glucose phosphomutase	tr|A0A078FEZ7|A0A078FEZ7_BRANA BnaC06g31970D protein OS=Brassica napus GN=BnaC06g31970D PE=4 SV=1;tr|A0A078E2Y5|A0A078E2Y5_BRANA BnaA07g28910D protein OS=Brassica napus GN=BnaA07g28910D PE=4 SV=1	67.417	615	2	0	0	0	0	0	0	0	0	0	0	0	0	0	0	0	0	0	0	0	0	0	0	40469000	1.34897e+07	0	0	17086000	5.69533e+06	0	0	0	0
A0A078E320	GSTF8	Glutathione S-transferase F8	tr|A0A078E320|A0A078E320_BRANA BnaC03g26120D protein OS=Brassica napus GN=BnaC03g26120D PE=3 SV=1	24.153	215	2	194050000	0	285240000	1.59763e+08	60227000	0	13511000	2.45793e+07	0	0	0	0	119790000	118830000	93024000	110548000	0	44572000	0	1.48573e+07	0	0	31341000	10447000	0	0	0	0	59440000	180740000	115280000	1.18487e+08
A0A078E361	RPL1	50S ribosomal protein L1	tr|A0A078E361|A0A078E361_BRANA Ribosomal protein OS=Brassica napus GN=BnaC04g20620D PE=3 SV=1;tr|A0A078IUM5|A0A078IUM5_BRANA Ribosomal protein OS=Brassica napus GN=BnaAnng12530D PE=3 SV=1	36.301	335	3	23148000	6897900	21909000	17318300	93396000	77943000	86336000	8.58917e+07	68304000	22216000	59101000	4.98737e+07	33510000	27724000	24631000	2.86217e+07	27560000	44589000	38210000	3.67863e+07	236170000	106950000	91838000	144986000	5123800000	243550000	42720000	1.80336e+09	40787000	23815000	21821000	2.88077e+07
A0A078E379	FAP1	Fatty-acid-binding protein 1	tr|A0A078E379|A0A078E379_BRANA BnaC04g20870D protein OS=Brassica napus GN=BnaC04g20870D PE=4 SV=1	31.088	284	1	927100	0	0	309033	322660	0	507220	276627	0	0	0	0	0	0	0	0	1896900	0	0	632300		0	0	0	0	1805800	0	601933	0	3412700	4222000	2544900
A0A078FVQ1	BGLU44	Beta-glucosidase 44 (AtBGLU44) (EC 3.2.1.21)	tr|A0A078FVQ1|A0A078FVQ1_BRANA BnaA01g27000D protein OS=Brassica napus GN=BnaA01g27000D PE=3 SV=1;tr|A0A078E380|A0A078E380_BRANA BnaC01g34490D protein OS=Brassica napus GN=BnaC01g34490D PE=3 SV=1;tr|A0A078E884|A0A078E884_BRANA BnaC01g34500D protein OS=Bras	59.397	514	3	0	0	0	0	0	0	0	0	0	0	0	0	0	0	0	0	0	0	0	0	9744600	0	11397000	7047200	0	4428600	8400200	4.27627e+06	8047600	9805300	9987400	9280100
A0A078E3D6	At1g73110	p-loop containing nucleoside triphosphate hydrolases superfamily protein	tr|A0A078E3D6|A0A078E3D6_BRANA BnaA07g30610D protein OS=Brassica napus GN=BnaA07g30610D PE=4 SV=1;tr|A0A078J698|A0A078J698_BRANA BnaC06g43890D protein OS=Brassica napus GN=BnaC06g43890D PE=4 SV=1	47.525	422	2	1609300	3553100	5387800	3.51673e+06	281780	2597700	2727400	1868960	4007100	2383800	4277300	3.55607e+06	3699400	2231200	1400800	2443800	3046300	1726600	1538100	2.10367e+06	6377400	3539200	2636200	4.18427e+06	802690	5027900	4053400	3.29466e+06	1630200	1905500	2221900	1919200
A0A078E3I7			tr|A0A078E3I7|A0A078E3I7_BRANA BnaA07g28050D protein OS=Brassica napus GN=BnaA07g28050D PE=4 SV=1	34.107	311	1	0	27832000	33648000	2.04933e+07	6390000	7824500	8782300	7665600	17499000	0	18873000	12124000	0	0	0	0	253840000	149280000	0	1.34373e+08	0	0	0	0	0	0	0	0	0	0	10612000	3.53733e+06
Q96350	CAT3	CAT3 (Fragment)	tr|Q96350|Q96350_BRANA Catalase OS=Brassica napus GN=LSC650 PE=2 SV=2;tr|A0A078E3U3|A0A078E3U3_BRANA BnaA08g21730D protein OS=Brassica napus GN=BnaA08g21730D PE=4 SV=1;tr|A0A078EKU3|A0A078EKU3_BRANA BnaA07g11370D protein OS=Brassica napus GN=BnaA07g11370D	56.806	492	1	58464000	75726000	381590000	1.71927e+08	44733000	48230000	47799000	4.69207e+07	0	0	0	0	76306000	70589000	0	48965000	0	49735000	54555000	3.47633e+07	0	0	0	0	0	0	34290000	11430000	27252000	53654000	0	2.69687e+07
A0A078E446	PSRP2	30S ribosomal protein 2	tr|A0A078E446|A0A078E446_BRANA BnaC04g28390D protein OS=Brassica napus GN=BnaC04g28390D PE=4 SV=1	28.561	262	1	2736900	3843700	4031700	3.53743e+06	10380000	12236000	10708000	11108000	4853500	4611400	6121000	5195300	3891700	3566300	1961300	3.13977e+06	6406500	5875500	3097400	5.12647e+06	7477000	9793400	6690200	7.98687e+06	1738400	5764700	14506000	7.33637e+06	7324000	8143900	9305400	8.25777e+06
A0A078GJ98	NDPK3	Nucleoside diphosphate kinase III (NDK III) (NDP kinase III) (NDPK III) (EC 2.7.4.6)	tr|A0A078GJ98|A0A078GJ98_BRANA Nucleoside diphosphate kinase OS=Brassica napus GN=BnaA02g21890D PE=3 SV=1;tr|A0A078E468|A0A078E468_BRANA Nucleoside diphosphate kinase OS=Brassica napus GN=BnaC02g28980D PE=3 SV=1	25.607	235	1	117540000	0	24285000	47275000	750490000	12377000	143220000	302029000	49332000	20380000	55980000	4.18973e+07	18249000	0	38545000	1.89313e+07	24343000	620390000	1430700000	691811000	0	103130000	189080000	9.74033e+07	0	188260000	384230000	190830000	184930000	1081600000	0	4.22177e+08
A0A078E472			tr|A0A078E472|A0A078E472_BRANA BnaA07g28040D protein OS=Brassica napus GN=BnaA07g28040D PE=4 SV=1	34.029	311	2	0	0	0	0	0	0	0	0	0	0	0	0	0	0	16986000	5662000	0	0	56862000	18954000	0	0	0	0	0	0	0	0	0	25765000	0	8.58833e+06
A0A078IVS9	At1g66430	Probable fructokinase-6(EC 2.7.1.4)	tr|A0A078IVS9|A0A078IVS9_BRANA BnaC06g43510D protein OS=Brassica napus GN=BnaC06g43510D PE=3 SV=1;tr|A0A078E4C1|A0A078E4C1_BRANA BnaA07g25850D protein OS=Brassica napus GN=BnaA07g25850D PE=3 SV=1	41.693	388	5	49286000	20685000	11990000	2.73203e+07	0	116030000	141520000	85850000	32624000	29865000	30910000	31133000	38305000	40921000	62213000	4.71463e+07	63360000	22499000	94733000	6.01973e+07	198530000	6299900	217510000	1.4078e+08	599520000	0	50819000	2.1678e+08	74787000	51927000	91646000	7.27867e+07
A0A078J3S8	TUBB4	Tubulin beta-4 chain (Beta-4-tubulin)	tr|A0A078J3S8|A0A078J3S8_BRANA Tubulin beta chain OS=Brassica napus GN=BnaCnng36540D PE=3 SV=1;tr|A0A078FLK6|A0A078FLK6_BRANA Tubulin beta chain OS=Brassica napus GN=BnaA09g17090D PE=3 SV=1;tr|A0A078E4J4|A0A078E4J4_BRANA Tubulin beta chain OS=Brassica napu	49.825	445	1	0	6020900	4668700	3563200	21235000	21253000	45516000	2.93347e+07	0	0	0	0	25016000	0	0	8.33867e+06	0	0	0	0	0	12171000	0	4057000	0	0	33668000	1.12227e+07	23546000	0	0	7.84867e+06
Q9M4F0	CLPP3	ATP-dependent Clp protease proteolytic subunit 3(EC 3.4.21.92)	tr|Q9M4F0|Q9M4F0_BRANA ATP-dependent Clp protease proteolytic subunit OS=Brassica napus var. napus GN=ClpP PE=3 SV=1;tr|Q93YL4|Q93YL4_BRANA ATP-dependent Clp protease proteolytic subunit (Fragment) OS=Brassica napus GN=clpP PE=2 SV=1;tr|A0A078E4U3|A0A078E4	34.359	313	2	69163000	0	0	2.30543e+07	0	71439000	0	23813000	90969000	0	0	30323000	0	60448000	0	2.01493e+07	90745000	0	0	3.02483e+07	77010000	0	27429000	34813000	671090000	27911000	0	2.33e+08	35539000	45966000	0	2.71683e+07
A0A078FUP5	At4g12580		tr|A0A078FUP5|A0A078FUP5_BRANA BnaA09g20840D protein OS=Brassica napus GN=BnaA09g20840D PE=4 SV=1;tr|A0A078E548|A0A078E548_BRANA BnaC09g23130D protein OS=Brassica napus GN=BnaC09g23130D PE=4 SV=1	11.647	105	3	0	0	0	0	0	0	0	0	1452000	0	1630400	1.02747e+06	0	0	0	0	0	2194400	0	731467	0	0	0	0	0	0	0	0	6665200	27283000	17147000	1.70317e+07
A0A078IIT4	PYD1	Dihydropyrimidine dehydrogenase (NADP(+))	tr|A0A078IIT4|A0A078IIT4_BRANA BnaC01g34640D protein OS=Brassica napus GN=BnaC01g34640D PE=4 SV=1;tr|A0A078I7H7|A0A078I7H7_BRANA BnaA01g27800D protein OS=Brassica napus GN=BnaA01g27800D PE=4 SV=1;tr|A0A078E5G2|A0A078E5G2_BRANA BnaC05g35700D protein OS=Bras	46.729	424	1	0	0	0	0	671330	0	382010	351113	722600	0	914580	545727	1419800	1679700	457580	1.18569e+06	1260600	1603400	0	954667	0	1604900	2059000	1221300	3573000	0	0	1191000	4349800	3377800	7002500	4.91003e+06
A0A078E5K3	PATL1	Patellin-1	tr|A0A078E5K3|A0A078E5K3_BRANA BnaA07g29880D protein OS=Brassica napus GN=BnaA07g29880D PE=4 SV=1;tr|A0A078JZQ2|A0A078JZQ2_BRANA BnaCnng74720D protein OS=Brassica napus GN=BnaCnng74720D PE=4 SV=1;tr|A0A078BWX0|A0A078BWX0_BRANA BnaA07g23190D protein OS=Bras	62.107	556	1	0	0	0	0	0	0	0	0	0	0	0	0	0	0	0	0	0	0	0	0	0	0	0	0	0	0	0	0	0	0	0	0
A0A078GB81	UAH	Ureidoglycolate hydrolase (EC 3.5.1.116)	tr|A0A078GB81|A0A078GB81_BRANA BnaA06g36640D protein OS=Brassica napus GN=BnaA06g36640D PE=4 SV=1;tr|A0A078E5L0|A0A078E5L0_BRANA BnaC07g17220D protein OS=Brassica napus GN=BnaC07g17220D PE=4 SV=1	52.468	483	1	189400	0	307700	165743	384690	0	0	128230	0	201720	0	67240	0	468210	190280	219497	0	403050	0	134350	1241900	729860	0	657253	0	0	0	0	10992000	0	7768800	6253600
A0A078J8T5	LPA3	Protein LOW PSII ACCUMULATION 3	tr|A0A078J8T5|A0A078J8T5_BRANA BnaC06g43860D protein OS=Brassica napus GN=BnaC06g43860D PE=4 SV=1;tr|A0A078E5U4|A0A078E5U4_BRANA BnaA07g30580D protein OS=Brassica napus GN=BnaA07g30580D PE=4 SV=1	39.966	356	3	31432000	56724000	59643000	4.92663e+07	28120000	0	18404000	15508000	0	0	40326000	13442000	195370000	98337000	0	9.79023e+07	0	0	0	0	0	0	0	0	0	0	9672000	3224000	35547000	12735000	0	16094000
A0A078E618	HPR	Glycerate dehydrogenase HPR	tr|A0A078E618|A0A078E618_BRANA BnaA07g26770D protein OS=Brassica napus GN=BnaA07g26770D PE=3 SV=1	50.195	458	3	43731000	7123700	13985000	2.16132e+07	122530000	330400000	653300000	3.68743e+08	7848100	10169000	14935000	1.0984e+07	11657000	275760000	284180000	1.90532e+08	84887000	30379000	241040000	1.18769e+08	603600000	1375000000	522940000	8.33847e+08	5686900000	112330000	875810000	2.22501e+09	280920000	251540000	101010000	2.11157e+08
A0A078G591	TIF3H1	Eukaryotic translation initiation factor 3 subunit H	tr|A0A078G591|A0A078G591_BRANA Eukaryotic translation initiation factor 3 subunit H OS=Brassica napus GN=BnaC08g14570D PE=3 SV=1;tr|A0A078HD08|A0A078HD08_BRANA Eukaryotic translation initiation factor 3 subunit H OS=Brassica napus GN=BnaC08g42320D PE=3 SV=	36.231	319	2	0	9909200	10232000	6.71373e+06	0	27456000	63435000	30297000	3232200	0	0	1077400	8374000	8515200	14047000	1.03121e+07	0	32027000	0	1.06757e+07	167000000	93443000	83512000	1.14652e+08	371060000	35908000	34298000	1.47089e+08	50487000	109300000	34203000	6.46633e+07
A0A078E7Z7	HSP17.6	17.6 kDa class II heat shock protein	tr|A0A078E7Z7|A0A078E7Z7_BRANA BnaC09g44630D protein OS=Brassica napus GN=BnaC09g44630D PE=3 SV=1	17.352	154	1	15595000	0	7324800	7.63993e+06	0	0	0	0	0	965240	0	321747	0	0	0	0	0	0	0	0	0	0	0	0	0	1652400	0	550800	0	0	0	0
A0A078H2R9	BSL2	Serine/threonine-protein phosphatase (EC 3.1.3.16)	tr|A0A078H2R9|A0A078H2R9_BRANA Serine/threonine-protein phosphatase OS=Brassica napus GN=BnaA08g26980D PE=3 SV=1;tr|A0A078F3K9|A0A078F3K9_BRANA Serine/threonine-protein phosphatase OS=Brassica napus GN=BnaA09g48900D PE=3 SV=1;tr|A0A078E8F2|A0A078E8F2_BRANA	105.23	990	1	145770	0	272760	139510	0	81509	188140	89883	0	0	0	0	368110	339550	287790	331817	0	226640	0	75546.7	0	0	0	0	0	0	223120	74373.3	804550	735050	142970	560857
A0A078H7X0	At4g22380	Ribosomal protein L7Ae-like	tr|A0A078H7X0|A0A078H7X0_BRANA BnaA01g12190D protein OS=Brassica napus GN=BnaC02g26240D PE=4 SV=1;tr|A0A078E8G5|A0A078E8G5_BRANA BnaA02g21230D protein OS=Brassica napus GN=BnaA02g21230D PE=4 SV=1	13.886	128	2	1876700	2962600	2743000	2.52743e+06	1798600	2056800	1616500	1.82397e+06	7206600	3711900	8491600	6.47003e+06	2284900	1565300	0	1283400	7487300	3003700	2890500	4460500	1357800	1085100	1488200	1.31037e+06	0	2144300	1842200	1.32883e+06	3887700	4304100	4398200	4.19667e+06
Q9FT10	RPT2A	26S proteasome regulatory subunit 4 homolog A	tr|Q9FT10|Q9FT10_BRANA 26S proteasome subunit 4-like protein OS=Brassica napus GN=homologue of AT4g29040 PE=3 SV=1;tr|A0A078H9W4|A0A078H9W4_BRANA BnaA01g07860D protein OS=Brassica napus GN=BnaA01g07860D PE=3 SV=1;tr|A0A078F118|A0A078F118_BRANA BnaC01g09460	49.42	443	3	32512000	0	4372300	1.22948e+07	15309000	28002000	3878900	1.573e+07	3172100	4987500	4757700	4.30577e+06	19888000	7611900	8464800	1.19882e+07	37347000	2999800	0	1.34489e+07	19795000	31922000	9160100	2.02924e+07	0	0	38663000	1.28877e+07	49399000	9002600	0	19467200
A0A078E8Z4	HEME1	Uroporphyrinogen decarboxylase 1	tr|A0A078E8Z4|A0A078E8Z4_BRANA Uroporphyrinogen decarboxylase OS=Brassica napus GN=BnaC05g38600D PE=3 SV=1;tr|A0A078E9B7|A0A078E9B7_BRANA Uroporphyrinogen decarboxylase OS=Brassica napus GN=BnaA05g24620D PE=3 SV=1	46.183	420	1	3431800	0	0	1.14393e+06	3833600	1934700	2020600	2596300	0	0	0	0	0	0	1515500	505167	0	1572100	0	524033	0		0	0	304860000	0	0	101620000	0	0	2470100	823367
A0A078GZX0	MFP1	MAR-binding filament-like protein 1	tr|A0A078GZX0|A0A078GZX0_BRANA BnaC05g37340D protein OS=Brassica napus GN=BnaC05g37340D PE=4 SV=1;tr|A0A078E925|A0A078E925_BRANA BnaA05g23630D protein OS=Brassica napus GN=BnaA05g23630D PE=4 SV=1	81.01	720	1	0	0	0	0	0	0	0	0	22406000	24399000	0	1.56017e+07	22165000	24299000	0	15488000	0	0	0	0	0	5141700	0	1713900	0	0	6513000	2171000	5715600	0	0	1905200
A0A078J784	ASP1	Aspartate aminotransferase(EC 2.6.1.1)	tr|A0A078J784|A0A078J784_BRANA Aspartate aminotransferase OS=Brassica napus GN=BnaA04g28670D PE=4 SV=1;tr|A0A078E984|A0A078E984_BRANA Aspartate aminotransferase OS=Brassica napus GN=BnaC04g41630D PE=4 SV=1;tr|A0A078IS58|A0A078IS58_BRANA Aspartate aminotran	47.642	427	2	4789400	8953200	8246700	7.32977e+06	3271200	3698400	3486400	3.48533e+06	23081000	0	0	7.69367e+06	0	0	0	0	8285900	0	3793300	4026400	5487100	0	5516500	3.66787e+06	0	0	11328000	3776000	13346000	15265000	11838000	13483000
A0A078EV11	SKU5	Monocopper oxidase-like protein SKU5	tr|A0A078EV11|A0A078EV11_BRANA BnaC02g28190D protein OS=Brassica napus GN=BnaC02g28190D PE=4 SV=1;tr|A0A078E9C4|A0A078E9C4_BRANA BnaA02g21300D protein OS=Brassica napus GN=BnaA02g21300D PE=4 SV=1;tr|A0A078DNN8|A0A078DNN8_BRANA BnaA03g25100D protein OS=Bras	65.612	586	5	26805000	38362000	25217000	30128000	26931000	28305000	0	18412000	73591000	0	134780000	69457000	43900000	36080000	6420500	2.88002e+07	0	0	13017000	4339000	10659000	96463000	0	3.57073e+07	1003400000	23880000	14581000	347287000	10693000	44368000	0	1.83537e+07
A0A078E9H8	CYP37	Peptidyl-prolyl cis-trans isomerase CYP37	tr|A0A078E9H8|A0A078E9H8_BRANA BnaA05g24020D protein OS=Brassica napus GN=BnaA05g24020D PE=4 SV=1;tr|A0A078ECT0|A0A078ECT0_BRANA BnaC05g38110D protein OS=Brassica napus GN=BnaC05g38110D PE=4 SV=1	49.814	459	2	0	0	0	0	0	0	0	0	0	0	0	0	0	0	0	0	0	0	0	0	0	0	0	0	0	62369000	35407000	32592000	0	0	0	0
A0A078E9I5	HSP17.8	17.8 kDa class I heat shock protein	tr|A0A078E9I5|A0A078E9I5_BRANA BnaC04g40580D protein OS=Brassica napus GN=BnaC04g40580D PE=3 SV=1	17.463	153	2	28506000	4730300	21800000	1.83454e+07	6940500	51640000	23002000	2.71942e+07	0	0	0	0	1824000	3450000	3882400	3.05213e+06	7930600	5078500	1646600	4.88523e+06	0	0	0	0	315610000	0	25238000	113616000	4215600	5070900	6557900	5.28147e+06
A0A078E9N5	FTSH5	ATP-dependent zinc metalloprotease FTSH 5	tr|A0A078E9N5|A0A078E9N5_BRANA BnaA07g26630D protein OS=Brassica napus GN=BnaA07g26630D PE=3 SV=1;tr|A0A078EIE3|A0A078EIE3_BRANA BnaC06g28800D protein OS=Brassica napus GN=BnaC06g28800D PE=3 SV=1	72.028	675	14	265900000	127430000	164510000	1.85947e+08	834660000	519310000	87106000	4.80359e+08	122680000	359650000	88882000	190404000	1385500000	587490000	909000000	9.60663e+08	386440000	998460000	230240000	538380000	201010000	387890000	909880000	4.99593e+08	1398600000	189300000	955740000	847880000	711630000	1147300000	256370000	705100000
A0A078E9V2	At4g28005	NADH dehydrogenase ubiquinone 1 alpha subcomplex subunit	tr|A0A078E9V2|A0A078E9V2_BRANA BnaC02g14930D protein OS=Brassica napus GN=BnaC02g14930D PE=4 SV=1;tr|A0A078GPB9|A0A078GPB9_BRANA BnaA02g10640D protein OS=Brassica napus GN=BnaA02g10640D PE=4 SV=1;tr|A0A078IZS6|A0A078IZS6_BRANA BnaA03g12510D protein OS=Bras	18.435	163	1	0	0	0	0	1474800	0	1467300	980700	0	0	0	0	0	0	3330800	1.11027e+06	0	3409700	0	1.13657e+06	0		0	0	0	0	5622600	1874200	8660200	5377400	5086300	6.37463e+06
A0A078EB73	PME3	Pectinesterase/pectinesterase inhibitor 3	tr|A0A078EB73|A0A078EB73_BRANA Pectinesterase OS=Brassica napus GN=BnaC05g39340D PE=4 SV=1;tr|A0A078EA18|A0A078EA18_BRANA Pectinesterase OS=Brassica napus GN=BnaA05g25150D PE=4 SV=1	61.744	572	3	7918700	9108700	7320600	8116000	7228400	4795400	3690400	5.23807e+06	56803000	44000000	28137000	42980000	0	0	0	0	5651600	5248400	4604400	5.16813e+06	9434400	8911500	3822600	7389500	1281600	3532800	6755600	3.85667e+06	16458000	15171000	27929000	1.98527e+07
A0A078EA26	GLO1	(S)-2-hydroxy-acid oxidase GLO1	tr|A0A078EA26|A0A078EA26_BRANA BnaA05g25050D protein OS=Brassica napus GN=BnaA05g25050D PE=3 SV=1	40.733	370	1	0	0	0	0	0	0	0	0	0	0	0	0	0	0	0	0	0	0	0	0	0	0	0	0	0	2179000	0	726333	0	0	0	0
A0A078GPL5	CLPR2	ATP-dependent Clp protease proteolytic subunit-related protein 2	tr|A0A078GPL5|A0A078GPL5_BRANA ATP-dependent Clp protease proteolytic subunit OS=Brassica napus GN=BnaA09g47140D PE=3 SV=1;tr|A0A078GZS0|A0A078GZS0_BRANA ATP-dependent Clp protease proteolytic subunit OS=Brassica napus GN=BnaC05g09420D PE=3 SV=1;tr|A0A078E	31.191	278	1	878200	1123200	0	667133	1839200	3812800	2204800	2.61893e+06	0	0	0	0	0	0	0	0	0	0	1019100	339700	0	0	0	0	0	1098300	0	366100	0	0	0	0
A0A078EA86	At1g12230	Aldolase superfamily protein	tr|A0A078EA86|A0A078EA86_BRANA BnaA06g08320D protein OS=Brassica napus GN=BnaA06g08320D PE=4 SV=1;tr|A0A078GUB1|A0A078GUB1_BRANA BnaC05g09650D protein OS=Brassica napus GN=BnaC05g09650D PE=4 SV=1	43.792	406	1	0	0	677760	225920	0	0	2656600	885533	644950	0	0	214983	1704300	1317100	762700	1.26137e+06	0	432820	0	144273	0	6510800	0	2.17027e+06	0	0	2683300	894433	1724900	3936500	2194700	2618700
A0A078GUF2	RCA	Rubisco activase	tr|A0A078GUF2|A0A078GUF2_BRANA BnaC05g37470D protein OS=Brassica napus GN=BnaC05g37470D PE=4 SV=1;tr|A0A078EAC8|A0A078EAC8_BRANA BnaA05g23700D protein OS=Brassica napus GN=BnaA05g23700D PE=4 SV=1;tr|A0A078J081|A0A078J081_BRANA BnaA03g57530D protein OS=Bras	29.605	267	2	13899000	0	25900000	1.32663e+07	14149000	3401100	9172600	8.90757e+06	8437100	10745000	6034500	8.40553e+06	19031000	44382000	0	2.11377e+07	11120000	0	0	3.70667e+06	33186000	15129000	39621000	29312000	314260000	6874300	38269000	119801100	5771000	17169000	22009000	14983000
A0A078JLI7	PSAH2	Photosystem I reaction center subunit VI-2(PSI-H1)	tr|A0A078JLI7|A0A078JLI7_BRANA BnaC06g41070D protein OS=Brassica napus GN=BnaC06g41070D PE=4 SV=1;tr|A0A078IVI3|A0A078IVI3_BRANA BnaA06g01680D protein OS=Brassica napus GN=BnaA06g01680D PE=4 SV=1;tr|A0A078GY42|A0A078GY42_BRANA BnaC05g37250D protein OS=Bras	15.319	145	3	0	6616400	674530000	227048800	207510000	386620000	372860000	322330000	20531000	121490000	597140000	246387000	554630000	455530000	360920000	4.57027e+08	667930000	215570000	453850000	4.45783e+08	711200000	357940000	268530000	445890000	22396000	162470000	466910000	2.17259e+08	0	350340000	260230000	2.03523e+08
A0A078GM45	At1g29880	Glycine--tRNA ligase1 (EC 6.1.1.14)	tr|A0A078GM45|A0A078GM45_BRANA BnaA09g26600D protein OS=Brassica napus GN=BnaA09g26600D PE=4 SV=1;tr|A0A078ECN8|A0A078ECN8_BRANA BnaC05g22820D protein OS=Brassica napus GN=BnaC05g22820D PE=4 SV=1;tr|A0A078HXF5|A0A078HXF5_BRANA BnaA07g07590D protein OS=Bras	77.419	690	4	142770000	601850000	297240000	3.47287e+08	65709000	0	20861000	2.88567e+07	143890000	0	0	4.79633e+07	28177000	43144000	881470000	317597000	24505000	53491000	0	2.59987e+07	35777000	0	34361000	2.33793e+07	2628600000	34167000	99261000	920676000	28826000	29180000	0	1.93353e+07
A0A078EAR1	VHA-C	V-type proton ATPase subunit C	tr|A0A078EAR1|A0A078EAR1_BRANA V-type proton ATPase subunit C OS=Brassica napus GN=BnaA06g07880D PE=3 SV=1;tr|A0A078G265|A0A078G265_BRANA V-type proton ATPase subunit C OS=Brassica napus GN=BnaC05g09300D PE=3 SV=1;tr|A0A078FSI1|A0A078FSI1_BRANA V-type prot	42.633	375	1	2489900	1049600	2402500	1.98067e+06	0	0	2519500	839833	1111600	0	606810	572803	0	0	0	0	0	1853000	1334800	1062600	0	10360000	0	3.45333e+06	8391400	1914700	2837300	4.38113e+06	2773300	16774000	10021000	9856100
A0A078EB95	PETE	Plastocyanin minor isoform	tr|A0A078EB95|A0A078EB95_BRANA Plastocyanin OS=Brassica napus GN=BnaA08g21860D PE=3 SV=1;tr|A0A078JL06|A0A078JL06_BRANA Plastocyanin OS=Brassica napus GN=BnaA06g38550D PE=3 SV=1;tr|A0A078J283|A0A078J283_BRANA Plastocyanin OS=Brassica napus GN=BnaCnng32150D	16.897	165	1	395570000	0	168710000	1.88093e+08	1112900000	1160400000	629280000	9.67527e+08	225040000	241070000	207670000	2.24593e+08	1305900000	543610000	259030000	7.02847e+08	149610000	859380000	0	336330000	521360000	1604700000	555770000	8.93943e+08	3795300	610480000	1024400000	546225100	234050000	202030000	121710000	185930000
A0A078GMN6	CML13	Probable calcium-binding protein	tr|A0A078GMN6|A0A078GMN6_BRANA BnaA09g47210D protein OS=Brassica napus GN=BnaA09g47210D PE=4 SV=1;tr|A0A078FSA3|A0A078FSA3_BRANA BnaC08g41320D protein OS=Brassica napus GN=BnaC08g41320D PE=4 SV=1;tr|A0A078EBD9|A0A078EBD9_BRANA BnaA06g08250D protein OS=Bras	16.458	148	1	4141000	0	0	1.38033e+06	9946000	15231000	28340000	17839000	7910400	3258200	4304600	5.15773e+06	1649700	9046900	0	3.56553e+06	2223400	0	5779400	2667600	0	5398200	10695000	5364400	0	8643600	6725500	5.12303e+06	0	0	0	0
A0A078EBE4	TL20.3	Thylakoid lumenal protein TL20.3	tr|A0A078EBE4|A0A078EBE4_BRANA BnaA06g08300D protein OS=Brassica napus GN=BnaA06g08300D PE=4 SV=1;tr|A0A078GJ92|A0A078GJ92_BRANA BnaA09g47270D protein OS=Brassica napus GN=BnaA09g47270D PE=4 SV=1;tr|A0A078FS96|A0A078FS96_BRANA BnaC08g41370D protein OS=Bras	11.56	110	2	92126000	19217000	116540000	75961000	79157000	65872000	194450000	1.1316e+08	12734000	48190000	29380000	3.01013e+07	202360000	70766000	54333000	109153000	186910000	42956000	72900000	100922000	125200000	247430000	145010000	1.72547e+08	0	81607000	58565000	46724000	176450000	54927000	56324000	9.59003e+07
A0A078EBJ7	DJ1A	Protein DJ-1 homolog A	tr|A0A078EBJ7|A0A078EBJ7_BRANA BnaC05g38540D protein OS=Brassica napus GN=BnaC05g38540D PE=4 SV=1;tr|A0A078E6A3|A0A078E6A3_BRANA BnaA05g24540D protein OS=Brassica napus GN=BnaA05g24540D PE=4 SV=1	41.742	392	2	34418000	38245000	0	24221000	0	1331600	0	443867	89950000	0	0	2.99833e+07	0	14864000	6547200	7.13707e+06	100170000	0	61410000	53860000	0	21685000	0	7.22833e+06	0	0	0	0	22865000	0	90710000	3.78583e+07
A0A078EBS9	HINT 2	HISTIDINE TRIAD NUCLEOTIDE-BINDING 2	tr|A0A078EBS9|A0A078EBS9_BRANA BnaC07g08540D protein OS=Brassica napus GN=BnaC07g08540D PE=4 SV=1	19.794	183	1	0	277240	472250	249830	22575000	312410	0	7.62914e+06	1537400	1243900	1776500	1.51927e+06	1984300	2215500	685320	1.62837e+06	1056100	424810	303640	594850	522350	0	934640	485663	0	8178700	6294000	4.82423e+06	4616300	2795700	8031900	5.14797e+06
A0A078EBY6	At3g58610	Ketol-acid reductoisomerase	tr|A0A078EBY6|A0A078EBY6_BRANA Ketol-acid reductoisomerase OS=Brassica napus GN=BnaC06g16700D PE=3 SV=1;tr|A0A078EET4|A0A078EET4_BRANA Ketol-acid reductoisomerase OS=Brassica napus GN=BnaC04g23500D PE=3 SV=1;tr|A0A078DIF0|A0A078DIF0_BRANA Ketol-acid reduct	63.675	589	3	11417000	11594000	13282000	1.20977e+07	27876000	3840700	23872000	1.85296e+07	11119000	0	11402000	7507000	3495400	3250300	2754200	3.16663e+06	12001000	12722000	7470700	1.07312e+07	15426000	13962000	5894000	1.17607e+07	0	278640000	6187800	94942600	5202500	3811500	3418300	4144100
A0A078FU45	FBA1	Fructose-bisphosphate aldolase (EC 4.1.2.13)	tr|A0A078FU45|A0A078FU45_BRANA Fructose-bisphosphate aldolase OS=Brassica napus GN=BnaA04g12130D PE=3 SV=1;tr|A0A078EC07|A0A078EC07_BRANA Fructose-bisphosphate aldolase OS=Brassica napus GN=BnaC04g33570D PE=3 SV=1	42.197	390	2	386930000	81960000	531220000	333370000	232170000	0	167950000	1.33373e+08	0	0	257170000	8.57233e+07	192530000	192240000	178810000	187860000	0	60565000	153010000	7.11917e+07	522370000	402510000	546600000	4.90493e+08	203910000	371400000	69292000	2.14867e+08	45300000	38463000	110290000	6.46843e+07
A0A078ECP5	CARB	Carbamoyl-phosphate synthase large chain	tr|A0A078ECP5|A0A078ECP5_BRANA BnaC05g22870D protein OS=Brassica napus GN=BnaC05g22870D PE=3 SV=1;tr|A0A078GM81|A0A078GM81_BRANA BnaA09g26580D protein OS=Brassica napus GN=BnaA09g26580D PE=3 SV=1	126.41	1153	4	23461000	10137000	12119000	15239000	62627000	8247100	31841000	3.42384e+07	11630000	10469000	15248000	12449000	0	0	0	0	54374000	9716800	12408000	25499600	11621000	8803100	13000000	1.11414e+07	0	43787000	77187000	4.03247e+07	17745000	0	61898000	2.65477e+07
A0A078ECS2	At3g15360	Thioredoxin M4	tr|A0A078ECS2|A0A078ECS2_BRANA BnaC05g38210D protein OS=Brassica napus GN=BnaC05g38210D PE=4 SV=1	21.073	192	1	5724300	6157200	7918900	6.60013e+06	0	2559900	6329100	2963000	212610	0	0	70870	113570	0	0	37856.7	1659500	7241300	168300	3.02303e+06	0	0	0	0	0	0	0	0	2787500	2844500	2471100	2.70103e+06
A0A078EDL6	LIR1	Light-regulated protein 1	tr|A0A078EDL6|A0A078EDL6_BRANA BnaC09g01160D protein OS=Brassica napus GN=BnaC09g01160D PE=4 SV=1;tr|A0A078JBN4|A0A078JBN4_BRANA BnaA09g52250D protein OS=Brassica napus GN=BnaA09g52250D PE=4 SV=1	15.033	138	2	0	0	0	0	0	15203000	22469000	1.25573e+07	0	0	0	0	15297000	0	0	5099000	0	0	0	0	0	12396000	31063000	1.44863e+07	43180000	11999000	0	18393000	0	0	0	0
A0A078JRK8	PSAE1	Photosystem I reaction center subunit IV A	tr|A0A078JRK8|A0A078JRK8_BRANA BnaA08g30780D protein OS=Brassica napus GN=BnaA08g30780D PE=4 SV=1;tr|A0A078EDN9|A0A078EDN9_BRANA BnaC08g13230D protein OS=Brassica napus GN=BnaC08g13230D PE=4 SV=1	14.967	143	3	3183500	7101700	13826000	8.03707e+06	2700900	3112000	3099700	2.97087e+06	9294500	8526300	10464000	9.42827e+06	5782800	2962500	4188600	4311300	15082000	7075300	14898000	1.23518e+07	9455800	6980400	8289700	8.24197e+06	0	35511000	5087500	1.35328e+07	5479900	5210900	1392600	4027800
A0A078EDZ2	KIN12D	Kinesin-like protein KIN-12D	tr|A0A078EDZ2|A0A078EDZ2_BRANA BnaC05g33920D protein OS=Brassica napus GN=BnaC05g33920D PE=3 SV=1	307.59	2705	1	0	0	0	0	0	0	0	0	0	0	0	0	0	0	0	0	0	0	0	0	0	0	0	0	0	0	0	0	0	0	0	0
A0A078EE19	At3g15020	GOX2	tr|A0A078EE19|A0A078EE19_BRANA BnaA05g25060D protein OS=Brassica napus GN=BnaA05g25060D PE=3 SV=1	42.223	381	1	0	0	0	0	0	0	0	0	1865900	0	0	621967	0	0	0	0	0	0	0	0	0	0	0	0	0	0	0	0	0	0	0	0
A0A078EE94	PDIL1-1	Protein disulfide isomerase-like 1-1	tr|A0A078EE94|A0A078EE94_BRANA Protein disulfide-isomerase OS=Brassica napus GN=BnaC07g14260D PE=3 SV=1;tr|A0A078EKP6|A0A078EKP6_BRANA Protein disulfide-isomerase OS=Brassica napus GN=BnaA07g10870D PE=3 SV=1	56.256	504	2	0	0	5910100	1.97003e+06	4700800	5107600	3304500	4.37097e+06	0	0	0	0	0	3319300	3497000	2272100	0	0	2724700	908233	4788200	2392400	4425800	3868800	0	0	0	0	3003600	2811100	3081500	2965400
A0A078EEA8	CCD4	Probable carotenoid cleavage dioxygenase 4	tr|A0A078EEA8|A0A078EEA8_BRANA BnaC01g11550D protein OS=Brassica napus GN=BnaC01g11550D PE=4 SV=1;tr|A0A078CUR6|A0A078CUR6_BRANA BnaA01g09900D protein OS=Brassica napus GN=BnaA01g09900D PE=4 SV=1	65.433	593	7	142320000	79238000	115330000	112296000	5847300	7448600	17930000	1.04086e+07	194830000	366180000	59336000	206782000	572890000	462960000	312510000	4.49453e+08	26220000	11273000	0	1.24977e+07	158590000	84233000	96659000	1.13161e+08	0	69885000	212530000	9.41383e+07	57325000	76808000	16416000	50183000
A0A078EEI3	GSTF9	Glutathione S-transferase F9	tr|A0A078EEI3|A0A078EEI3_BRANA BnaC04g41510D protein OS=Brassica napus GN=BnaC04g41510D PE=3 SV=1	24.228	215	1	15918000	0	11074000	8.99733e+06	38218000	99819000	91984000	7.66737e+07	22724000	0	25468000	16064000	22765000	0	0	7.58833e+06	44958000	47867000	0	3.09417e+07	388580000	232990000	203560000	2.75043e+08	0	96533000	41799000	4.61107e+07	187040000	55558000	0	80866000
A0A078FS01	TIM	Triosephosphate isomerase	tr|A0A078FS01|A0A078FS01_BRANA BnaA04g12000D protein OS=Brassica napus GN=BnaA04g12000D PE=3 SV=1;tr|A0A078EEZ6|A0A078EEZ6_BRANA BnaC04g33690D protein OS=Brassica napus GN=BnaC04g33690D PE=3 SV=1;tr|A0A078FL20|A0A078FL20_BRANA BnaA09g43380D protein OS=Bras	33.129	312	4	247330000	234270000	257500000	2.46367e+08	94564000	219060000	142210000	1.51945e+08	182840000	361550000	395850000	3.13413e+08	73058000	162600000	159020000	1.31559e+08	84401000	29210000	59587000	5.77327e+07	306180000	73096000	49929000	1.43068e+08	8576500	358160000	850250000	4.05662e+08	350240000	365850000	75690000	2.63927e+08
A0A078FSQ7	CRR7	Protein CHLORORESPIRATORY REDUCTION 7	tr|A0A078FSQ7|A0A078FSQ7_BRANA BnaA04g11570D protein OS=Brassica napus GN=BnaA04g11570D PE=4 SV=1;tr|A0A078EF51|A0A078EF51_BRANA BnaC04g34240D protein OS=Brassica napus GN=BnaC04g34240D PE=4 SV=1	18.01	156	1	0	0	0	0	0	12470000	0	4.15667e+06	0	0	0	0	0	0	0	0	0	0	0	0	3262200	0	0	1087400	0	0	0	0	0	0	0	0
A0A078EI93	NEET	CDGSH iron-sulfur domain-containing protein	tr|A0A078EI93|A0A078EI93_BRANA BnaA10g07790D protein OS=Brassica napus GN=BnaA10g07790D PE=4 SV=1;tr|A0A078EFP2|A0A078EFP2_BRANA BnaC09g28080D protein OS=Brassica napus GN=BnaC09g28080D PE=4 SV=1	11.719	108	1	15423000	19682000	16823000	1.73093e+07	0	16181000	10863000	9.01467e+06	28574000	57565000	10381000	3.21733e+07	12653000	14623000	0	9092000	33175000	16820000	6192100	1.8729e+07	6450000	8528700	16502000	1.04936e+07	1070800	37596000	17211000	1.86259e+07	16662000	18702000	18376000	1.79133e+07
A0A078EFV5	psaB	Photosystem I P700 chlorophyll a apoprotein A2 (EC 1.97.1.12)	tr|A0A078EFV5|A0A078EFV5_BRANA BnaC04g15560D protein OS=Brassica napus GN=BnaC09g27530D PE=3 SV=1;tr|A0A078HM06|A0A078HM06_BRANA BnaC03g60950D protein OS=Brassica napus GN=BnaC03g60950D PE=3 SV=1;tr|D1L8N6|D1L8N6_BRANA Ribosomal protein S14 OS=Brassica nap	75.249	674	3	2233000	7415300	6624700	5.42433e+06	43037000	0	0	1.43457e+07	0	18875000	4400200	7758400	5942900	1463100	10438000	5948000	0	0	979940	326647	0	7977600	2725800	3567800	0	31683000	39457000	2.37133e+07	3301600	2468400	5108700	3.62623e+06
A0A078H5Q9	ACLB-2	ATP-citrate synthase beta chain protein 2 (ATP-citrate synthase B-2) (EC 2.3.3.8)	tr|A0A078H5Q9|A0A078H5Q9_BRANA BnaA02g30820D protein OS=Brassica napus GN=BnaA02g30820D PE=4 SV=1;tr|A0A078EG34|A0A078EG34_BRANA BnaC09g02690D protein OS=Brassica napus GN=BnaC09g02690D PE=4 SV=1;tr|A0A078JPS4|A0A078JPS4_BRANA BnaAnng28310D protein (Fragme	65.709	608	3	46086000	2308600	479610000	1.76002e+08	57872000	51796000	32758000	4.74753e+07	6419400	8323500	0	4914300	0	22625000	19908000	1.41777e+07	6030100	7040500	0	4.35687e+06	28505000	0	19946000	1.61503e+07	0	0	40811000	1.36037e+07	42028000	11182000	0	1.77367e+07
A0A078EG85	COR413IM2	Cold-regulated 413 inner membrane protein 2	tr|A0A078EG85|A0A078EG85_BRANA BnaC05g22410D protein OS=Brassica napus GN=BnaC05g22410D PE=4 SV=1	24.159	226	1	243120	363020	0	202047	971300	0	554490	508597	0	0	0	0	0	0	4961500	1.65383e+06	0	3388600	2667200	2018600	0	0	3671100	1223700	28440000	8240000	0	1.22267e+07	13082000	5182400	0	6.08813e+06
A0A078I3L6	IIL1	Isopropyl malate isomerase large subunit 1 (Fragment)	tr|A0A078I3L6|A0A078I3L6_BRANA BnaA08g05070D protein OS=Brassica napus GN=BnaA08g05070D PE=4 SV=1;tr|A0A078IWJ5|A0A078IWJ5_BRANA BnaC08g47120D protein OS=Brassica napus GN=BnaC08g47120D PE=4 SV=1;tr|A0A078EGE6|A0A078EGE6_BRANA BnaA04g06890D protein OS=Bras	54.58	504	5	106940000	0	389130000	1.65357e+08	160590000	135980000	203270000	1.66613e+08	233690000	0	0	7.78967e+07	54099000	81146000	3680500	46308500	163490000	44439000	0	6.93097e+07	142400000	113500000	140770000	1.32223e+08	158240000	140980000	47837000	1.15686e+08	200700000	76406000	114060000	1.30389e+08
A0A078EGL9	MAC9.6	Stress up-regulated Nod 19 protein	tr|A0A078EGL9|A0A078EGL9_BRANA BnaA06g21330D protein OS=Brassica napus GN=BnaA06g21330D PE=4 SV=1;tr|A0A078IW34|A0A078IW34_BRANA BnaCnng24580D protein OS=Brassica napus GN=BnaCnng24580D PE=4 SV=1	52.242	469	1	0	0	0	0	0	0	0	0	0	0	0	0	0	0	0	0	0	0	0	0	0	0	0	0	0	0	0	0	0	0	0	0
D1L8Q1	petA	Cytochrome f	tr|D1L8Q1|D1L8Q1_BRANA Cytochrome f OS=Brassica napus GN=petA PE=3 SV=1;tr|A0A1B1Y0Q9|A0A1B1Y0Q9_BRANA Cytochrome f OS=Brassica napus var. napus GN=petA PE=3 SV=1;tr|A0A1B1XZZ1|A0A1B1XZZ1_BRANA Cytochrome f OS=Brassica napus var. napus GN=petA PE=3 SV=1;tr	35.388	320	10	696260000	527930000	1028100000	7.50763e+08	156080000	376160000	398270000	310170000	472540000	879970000	290000000	5.47503e+08	855360000	809740000	1165100000	943400000	699240000	513820000	344600000	519220000	673530000	470200000	375780000	5.06503e+08	205120000	483000000	1237200000	6.41773e+08	667000000	518460000	698330000	627930000
A0A078J862	RPS1	30S ribosomal protein S1	tr|A0A078J862|A0A078J862_BRANA BnaA09g51670D protein OS=Brassica napus GN=BnaA09g51670D PE=4 SV=1;tr|A0A078EGZ0|A0A078EGZ0_BRANA BnaC09g02870D protein OS=Brassica napus GN=BnaC09g02870D PE=4 SV=1	45.146	416	1	126310000	0	48958000	5.84227e+07	545840000	0	3450200	1.83097e+08	0	60093000	462380000	1.74158e+08	558290000	0	0	1.86097e+08	14945000	0	201300000	7.20817e+07	0	699830000	2168600	2.34e+08	0	348220000	0	1.16073e+08	129530000	116120000	71379000	1.05676e+08
A0A078EH49	At1g22330		tr|A0A078EH49|A0A078EH49_BRANA BnaC07g13800D protein OS=Brassica napus GN=BnaC07g13800D PE=4 SV=1	37.775	340	1	0	0	0	0	0	6555900	0	2185300	0	0	0	0	0	4657000	0	1.55233e+06	0	9357900	0	3119300	0	0	0	0	0	0	3306400	1.10213e+06	210980000	0	0	7.03267e+07
A0A078G3T1	LHCB2.4	Chlorophyll a-b binding protein 2.4	tr|A0A078G3T1|A0A078G3T1_BRANA Chlorophyll a-b binding protein, chloroplastic OS=Brassica napus GN=BnaA09g02120D PE=3 SV=1;tr|A0A078IFS9|A0A078IFS9_BRANA Chlorophyll a-b binding protein, chloroplastic OS=Brassica napus GN=BnaA02g29010D PE=3 SV=1;tr|A0A078F	28.609	265	2	0	5676400	0	1.89213e+06	20232000	104380000	31261000	5.19577e+07	0	2255900	0	751967	0	96092000	33411000	4.31677e+07	43013000	38484000	28170000	3.65557e+07	107210000	27795000	271400000	1.35468e+08	0	198930000	109300000	1.02743e+08	60440000	204850000	282820000	1.82703e+08
A0A078EHF3	PAP9	Probable plastid-lipid-associated protein 9	tr|A0A078EHF3|A0A078EHF3_BRANA BnaC04g23840D protein OS=Brassica napus GN=BnaC04g23840D PE=4 SV=1	33.497	302	1	0	0	0	0	0	0	0	0	0	0	0	0	0	4888800	3480900	2789900	0	5069400	5535200	3.53487e+06	0	3552000	0	1184000	0	0	4182800	1.39427e+06	9918100	0	0	3.30603e+06
C0KJK4	GRF10	General regulatory factor 10	tr|C0KJK4|C0KJK4_BRANA 1433-1 OS=Brassica napus PE=2 SV=1;tr|A0A078JUA4|A0A078JUA4_BRANA BnaAnng29600D protein OS=Brassica napus GN=BnaAnng29600D PE=3 SV=1;tr|A0A078I6X6|A0A078I6X6_BRANA BnaA07g10560D protein OS=Brassica napus GN=BnaA07g10560D PE=3 SV=1;tr	28.757	253	1	0	0	0	0	0	0	0	0	0	0	0	0	0	0	0	0	0	0	0	0	0	0	0	0	0	366070	0	122023	0	0	0	0
A0A078EI59	HEMB1	Delta-aminolevulinic acid dehydratase 1	tr|A0A078EI59|A0A078EI59_BRANA Delta-aminolevulinic acid dehydratase OS=Brassica napus GN=BnaC06g27900D PE=3 SV=1;tr|A0A078HPM6|A0A078HPM6_BRANA Delta-aminolevulinic acid dehydratase OS=Brassica napus GN=BnaA07g28250D PE=3 SV=1;tr|A0A078EKR3|A0A078EKR3_BRA	22.656	203	3	72626000	117270000	69387000	8.64277e+07	18548000	107500000	147440000	9.11627e+07	31016000	7897400	9671600	16195000	42335000	14191000	0	18842000	15631000	29931000	20594000	22052000	3439300	286050000	67380000	1.18956e+08	12510000	22699000	122520000	5.25763e+07	17266000	48563000	8577700	2.48022e+07
A0A078F689	CHC1	Clathrin heavy chain 1	tr|A0A078F689|A0A078F689_BRANA Clathrin heavy chain OS=Brassica napus GN=BnaA05g27850D PE=3 SV=1;tr|A0A078EIM4|A0A078EIM4_BRANA Clathrin heavy chain OS=Brassica napus GN=BnaC05g42030D PE=3 SV=1;tr|A0A078F4J2|A0A078F4J2_BRANA Clathrin heavy chain OS=Brassic	174.88	1545	4	0	1600000	2604000	1.40133e+06	0	459100	1028100	495733	0	0	0	0	2932600	4148200	1694800	2925200	0	593630	0	197877	2955400	2914600	626230	2165410	0	8031900	14799000	7610300	12565000	15845000	4764300	11058100
A0A078EIW9	BAS1	2-Cys peroxiredoxin BAS1	tr|A0A078EIW9|A0A078EIW9_BRANA BnaC05g41590D protein OS=Brassica napus GN=BnaC05g41590D PE=4 SV=1;tr|A0A078F9Q1|A0A078F9Q1_BRANA BnaA05g27440D protein OS=Brassica napus GN=BnaA05g27440D PE=4 SV=1	28.568	260	2	20400000	321380000	293160000	2.11647e+08	119680000	146770000	128560000	131670000	0	322660000	343840000	2.22167e+08	327250000	242970000	120110000	230110000	0	156920000	91789000	82903000	205240000	199910000	0	135050000	51838000	194890000	66046000	104258000	0	118960000	0	3.96533e+07
A0A078EJ17	At5g13850	Nascent polypeptide-associated complex subunit alpha-like protein 3	tr|A0A078EJ17|A0A078EJ17_BRANA BnaA03g32240D protein OS=Brassica napus GN=BnaC03g37530D PE=4 SV=1;tr|A0A078HZH3|A0A078HZH3_BRANA BnaC05g40710D protein OS=Brassica napus GN=BnaC05g40710D PE=4 SV=1;tr|A0A078F9H9|A0A078F9H9_BRANA BnaA05g26690D protein OS=Bras	21.749	201	2	0	0	9756200	3.25207e+06	25882000	11048000	6418700	1.44496e+07	8318200	11169000	9780800	9756000	0	0	0	0	4592200	15978000	10710000	1.04267e+07	12930000	0	0	4310000	0	28027000	23005000	1.70107e+07	0	0	9096600	3032200
A0A078EJ50	SAHH2	Adenosylhomocysteinase 2 AdoHcyase 2	tr|A0A078EJ50|A0A078EJ50_BRANA Adenosylhomocysteinase OS=Brassica napus GN=BnaA04g06420D PE=3 SV=1;tr|A0A078IN20|A0A078IN20_BRANA Adenosylhomocysteinase OS=Brassica napus GN=BnaCnng19320D PE=3 SV=1	53.274	485	1	242220	210640	232790	228550	188440	204790	439300	277510	0	0	319720	106573	374710	356340	214380	315143	0	0	0	0	1656400	1004500	423880	1028260	0	17291000	1932000	6.40767e+06	3396800	3586200	1899400	2960800
A0A078EJB3	At5g60890	RPE	tr|A0A078EJB3|A0A078EJB3_BRANA BnaA03g40170D protein OS=Brassica napus GN=BnaA03g40170D PE=4 SV=1;tr|A0A078JCL8|A0A078JCL8_BRANA BnaCnng43240D protein OS=Brassica napus GN=BnaCnng43240D PE=4 SV=1;tr|A0A078JZ28|A0A078JZ28_BRANA BnaAnng38360D protein (Fragme	30.214	282	3	59129000	1814300000	360450000	7.44626e+08	309720000	211830000	501110000	3.40887e+08	289830000	339320000	98711000	2.4262e+08	1318900000	865790000	422840000	8.69177e+08	585120000	394400000	355270000	444930000	1053900000	1561100000	1153900000	1256300000	82040000	377840000	45454000	1.68445e+08	400730000	182040000	393840000	3.25537e+08
A0A078EJE4	GDH1	Glycine cleavage system H protein 1	tr|A0A078EJE4|A0A078EJE4_BRANA Glycine cleavage system H protein OS=Brassica napus GN=BnaC05g24600D PE=3 SV=1	18.013	166	1	0	0	269360000	8.97867e+07	0	0	0	0	0	277380000	315580000	1.97653e+08	0	0	0	0	0	66191000	0	2.20637e+07	27300000	12955000	12500000	17585000	0	0	0	0	41738000	0	0	1.39127e+07
A0A078EUM1	PBC1	Proteasome subunit beta type-3-A (EC 3.4.25.1)	tr|A0A078EUM1|A0A078EUM1_BRANA Proteasome subunit beta type OS=Brassica napus GN=BnaC05g17050D PE=3 SV=1;tr|A0A078EJL7|A0A078EJL7_BRANA Proteasome subunit beta type OS=Brassica napus GN=BnaA07g10890D PE=3 SV=1;tr|A0A078JXZ3|A0A078JXZ3_BRANA BnaAnng36740D p	22.798	204	4	20560000	0	0	6.85333e+06	50012000	36164000	17127000	3.44343e+07	38392000	25875000	23297000	29188000	20824000	8274200	34349000	2.11491e+07	40454000	43872000	0	2.81087e+07	37575000	26127000	58594000	4.07653e+07	27037000	21007000	0	1.60147e+07	27642000	64344000	35396000	4.24607e+07
Q941Q2	AHB2	Non-symbiotic hemoglobin 2 (ARAth GLB2) (Hb2)	sp|Q941Q2|HBL2_BRANA Non-symbiotic hemoglobin 2 OS=Brassica napus GN=HB2 PE=3 SV=1;tr|A0A078F9X3|A0A078F9X3_BRANA BnaA05g28340D protein OS=Brassica napus GN=BnaA05g28340D PE=3 SV=1;tr|A0A078EJM4|A0A078EJM4_BRANA BnaC05g42510D protein OS=Brassica napus GN=B	18.318	161	2	12573000	15942000	20478000	16331000	29009000	14383000	0	14464000	49306000	31138000	30561000	3.70017e+07	19007000	11125000	3440000	1.11907e+07	34310000	19868000	23888000	26022000	2546700	27916000	17403000	1.59552e+07	0	10160000	0	3.38667e+06	36566000	17380000	12170000	2.20387e+07
A0A078FRY4	FLDH	NAD(P)-binding Rossmann-fold superfamily protein	tr|A0A078FRY4|A0A078FRY4_BRANA BnaA04g12100D protein OS=Brassica napus GN=BnaA04g12100D PE=4 SV=1;tr|A0A078EJU7|A0A078EJU7_BRANA BnaC04g33600D protein OS=Brassica napus GN=BnaC04g33600D PE=4 SV=1;tr|A0A078J7S7|A0A078J7S7_BRANA BnaA06g40070D protein OS=Bras	38.29	352	3	45929000	0	0	1.53097e+07	0	31375000	26848000	1.94077e+07	6555800	10310000	3852600	6.90613e+06	9464500	37497000	171890000	72950500	8921500	82640000	31796000	4.11192e+07	70441000	23053000	15898000	36464000	0	6365000	44498000	1.69543e+07	23380000	19813000	26046000	2.30797e+07
A0A078EK91	PTAC5	Protein disulfide isomerase pTAC5	tr|A0A078EK91|A0A078EK91_BRANA BnaA04g06700D protein OS=Brassica napus GN=BnaA04g06700D PE=4 SV=1	42.248	370	1	0	0	4969800	1656600	7621000	0	2525700	3.38223e+06	0	1343300	0	447767	0	0	0	0	0	3974300	6479200	3484500	20154000	10791000	14599000	1.51813e+07	0	0	0	0	0	0	22555000	7.51833e+06
A0A078EK94	GLY3	Persulfide dioxygenase ETHE1 homolog	tr|A0A078EK94|A0A078EK94_BRANA BnaA08g01070D protein OS=Brassica napus GN=BnaA08g01070D PE=4 SV=1;tr|A0A078GKA9|A0A078GKA9_BRANA BnaC03g69760D protein OS=Brassica napus GN=BnaC03g69760D PE=4 SV=1;tr|A0A078I5F4|A0A078I5F4_BRANA BnaC06g06420D protein OS=Bras	28.574	261	1	11418000	0	4956900	5458300	6951800	0	5869900	4273900	7121100	0	7084600	4.73523e+06	0	0	0	0	2701300	0	0	900433	0	0	0	0	0	1711500	0	570500	0	54093000	81785000	4.52927e+07
A0A078FDA9	SBP1	Selenium-binding protein 1	tr|A0A078FDA9|A0A078FDA9_BRANA BnaC08g08300D protein OS=Brassica napus GN=BnaC08g08300D PE=4 SV=1;tr|A0A078JTG3|A0A078JTG3_BRANA BnaCnng60210D protein OS=Brassica napus GN=BnaCnng60210D PE=4 SV=1;tr|A0A078ENT3|A0A078ENT3_BRANA BnaA04g06360D protein OS=Bras	44.354	398	2	6128900	0	18631000	8253300	23858000	14787000	0	1.28817e+07	0	0	26944000	8.98133e+06	0	78915000	0	26305000	122880000	46280000	34644000	6.79347e+07	0	0	0	0	0	8449200	9620900	6.02337e+06	4723900	9988400	47868000	20860100
A0A078EKN6	GLN1-1	Glutamine synthetase cytosolic isozyme 1-1	tr|A0A078EKN6|A0A078EKN6_BRANA Glutamine synthetase OS=Brassica napus GN=BnaC04g30250D PE=3 SV=1;tr|Q42623|Q42623_BRANA Glutamine synthetase OS=Brassica napus GN=gln PE=2 SV=1	38.325	349	3	11316000	9212500	10461000	1.03298e+07	10840000	0	32894000	14578000	16344000	34592000	40042000	30326000	8557200	39379000	47541000	3.18257e+07	520470000	390950000	574730000	4.95383e+08	110410000	29582000	52894000	6.42953e+07	0	33217000	0	1.10723e+07	76218000	238800000	100770000	138596000
A0A078EKT7	psbC	Photosystem II CP43 reaction center protein	tr|A0A078EKT7|A0A078EKT7_BRANA Photosystem II CP43 reaction center protein OS=Brassica napus GN=BnaC09g27520D PE=3 SV=1;tr|A0A078HPI2|A0A078HPI2_BRANA Photosystem II CP43 reaction center protein OS=Brassica napus GN=BnaC03g60960D PE=3 SV=1;tr|D1L8N4|D1L8N4	69.974	634	4	3213100	6982900	4422200	4.87273e+06	11636000	3601300	3699900	6312400	0	1627000	1837000	1.15467e+06	6259900	2972700	0	3.07753e+06	5568400	1829300	1217500	2.87173e+06	6078700	2003800	1118200	3066900	0	31377000	32229000	21202000	76668000	67924000	70333000	7.16417e+07
A0A078EKV8	At1g67280	Probable lactoylglutathione lyase	tr|A0A078EKV8|A0A078EKV8_BRANA BnaC06g28360D protein OS=Brassica napus GN=BnaC06g28360D PE=4 SV=1;tr|A0A078E4S0|A0A078E4S0_BRANA BnaA07g26290D protein OS=Brassica napus GN=BnaA07g26290D PE=4 SV=1	38.369	345	6	1070700000	1046300000	387650000	8.34883e+08	457940000	427830000	597560000	4.94443e+08	761320000	1028300000	2176600000	1.32207e+09	1195500000	576440000	327980000	6.99973e+08	1208100000	903160000	954970000	1.02208e+09	307120000	153190000	257390000	2.39233e+08	94298000	426600000	1130200000	550366000	598910000	480290000	534370000	5.37857e+08
A0A078EL46	PIS1	CDP-diacylglycerol--inositol 3-phosphatidyltransferase 1	tr|A0A078EL46|A0A078EL46_BRANA BnaC06g29160D protein OS=Brassica napus GN=BnaC06g29160D PE=4 SV=1	77.24	693	3	258260000	344720000	391500000	3.31493e+08	339220000	652810000	572040000	5.21357e+08	184790000	97036000	834220000	3.72015e+08	465140000	1189800000	568700000	7.41213e+08	290370000	235970000	1110000000	5.45447e+08	0	0	0	0	130430000	611140000	229670000	3.23747e+08	251570000	144510000	250420000	215500000
A0A078H794	CHL	Chloroplastic lipocalin (AtCHL)	tr|A0A078H794|A0A078H794_BRANA BnaA02g07900D protein OS=Brassica napus GN=BnaA02g07900D PE=3 SV=1;tr|A0A078ENV4|A0A078ENV4_BRANA BnaC02g10970D protein OS=Brassica napus GN=BnaC02g10970D PE=3 SV=1;tr|A0A078EL99|A0A078EL99_BRANA BnaC02g10990D protein OS=Bras	20.512	178	2	0	0	0	0	0	0	0	0	0	6340700	0	2.11357e+06	0	0	5804100	1934700	0	0	0	0	1826900	5828200	0	2551700	0	0	0	0	0	21002000	0	7.00067e+06
A0A078ELP3	ALDH12A1	Delta-1-pyrroline-5-carboxylate dehydrogenase 12A1	tr|A0A078ELP3|A0A078ELP3_BRANA BnaA06g22040D protein OS=Brassica napus GN=BnaA06g22040D PE=4 SV=1;tr|A0A078J813|A0A078J813_BRANA BnaC03g74750D protein OS=Brassica napus GN=BnaC03g74750D PE=4 SV=1	60.699	547	5	24857000	28828000	44722000	3.28023e+07	22297000	11134000	14706000	1.60457e+07	16896000	15217000	21160000	1.77577e+07	24858000	15045000	13295000	1.77327e+07	12797000	8918400	2251100	7.98883e+06	20346000	14158000	14159000	16221000	0	18427000	20293000	1.29067e+07	76041000	75335000	57325000	69567000
A0A078GT28	BCA5	Beta carbonic anhydrase 5(AtbCA5) (AtbetaCA5) (EC 4.2.1.1)	>tr|A0A078GT28|A0A078GT28_BRANA Carbonic anhydrase OS=Brassica napus OX=3708 GN=BnaC03g66520D PE=3 SV=1	35.47	317	3	3019300	3209200	2610100	2.94619e+06	1378250	1428030	1423480	1409920	901900	891000	660100	817756	464000	449200	370200	427800	891000	831800	551000	757933	311000	403000	360000	358000	18889000	16972000	17160000	1.76737e+07	895400	934500	758400	862767
A0A078GT97	EMB3147	EMBRYO DEFECTIVE 3147	tr|A0A078GT97|A0A078GT97_BRANA BnaA04g17370D protein OS=Brassica napus GN=BnaA04g17370D PE=4 SV=1;tr|A0A078FF50|A0A078FF50_BRANA BnaA05g12180D protein OS=Brassica napus GN=BnaA05g12180D PE=4 SV=1;tr|A0A078ELS4|A0A078ELS4_BRANA BnaC04g14590D protein OS=Bras	38.601	367	3	1607600	1646300	2696800	1.98357e+06	27016000	0	42652000	2.32227e+07	12741000	2259300	4167400	6.38923e+06	39871000	15222000	34857000	2.99833e+07	41874000	6727900	40313000	29638300	30004000	18979000	138270000	6.24177e+07	68780000	21762000	11680000	34074000	4712600	19783000	10247000	1.15809e+07
[truncated: 682 more rows]
